# Supplementary material for: mRNA N6-methyladenosine methylation of postnatal liver development in pig
Source: PLoS One. 2017 Mar 7;12(3):e0173421. doi: 10.1371/journal.pone.0173421 (PMC5340393; doi:10.1371/journal.pone.0173421)
Supplement: S3 Table — (XLSX) [file pone.0173421.s008.xlsx]

## Sheet: S3 Table.Newborn peaks
Supplementary table 3: m6A peaks in newborn stage
Chr	start	end	peak_ Enrichment_newborn 1	peak_ Enrichment_newborn 2	peak_Enrichment_newborn 3	feature_centerOverlap	OverlapGene
1	256681	257124	3.67302	5.4791	4.88205	CDS	ENSSSCG00000029697
1	1069878	1070451	6.92202	7.94301	8.8207	intron	ENSSSCG00000004008
1	1069878	1070451	6.92202	7.94301	8.8207	utr_3	ENSSSCG00000004010
1	2670538	2670712	4.49757	13.7122	4.1243	Stop	ENSSSCG00000004017
1	2671164	2671922	5.13849	5.73522	5.28889	utr_3	ENSSSCG00000004017
1	2720467	2720668	6.83782	2.09652	7.50161	utr_3	ENSSSCG00000004018
1	2720885	2721161	1.87179	1.7596	2.77001	utr_3	ENSSSCG00000004018
1	2721543	2721854	3.82953	4.53042	5.16718	Stop	ENSSSCG00000004018
1	2724416	2724902	5.09169	3.59801	4.23702	CDS	ENSSSCG00000004018
1	2727301	2727628	19.9629	11.8389	14.8651	CDS	ENSSSCG00000004018
1	2734685	2735531	6.18916	5.91405	6.13696	CDS	ENSSSCG00000004018
1	2775827	2776020	4.57446	2.43648	3.26906	CDS	ENSSSCG00000004018
1	3306605	3306845	2.57327	1.85026	3.59976	intron	ENSSSCG00000004024
1	3307082	3307279	3.86634	3.29888	5.49294	intergenic	-
1	3681278	3681614	12.4384	13.133	11.9501	intergenic	-
1	3683837	3684143	7.09617	5.44051	10.4434	intergenic	-
1	3687459	3687687	5.78686	11.8364	6.35153	intergenic	-
1	3689401	3689726	11.6509	5.73522	5.29668	intergenic	-
1	3716443	3716663	2.83149	3.00682	2.67131	TSS	ENSSSCG00000004020
1	3740937	3741122	12.4912	10.3761	10.6333	intron	ENSSSCG00000004021
1	3741596	3741850	3.31424	3.87501	3.39649	intergenic	ENSSSCG00000004021
1	4311228	4311467	6.20915	2.96316	5.49654	intergenic	-
1	6555099	6555336	6.64642	18.3094	14.0711	intergenic	-
1	8537074	8537483	7.87076	10.4846	18.0518	CDS	ENSSSCG00000004037
1	8773549	8773761	3.1165	2.87455	3.45382	intron	ENSSSCG00000004038
1	9271221	9271424	3.01892	2.85343	3.22463	intergenic	ENSSSCG00000004044
1	9420564	9421072	5.17415	6.73488	5.59194	CDS	ENSSSCG00000004050
1	9427652	9428051	2.73712	4.15159	3.40498	intron	ENSSSCG00000004050
1	9447099	9447370	5.89872	5.12936	5.94855	intron	ENSSSCG00000004050
1	9447558	9447700	2.81439	3.54515	2.12102	intergenic	-
1	10381547	10381739	12.3833	6.02388	10.2602	intergenic	-
1	10382601	10382799	3.08442	4.71939	5.46322	intergenic	-
1	10383564	10383938	5.59243	6.98484	6.51927	intergenic	-
1	10428326	10428580	8.54123	6.54513	5.83408	intron	ENSSSCG00000004058
1	10429134	10429330	5.23482	3.69099	4.08683	CDS	ENSSSCG00000004058
1	10987881	10988011	17.7004	26.8697	31.0737	intergenic	-
1	11120955	11121191	11.9635	14.1806	15.742	intergenic	-
1	11230864	11231091	9.73637	3.36862	6.05839	intergenic	-
1	11252935	11253242	4.95858	4.394	3.79233	intergenic	-
1	11362319	11362745	11.6478	8.56024	8.43402	intergenic	-
1	11476059	11476820	15.3807	15.7667	19.5877	utr_3	ENSSSCG00000024528
1	11656141	11656351	4.37593	5.0331	5.91627	intergenic	-
1	11754790	11754983	3.95922	4.27323	3.36614	Stop	ENSSSCG00000004063
1	11889254	11889575	6.03918	5.07996	6.26607	CDS	ENSSSCG00000004064
1	11889965	11890952	11.8255	18.6895	13.9383	CDS	ENSSSCG00000004064
1	12312501	12312706	12.351	15.9316	8.47466	intergenic	-
1	13623031	13623231	11.7187	16.4547	8.5746	Stop	ENSSSCG00000004065
1	13623031	13623231	11.7187	16.4547	8.5746	utr_3	ENSSSCG00000004065
1	13623031	13623231	11.7187	16.4547	8.5746	utr_3	ENSSSCG00000024361
1	14083797	14084299	7.35585	8.71397	11.1234	CDS	ENSSSCG00000004070
1	14084827	14085003	3.66082	6.36072	6.13778	CDS	ENSSSCG00000004070
1	14166599	14166805	8.71272	5.41093	6.42484	intron	ENSSSCG00000004070
1	14317734	14318269	14.3475	9.69177	12.739	intergenic	-
1	14450166	14450354	2.72513	5.52851	3.65053	Stop	ENSSSCG00000004071
1	15947796	15948006	10.5856	17.5432	14.247	intergenic	-
1	16507573	16507900	7.28774	5.7179	7.34859	intergenic	-
1	17224492	17224741	3.84792	4.23573	6.42201	CDS	ENSSSCG00000004089
1	17303938	17304391	16.8153	71.0977	34.6795	Stop	ENSSSCG00000004090
1	17318666	17319129	3.47313	4.93091	5.92234	CDS	ENSSSCG00000004091
1	17319718	17320018	2.67503	2.48461	3.03177	CDS	ENSSSCG00000004091
1	17321002	17321223	6.1058	5.70683	4.88867	CDS	ENSSSCG00000004091
1	17321649	17321832	2.60077	2.26305	2.43382	CDS	ENSSSCG00000004091
1	18536582	18536804	2.39149	3.1486	2.86977	CDS	ENSSSCG00000004101
1	18600687	18600896	3.25686	2.89	3.04665	utr_5	ENSSSCG00000004106
1	18625879	18626166	6.97565	6.99548	8.33381	utr_5	ENSSSCG00000004106
1	18853903	18854059	2.50774	4.92863	3.16356	utr_3	ENSSSCG00000004110
1	18878082	18878283	2.77452	4.31672	3.67022	CDS	ENSSSCG00000004110
1	18879091	18879263	1.95997	4.70133	3.11804	CDS	ENSSSCG00000004110
1	18930014	18930452	26.1282	14.2671	18.618	intergenic	-
1	20706116	20706395	43.9363	40.2648	30.4608	utr_5	ENSSSCG00000004113
1	21320175	21320311	2.22879	4.49027	3.77485	Stop	ENSSSCG00000004117
1	21341697	21342044	10.7319	8.16271	9.34798	utr_5	ENSSSCG00000004117
1	22009220	22009453	3.01712	3.72529	8.14643	CDS	ENSSSCG00000004121
1	22009707	22010062	7.30853	7.8411	11.3595	CDS	ENSSSCG00000004121
1	22050594	22050890	20.8721	13.1733	18.6282	TSS	ENSSSCG00000004122
1	22134673	22134880	4.88643	7.64715	5.80434	Stop	ENSSSCG00000004122
1	23480486	23480825	6.75957	6.65797	10.4309	Stop	ENSSSCG00000004125
1	23568850	23569062	2.0508	2.63682	2.84355	intergenic	-
1	23855745	23855907	2.15941	2.03347	1.94544	CDS	ENSSSCG00000004132
1	24927789	24928140	40.4382	31.5878	34.9849	CDS	ENSSSCG00000004138
1	24934404	24934628	22.213	14.0941	12.009	CDS	ENSSSCG00000004138
1	28295944	28296121	5.22859	6.08228	5.92812	CDS	ENSSSCG00000004142
1	28296262	28296653	5.74463	7.8042	7.58481	Stop	ENSSSCG00000004142
1	28455036	28455260	8.90429	8.73546	11.3528	intergenic	-
1	28530117	28530973	4.61751	5.60858	6.18791	CDS	ENSSSCG00000004144
1	28641217	28641446	12.1435	12.7724	25.2841	intergenic	-
1	28641712	28642069	9.64095	6.53255	7.96299	intergenic	ENSSSCG00000004146
1	28871801	28872043	8.46867	8.40602	11.9063	utr_5	ENSSSCG00000004149
1	29115175	29115483	13.696	14.798	23.2653	CDS	ENSSSCG00000004149
1	29116387	29116726	3.89369	5.12788	3.87609	CDS	ENSSSCG00000004149
1	29117568	29117768	2.01709	3.1086	3.70293	CDS	ENSSSCG00000004149
1	29123921	29124509	6.22664	7.32728	6.44927	CDS	ENSSSCG00000004149
1	29826764	29826964	9.16506	6.72138	11.4328	utr_3	ENSSSCG00000004154
1	29827199	29827729	9.41602	11.3943	12.1012	utr_3	ENSSSCG00000004154
1	29829651	29829917	5.27442	12.2697	10.2602	CDS	ENSSSCG00000004154
1	30408367	30408756	3.95036	4.04627	5.18066	CDS	ENSSSCG00000004156
1	30408918	30409225	12.1006	15.1091	9.58078	intergenic	-
1	31432556	31432816	7.56865	15.4685	8.45621	Stop	ENSSSCG00000004165
1	31432991	31433196	11.8936	15.1231	7.69515	utr_3	ENSSSCG00000004165
1	32593383	32593583	4.08113	6.1824	9.31178	intergenic	-
1	32594932	32595313	4.04032	6.04432	6.06399	nc_exon	ENSSSCG00000004170
1	33255458	33255799	5.93768	6.99026	6.59891	utr_3	ENSSSCG00000021443
1	34537527	34537718	3.48378	5.17843	4.57312	CDS	ENSSSCG00000004181
1	34543267	34543463	3.26939	3.21234	3.78428	Stop	ENSSSCG00000004181
1	35134714	35134944	2.76127	5.01048	5.71641	Stop	ENSSSCG00000004192
1	35136857	35137091	2.31486	2.69732	2.82953	TSS	ENSSSCG00000004192
1	35243987	35244283	10.3928	9.42869	9.44628	Stop	ENSSSCG00000004193
1	35594633	35594845	7.84576	6.03883	10.9051	intergenic	-
1	35997373	35997723	6.39724	5.60623	5.83785	CDS	ENSSSCG00000004199
1	36035102	36035302	4.09903	5.52715	6.10927	intergenic	ENSSSCG00000004200
1	37360493	37360714	3.52826	6.8482	7.36128	intron	ENSSSCG00000004206
1	37360493	37360714	3.52826	6.8482	7.36128	intron	ENSSSCG00000004207
1	37360493	37360714	3.52826	6.8482	7.36128	utr_3	ENSSSCG00000004206
1	39594739	39595463	6.64575	6.82094	7.71041	CDS	ENSSSCG00000004217
1	39663526	39663797	16.0913	25.1213	23.3932	intron	ENSSSCG00000004218
1	44781420	44781638	5.29834	7.79934	8.87441	intergenic	-
1	45545599	45545893	9.79472	12.8998	15.2938	Stop	ENSSSCG00000004241
1	47894265	47895570	5.52642	4.71424	5.06642	utr_5	ENSSSCG00000004244
1	48365108	48365310	3.35819	4.92862	4.77754	intron	ENSSSCG00000004246
1	48365108	48365310	3.35819	4.92862	4.77754	utr_5	ENSSSCG00000004247
1	49532516	49532754	9.4449	8.22337	7.08985	utr_5	ENSSSCG00000020885
1	49584196	49584493	14.8275	13.0876	12.6892	TSS	ENSSSCG00000004253
1	49627446	49627674	4.17012	6.92547	6.19901	Stop	ENSSSCG00000004253
1	49647392	49647602	3.41065	3.7432	4.61241	Stop	ENSSSCG00000004254
1	49718627	49718824	11.2209	6.09321	6.66425	intergenic	-
1	57650964	57651307	5.48453	4.49331	3.85978	CDS	ENSSSCG00000004279
1	57663294	57663580	3.63352	4.86404	6.85969	CDS	ENSSSCG00000004279
1	57663935	57664166	11.4563	13.8595	19.5153	intergenic	-
1	57767387	57767652	3.63026	3.32898	3.77761	intergenic	-
1	59273366	59273600	8.65783	15.5987	11.081	CDS	ENSSSCG00000004281
1	60997917	60998131	2.44598	2.69311	4.12167	intergenic	-
1	61000169	61000382	3.6667	3.01986	2.77649	CDS	ENSSSCG00000004294
1	62397085	62397307	7.72765	6.72591	12.8985	CDS	ENSSSCG00000025140
1	62397659	62397863	7.34604	16.1694	12.2023	CDS	ENSSSCG00000025140
1	62403548	62403853	41.425	48.2703	49.7226	Stop	ENSSSCG00000025140
1	62812778	62813115	4.16494	4.00606	3.60599	utr_5	ENSSSCG00000004307
1	63822327	63822490	4.01254	6.81649	9.20487	intergenic	-
1	63871868	63872080	3.42099	5.01006	3.7418	Stop	ENSSSCG00000026249
1	63966119	63966385	4.10567	4.82886	3.0713	CDS	ENSSSCG00000004314
1	64142105	64142333	4.27046	4.24756	4.07913	TSS	ENSSSCG00000004317
1	64551785	64551984	4.91327	5.28769	10.0625	intergenic	-
1	64643673	64643873	7.69585	5.53898	4.99896	CDS	ENSSSCG00000004328
1	64916798	64917373	3.8042	7.17014	7.57459	CDS	ENSSSCG00000004332
1	71041611	71041888	4.58869	5.15517	5.75204	CDS	ENSSSCG00000004337
1	71079857	71080151	4.17234	5.27322	4.68568	Stop	ENSSSCG00000004337
1	74469047	74469324	2.80423	4.39491	4.16046	CDS	ENSSSCG00000004347
1	80313073	80313282	7.25475	6.196	13.2467	CDS	ENSSSCG00000004364
1	80376139	80376334	13.7126	12.4705	17.183	intergenic	ENSSSCG00000004364
1	80817270	80817470	2.33708	3.59319	2.2641	Stop	ENSSSCG00000004368
1	81997503	81997713	2.62359	1.36574	2.80323	CDS	ENSSSCG00000004371
1	82004855	82005077	5.09725	5.94462	8.79446	Stop	ENSSSCG00000004371
1	82059750	82059986	8.37213	12.8539	9.22815	utr_3	ENSSSCG00000004371
1	82526329	82526587	6.24323	9.02139	7.85733	intergenic	-
1	83124539	83124926	6.42007	7.44128	7.16122	intergenic	-
1	83348945	83349347	13.6195	11.8716	13.5367	utr_5	ENSSSCG00000004382
1	83451515	83451737	2.5088	2.29976	2.9608	CDS	ENSSSCG00000004383
1	83887919	83888695	7.19444	7.49399	8.75823	CDS	ENSSSCG00000004387
1	84048500	84048904	3.18959	4.89158	5.67686	Stop	ENSSSCG00000004387
1	84065862	84066283	5.61447	6.1897	7.96644	intergenic	-
1	84463930	84464152	16.5286	5.50302	4.87693	utr_5	ENSSSCG00000020883
1	84789265	84789449	2.99838	4.29299	3.58909	Stop	ENSSSCG00000004408
1	86106287	86106511	8.52662	14.1806	28.8018	intergenic	-
1	86423345	86423539	3.74798	4.5917	4.97728	TSS	ENSSSCG00000004392
1	86469901	86470101	15.654	42.3257	21.9861	intergenic	-
1	86714814	86715111	5.68443	6.25447	9.81069	intergenic	ENSSSCG00000004417
1	86960430	86960646	4.8053	3.60432	3.14749	intergenic	-
1	87084048	87084246	2.68189	2.75636	3.8901	CDS	ENSSSCG00000004420
1	87146513	87146791	5.59698	9.85484	7.29208	Stop	ENSSSCG00000004421
1	87423665	87423937	4.6396	4.49149	3.95751	intergenic	-
1	89851392	89851616	1.37288	2.08879	2.06256	utr_5	ENSSSCG00000023610
1	89853806	89854045	3.65984	3.01048	3.30748	Stop	ENSSSCG00000023610
1	89854246	89854636	8.93027	6.43288	6.89934	utr_3	ENSSSCG00000023610
1	89962696	89962985	1.75678	1.93938	1.81904	CDS	ENSSSCG00000004432
1	92006760	92007002	5.11029	6.65795	8.13487	intergenic	-
1	92007166	92007394	2.5084	2.70584	4.39723	Stop	ENSSSCG00000004439
1	92023001	92023982	3.66766	5.56776	5.65528	intergenic	ENSSSCG00000004438
1	92024284	92025116	5.95034	5.37372	6.21963	CDS	ENSSSCG00000004438
1	92247085	92247298	7.81828	11.7494	11.4328	CDS	ENSSSCG00000004441
1	92247844	92248069	8.12337	7.7148	7.91502	CDS	ENSSSCG00000004441
1	92248325	92248577	11.3745	15.9882	17.8088	CDS	ENSSSCG00000004441
1	92329182	92329462	8.34773	2.58166	4.1285	CDS	ENSSSCG00000004444
1	94547724	94547920	4.01034	4.95248	8.75256	CDS	ENSSSCG00000004460
1	95104472	95104722	5.22091	6.67699	5.18725	intron	ENSSSCG00000004464
1	95104942	95105544	6.5445	5.60382	6.09124	CDS	ENSSSCG00000004464
1	95106665	95107271	7.6795	7.87307	8.78453	CDS	ENSSSCG00000004464
1	96716336	96716564	10.7228	8.09041	10.9051	TSS	ENSSSCG00000004465
1	97114662	97114964	2.82648	5.49953	4.57055	intergenic	-
1	97116271	97116481	4.19774	5.05605	4.4886	intergenic	-
1	97758489	97758694	3.4889	4.16533	5.66066	Stop	ENSSSCG00000004470
1	101174429	101174647	4.01783	4.39901	4.66488	Stop	ENSSSCG00000020702
1	101299781	101300206	7.75099	5.48244	5.70724	intergenic	-
1	101833121	101833477	8.65527	8.86394	10.9494	intron	ENSSSCG00000004484
1	106025739	106025946	6.628	8.72813	9.49803	CDS	ENSSSCG00000004500
1	106026217	106026417	4.96293	5.19645	8.13102	CDS	ENSSSCG00000004500
1	108027066	108027273	13.804	12.2591	15.7201	Stop	ENSSSCG00000004506
1	108089204	108089562	2.29261	2.89477	3.21502	CDS	ENSSSCG00000004507
1	108116816	108117543	10.0046	11.0844	11.2848	CDS	ENSSSCG00000004507
1	108118200	108118355	6.47148	5.17844	5.30505	intergenic	-
1	108870495	108870759	12.2784	8.56025	4.36059	nc_exon	ENSSSCG00000020045
1	109590502	109590703	21.4085	19.0228	39.8682	intergenic	-
1	109591096	109591342	5.98401	5.37216	7.31443	utr_3	ENSSSCG00000004516
1	109627226	109627436	5.61885	3.57286	3.34728	CDS	ENSSSCG00000004517
1	110466190	110466393	18.8898	11.699	19.0965	Stop	ENSSSCG00000024479
1	110509236	110509481	8.06103	5.76042	5.78171	utr_5	ENSSSCG00000004524
1	110613491	110613764	5.02387	6.48502	6.02513	Stop	ENSSSCG00000004525
1	110613972	110614229	4.63631	6.63774	7.37757	CDS	ENSSSCG00000004525
1	114063358	114063768	14.3188	10.3622	12.486	TSS	ENSSSCG00000004528
1	117246333	117246776	13.58	17.2838	20.332	nc_exon	ENSSSCG00000030235
1	117246333	117246776	13.58	17.2838	20.332	TSS	ENSSSCG00000004540
1	117590300	117590522	3.59229	6.45416	4.13857	intergenic	-
1	117595892	117596101	6.76302	13.7236	11.1088	intergenic	-
1	118018736	118019028	9.51987	12.0477	10.6489	CDS	ENSSSCG00000004547
1	118126967	118127176	3.10794	3.10706	3.14897	Stop	ENSSSCG00000004549
1	118169045	118169165	3.1811	3.95473	3.42521	Stop	ENSSSCG00000004550
1	118181306	118181494	7.7396	10.2089	10.4201	CDS	ENSSSCG00000004551
1	118182512	118182711	5.65527	7.12298	6.90175	CDS	ENSSSCG00000004551
1	118378105	118378614	4.63401	5.45399	5.5917	CDS	ENSSSCG00000004551
1	118408660	118408905	13.3428	17.5528	12.195	TSS	ENSSSCG00000004551
1	120002190	120002396	3.55553	4.01454	4.59395	Stop	ENSSSCG00000026571
1	120133554	120134067	4.39289	3.95142	4.29031	Stop	ENSSSCG00000004569
1	120234529	120234762	3.68844	3.42851	2.7125	intron	ENSSSCG00000004570
1	120239953	120240126	2.4067	1.70007	1.97703	TSS	ENSSSCG00000004570
1	121351364	121351772	5.7509	3.46288	5.07514	Stop	ENSSSCG00000004573
1	121352091	121352344	6.2966	5.11935	2.97515	CDS	ENSSSCG00000004573
1	123140618	123140824	5.271	7.02378	7.64852	TSS	ENSSSCG00000004576
1	123195399	123195621	4.75007	6.86179	6.35155	intron	ENSSSCG00000004576
1	123195987	123196188	7.66402	10.991	16.9607	intron	ENSSSCG00000004576
1	123238548	123238960	4.00802	4.69445	5.05966	utr_3	ENSSSCG00000004576
1	125013309	125013505	14.0463	13.633	18.058	CDS	ENSSSCG00000004589
1	125109269	125109469	6.21588	7.30878	6.83571	TSS	ENSSSCG00000004589
1	125475814	125476099	4.46522	6.95388	5.36689	Stop	ENSSSCG00000004595
1	126391365	126391662	6.78852	7.49114	8.57748	CDS	ENSSSCG00000030605
1	126547477	126547916	8.89395	7.58645	6.63249	intergenic	-
1	126579398	126579598	3.30377	2.75003	2.52991	intergenic	-
1	128199197	128199375	30.9583	21.3055	19.3478	intergenic	-
1	128805883	128806152	4.44466	5.9149	6.53305	CDS	ENSSSCG00000004607
1	128806368	128806591	11.0846	20.9703	16.0813	Stop	ENSSSCG00000004607
1	128807784	128808166	13.6426	13.6103	13.4665	intergenic	-
1	129025055	129025501	7.78212	7.2231	10.626	CDS	ENSSSCG00000004610
1	129025055	129025501	7.78212	7.2231	10.626	utr_3	ENSSSCG00000024046
1	131981755	131982185	6.2966	6.3472	6.79984	utr_5	ENSSSCG00000004616
1	132018554	132019089	7.48411	8.41262	10.8679	intergenic	ENSSSCG00000004616
1	132089282	132090146	18.1901	13.7895	14.2026	intergenic	-
1	132202940	132203149	3.79194	4.59265	6.23791	TSS	ENSSSCG00000004618
1	132216025	132216200	1.27878	1.14279	1.55862	intron	ENSSSCG00000004618
1	133199552	133199844	3.81814	3.09799	3.25911	CDS	ENSSSCG00000004629
1	134286868	134287068	13.4574	14.6067	11.1514	CDS	ENSSSCG00000004634
1	134343557	134343744	8.81525	11.4137	11.7259	TSS	ENSSSCG00000004634
1	135128977	135129191	12.943	20.5023	16.2209	Stop	ENSSSCG00000004645
1	135221426	135221631	1.58079	1.84207	1.85939	CDS	ENSSSCG00000004643
1	136509289	136509830	4.35919	5.76209	5.93626	CDS	ENSSSCG00000004653
1	136635479	136635679	10.7224	17.736	17.4501	intron	ENSSSCG00000004655
1	136636116	136636314	6.2966	14.3728	5.66754	intron	ENSSSCG00000004655
1	136636721	136636946	5.98459	4.93405	5.04867	CDS	ENSSSCG00000004656
1	136636721	136636946	5.98459	4.93405	5.04867	intron	ENSSSCG00000004655
1	138044958	138045159	11.9373	9.80405	13.8952	CDS	ENSSSCG00000004663
1	140861563	140861845	7.47832	8.45907	7.94432	TSS	ENSSSCG00000004672
1	140888557	140888753	4.67873	5.34449	6.33201	TSS	ENSSSCG00000004671
1	141148775	141149009	7.29081	8.68431	8.02494	intron	ENSSSCG00000004674
1	141257240	141257461	6.01576	4.49631	4.43241	utr_3	ENSSSCG00000004679
1	141742452	141742681	15.3871	12.0091	10.4926	intron	ENSSSCG00000004691
1	141742452	141742681	15.3871	12.0091	10.4926	intron	ENSSSCG00000004691
1	141742452	141742681	15.3871	12.0091	10.4926	intron	ENSSSCG00000023996
1	141757219	141757421	4.87548	8.42815	11.3503	intron	ENSSSCG00000004690
1	141757219	141757421	4.87548	8.42815	11.3503	intron	ENSSSCG00000023996
1	142585107	142585423	4.67306	6.15401	5.59913	intergenic	-
1	142589073	142589396	5.59176	3.77658	4.02662	TSS	ENSSSCG00000004697
1	142982745	142982957	7.34601	8.2432	9.21903	CDS	ENSSSCG00000004711
1	143982231	143982532	17.9851	22.2664	55.8449	intron	ENSSSCG00000004729
1	144360893	144361111	33.9755	11.8364	8.28528	TSS	ENSSSCG00000004735
1	144486120	144486655	10.7517	9.99405	12.8805	utr_3	ENSSSCG00000027182
1	144545926	144546123	21.4384	19.0228	16.3186	Stop	ENSSSCG00000004738
1	144622370	144622589	4.87678	7.60911	3.35417	utr_3	ENSSSCG00000020666
1	144624730	144625056	17.5719	21.7032	29.9315	Stop	ENSSSCG00000020666
1	144947182	144947465	8.82813	6.1946	7.42901	CDS	ENSSSCG00000004746
1	144960260	144960809	3.31077	4.68808	3.63235	utr_3	ENSSSCG00000004747
1	145010250	145010496	17.9548	15.81	10.5271	TSS	ENSSSCG00000004747
1	145523318	145523780	11.9125	12.7453	8.86728	Stop	ENSSSCG00000004754
1	145539827	145540077	17.7238	16.8035	21.3136	Stop	ENSSSCG00000004755
1	145541367	145541577	8.76273	9.25779	10.4145	CDS	ENSSSCG00000004755
1	145571059	145571605	4.82591	7.2851	5.28272	Stop	ENSSSCG00000004757
1	145573976	145574566	7.41209	7.60911	7.23175	CDS	ENSSSCG00000004757
1	145574836	145575202	2.9469	4.61983	5.10078	CDS	ENSSSCG00000004757
1	145714302	145714559	3.26939	4.10719	1.13072	intron	ENSSSCG00000004762
1	145714302	145714559	3.26939	4.10719	1.13072	intron	ENSSSCG00000004760
1	145714755	145714967	5.29714	6.16173	6.30269	CDS	ENSSSCG00000004763
1	145714755	145714967	5.29714	6.16173	6.30269	intron	ENSSSCG00000004762
1	145714755	145714967	5.29714	6.16173	6.30269	intron	ENSSSCG00000004760
1	145717801	145717975	3.17692	3.10518	3.31722	intron	ENSSSCG00000004760
1	145717801	145717975	3.17692	3.10518	3.31722	utr_3	ENSSSCG00000004764
1	145721985	145722155	5.98177	5.94462	14.9506	intron	ENSSSCG00000004760
1	145809511	145809711	6.27035	4.17038	4.24295	intron	ENSSSCG00000004760
1	145930806	145931049	13.0829	8.13749	11.2298	intergenic	-
1	145931264	145931486	6.54647	8.08468	11.3595	CDS	ENSSSCG00000004771
1	145931679	145932018	25.7861	20.7137	22.2324	CDS	ENSSSCG00000004771
1	145932205	145932401	3.05899	3.90573	3.26321	intergenic	-
1	145935689	145935944	5.53523	3.35809	3.4772	utr_3	ENSSSCG00000004772
1	145937063	145937295	2.56257	2.55902	2.99386	Stop	ENSSSCG00000004772
1	145943159	145943731	5.642	6.24361	6.01097	CDS	ENSSSCG00000004772
1	145958535	145958741	14.2578	8.16587	9.14624	intergenic	-
1	146126731	146127860	21.8936	21.2305	21.7331	intergenic	-
1	146211862	146212038	4.35919	4.59717	2.63834	intergenic	-
1	146212920	146213123	3.22117	7.35246	5.86297	intergenic	-
1	146907552	146908009	7.51298	11.2234	13.3469	utr_3	ENSSSCG00000004789
1	148443040	148443293	9.78595	15.5134	16.5808	CDS	ENSSSCG00000004793
1	148550474	148550711	7.89655	7.45813	6.96961	intergenic	-
1	148735498	148735708	5.14223	9.20701	80.0296	intergenic	-
1	152213669	152213883	5.0063	3.32898	3.61036	Stop	ENSSSCG00000030003
1	153854110	153854491	17.9544	10.9139	24.5445	intergenic	-
1	154041898	154042103	12.2934	13.8444	10.4654	CDS	ENSSSCG00000029613
1	154042890	154043149	13.2843	14.7691	18.7615	CDS	ENSSSCG00000029613
1	154688326	154688532	2.01018	2.4499	3.37786	Stop	ENSSSCG00000028771
1	154775326	154775559	4.30268	7.2783	8.10346	CDS	ENSSSCG00000030487
1	155373374	155373574	3.12597	5.38977	3.82924	CDS	ENSSSCG00000004820
1	155426652	155426952	10.9043	13.9056	21.9861	CDS	ENSSSCG00000004821
1	155961210	155961422	60.3425	13.633	24.7343	Stop	ENSSSCG00000004825
1	155961653	155961860	5.90307	11.9325	10.6706	CDS	ENSSSCG00000004825
1	155962227	155962398	3.49811	3.52481	4.35326	CDS	ENSSSCG00000004825
1	156033848	156034291	24.2419	16.7468	25.231	intergenic	-
1	157765643	157765875	5.72538	6.44423	5.62216	nc_exon	ENSSSCG00000004831
1	157783837	157784106	10.1795	5.44375	7.55397	utr_5	ENSSSCG00000004832
1	157856170	157856914	3.13523	4.64595	5.5839	CDS	ENSSSCG00000004832
1	158276722	158276950	2.14321	2.91977	2.82273	nc_exon	ENSSSCG00000004834
1	159399450	159399658	4.13111	7.39559	6.49895	utr_3	ENSSSCG00000026006
1	159399998	159400843	4.58156	4.88491	5.30807	utr_3	ENSSSCG00000026006
1	159484716	159485228	4.01823	4.14464	3.78017	CDS	ENSSSCG00000026006
1	159860277	159860737	5.32386	6.29406	7.66303	CDS	ENSSSCG00000004844
1	159935585	159935828	3.4459	3.30635	3.57986	CDS	ENSSSCG00000004847
1	159967695	159967964	4.5885	6.1708	8.44077	Stop	ENSSSCG00000004846
1	160546750	160547033	5.75046	4.26853	3.87584	TSS	ENSSSCG00000004852
1	161283945	161284244	5.41733	2.26305	3.19206	intergenic	-
1	161792726	161792963	22.7561	10.9545	12.3123	utr_5	ENSSSCG00000004857
1	162978650	162978869	34.931	20.3461	19.7875	intergenic	-
1	163944345	163944761	8.26658	9.63469	8.28924	CDS	ENSSSCG00000004859
1	163944930	163945256	6.81515	8.28849	8.19643	CDS	ENSSSCG00000004859
1	164052905	164053080	2.46495	3.80455	3.29792	intergenic	-
1	164773997	164774400	7.55593	11.0425	12.5174	intergenic	-
1	164775954	164776386	21.4084	17.891	19.5877	intergenic	-
1	164780304	164780517	7.92906	8.21438	15.1704	intergenic	-
1	164781235	164781442	9.1587	12.3648	18.2485	intergenic	-
1	164783272	164783468	3.73877	4.05989	5.96334	nc_exon	ENSSSCG00000004862
1	164783669	164783921	2.59751	3.75045	3.60721	nc_exon	ENSSSCG00000004862
1	164832713	164832912	3.0198	2.88059	3.3254	TSS	ENSSSCG00000004861
1	164833081	164833572	6.2638	6.91737	7.33832	CDS	ENSSSCG00000004861
1	164834603	164834814	3.18645	2.35717	5.08549	CDS	ENSSSCG00000004861
1	164835463	164836054	8.48226	12.6818	12.4504	Stop	ENSSSCG00000004861
1	165071163	165071542	10.3474	9.71408	7.89548	nc_exon	ENSSSCG00000004863
1	165071830	165072459	16.8093	12.0795	13.8366	nc_exon	ENSSSCG00000004863
1	165529568	165529854	7.61289	5.77024	5.93771	intron	ENSSSCG00000004870
1	168992089	168993268	10.2989	14.5208	15.8923	CDS	ENSSSCG00000004878
1	173662673	173662922	22.248	11.8213	21.5464	Stop	ENSSSCG00000004886
1	176120386	176120799	4.5893	9.21103	5.1816	Stop	ENSSSCG00000004896
1	176408419	176408620	4.34464	7.64081	6.44063	CDS	ENSSSCG00000004897
1	176409003	176409160	1.86566	3.69266	2.42727	CDS	ENSSSCG00000004897
1	176409480	176409876	14.5623	15.0749	15.6321	CDS	ENSSSCG00000004897
1	176515164	176515420	7.45095	7.8387	8.25913	nc_exon	ENSSSCG00000021838
1	176515643	176515844	5.9293	12.2062	8.2448	intergenic	-
1	176595698	176595995	31.3596	16.8179	22.5138	Stop	ENSSSCG00000004898
1	176608603	176608958	16.5723	26.3601	20.2822	CDS	ENSSSCG00000004898
1	176780801	176781013	5.97089	6.07268	4.99525	CDS	ENSSSCG00000004899
1	177064224	177064475	10.0862	14.4483	30.4288	intergenic	-
1	177064931	177065169	3.1483	4.57161	3.87991	TSS	ENSSSCG00000004902
1	179453710	179453928	16.8863	17.1937	14.3852	Stop	ENSSSCG00000004915
1	179909698	179909911	3.57254	2.89197	4.52654	intergenic	-
1	180550941	180551158	20.0627	9.51139	9.70423	intergenic	-
1	180682133	180682327	8.25555	11.7942	11.6283	Stop	ENSSSCG00000004926
1	180693756	180693962	11.1095	4.39903	6.69734	CDS	ENSSSCG00000004926
1	180699751	180699983	2.02513	2.33606	3.85123	Stop	ENSSSCG00000004927
1	180747045	180747249	4.22264	4.34167	4.90853	TSS	ENSSSCG00000004927
1	180894112	180894336	8.77709	4.96246	6.86807	TSS	ENSSSCG00000004929
1	181024992	181025167	5.84182	7.01467	12.3123	Stop	ENSSSCG00000004934
1	181091563	181091759	10.6255	11.4869	11.7626	TSS	ENSSSCG00000004934
1	181142813	181143324	14.6682	18.1532	15.7762	utr_3	ENSSSCG00000004936
1	181492643	181492899	2.06764	2.45078	2.49031	utr_5	ENSSSCG00000022696
1	182138436	182138648	4.21138	5.18668	5.39138	intergenic	-
1	182188795	182189007	9.77631	11.6139	10.0122	intron	ENSSSCG00000004943
1	182188795	182189007	9.77631	11.6139	10.0122	utr_3	ENSSSCG00000004943
1	182188795	182189007	9.77631	11.6139	10.0122	utr_3	ENSSSCG00000023980
1	182399479	182401108	15.7906	14.502	18.5118	intergenic	ENSSSCG00000004948
1	182685440	182685636	8.44106	8.51703	12.5007	intergenic	-
1	182899025	182899223	3.29058	5.81552	3.78428	utr_3	ENSSSCG00000004952
1	182901391	182901600	7.12511	10.1455	7.36128	utr_3	ENSSSCG00000004952
1	182902627	182903215	7.77535	12.5733	13.8199	utr_3	ENSSSCG00000004952
1	183918911	183919570	4.61751	4.27512	4.75717	intron	ENSSSCG00000004958
1	183918911	183919570	4.61751	4.27512	4.75717	intron	ENSSSCG00000022419
1	183928165	183929113	3.46389	4.85177	5.46197	CDS	ENSSSCG00000022419
1	183928165	183929113	3.46389	4.85177	5.46197	intron	ENSSSCG00000004958
1	183929417	183929912	8.5354	11.3211	10.8866	intron	ENSSSCG00000004958
1	183929417	183929912	8.5354	11.3211	10.8866	Stop	ENSSSCG00000022419
1	183948646	183948883	7.87883	8.58952	9.82048	utr_3	ENSSSCG00000004958
1	184440707	184440891	32.5325	49.9348	24.6245	intergenic	-
1	184629834	184630495	36.9401	17.9619	10.5001	intergenic	-
1	185088289	185089178	5.50258	7.41949	7.25898	CDS	ENSSSCG00000026078
1	186647443	186647632	4.98481	3.26413	4.67991	CDS	ENSSSCG00000004973
1	187975760	187976103	29.4796	61.8241	49.6886	intron	ENSSSCG00000004980
1	187975760	187976103	29.4796	61.8241	49.6886	Stop	ENSSSCG00000020940
1	188410866	188411192	2.6579	3.37905	3.55296	CDS	ENSSSCG00000022828
1	188627023	188627264	6.47149	7.77311	5.72617	CDS	ENSSSCG00000004989
1	194967642	194967891	13.4094	15.6938	17.8235	Stop	ENSSSCG00000004996
1	194971802	194971980	8.46106	7.92616	6.65866	CDS	ENSSSCG00000004996
1	194977246	194977433	6.11141	5.82572	9.27416	CDS	ENSSSCG00000004996
1	199864368	199864774	9.05135	8.21	7.30908	TSS	ENSSSCG00000005006
1	199864954	199865180	5.36438	5.71295	5.85981	CDS	ENSSSCG00000005006
1	199865552	199866152	11.1091	11.4631	11.6479	CDS	ENSSSCG00000005006
1	199875918	199876165	6.00143	5.19163	6.5727	CDS	ENSSSCG00000005007
1	199876881	199877564	12.3409	10.2229	9.51008	TSS	ENSSSCG00000005007
1	199959110	199959316	10.4194	14.0942	12.2523	intergenic	-
1	200073909	200075135	8.00647	8.38398	7.59672	TSS	ENSSSCG00000005012
1	200356060	200356287	5.04863	4.89559	4.95687	intergenic	-
1	200724465	200724803	19.9796	12.8404	13.3324	intergenic	-
1	201220290	201220513	2.69354	1.87316	2.50234	TSS	ENSSSCG00000021213
1	201695348	201695800	4.61196	5.89707	7.89778	Stop	ENSSSCG00000005027
1	201696057	201696336	14.3423	16.6449	17.9658	utr_3	ENSSSCG00000005027
1	202588654	202589013	8.57306	10.3465	14.1111	intergenic	ENSSSCG00000005037
1	202628196	202628389	2.40753	4.1049	3.28046	TSS	ENSSSCG00000005039
1	202693784	202693971	3.3888	2.90829	3.2857	TSS	ENSSSCG00000005040
1	203017962	203018166	5.3024	4.95385	7.70808	CDS	ENSSSCG00000005043
1	203018497	203018701	5.84685	4.17822	5.23844	utr_5	ENSSSCG00000005043
1	203774335	203774602	7.87072	8.41162	7.16748	CDS	ENSSSCG00000005045
1	204900381	204900551	5.66694	6.54607	5.53725	CDS	ENSSSCG00000005053
1	204900823	204901159	5.57007	6.87415	7.91503	CDS	ENSSSCG00000005053
1	205237794	205238018	7.47722	10.5305	14.7476	nc_exon	ENSSSCG00000005057
1	205238692	205239180	6.67822	12.3864	9.70729	intergenic	ENSSSCG00000005057
1	206216375	206216591	19.8226	24.5794	42.7997	Stop	ENSSSCG00000021134
1	206501611	206501882	6.05443	8.41613	9.39405	Stop	ENSSSCG00000005062
1	206908393	206908598	19.2934	14.8193	18.4432	intergenic	-
1	207011020	207011192	8.32988	18.0716	16.7723	CDS	ENSSSCG00000005065
1	207103203	207103820	7.25245	6.443	7.35035	CDS	ENSSSCG00000005064
1	210373684	210374032	5.93625	5.7601	5.54203	intergenic	-
1	210390805	210391231	2.80334	4.25692	4.01417	CDS	ENSSSCG00000005084
1	211197824	211198044	6.89628	8.77974	9.45401	CDS	ENSSSCG00000024529
1	211525881	211526165	4.43991	6.91856	6.46245	intergenic	-
1	211527306	211527509	5.33648	4.42354	5.12804	intergenic	-
1	211586988	211587290	11.2079	14.8723	10.243	utr_5	ENSSSCG00000030657
1	211816883	211817201	17.1972	17.6151	19.3762	utr_3	ENSSSCG00000005095
1	212635032	212635250	7.14927	6.97502	3.78268	Stop	ENSSSCG00000005102
1	212639759	212639934	3.07334	2.49674	2.32732	CDS	ENSSSCG00000005102
1	212702981	212703290	2.91509	6.54382	5.88691	CDS	ENSSSCG00000005103
1	212763958	212764206	5.56016	8.47633	5.63395	Stop	ENSSSCG00000005105
1	216298482	216298739	11.0453	8.58402	7.57875	utr_5	ENSSSCG00000028558
1	216418881	216419086	4.67873	5.41418	4.50716	intergenic	-
1	216419765	216420011	4.31767	6.8851	4.76603	intergenic	-
1	216446591	216446956	11.1825	12.9745	12.3122	CDS	ENSSSCG00000005112
1	216796811	216797007	2.77663	3.25644	3.01114	Stop	ENSSSCG00000022804
1	218224850	218225064	4.44389	6.70025	9.28307	Stop	ENSSSCG00000005122
1	218678118	218678321	4.35206	4.47828	3.90865	TSS	ENSSSCG00000005127
1	218721132	218721320	4.65088	5.65249	6.07315	Stop	ENSSSCG00000005127
1	219726452	219726847	7.6151	6.49945	5.44029	CDS	ENSSSCG00000005128
1	224076832	224077033	1.30314	2.55398	2.71529	Stop	ENSSSCG00000005135
1	224616516	224616772	16.0413	13.5198	11.2298	intron	ENSSSCG00000022426
1	224616516	224616772	16.0413	13.5198	11.2298	intron	ENSSSCG00000022426
1	224616516	224616772	16.0413	13.5198	11.2298	intron	ENSSSCG00000029085
1	224957322	224958046	8.84005	11.1133	10.8274	CDS	ENSSSCG00000005150
1	224957322	224958046	8.84005	11.1133	10.8274	intron	ENSSSCG00000005150
1	224957322	224958046	8.84005	11.1133	10.8274	intron	ENSSSCG00000028884
1	224958362	224958976	6.61143	9.20425	10.3451	CDS	ENSSSCG00000005150
1	224958362	224958976	6.61143	9.20425	10.3451	intron	ENSSSCG00000005150
1	224958362	224958976	6.61143	9.20425	10.3451	intron	ENSSSCG00000028884
1	224959469	224959723	1.806	2.73011	2.61357	intron	ENSSSCG00000028884
1	227135476	227135717	2.99283	3.36755	5.85169	CDS	ENSSSCG00000005170
1	227420648	227420880	3.64903	3.63209	4.87042	CDS	ENSSSCG00000005174
1	230981743	230981945	13.3326	9.49344	20.0624	TSS	ENSSSCG00000005183
1	233480727	233481071	20.5572	25.9917	17.4583	intergenic	-
1	233603438	233603883	4.53549	6.26974	5.80435	intergenic	-
1	238397937	238398135	9.35745	12.8404	10.8831	intergenic	-
1	241128671	241129099	8.097	6.48255	6.28826	CDS	ENSSSCG00000023898
1	241783938	241784182	7.91846	11.2778	11.8725	CDS	ENSSSCG00000005204
1	241784393	241784945	8.03646	8.5064	8.15981	CDS	ENSSSCG00000005204
1	241785104	241785884	8.7377	12.083	11.5035	CDS	ENSSSCG00000005204
1	241842271	241842518	12.1934	11.4137	12.8252	TSS	ENSSSCG00000005205
1	241949140	241949350	6.46584	6.53282	12.9404	utr_5	ENSSSCG00000005205
1	241949699	241950077	1.85525	2.85343	2.39849	CDS	ENSSSCG00000005205
1	241950645	241950860	4.37764	5.8548	6.92756	CDS	ENSSSCG00000005205
1	241951406	241951572	2.49241	3.18631	2.29481	CDS	ENSSSCG00000005205
1	242045603	242045899	28.0395	17.8339	15.1504	CDS	ENSSSCG00000005207
1	242117338	242117669	5.4156	5.89982	7.27638	Stop	ENSSSCG00000005208
1	242681910	242682153	11.5437	11.4731	10.2183	intergenic	-
1	242837325	242837501	3.73132	3.74115	4.59266	intergenic	-
1	242978743	242979226	2.87747	4.58749	3.14455	utr_3	ENSSSCG00000005217
1	242999114	242999300	3.90114	5.25194	3.79261	intron	ENSSSCG00000005217
1	243189332	243189591	3.46896	5.10444	3.05363	intergenic	-
1	243189776	243190598	5.176	5.18851	5.47505	CDS	ENSSSCG00000005220
1	247301922	247302163	2.81144	1.80629	2.37311	CDS	ENSSSCG00000005235
1	247885814	247886096	6.26822	5.3898	6.37598	intergenic	-
1	248523603	248523925	10.8941	10.0549	15.7606	intergenic	ENSSSCG00000005245
1	248524463	248524765	9.27513	8.82943	8.01848	TSS	ENSSSCG00000005245
1	248825765	248826025	3.80266	4.17893	3.86327	intron	ENSSSCG00000005247
1	248825765	248826025	3.80266	4.17893	3.86327	Stop	ENSSSCG00000005247
1	248825765	248826025	3.80266	4.17893	3.86327	Stop	ENSSSCG00000029150
1	248848348	248848672	4.08036	4.41108	3.60382	CDS	ENSSSCG00000005247
1	248882991	248883166	3.29822	3.51923	3.46893	Stop	ENSSSCG00000005247
1	248944747	248944947	9.2064	4.75569	4.72447	intron	ENSSSCG00000005249
1	249498716	249498990	12.1809	16.4645	13.0374	Stop	ENSSSCG00000005252
1	250030099	250030985	4.61262	4.52139	5.19619	utr_5	ENSSSCG00000021646
1	250053996	250054276	3.97012	4.60592	4.94405	Stop	ENSSSCG00000021646
1	251551753	251551970	10.1445	21.8762	19.3897	CDS	ENSSSCG00000005260
1	251726251	251726494	4.21084	7.18015	5.37287	CDS	ENSSSCG00000021802
1	251758858	251759146	6.18988	4.28013	5.53534	TSS	ENSSSCG00000021802
1	252239945	252240160	2.14205	2.24417	2.03605	utr_5	ENSSSCG00000005264
1	252240717	252240911	10.008	4.43865	7.23853	intergenic	-
1	254943830	254944371	4.49508	3.72125	3.93606	TSS	ENSSSCG00000025640
1	254991139	254991396	12.7601	10.1622	14.5109	CDS	ENSSSCG00000005271
1	255040323	255040514	2.06359	2.66318	2.01982	TSS	ENSSSCG00000005273
1	257571819	257572070	5.87683	4.52084	4.75843	intergenic	-
1	261897907	261898896	5.56748	5.7177	5.95951	intergenic	-
1	263424105	263424312	6.16543	7.98128	8.20816	CDS	ENSSSCG00000005301
1	264066225	264066467	6.13375	4.14424	5.41986	intergenic	-
1	264070521	264070929	2.9649	4.01856	3.06066	Stop	ENSSSCG00000005310
1	264134530	264134725	3.52474	4.0963	3.16744	TSS	ENSSSCG00000005316
1	264175570	264175909	11.094	8.42105	12.0119	intergenic	-
1	264192609	264192859	2.6469	3.61044	4.95619	TSS	ENSSSCG00000005319
1	264234043	264234224	14.2423	9.84431	15.3275	utr_5	ENSSSCG00000005322
1	264234884	264235115	6.24136	12.1024	24.1219	CDS	ENSSSCG00000005322
1	264392739	264393122	3.41065	4.85852	5.92333	intergenic	-
1	264674082	264674281	5.09357	7.81589	4.03995	Stop	ENSSSCG00000005338
1	266103962	266104175	9.9924	7.95153	11.8725	intergenic	-
1	266105910	266106124	2.81792	3.87416	3.31677	intron	ENSSSCG00000005347
1	266106351	266106550	3.37916	6.30922	5.77375	intron	ENSSSCG00000005347
1	266124780	266124982	2.33208	2.81611	3.2646	Stop	ENSSSCG00000005347
1	266262366	266262586	3.10984	3.46739	4.53507	utr_5	ENSSSCG00000005350
1	266475810	266476026	3.11388	3.26472	2.91398	CDS	ENSSSCG00000005355
1	266502625	266502839	9.24814	5.98299	7.68356	TSS	ENSSSCG00000005356
1	266612046	266612326	5.20969	12.169	9.21324	Stop	ENSSSCG00000005356
1	266626287	266626718	11.4373	11.4229	11.5985	intergenic	-
1	266866078	266866271	3.94198	4.08197	5.95814	intergenic	-
1	266866739	266867015	8.67613	7.31426	9.14374	intergenic	-
1	267166543	267166751	3.07947	4.17125	3.7523	CDS	ENSSSCG00000005361
1	267167230	267167903	5.47594	6.03695	6.66434	Stop	ENSSSCG00000005361
1	267258002	267258207	1.89575	2.92388	2.84645	intron	ENSSSCG00000025655
1	267393696	267393910	4.15211	3.02251	7.73911	CDS	ENSSSCG00000005364
1	267880010	267880194	3.59229	6.18241	3.42422	CDS	ENSSSCG00000005370
1	268051444	268051651	6.74508	7.31071	6.06559	TSS	ENSSSCG00000005373
1	269211218	269212060	7.55923	8.92485	8.21342	CDS	ENSSSCG00000005383
1	269215428	269215642	2.75672	1.91737	2.84662	CDS	ENSSSCG00000005383
1	270000281	270000657	11.4333	19.4191	14.8349	Stop	ENSSSCG00000005386
1	270382919	270383207	6.34325	8.56023	16.6606	CDS	ENSSSCG00000005388
1	271586934	271587570	3.25749	4.3324	4.13721	Stop	ENSSSCG00000005398
1	271590728	271590928	1.71704	1.54982	1.35771	CDS	ENSSSCG00000005398
1	275504554	275505097	11.1476	10.7399	13.1614	Stop	ENSSSCG00000026173
1	276190803	276191025	5.41196	4.71213	8.9474	intergenic	-
1	278901689	278901941	3.12108	2.21216	2.57297	utr_5	ENSSSCG00000005436
1	278945686	278945868	2.15048	2.53887	3.0276	Stop	ENSSSCG00000005436
1	279059096	279059309	12.908	29.6756	18.7881	CDS	ENSSSCG00000005437
1	280616263	280616567	2.93325	2.78608	4.99345	intergenic	ENSSSCG00000005444
1	280912991	280913220	2.97942	3.11974	3.16225	intergenic	-
1	281918796	281919065	8.74525	10.1455	10.5314	nc_exon	ENSSSCG00000005451
1	281949046	281949507	14.1111	17.8947	23.3118	intergenic	-
1	281951353	281951624	2.06205	7.86276	4.66624	intergenic	-
1	283177321	283177628	9.49372	4.96706	10.9564	intergenic	-
1	283177912	283178159	4.48395	1.21534	6.25662	intergenic	-
1	283224626	283224826	4.98481	4.17925	4.22133	Stop	ENSSSCG00000005460
1	283440533	283440793	12.4514	7.8685	8.94965	intergenic	-
1	283777430	283777632	6.88691	5.18208	6.97043	Stop	ENSSSCG00000005466
1	284184923	284185158	3.63158	2.93796	2.83377	utr_3	ENSSSCG00000026194
1	284186820	284187077	3.92565	10.5078	7.23544	Stop	ENSSSCG00000026194
1	284234558	284234796	15.015	11.0967	7.47529	utr_5	ENSSSCG00000005471
1	284359000	284359233	17.063	17.0221	17.6228	intergenic	-
1	284607227	284607552	4.44466	6.26439	6.96994	CDS	ENSSSCG00000005477
1	284676382	284676711	1.79418	2.83548	2.48465	Stop	ENSSSCG00000024648
1	284829898	284830236	4.23254	4.75572	5.22044	Stop	ENSSSCG00000005478
1	284950081	284950337	27.5851	19.1179	16.9733	intron	ENSSSCG00000005480
1	284990162	284990400	3.48412	4.18501	5.1301	CDS	ENSSSCG00000005480
1	284990546	284990716	21.1986	21.4006	13.0158	CDS	ENSSSCG00000005480
1	285698998	285699182	16.2258	13.3159	23.4938	CDS	ENSSSCG00000005484
1	285699580	285700086	11.5915	14.1419	10.9166	Stop	ENSSSCG00000005484
1	285701989	285702200	4.89736	7.90634	7.17087	intergenic	-
1	285703157	285703399	5.65338	14.613	7.03557	intergenic	-
1	285703708	285704014	6.97124	11.3309	8.92976	intergenic	-
1	286260780	286260970	2.90613	27.7559	13.0158	intergenic	-
1	286781254	286781869	21.6783	18.0012	30.1281	CDS	ENSSSCG00000005494
1	288460818	288461049	8.43043	9.82844	11.7126	CDS	ENSSSCG00000005501
1	289784533	289784711	9.93464	7.83291	8.88237	CDS	ENSSSCG00000005503
1	289785082	289785314	6.2966	9.1392	5.63321	Stop	ENSSSCG00000005503
1	292737835	292738072	11.7537	14.8106	16.3326	CDS	ENSSSCG00000005506
1	292827548	292827700	4.72245	8.44136	8.11043	CDS	ENSSSCG00000005506
1	292891699	292892086	6.77451	7.39016	8.98866	Stop	ENSSSCG00000021318
1	292927726	292927957	5.42578	6.32229	6.94763	intergenic	-
1	292950264	292950623	3.25994	2.39687	2.36351	intergenic	-
1	293381498	293381729	13.9925	15.2182	30.4508	intergenic	-
1	293630157	293630533	3.13467	3.08477	3.9475	utr_3	ENSSSCG00000005518
1	293631516	293631758	4.79334	4.70691	5.57569	CDS	ENSSSCG00000005518
1	294001362	294001829	13.7283	14.4845	15.212	intergenic	ENSSSCG00000005524
1	294010924	294011178	4.41118	6.09593	4.35093	CDS	ENSSSCG00000005524
1	294559543	294559797	1.70034	1.59942	1.88962	TSS	ENSSSCG00000005528
1	297214717	297214949	4.84739	5.23128	6.31899	CDS	ENSSSCG00000005574
1	297292243	297292504	21.5658	24.3016	30.8783	CDS	ENSSSCG00000005576
1	297476966	297477226	1.85194	2.56628	1.68436	Stop	ENSSSCG00000023197
1	297483176	297483391	9.55533	8.59195	10.3935	intergenic	-
1	297714116	297714317	5.89952	4.63162	6.08576	utr_5	ENSSSCG00000005582
1	298708419	298708733	2.76669	5.13615	5.43657	Stop	ENSSSCG00000005586
1	298728124	298728331	3.19114	2.05569	2.16296	intergenic	ENSSSCG00000005586
1	298940678	298940887	4.68359	2.93452	3.91177	Stop	ENSSSCG00000005587
1	299470751	299470950	3.77297	2.45814	2.76953	TSS	ENSSSCG00000005596
1	299478471	299478729	5.892	8.56024	7.87337	Stop	ENSSSCG00000005596
1	299840592	299840834	3.84792	3.33246	3.81093	intron	ENSSSCG00000005602
1	299840592	299840834	3.84792	3.33246	3.81093	Stop	ENSSSCG00000029141
1	299984397	299984632	7.00943	5.80196	6.90141	intron	ENSSSCG00000028891
1	300175979	300176200	4.82402	4.01709	4.88325	TSS	ENSSSCG00000029169
1	301002203	301002767	11.2919	10.8728	9.03429	intergenic	-
1	301003621	301003983	16.0413	12.0081	12.9241	intergenic	-
1	301921613	301921789	10.1008	8.28849	10.0122	utr_3	ENSSSCG00000005614
1	301922253	301922776	4.46453	6.54197	5.78968	Stop	ENSSSCG00000005614
1	301974842	301975046	29.3842	9.03582	10.3775	intergenic	-
1	302142156	302142397	9.2084	6.88624	10.0322	intergenic	-
1	302142617	302143089	13.4056	11.115	9.5757	TSS	ENSSSCG00000005621
1	302206900	302207125	7.34604	6.63531	10.6177	Stop	ENSSSCG00000005621
1	302232210	302232757	5.46795	6.28865	5.87121	utr_3	ENSSSCG00000005625
1	302265913	302266116	3.61339	3.91398	3.9575	TSS	ENSSSCG00000005625
1	302293934	302294138	5.2928	5.40247	4.08684	intergenic	-
1	302304886	302305217	4.19774	4.60146	3.75763	intron	ENSSSCG00000005623
1	302386756	302386992	3.6872	3.78243	4.48234	intergenic	-
1	302387216	302387444	8.34024	4.57956	9.75385	intergenic	-
1	302448497	302448739	44.6592	29.8023	67.7175	intergenic	-
1	302550032	302550244	5.86236	5.46905	7.27542	intron	ENSSSCG00000005636
1	302561883	302562146	3.79967	3.10706	3.06697	CDS	ENSSSCG00000005636
1	302565634	302565854	7.8433	10.5698	10.2276	Stop	ENSSSCG00000005636
1	302566863	302567124	2.31554	1.46224	2.31219	utr_3	ENSSSCG00000005636
1	302576541	302576840	6.43424	4.91809	5.2826	intron	ENSSSCG00000022655
1	302581056	302581273	8.82381	3.50661	3.82327	TSS	ENSSSCG00000022655
1	302606516	302606741	6.1326	8.67914	11.7259	intergenic	ENSSSCG00000022295
1	302632104	302632322	18.6566	12.7725	24.1447	intergenic	-
1	302736514	302736922	2.78205	3.41776	4.46106	utr_3	ENSSSCG00000005645
1	302758526	302758803	3.34556	5.88893	6.18411	intron	ENSSSCG00000005645
1	302758526	302758803	3.34556	5.88893	6.18411	Stop	ENSSSCG00000005646
1	302778511	302778736	4.39451	3.21924	2.77825	intron	ENSSSCG00000005645
1	302778511	302778736	4.39451	3.21924	2.77825	utr_3	ENSSSCG00000005648
1	302804139	302804407	8.77026	5.95783	6.96792	intron	ENSSSCG00000005645
1	302804139	302804407	8.77026	5.95783	6.96792	utr_3	ENSSSCG00000005649
1	303105146	303105487	11.4598	17.8415	13.0546	utr_3	ENSSSCG00000005657
1	303105146	303105487	11.4598	17.8415	13.0546	utr_3	ENSSSCG00000005658
1	303166049	303166300	2.80878	3.45703	3.62331	intergenic	-
1	303170181	303170393	4.68679	3.97311	3.61773	CDS	ENSSSCG00000005661
1	303173707	303173822	3.01712	4.1533	4.62418	intron	ENSSSCG00000005662
1	303173707	303173822	3.01712	4.1533	4.62418	Stop	ENSSSCG00000005661
1	303245064	303245266	1.96079	2.61152	2.61982	CDS	ENSSSCG00000005664
1	303245530	303245736	5.0424	5.28248	4.9718	CDS	ENSSSCG00000005664
1	303252805	303253389	13.1544	15.016	14.8165	Stop	ENSSSCG00000005664
1	303254145	303254364	3.37318	5.24059	3.71963	utr_3	ENSSSCG00000005664
1	303273652	303273983	14.8978	31.3495	29.1194	Stop	ENSSSCG00000005666
1	303274481	303274700	8.67532	14.7427	11.2679	CDS	ENSSSCG00000005666
1	303330077	303330294	9.90861	7.37133	5.29668	utr_3	ENSSSCG00000005668
1	303348255	303348456	10.0635	11.6401	10.6896	TSS	ENSSSCG00000005668
1	303378715	303379487	6.32839	6.51898	6.97568	utr_3	ENSSSCG00000005669
1	303398727	303399115	6.1406	5.14166	6.47271	utr_3	ENSSSCG00000005670
1	303417267	303417527	3.30188	2.88167	2.37069	TSS	ENSSSCG00000005671
1	303418090	303418290	8.04566	7.3	5.76857	utr_5	ENSSSCG00000005672
1	303446367	303446773	6.90108	7.04962	7.05128	utr_3	ENSSSCG00000005672
1	303446923	303447123	3.18162	3.26954	3.01319	utr_3	ENSSSCG00000005672
1	303470162	303470963	20.4718	21.6274	21.8468	nc_exon	ENSSSCG00000005673
1	303695599	303696016	9.58179	8.75766	7.457	Stop	ENSSSCG00000005678
1	303697034	303697759	8.15974	10.4692	9.88278	Stop	ENSSSCG00000005679
1	303770379	303770609	22.4315	15.5035	19.4455	Stop	ENSSSCG00000005680
1	303864162	303864412	2.10706	1.70254	2.24322	TSS	ENSSSCG00000005683
1	303865049	303865232	4.68747	6.30755	4.01027	intron	ENSSSCG00000005683
1	303869023	303869719	7.6722	10.4817	8.41937	intergenic	ENSSSCG00000005683
1	303873031	303873441	4.75602	6.97165	5.08836	Stop	ENSSSCG00000025964
1	303876133	303876344	7.4695	7.84689	7.57676	intron	ENSSSCG00000025964
1	303922217	303922428	13.9811	11.2134	12.0924	CDS	ENSSSCG00000024341
1	303934959	303935215	7.89938	9.08866	7.12351	utr_3	ENSSSCG00000024341
1	304435199	304435411	12.8031	11.2623	18.0287	intron	ENSSSCG00000005699
1	304467299	304467686	13.4328	9.51139	7.18214	intron	ENSSSCG00000005701
1	304476336	304476543	22.4579	9.41128	14.0711	intron	ENSSSCG00000005701
1	304478987	304479285	24.062	15.2182	8.59151	intron	ENSSSCG00000005701
1	304479580	304479780	4.94733	7.09028	5.36043	intron	ENSSSCG00000005701
1	304480128	304480386	17.2753	7.43927	8.09092	intron	ENSSSCG00000005701
1	304481184	304481382	16.3066	13.3159	3.81093	intron	ENSSSCG00000005701
1	304482752	304482954	2.69355	2.88224	2.09714	intron	ENSSSCG00000005701
1	304487211	304487507	5.27994	3.31259	3.60573	intron	ENSSSCG00000005701
1	304506162	304506394	5.6544	3.48752	5.52794	intron	ENSSSCG00000005701
1	304506955	304507130	6.80033	6.86179	3.95751	intron	ENSSSCG00000005701
1	304575285	304575483	10.7681	10.5946	9.57166	TSS	ENSSSCG00000005702
1	304679985	304680206	3.24824	3.33831	3.24417	intergenic	-
1	304685618	304685930	7.9757	11.6618	12.5108	intergenic	ENSSSCG00000005706
1	304826254	304826822	4.74743	4.39123	3.90443	CDS	ENSSSCG00000005706
1	304827037	304828188	4.6502	5.10942	5.14394	Stop	ENSSSCG00000005706
1	305207956	305208133	2.7885	5.00933	6.44927	CDS	ENSSSCG00000005711
1	305417165	305418709	7.08837	5.99767	7.65554	CDS	ENSSSCG00000005715
1	305435193	305435437	2.53064	3.20851	4.70763	Stop	ENSSSCG00000005715
1	305435750	305436198	6.74542	8.13832	8.96124	utr_3	ENSSSCG00000005715
1	305438527	305438899	3.13771	3.91812	4.57312	utr_3	ENSSSCG00000005715
1	305456275	305456431	2.15611	2.16168	1.82301	utr_3	ENSSSCG00000005717
1	305457588	305457785	3.8759	2.81266	2.68055	Stop	ENSSSCG00000005717
1	305461904	305462167	23.7434	12.9438	18.1954	CDS	ENSSSCG00000005717
1	305502418	305502793	5.92545	5.36864	5.52793	utr_3	ENSSSCG00000005719
1	305503847	305504063	2.63164	2.06769	2.97192	utr_3	ENSSSCG00000005719
1	305504236	305504486	4.63908	4.55661	4.46563	Stop	ENSSSCG00000005719
1	305632920	305633148	14.326	10.843	14.9506	TSS	ENSSSCG00000005719
1	305733832	305734030	5.09725	4.2369	5.96958	Stop	ENSSSCG00000005720
1	306154461	306155017	11.6487	14.0887	14.3929	intergenic	ENSSSCG00000005724
1	306234753	306235078	7.85435	9.84888	5.75895	CDS	ENSSSCG00000005725
1	306417291	306417671	30.806	42.5389	25.5641	Stop	ENSSSCG00000005729
1	306494205	306494399	10.8442	11.1419	9.6739	CDS	ENSSSCG00000005731
1	306495562	306495783	4.72245	3.5328	3.90577	CDS	ENSSSCG00000005731
1	306712837	306713261	6.93878	9.64728	7.84343	Stop	ENSSSCG00000005738
1	306730375	306730562	8.23221	4.83282	9.82045	Stop	ENSSSCG00000005739
1	306791944	306792331	3.48491	2.58166	2.41848	intron	ENSSSCG00000005739
1	306795402	306796030	14.98	16.6544	17.5986	intron	ENSSSCG00000005733
1	306795402	306796030	14.98	16.6544	17.5986	intron	ENSSSCG00000005739
1	306795402	306796030	14.98	16.6544	17.5986	Stop	ENSSSCG00000005733
1	306825182	306825469	13.0215	12.5686	12.8056	intron	ENSSSCG00000005739
1	306985626	306986478	4.91484	6.35553	6.10024	utr_3	ENSSSCG00000023173
1	306993569	306993741	1.81821	2.42844	1.50239	CDS	ENSSSCG00000023173
1	306995477	306995717	7.26632	6.86363	8.21267	utr_5	ENSSSCG00000023173
1	307039141	307039351	5.95707	4.69498	6.71577	intergenic	ENSSSCG00000021113
1	307039875	307040254	5.17451	5.28867	5.74332	intergenic	-
1	307093733	307093931	8.50893	3.93666	6.24193	intergenic	-
1	307111081	307111284	4.62482	5.17844	4.2018	CDS	ENSSSCG00000026425
1	307112681	307112892	3.29306	3.3775	2.57125	CDS	ENSSSCG00000026425
1	307123812	307124013	3.55784	2.40477	2.74558	CDS	ENSSSCG00000026425
1	307127362	307127760	4.87479	3.2256	3.95752	intron	ENSSSCG00000026425
1	307128723	307128958	3.15401	4.59718	3.76351	intergenic	ENSSSCG00000026425
1	307204229	307204461	7.75094	8.16739	7.90244	utr_3	ENSSSCG00000005740
1	307210436	307210687	2.22299	2.42108	2.21344	CDS	ENSSSCG00000005740
1	307239656	307239810	9.44491	10.1772	6.15612	intron	ENSSSCG00000005740
1	307258388	307258689	3.37701	4.07335	3.83912	intron	ENSSSCG00000005740
1	307258839	307259041	8.14557	2.86954	3.21336	intron	ENSSSCG00000005740
1	307260039	307260595	7.69585	4.901	4.19735	intron	ENSSSCG00000005740
1	307264515	307264827	6.95344	4.92489	7.54688	CDS	ENSSSCG00000005740
1	307276120	307276361	7.92153	6.55229	9.49801	utr_3	ENSSSCG00000005743
1	307276641	307277031	12.8481	8.33945	8.80963	utr_3	ENSSSCG00000005743
1	307277780	307278103	4.22649	3.93425	3.33175	utr_3	ENSSSCG00000005743
1	307448655	307449097	11.8436	7.6264	10.9845	utr_5	ENSSSCG00000005743
1	307475771	307476023	3.52696	2.60683	4.4256	utr_3	ENSSSCG00000005749
1	307477753	307478170	6.51754	6.13611	5.98453	utr_3	ENSSSCG00000005749
1	307478457	307478653	1.62185	1.198	1.84795	Stop	ENSSSCG00000005749
1	307481921	307482195	5.43738	3.17313	3.89469	CDS	ENSSSCG00000005749
1	307484665	307484925	3.85272	2.67101	2.80428	CDS	ENSSSCG00000005749
1	307490975	307491065	6.39376	4.12162	4.55427	CDS	ENSSSCG00000005749
1	307496060	307496239	4.71754	5.42502	4.22882	TSS	ENSSSCG00000005749
1	307549169	307549371	3.59017	2.75965	2.5127	Stop	ENSSSCG00000024912
1	307549985	307550203	11.7436	7.69558	9.92517	utr_3	ENSSSCG00000024912
1	307851234	307851509	12.4794	9.80405	11.5916	utr_5	ENSSSCG00000005750
1	308173950	308174208	3.90345	3.12746	3.18186	Stop	ENSSSCG00000005751
1	308175670	308175888	5.29811	6.54197	7.22713	intergenic	-
1	308197290	308197498	3.37465	3.49246	4.16922	CDS	ENSSSCG00000023333
1	308197761	308198021	5.68513	3.57827	3.91307	CDS	ENSSSCG00000023333
1	308352185	308352747	29.8506	29.1336	23.8452	Stop	ENSSSCG00000029715
1	308620457	308620665	8.29553	11.6731	13.4316	intergenic	-
1	308621621	308621856	5.60789	5.63889	4.60662	CDS	ENSSSCG00000005761
1	308622226	308624269	10.8612	13.5369	10.3682	CDS	ENSSSCG00000005761
1	308636056	308636265	8.39547	5.23126	6.53303	intron	ENSSSCG00000005759
1	308638374	308638623	5.6706	5.25446	7.93435	Stop	ENSSSCG00000005759
1	308853115	308853430	9.32609	11.6401	12.692	Stop	ENSSSCG00000005753
1	308859625	308860081	6.91179	7.59009	10.6484	CDS	ENSSSCG00000005753
1	308860193	308860580	11.2351	14.8483	9.00837	CDS	ENSSSCG00000005753
1	308860912	308861453	18.1902	12.6977	14.3166	CDS	ENSSSCG00000005753
1	309952334	309952546	15.2168	15.8976	8.44268	CDS	ENSSSCG00000023376
1	310005067	310005699	11.089	16.1004	12.9356	CDS	ENSSSCG00000005774
1	310007146	310007461	4.40762	7.92614	5.81293	CDS	ENSSSCG00000005774
1	310068986	310069388	6.81833	9.20537	8.83701	Stop	ENSSSCG00000005773
1	311022224	311022416	4.23811	2.50543	3.14272	CDS	ENSSSCG00000005781
1	311333817	311334113	5.26998	3.92445	5.32599	CDS	ENSSSCG00000028791
1	311558910	311559556	30.6825	18.1566	16.2697	CDS	ENSSSCG00000005787
1	311578575	311578822	8.15933	3.67602	5.91068	Stop	ENSSSCG00000005787
1	311581763	311581967	14.5835	8.16396	9.079	Stop	ENSSSCG00000005787
1	311644656	311644885	6.13651	5.29613	6.0967	TSS	ENSSSCG00000005786
1	311675803	311676016	10.4391	20.3306	30.2528	intergenic	-
1	311678270	311678492	15.3217	59.9218	27.2628	intergenic	-
1	313730012	313730228	40.0283	29.4853	67.1309	intron	ENSSSCG00000005828
1	313734198	313734397	3.71965	2.16337	2.81248	CDS	ENSSSCG00000005828
1	313734762	313735180	8.74527	9.00939	8.45346	intron	ENSSSCG00000005828
1	313736843	313737182	1.85758	2.31331	2.0846	utr_3	ENSSSCG00000005828
1	313757015	313757203	12.8264	18.0716	27.8909	intergenic	-
1	313758231	313758571	3.3822	3.30749	2.93594	Stop	ENSSSCG00000005840
1	313759841	313760033	31.3256	18.8869	27.9957	intergenic	-
1	313763846	313764254	9.38189	8.34671	9.84563	intergenic	-
1	313772458	313772828	4.82467	2.57367	3.47504	Stop	ENSSSCG00000005838
1	313774831	313775151	6.27328	5.90499	5.37007	CDS	ENSSSCG00000005838
1	313807204	313807573	2.77061	2.49795	2.02702	CDS	ENSSSCG00000005833
1	313849009	313849235	3.21477	2.21355	2.17691	intergenic	-
1	313852117	313852371	39.8785	9.08866	13.2796	intergenic	-
1	313854067	313854373	5.43566	6.88955	4.5512	intergenic	-
1	313854680	313855087	12.9336	13.7122	14.3174	intergenic	ENSSSCG00000005837
1	313890679	313890873	2.992	3.59848	3.90996	intergenic	-
1	313920900	313921443	19.741	12.5729	15.488	Stop	ENSSSCG00000005841
1	313982107	313982320	8.67943	5.77476	5.69384	intergenic	-
1	314013165	314013296	10.1795	2.04861	3.81093	CDS	ENSSSCG00000005853
1	314112255	314112516	5.36641	5.68472	6.62966	Stop	ENSSSCG00000005845
1	314112744	314113210	9.67614	9.95897	11.5891	CDS	ENSSSCG00000005845
1	314117532	314117749	4.4426	4.85973	6.49115	Stop	ENSSSCG00000005846
1	314125576	314125965	29.6513	33.4597	25.9227	utr_5	ENSSSCG00000005846
1	314136288	314136520	6.02331	5.15201	4.65979	CDS	ENSSSCG00000005849
1	314137556	314137753	4.25021	3.85461	3.30439	CDS	ENSSSCG00000005849
1	314164209	314164449	5.03996	3.83152	4.235	intergenic	-
2	60035	60302	22.9709	19.7022	18.1166	intron	ENSSSCG00000012836
2	123993	124233	3.01996	1.9262	2.70674	utr_3	ENSSSCG00000012838
2	145757	145988	4.39913	3.12516	3.29791	CDS	ENSSSCG00000012840
2	168658	168883	18.3174	27.3717	32.9792	utr_5	ENSSSCG00000012843
2	181643	181862	4.36452	3.97081	4.06463	Stop	ENSSSCG00000012844
2	193783	194212	27.7592	16.2695	17.1301	intron	ENSSSCG00000012846
2	198704	199195	9.05228	7.17097	7.60856	utr_3	ENSSSCG00000012846
2	199847	200038	9.46632	5.67757	7.25543	utr_3	ENSSSCG00000012846
2	222139	222373	5.60236	3.84531	4.69926	Stop	ENSSSCG00000012848
2	240589	241183	13.9767	13.9654	18.1503	utr_3	ENSSSCG00000012849
2	243649	243924	15.5205	8.43754	12.4881	intron	ENSSSCG00000012849
2	246482	246850	6.23644	4.28972	5.15941	TSS	ENSSSCG00000012850
2	269154	269364	3.25877	3.0748	3.1023	Stop	ENSSSCG00000012850
2	297759	297989	7.34604	5.32638	6.5079	Stop	ENSSSCG00000012852
2	304800	306523	6.07344	5.20211	5.11226	CDS	ENSSSCG00000029723
2	306971	307367	5.03232	5.74526	5.73059	CDS	ENSSSCG00000029723
2	333707	333927	13.5487	17.3319	14.3245	TSS	ENSSSCG00000029723
2	343032	343361	5.06013	5.11905	4.05213	CDS	ENSSSCG00000012854
2	427950	428199	2.5088	2.41998	3.58374	intergenic	-
2	439950	440211	7.33409	5.82935	6.34523	utr_3	ENSSSCG00000012856
2	851384	851815	2.82352	3.08057	3.12174	intergenic	ENSSSCG00000021181
2	1237527	1237825	7.06618	12.9231	12.6853	intergenic	-
2	1238105	1238499	5.38625	5.81781	4.73403	intergenic	-
2	1388805	1389036	4.40351	3.00136	0.879446	Stop	ENSSSCG00000030888
2	1480196	1480498	6.17104	4.416	4.50957	intergenic	-
2	1489918	1490162	2.58009	1.80661	2.6832	intergenic	-
2	1490364	1490551	5.50743	4.48527	5.33839	intergenic	-
2	1493826	1494037	3.39145	2.58166	2.78491	intergenic	-
2	1565118	1565566	4.73149	3.24627	3.77923	Stop	ENSSSCG00000029328
2	1567473	1567895	5.1589	4.49298	4.93867	TSS	ENSSSCG00000029328
2	2725653	2726088	6.60376	5.21311	6.44555	Stop	ENSSSCG00000012875
2	2750928	2751145	2.32086	3.77738	2.79353	intergenic	-
2	2755613	2755834	3.50556	4.90587	4.63175	CDS	ENSSSCG00000012878
2	2785316	2785532	6.70472	17.571	14.5636	Stop	ENSSSCG00000012879
2	2815186	2815470	10.6109	11.8439	7.20987	intergenic	-
2	2872308	2872597	4.59531	5.44333	4.17846	utr_3	ENSSSCG00000012880
2	2974966	2975260	8.8074	6.76988	6.80105	utr_3	ENSSSCG00000012884
2	3213494	3213772	2.55499	2.11954	1.8739	TSS	ENSSSCG00000012885
2	3254033	3254225	9.11696	5.70683	5.86297	intron	ENSSSCG00000012886
2	3368710	3368913	2.87835	2.46151	2.41057	intergenic	-
2	3401127	3401384	3.04901	2.3153	2.65033	intergenic	-
2	3403343	3403625	2.77676	2.22064	2.24607	intergenic	-
2	3416355	3416869	3.64134	2.91793	3.45482	TSS	ENSSSCG00000012889
2	3473288	3474100	6.64562	6.92873	6.94157	intergenic	ENSSSCG00000012889
2	3550011	3550623	7.23359	6.93839	8.97409	Stop	ENSSSCG00000012893
2	3601966	3602241	3.05522	2.28019	2.45115	CDS	ENSSSCG00000012896
2	3744114	3744398	3.7889	3.91672	3.99068	utr_5	ENSSSCG00000012902
2	3803432	3803755	1.85669	1.6392	1.40194	CDS	ENSSSCG00000012920
2	3806442	3807075	8.53467	8.86498	10.4068	Stop	ENSSSCG00000012909
2	3807356	3807612	3.71338	2.97084	2.83767	Stop	ENSSSCG00000012910
2	3816288	3816994	4.57251	5.53112	5.35363	CDS	ENSSSCG00000012911
2	3817886	3818141	6.97874	3.5892	3.71932	CDS	ENSSSCG00000012911
2	3838701	3838901	6.17314	4.83402	4.78698	TSS	ENSSSCG00000012913
2	3838701	3838901	6.17314	4.83402	4.78698	utr_3	ENSSSCG00000012914
2	3944801	3945015	2.65062	2.82723	2.30009	intron	ENSSSCG00000012916
2	3946116	3946380	4.75458	5.73673	5.72994	utr_3	ENSSSCG00000012916
2	3969112	3969346	4.64081	2.49674	3.60289	Stop	ENSSSCG00000027956
2	4021692	4021904	3.6638	5.58796	6.36065	utr_3	ENSSSCG00000029637
2	4023955	4024171	2.94649	3.23193	4.36425	Stop	ENSSSCG00000029637
2	4028705	4028982	6.86432	5.37216	5.41197	CDS	ENSSSCG00000029637
2	4047002	4047233	11.6363	12.7637	15.1197	CDS	ENSSSCG00000029637
2	4238220	4238420	2.98901	2.35282	2.44418	Stop	ENSSSCG00000022726
2	4407777	4407977	12.893	12.3648	21.1067	utr_3	ENSSSCG00000024837
2	4448239	4448740	12.7736	8.11441	9.39799	intergenic	-
2	4578094	4578411	4.09342	3.37711	3.15412	CDS	ENSSSCG00000012925
2	4578357	4578665	2.32809	2.18435	1.83406	CDS	ENSSSCG00000012925
2	4609531	4609762	2.36092	2.41596	2.4206	Stop	ENSSSCG00000012926
2	4615076	4615412	20.02	13.9953	14.68	intergenic	ENSSSCG00000029902
2	5120403	5120571	4.16069	4.26572	5.75408	CDS	ENSSSCG00000012940
2	5125983	5126176	5.87278	6.76774	4.52997	intron	ENSSSCG00000012939
2	5126381	5126676	8.93769	4.77103	7.75513	intron	ENSSSCG00000012939
2	5149212	5149409	18.8898	29.4853	51.6673	Stop	ENSSSCG00000029949
2	5349088	5349287	9.93464	7.13354	10.0257	intergenic	-
2	5461380	5461669	16.2104	13.9148	14.716	CDS	ENSSSCG00000012963
2	5470380	5470877	13.416	11.9592	13.1917	CDS	ENSSSCG00000012963
2	5471920	5472236	3.85885	3.17584	3.8272	CDS	ENSSSCG00000012963
2	5476585	5477053	16.4974	13.3417	14.7363	CDS	ENSSSCG00000012963
2	5514215	5514557	13.0572	7.13353	7.53182	CDS	ENSSSCG00000012965
2	5515387	5515758	11.9449	12.7623	12.4099	intergenic	ENSSSCG00000012965
2	5515939	5516148	11.9819	11.9553	14.231	TSS	ENSSSCG00000012966
2	5516771	5516949	2.91103	3.45472	3.40431	CDS	ENSSSCG00000012966
2	5517362	5517739	2.64051	3.60319	3.05595	Stop	ENSSSCG00000012966
2	5540785	5541744	13.7906	14.7121	16.591	CDS	ENSSSCG00000012968
2	5540785	5541744	13.7906	14.7121	16.591	utr_3	ENSSSCG00000012967
2	5653147	5653752	9.66584	14.9465	10.3272	CDS	ENSSSCG00000012978
2	5653902	5654124	8.12171	9.76499	7.79506	CDS	ENSSSCG00000012978
2	5654787	5655342	9.24238	12.5599	15.4303	Stop	ENSSSCG00000012978
2	5667530	5667873	8.23336	7.44512	7.70861	Stop	ENSSSCG00000012979
2	5667530	5667873	8.23336	7.44512	7.70861	utr_3	ENSSSCG00000012980
2	5667530	5667873	8.23336	7.44512	7.70861	utr_3	ENSSSCG00000012979
2	5668603	5668847	2.57111	2.86983	3.1688	Stop	ENSSSCG00000012980
2	5699398	5699848	2.62358	2.80018	3.27688	intergenic	-
2	5707710	5708116	2.24037	2.29357	2.75382	nc_exon	ENSSSCG00000012981
2	5762255	5762565	4.57012	4.65003	4.53402	CDS	ENSSSCG00000012982
2	5767652	5767985	5.69693	5.39499	6.05177	CDS	ENSSSCG00000012982
2	5771840	5772067	3.72548	5.18068	6.00221	Stop	ENSSSCG00000012983
2	5788870	5789698	7.10386	7.20384	7.91501	CDS	ENSSSCG00000012983
2	5791570	5791763	4.8274	3.5328	3.95751	intergenic	ENSSSCG00000012983
2	5808003	5808185	3.35938	2.98905	3.24872	intergenic	-
2	5830475	5830717	6.23606	3.66123	5.61711	TSS	ENSSSCG00000012984
2	5831591	5831800	2.92783	2.42907	2.3762	CDS	ENSSSCG00000012984
2	5843595	5843844	6.86717	5.6044	6.45194	Stop	ENSSSCG00000012984
2	5843595	5843844	6.86717	5.6044	6.45194	utr_3	ENSSSCG00000012985
2	5865173	5865488	6.14354	8.34547	8.18152	utr_5	ENSSSCG00000012988
2	5874034	5874318	10.4943	6.56042	5.8716	CDS	ENSSSCG00000012988
2	5880960	5881193	3.56172	3.81875	3.40052	intergenic	-
2	5886812	5887016	1.75592	3.09701	2.18753	intergenic	-
2	5905112	5905419	11.068	7.39912	11.7259	utr_3	ENSSSCG00000020737
2	5931450	5931651	9.59483	7.54117	12.2536	intergenic	-
2	5943067	5943499	8.16859	8.71953	7.9935	intergenic	-
2	5943763	5944024	5.22918	3.81688	3.7785	intergenic	-
2	5944254	5944910	6.88023	4.7259	4.95826	intergenic	-
2	5956176	5956384	4.22053	3.06266	2.12533	utr_3	ENSSSCG00000012992
2	5957103	5957366	9.62652	8.06707	9.32979	Stop	ENSSSCG00000012992
2	5990079	5990593	3.71338	4.37524	4.29951	intergenic	ENSSSCG00000012993
2	6030313	6030538	19.9392	13.2103	14.448	utr_3	ENSSSCG00000012996
2	6030704	6030938	14.1674	22.6915	19.3918	Stop	ENSSSCG00000012996
2	6149842	6150043	4.5034	3.42075	2.73981	CDS	ENSSSCG00000012999
2	6199555	6199749	3.00887	3.11718	1.88334	Stop	ENSSSCG00000013001
2	6199555	6199749	3.00887	3.11718	1.88334	utr_3	ENSSSCG00000013001
2	6199555	6199749	3.00887	3.11718	1.88334	utr_3	ENSSSCG00000027057
2	6203239	6203408	1.74559	2.26809	1.92997	intron	ENSSSCG00000013002
2	6207757	6208018	6.63454	5.3308	5.34848	CDS	ENSSSCG00000013003
2	6208395	6208607	11.467	8.53144	13.3348	Stop	ENSSSCG00000013003
2	6216672	6217005	2.58068	2.03328	1.92694	CDS	ENSSSCG00000013005
2	6226616	6226851	6.48317	4.51504	5.65643	TSS	ENSSSCG00000013005
2	6231429	6231670	4.35781	3.51014	2.78492	Stop	ENSSSCG00000013007
2	6413284	6413791	5.27303	3.85753	7.27471	Stop	ENSSSCG00000023890
2	6452208	6452900	4.33665	4.34897	4.2714	Stop	ENSSSCG00000013017
2	6496250	6496501	7.83725	3.99479	4.18185	CDS	ENSSSCG00000013019
2	6524012	6524401	5.28832	4.94179	4.64013	intron	ENSSSCG00000013021
2	6536180	6536335	1.93879	3.07665	3.68529	Stop	ENSSSCG00000013021
2	6867517	6867831	2.24417	1.77258	1.80921	TSS	ENSSSCG00000013030
2	6868499	6868703	0.984087	0.818637	0.99445	intron	ENSSSCG00000013029
2	6868499	6868703	0.984087	0.818637	0.99445	utr_3	ENSSSCG00000013028
2	6869903	6870301	4.49482	3.62374	3.66819	Stop	ENSSSCG00000013028
2	6870789	6870992	4.53672	3.48629	3.40164	CDS	ENSSSCG00000013028
2	6871991	6872290	5.09262	4.03191	4.26693	intron	ENSSSCG00000013028
2	6876798	6876989	3.24273	2.93834	2.4311	CDS	ENSSSCG00000013028
2	6877987	6878240	18.3651	8.01674	10.9931	intron	ENSSSCG00000013028
2	6878428	6878645	3.82306	2.98054	3.54563	utr_5	ENSSSCG00000013028
2	6896467	6896752	3.56255	5.16922	2.81822	intergenic	-
2	6912132	6912340	7.71842	7.04962	8.87819	Stop	ENSSSCG00000013034
2	6932087	6932569	7.20462	5.41152	5.73789	TSS	ENSSSCG00000013035
2	6935767	6936077	4.80961	3.37302	3.55264	Stop	ENSSSCG00000013036
2	6937010	6937611	28.5446	24.3967	27.298	intergenic	-
2	6939764	6939986	2.39871	2.77852	3.41499	utr_3	ENSSSCG00000013037
2	6942689	6942841	4.66998	2.14957	2.73605	intron	ENSSSCG00000013037
2	7054804	7055152	7.63755	5.94461	7.46552	CDS	ENSSSCG00000013043
2	7284215	7284550	4.64373	5.48942	5.04216	utr_3	ENSSSCG00000022687
2	7348164	7348574	18.4838	17.7296	19.6292	intergenic	-
2	7349007	7349218	2.90214	3.16334	3.41163	intergenic	-
2	7452952	7453199	15.5119	9.9437	13.7307	intergenic	-
2	7554698	7555225	33.232	28.9146	22.4	Stop	ENSSSCG00000013053
2	7792369	7792766	3.16288	3.6423	1.61232	intergenic	-
2	8265815	8266025	3.8287	2.40638	2.82562	TSS	ENSSSCG00000022404
2	8276929	8277139	3.82848	2.00796	3.88074	intron	ENSSSCG00000028025
2	8283031	8283242	10.0085	12.1887	7.58523	TSS	ENSSSCG00000026293
2	8283573	8283778	5.66694	2.20264	1.97875	intron	ENSSSCG00000026293
2	8321717	8321946	3.35819	3.5771	3.95751	intron	ENSSSCG00000022866
2	8322572	8322835	15.4589	10.6693	10.9931	intron	ENSSSCG00000022866
2	8331751	8331997	4.36565	6.22205	4.51194	CDS	ENSSSCG00000020665
2	8331751	8331997	4.36565	6.22205	4.51194	utr_3	ENSSSCG00000020665
2	8331751	8331997	4.36565	6.22205	4.51194	utr_3	ENSSSCG00000021431
2	8365442	8365656	29.1743	21.5909	24.4987	Stop	ENSSSCG00000025351
2	8371787	8371987	4.16937	3.71809	4.79927	intergenic	ENSSSCG00000028413
2	8380323	8381079	17.0549	12.7546	13.5417	CDS	ENSSSCG00000028542
2	8382864	8383068	8.25105	6.74443	5.56221	CDS	ENSSSCG00000028542
2	8391642	8391840	2.10659	2.16167	1.52747	Stop	ENSSSCG00000028542
2	8392156	8392372	3.09859	2.49423	3.23441	intergenic	-
2	8419674	8419999	5.80584	4.12054	4.79798	CDS	ENSSSCG00000023110
2	8423449	8424187	5.05984	5.33828	5.15804	Stop	ENSSSCG00000024995
2	8428746	8428951	6.74636	8.43058	9.33887	CDS	ENSSSCG00000027847
2	8434838	8435059	1.63436	2.46431	2.36063	Stop	ENSSSCG00000023323
2	8443605	8443748	6.35491	8.38731	6.8157	CDS	ENSSSCG00000028275
2	8444056	8444288	8.20467	11.1283	10.7579	CDS	ENSSSCG00000028275
2	8444436	8444563	4.89736	6.1824	6.00956	CDS	ENSSSCG00000028275
2	8445015	8445275	3.55193	5.07948	8.20816	CDS	ENSSSCG00000028275
2	8445923	8446103	5.80275	5.12558	7.55289	Stop	ENSSSCG00000028275
2	8465283	8465497	2.53963	2.35367	2.73472	TSS	ENSSSCG00000020809
2	8468536	8468732	6.4623	4.27439	4.26355	CDS	ENSSSCG00000020809
2	8470478	8470695	3.81689	4.19678	4.96506	utr_3	ENSSSCG00000020809
2	8473173	8473632	2.11744	2.50652	1.62359	utr_5	ENSSSCG00000013061
2	8483671	8483954	6.2966	7.63483	6.6017	intergenic	-
2	8491947	8492174	6.93539	3.76651	5.77922	Stop	ENSSSCG00000013062
2	8503058	8503316	4.96096	13.6516	7.57522	CDS	ENSSSCG00000013063
2	8505953	8506489	10.4943	8.92015	7.51784	CDS	ENSSSCG00000013063
2	8544112	8544629	3.84385	5.01759	7.2701	intergenic	-
2	8545144	8545452	10.6143	7.49266	10.821	CDS	ENSSSCG00000027969
2	8584825	8585248	2.24132	2.98828	5.15491	intergenic	-
2	8586133	8586391	4.95669	5.25629	4.41352	intergenic	-
2	8587025	8587201	3.40784	5.2503	6.81571	intergenic	-
2	8587629	8587816	3.49811	4.1986	3.60399	intergenic	-
2	8651234	8651520	19.7183	13.8122	20.0807	utr_3	ENSSSCG00000013065
2	8651800	8651995	3.46824	3.35029	3.88659	Stop	ENSSSCG00000013065
2	8882347	8882547	19.3562	6.35362	10.679	CDS	ENSSSCG00000013066
2	9119313	9119601	33.9317	21.2254	15.5624	TSS	ENSSSCG00000013072
2	9153170	9153559	11.1492	10.5004	10.305	intergenic	-
2	9186970	9187134	2.77791	6.00406	3.34189	Stop	ENSSSCG00000013074
2	9235029	9235247	21.4784	19.5663	34.1432	intergenic	-
2	9244527	9245175	4.00744	3.93771	3.66921	CDS	ENSSSCG00000028696
2	9245378	9245625	5.30313	4.74009	4.33059	intergenic	ENSSSCG00000028696
2	9250572	9250752	3.7498	2.56807	3.34189	Stop	ENSSSCG00000024015
2	9635136	9635345	3.01289	2.78548	5.18571	intron	ENSSSCG00000013083
2	9710774	9711011	9.00706	5.48225	6.37812	intron	ENSSSCG00000013087
2	9712140	9712428	6.02533	5.39123	4.8337	CDS	ENSSSCG00000013087
2	9749191	9749380	2.05689	1.92022	2.05625	intergenic	-
2	9753884	9754262	1.91255	1.79541	1.56989	intergenic	ENSSSCG00000013093
2	9785692	9786046	5.09901	5.59579	6.83326	Stop	ENSSSCG00000013093
2	10168971	10169176	4.55848	3.24629	3.98193	Stop	ENSSSCG00000028762
2	10351552	10351808	6.76302	5.75439	8.0909	Stop	ENSSSCG00000013113
2	10351552	10351808	6.76302	5.75439	8.0909	utr_3	ENSSSCG00000013114
2	10365807	10366455	10.3329	7.89974	7.23491	utr_5	ENSSSCG00000013114
2	10374193	10374391	4.3621	3.0056	3.5764	Stop	ENSSSCG00000013110
2	10457118	10457422	5.72858	4.13495	5.13509	utr_3	ENSSSCG00000013107
2	10480296	10480501	1.68977	1.73989	1.241	CDS	ENSSSCG00000013105
2	10917015	10917402	5.40685	9.76503	5.32841	intron	ENSSSCG00000013101
2	11089168	11089445	4.0074	5.44995	5.26362	CDS	ENSSSCG00000013118
2	11349998	11350439	10.8144	8.30265	9.16684	TSS	ENSSSCG00000013125
2	11383310	11383734	4.66215	5.62177	6.61598	Stop	ENSSSCG00000013125
2	11383947	11384250	3.3372	5.59399	4.21361	utr_3	ENSSSCG00000013125
2	11815547	11815734	13.7592	17.9358	21.6344	Stop	ENSSSCG00000013145
2	11996862	11997102	7.02665	7.22351	7.44853	intergenic	ENSSSCG00000022597
2	12030353	12030546	1.51352	2.06081	1.51748	Stop	ENSSSCG00000013153
2	12137930	12138249	13.8328	14.2468	16.65	Stop	ENSSSCG00000013155
2	12812172	12812350	2.85336	4.28441	3.27023	CDS	ENSSSCG00000013174
2	12862455	12862846	3.0235	1.72363	2.23002	intergenic	-
2	12884501	12884702	2.51864	2.15258	3.53437	utr_3	ENSSSCG00000013177
2	12885072	12885270	3.22403	5.11596	4.489	utr_3	ENSSSCG00000013178
2	12903317	12903970	10.5943	14.3964	13.0971	intergenic	-
2	12909005	12909198	13.5809	11.4137	9.12018	intergenic	-
2	12915762	12916344	3.59806	4.62254	3.4246	CDS	ENSSSCG00000013179
2	12971651	12971832	1.95202	1.75004	1.95598	intron	ENSSSCG00000013181
2	13382830	13383035	10.0173	12.9502	6.23988	intron	ENSSSCG00000029059
2	13405211	13405410	35.8306	40.1856	21.1067	intron	ENSSSCG00000028527
2	13406993	13407243	7.75892	6.58481	9.29699	intron	ENSSSCG00000028527
2	13407938	13409986	9.49786	9.79502	9.81027	CDS	ENSSSCG00000028527
2	13417418	13417658	5.51368	5.26445	3.81094	intron	ENSSSCG00000028527
2	16213121	16213322	5.53629	4.64109	6.00597	intron	ENSSSCG00000013229
2	16218969	16219801	5.42056	7.60911	6.41128	CDS	ENSSSCG00000013227
2	16226355	16226555	2.84846	4.4865	1.40874	TSS	ENSSSCG00000013226
2	16240290	16240491	7.18206	5.9719	6.24407	intergenic	-
2	16312145	16312400	10.4244	10.863	9.89374	intergenic	-
2	16407740	16407983	13.4217	5.97861	7.40762	CDS	ENSSSCG00000013238
2	16409430	16409631	13.4871	9.22316	14.6919	utr_5	ENSSSCG00000013238
2	16451902	16452333	4.62494	4.31459	3.80067	Stop	ENSSSCG00000013237
2	16548030	16548239	4.96428	3.82814	3.25069	CDS	ENSSSCG00000013241
2	16549649	16549887	3.66169	2.60249	2.78928	TSS	ENSSSCG00000013241
2	16608936	16609188	9.64168	6.18241	7.01797	CDS	ENSSSCG00000013244
2	17180551	17180793	5.95664	8.20094	8.90214	Stop	ENSSSCG00000023097
2	17181636	17181869	2.70521	2.86577	3.46753	CDS	ENSSSCG00000023097
2	17319919	17320111	2.02732	3.92728	3.85979	CDS	ENSSSCG00000013262
2	17463606	17464233	5.48567	4.77834	5.34672	Stop	ENSSSCG00000013262
2	17464584	17464841	7.81828	11.2234	14.1444	utr_3	ENSSSCG00000013262
2	17478122	17478358	6.9525	4.30515	4.41767	CDS	ENSSSCG00000013260
2	17478728	17479039	24.924	19.5894	33.339	TSS	ENSSSCG00000013260
2	17480304	17480868	6.31227	6.34922	6.46394	utr_3	ENSSSCG00000013259
2	17507954	17508195	4.71714	3.8586	6.32101	intron	ENSSSCG00000013259
2	17972997	17973380	14.6114	15.2182	19.6654	Stop	ENSSSCG00000023974
2	18179789	18180011	14.1091	19.3398	40.4545	CDS	ENSSSCG00000013273
2	18667017	18667180	12.943	19.4304	14.9505	intron	ENSSSCG00000013276
2	18921032	18921252	28.5446	16.9303	28.6158	intergenic	-
2	18924080	18924895	7.61635	5.20394	5.37718	intergenic	-
2	19263540	19263859	7.00486	7.25445	6.10477	utr_3	ENSSSCG00000029521
2	19376603	19376808	5.13057	5.97656	5.14639	intergenic	-
2	19709254	19709680	4.20476	5.38436	5.78741	Stop	ENSSSCG00000013281
2	19876913	19877186	3.43193	2.10252	2.6872	intron	ENSSSCG00000013282
2	19985421	19986059	2.77812	3.70259	3.90318	intergenic	-
2	26786202	26786439	7.77531	9.45855	8.82965	CDS	ENSSSCG00000013291
2	26786671	26786939	7.16611	10.2927	9.88712	Stop	ENSSSCG00000013291
2	27737047	27737846	9.35051	7.5861	7.61972	CDS	ENSSSCG00000013295
2	27783804	27784042	5.59698	8.04393	8.33564	intergenic	-
2	27785279	27785911	5.39221	4.75569	7.46699	CDS	ENSSSCG00000025588
2	27954540	27954779	6.0422	8.30998	5.80434	utr_3	ENSSSCG00000028338
2	28157005	28157197	3.96902	6.46776	4.81109	Stop	ENSSSCG00000013297
2	28946605	28947266	7.28871	5.63366	6.91899	utr_5	ENSSSCG00000013303
2	29137220	29137442	3.26609	2.46745	3.04508	CDS	ENSSSCG00000013303
2	29149073	29149270	2.76307	3.15606	2.90218	utr_3	ENSSSCG00000013303
2	29154039	29154242	4.46009	8.5127	6.50789	Stop	ENSSSCG00000013304
2	29412105	29412630	7.17343	5.17043	5.21061	intron	ENSSSCG00000013307
2	29421869	29422394	9.41866	8.60687	9.56083	Stop	ENSSSCG00000013307
2	30149655	30149842	4.62705	5.05008	6.08847	CDS	ENSSSCG00000013312
2	30185916	30186195	3.3398	3.73496	4.36119	intergenic	-
2	30477606	30477813	3.82902	4.23093	5.58936	CDS	ENSSSCG00000013314
2	30480852	30481052	4.58253	7.49721	6.49654	CDS	ENSSSCG00000013314
2	30530777	30531212	4.34085	6.51388	5.60239	utr_5	ENSSSCG00000013314
2	31202419	31202664	3.8934	6.54041	5.18837	intron	ENSSSCG00000013318
2	31202419	31202664	3.8934	6.54041	5.18837	intron	ENSSSCG00000024950
2	31202419	31202664	3.8934	6.54041	5.18837	Stop	ENSSSCG00000013318
2	31214247	31214468	1.67301	1.47955	1.73795	intron	ENSSSCG00000013318
2	31214247	31214468	1.67301	1.47955	1.73795	intron	ENSSSCG00000024950
2	31214247	31214468	1.67301	1.47955	1.73795	utr_5	ENSSSCG00000013318
2	31737058	31737263	3.20076	3.52715	3.85757	TSS	ENSSSCG00000013321
2	34619350	34619578	20.4989	21.8762	32.8913	CDS	ENSSSCG00000013331
2	35455101	35455656	12.5313	9.63311	10.7656	utr_5	ENSSSCG00000013335
2	35611957	35612419	3.36146	4.47986	4.24793	Stop	ENSSSCG00000013335
2	40059527	40059731	4.58869	4.18707	3.95751	intergenic	-
2	40096137	40096687	4.44688	5.20281	4.97268	intergenic	-
2	41963568	41963778	10.8571	8.15461	9.02335	TSS	ENSSSCG00000013349
2	43606294	43606544	5.51878	9.14389	7.88809	CDS	ENSSSCG00000013361
2	43801826	43802033	12.4697	12.161	9.64008	utr_5	ENSSSCG00000021729
2	43963694	43963936	4.18444	3.56343	3.59427	utr_5	ENSSSCG00000013368
2	44061457	44061874	6.98195	10.3437	0.309113	intergenic	-
2	44064518	44064723	11.0743	15.4023	11.6726	intergenic	-
2	45076371	45076585	11.7117	12.4149	15.8977	intron	ENSSSCG00000025406
2	47651653	47651968	4.20198	6.4836	7.24876	Stop	ENSSSCG00000021819
2	47819029	47819455	15.6451	17.8962	18.0286	intergenic	-
2	50766125	50766372	3.00218	4.43354	4.73924	Stop	ENSSSCG00000013402
2	50780570	50781166	4.88166	6.75987	11.2333	CDS	ENSSSCG00000013402
2	51975434	51976777	5.36995	6.14672	7.64036	CDS	ENSSSCG00000013404
2	52051784	52051984	4.05015	2.97231	3.54156	CDS	ENSSSCG00000013406
2	52274743	52274943	28.1248	25.6807	33.9466	Stop	ENSSSCG00000020720
2	52576718	52577102	5.83019	6.23363	7.69142	Stop	ENSSSCG00000013408
2	53040073	53040325	6.65495	7.33736	12.3122	intergenic	-
2	53870998	53871549	11.2209	7.67253	7.29353	CDS	ENSSSCG00000013991
2	53892198	53892487	2.58443	2.80283	2.58824	intron	ENSSSCG00000013992
2	54307623	54307847	4.98481	7.29206	6.29795	Stop	ENSSSCG00000013984
2	54412766	54413010	2.79849	2.85341	4.2281	intergenic	ENSSSCG00000013983
2	55199775	55199940	7.03118	10.3385	9.43938	utr_5	ENSSSCG00000013978
2	55235138	55235515	6.41439	6.36425	5.96624	CDS	ENSSSCG00000025900
2	55236579	55236852	4.0168	3.01194	3.53407	utr_3	ENSSSCG00000025900
2	58023243	58023650	14.5422	17.6555	24.7815	Stop	ENSSSCG00000013939
2	58278998	58279359	6.91614	10.4918	8.58311	utr_3	ENSSSCG00000013938
2	58313192	58313485	9.11696	6.65797	7.17087	CDS	ENSSSCG00000013934
2	58560184	58560428	6.15231	4.59237	4.62119	intergenic	-
2	58560877	58561134	4.12276	4.92176	7.81275	intergenic	-
2	58598736	58599236	8.39547	7.90804	9.72888	intergenic	-
2	58921456	58921706	16.3588	16.6084	19.9341	CDS	ENSSSCG00000013913
2	59044347	59044804	6.69139	4.89718	5.22447	CDS	ENSSSCG00000013905
2	59045986	59046219	14.3189	14.865	24.9348	intron	ENSSSCG00000013905
2	59149168	59149377	2.85839	3.28479	3.48666	utr_3	ENSSSCG00000013896
2	59149168	59149377	2.85839	3.28479	3.48666	utr_3	ENSSSCG00000013896
2	59149168	59149377	2.85839	3.28479	3.48666	utr_3	ENSSSCG00000013897
2	59192812	59193092	5.14999	6.4556	5.49652	Stop	ENSSSCG00000029924
2	59395602	59395857	5.27527	5.07686	4.17209	TSS	ENSSSCG00000013891
2	59505394	59505618	8.21296	12.2529	16.3577	Stop	ENSSSCG00000013886
2	59505795	59505992	8.82759	11.7704	7.24249	CDS	ENSSSCG00000013886
2	59589910	59590116	5.75245	8.56025	6.47273	CDS	ENSSSCG00000013884
2	59590310	59590521	4.16859	4.40342	7.45768	CDS	ENSSSCG00000013884
2	59591268	59591548	5.18156	6.65799	5.34896	CDS	ENSSSCG00000013884
2	59778983	59779201	3.95923	3.84985	4.1518	CDS	ENSSSCG00000013878
2	59809531	59809749	2.95581	4.08158	3.42355	Stop	ENSSSCG00000013883
2	59993481	59993712	4.35919	5.65928	4.89977	utr_5	ENSSSCG00000013870
2	60062473	60062617	5.3089	3.10372	2.41848	CDS	ENSSSCG00000013876
2	60062886	60063139	2.6026	4.55891	3.91563	CDS	ENSSSCG00000013876
2	60076697	60077001	3.77325	5.64664	6.31602	Stop	ENSSSCG00000013876
2	60077321	60077843	5.59237	5.55764	4.6062	utr_3	ENSSSCG00000013876
2	60095362	60095684	4.46568	4.09548	4.74697	utr_3	ENSSSCG00000013873
2	60097896	60098170	7.87996	5.35575	6.26451	CDS	ENSSSCG00000013873
2	60106627	60106994	6.97019	5.41648	5.85804	CDS	ENSSSCG00000013873
2	60107704	60107971	7.31227	5.64927	5.94824	intergenic	-
2	60315087	60315304	4.75743	11.6175	10.6333	intergenic	-
2	60315958	60316154	3.61304	5.77643	6.63841	Stop	ENSSSCG00000013867
2	60322307	60322533	6.52981	6.93773	4.82437	CDS	ENSSSCG00000013867
2	60571089	60571293	4.51257	4.16689	4.66783	intergenic	-
2	60619927	60620109	5.54101	6.01121	7.07377	CDS	ENSSSCG00000013862
2	60620471	60620681	6.63242	7.08599	6.95044	CDS	ENSSSCG00000013862
2	60620836	60621079	10.2944	9.36123	10.3622	Stop	ENSSSCG00000013862
2	60623459	60623893	24.3792	24.2261	24.0382	utr_3	ENSSSCG00000013862
2	60624387	60624608	7.70503	5.42149	6.29497	TSS	ENSSSCG00000013861
2	60641160	60642011	7.13891	10.5208	9.09816	utr_3	ENSSSCG00000013861
2	60649186	60649426	16.8958	19.4983	13.9246	intergenic	-
2	60664543	60664888	6.36069	8.46269	7.82991	intergenic	ENSSSCG00000013860
2	60904157	60904425	4.69621	6.15737	6.49876	intergenic	-
2	61021828	61022070	4.0478	3.82991	4.19427	utr_3	ENSSSCG00000013855
2	61156548	61156836	3.02802	2.45885	2.52784	TSS	ENSSSCG00000013849
2	61195297	61195493	2.34533	2.92322	2.897	Stop	ENSSSCG00000013848
2	61524813	61525028	3.88652	2.78616	2.57811	intron	ENSSSCG00000027013
2	61524813	61525028	3.88652	2.78616	2.57811	intron	ENSSSCG00000027903
2	61570156	61570754	2.7902	3.58707	3.43226	CDS	ENSSSCG00000025560
2	61751071	61751277	3.70062	4.43031	3.37517	CDS	ENSSSCG00000013836
2	61753610	61753830	4.11378	2.85342	3.65053	CDS	ENSSSCG00000013836
2	61796925	61797192	6.80966	4.24945	5.14594	Stop	ENSSSCG00000013838
2	61802972	61803160	2.68532	3.12875	1.36803	CDS	ENSSSCG00000013837
2	61826670	61826870	12.5932	19.7361	13.5686	intergenic	-
2	61827172	61827431	15.3835	17.6701	13.1726	intergenic	-
2	61922249	61922468	1.68775	2.79488	2.19465	utr_3	ENSSSCG00000022227
2	62008957	62009362	11.5607	14.6652	12.5971	Stop	ENSSSCG00000013829
2	62008957	62009362	11.5607	14.6652	12.5971	utr_3	ENSSSCG00000013829
2	62008957	62009362	11.5607	14.6652	12.5971	utr_3	ENSSSCG00000013830
2	62012193	62012478	4.94731	3.32899	3.39506	CDS	ENSSSCG00000013829
2	62051552	62051752	5.69238	3.8622	3.23101	intergenic	-
2	65115336	65115536	2.33522	2.91579	2.906	utr_3	ENSSSCG00000013775
2	65115336	65115536	2.33522	2.91579	2.906	utr_3	ENSSSCG00000013776
2	65180086	65180322	4.85693	5.13447	3.53808	TSS	ENSSSCG00000013784
2	65206476	65206733	6.15349	5.20215	3.8256	CDS	ENSSSCG00000013779
2	65350518	65350871	16.9916	14.0025	13.128	TSS	ENSSSCG00000013771
2	65372435	65372635	3.09949	2.20491	2.61579	intergenic	-
2	65383418	65383694	5.73152	9.11089	6.37596	CDS	ENSSSCG00000013768
2	65383418	65383694	5.73152	9.11089	6.37596	nc_exon	ENSSSCG00000029473
2	65391305	65391580	2.74467	2.95028	2.71287	intergenic	ENSSSCG00000013767
2	65399298	65400792	8.67532	6.02349	6.65075	CDS	ENSSSCG00000013767
2	65525935	65526159	29.1218	12.6026	16.8129	TSS	ENSSSCG00000013761
2	65673421	65673624	4.59799	3.76008	4.55124	intron	ENSSSCG00000013757
2	65681590	65681824	2.63164	1.94032	1.73977	CDS	ENSSSCG00000013756
2	65683431	65683680	3.60372	7.37135	4.86626	Stop	ENSSSCG00000013755
2	66210328	66211299	3.08448	3.62178	3.78838	intergenic	ENSSSCG00000013753
2	66215056	66215257	7.53528	6.06616	5.42743	CDS	ENSSSCG00000013752
2	66257017	66257380	9.04421	7.90028	7.15517	CDS	ENSSSCG00000013751
2	66276994	66277205	7.08091	4.54764	4.9207	intron	ENSSSCG00000013745
2	66286765	66287123	4.35672	3.88162	3.34139	Stop	ENSSSCG00000013746
2	66296246	66296520	3.80842	4.41557	4.62063	Stop	ENSSSCG00000013748
2	66322259	66322716	18.7774	14.1169	13.066	intergenic	-
2	66419535	66419785	28.1155	19.7294	23.1954	intergenic	-
2	66461521	66461722	2.21316	1.88863	1.93247	intergenic	ENSSSCG00000013729
2	66505196	66505525	6.47362	5.152	5.86458	utr_5	ENSSSCG00000013735
2	66505671	66505994	3.82293	3.33733	3.1129	utr_5	ENSSSCG00000013735
2	66506372	66506788	7.96667	9.42938	9.6628	Stop	ENSSSCG00000013735
2	66641341	66641594	5.95028	5.36096	7.15869	TSS	ENSSSCG00000013728
2	66643033	66643459	3.03648	2.40865	2.76736	CDS	ENSSSCG00000013727
2	66645701	66645899	2.98549	3.47037	3.64775	Stop	ENSSSCG00000013727
2	66651493	66651861	16.57	20.5447	13.1184	intergenic	-
2	66666017	66666338	7.36584	6.29216	6.00956	utr_3	ENSSSCG00000013726
2	66686918	66687154	5.65695	3.8272	5.21386	Stop	ENSSSCG00000013722
2	66691502	66691757	2.84674	2.2012	3.32934	intron	ENSSSCG00000013722
2	66706815	66707033	1.70967	1.91008	1.93971	TSS	ENSSSCG00000013720
2	66722974	66723279	5.72875	4.14425	4.25516	CDS	ENSSSCG00000013720
2	66861170	66861433	8.81525	7.20149	6.43883	Stop	ENSSSCG00000022634
2	67265432	67265658	7.2411	9.72275	10.1536	CDS	ENSSSCG00000013715
2	67687176	67687456	2.90138	4.78851	6.84436	CDS	ENSSSCG00000022610
2	67687704	67687913	6.11141	10.1167	6.4238	CDS	ENSSSCG00000022610
2	67688176	67688406	2.66107	7.8286	4.24019	Stop	ENSSSCG00000022610
2	67688809	67689017	10.4943	10.2587	13.1917	utr_3	ENSSSCG00000022610
2	68886121	68886526	2.48366	2.61351	3.75792	intron	ENSSSCG00000013671
2	68888111	68888312	3.65803	3.75298	4.44608	intron	ENSSSCG00000013671
2	68899370	68899578	11.1375	17.0254	16.4163	intron	ENSSSCG00000013671
2	68921062	68921265	3.94333	5.4532	4.55427	Stop	ENSSSCG00000013670
2	68921539	68921762	4.33265	6.48326	4.09637	CDS	ENSSSCG00000013670
2	69135266	69135494	11.2667	9.60028	12.3023	TSS	ENSSSCG00000027434
2	69278176	69278457	6.57674	4.10643	4.60126	CDS	ENSSSCG00000013663
2	69290165	69290498	4.65801	3.70078	3.44571	CDS	ENSSSCG00000013662
2	69401571	69401783	3.48006	2.40998	3.45622	utr_5	ENSSSCG00000013656
2	69459210	69459405	3.17521	3.76082	4.07323	Stop	ENSSSCG00000013651
2	69463617	69463814	47.9877	29.406	33.9319	intron	ENSSSCG00000013651
2	69540258	69540633	7.4906	5.51296	5.88376	CDS	ENSSSCG00000013647
2	69648290	69648511	5.99677	9.96193	9.5483	CDS	ENSSSCG00000028460
2	69648290	69648511	5.99677	9.96193	9.5483	intron	ENSSSCG00000013641
2	69706060	69706337	15.6085	8.58562	11.682	utr_5	ENSSSCG00000013645
2	69782914	69783170	12.1798	7.73764	10.6922	intergenic	-
2	69798492	69798683	4.136	8.75048	3.24718	intergenic	-
2	70007317	70007571	5.38405	8.58998	10.6022	intergenic	ENSSSCG00000013631
2	70036979	70037233	8.91029	5.89706	8.57246	TSS	ENSSSCG00000013633
2	70079016	70079255	5.01697	3.69609	2.96723	intergenic	-
2	70084686	70085379	6.84259	6.38349	6.03109	CDS	ENSSSCG00000013635
2	70085502	70085662	2.92967	3.1788	2.57476	Stop	ENSSSCG00000013635
2	70227043	70227349	17.5542	12.5326	8.48588	Stop	ENSSSCG00000013629
2	70389003	70389204	2.27377	3.07022	2.36805	Stop	ENSSSCG00000013623
2	70398582	70398864	5.46917	5.59116	5.27011	TSS	ENSSSCG00000013623
2	70424893	70425152	2.81882	3.59137	3.56804	Stop	ENSSSCG00000013619
2	70489623	70489827	6.51919	7.34671	5.46325	intergenic	ENSSSCG00000013616
2	70507300	70507520	16.0913	10.2387	15.5662	TSS	ENSSSCG00000013616
2	70511569	70511765	3.25568	4.10643	3.74286	CDS	ENSSSCG00000013615
2	70543622	70543793	2.32923	1.72813	2.3898	Stop	ENSSSCG00000013614
2	70950479	70950709	7.57922	9.21411	11.3778	CDS	ENSSSCG00000029035
2	71183451	71183942	4.65743	3.62437	3.69612	CDS	ENSSSCG00000013602
2	71225002	71225290	6.32099	5.8856	5.46802	TSS	ENSSSCG00000013602
2	71228731	71228880	6.87962	11.5001	10.4434	utr_3	ENSSSCG00000013601
2	71229070	71229280	1.47953	2.96665	2.71372	Stop	ENSSSCG00000013601
2	71251669	71251974	1.98375	2.28642	2.17199	utr_3	ENSSSCG00000013600
2	71262691	71262919	3.94677	6.40432	3.15135	TSS	ENSSSCG00000013600
2	71272567	71272945	5.85709	5.28004	4.87909	Stop	ENSSSCG00000013599
2	71311163	71311839	7.60459	6.47343	7.89024	CDS	ENSSSCG00000013598
2	71405348	71405589	3.58674	3.42028	2.89569	Stop	ENSSSCG00000013595
2	71607497	71607715	4.00693	3.72529	3.62332	TSS	ENSSSCG00000013592
2	71680264	71680546	4.39677	3.80455	4.56882	CDS	ENSSSCG00000013591
2	71681357	71681628	6.12169	3.33762	4.71811	CDS	ENSSSCG00000013591
2	71687833	71688012	3.746	3.34764	3.37028	Stop	ENSSSCG00000013591
2	71699508	71700086	13.0105	10.6437	8.91061	intron	ENSSSCG00000013588
2	71700624	71700833	3.1483	4.38821	3.7275	intron	ENSSSCG00000013588
2	71708297	71708495	3.21055	3.4875	3.90865	TSS	ENSSSCG00000013588
2	71774315	71774562	5.3606	13.2659	7.78471	Stop	ENSSSCG00000013585
2	71896625	71896993	10.9868	11.9685	14.4639	CDS	ENSSSCG00000013583
2	71898818	71899077	9.68782	6.58289	7.63475	intron	ENSSSCG00000013583
2	71968679	71968946	4.11853	2.5441	2.27002	CDS	ENSSSCG00000013578
2	71969764	71969961	9.99724	6.65797	7.67824	intron	ENSSSCG00000013578
2	72155230	72155436	2.36478	3.30426	3.16703	nc_exon	ENSSSCG00000025078
2	72158188	72158485	9.75138	7.21136	9.9176	intergenic	-
2	72176912	72177108	2.99283	3.25815	3.67414	intergenic	-
2	72177852	72178199	4.61233	5.28722	7.73913	intergenic	-
2	72180115	72180375	6.98772	4.17445	4.88244	CDS	ENSSSCG00000013568
2	72420038	72420351	3.79945	4.07404	5.76296	Stop	ENSSSCG00000013564
2	72420945	72421150	1.99274	2.80739	1.96757	utr_3	ENSSSCG00000013564
2	72421679	72421984	5.51159	6.86722	7.75797	utr_3	ENSSSCG00000013564
2	72996861	72997410	8.92019	18.8445	18.9081	Stop	ENSSSCG00000026695
2	73169905	73170445	13.4499	13.5265	13.8288	intron	ENSSSCG00000013538
2	73180137	73180381	4.56453	5.03635	5.32296	intergenic	-
2	73210442	73210791	9.16812	5.40961	5.34209	CDS	ENSSSCG00000013539
2	73217012	73217244	2.57485	2.61086	3.04098	TSS	ENSSSCG00000024254
2	73220799	73221035	5.54232	6.52527	7.98832	intergenic	-
2	73400832	73401027	4.60397	3.74115	3.6694	CDS	ENSSSCG00000013534
2	73410660	73410969	5.01903	5.28967	6.33526	intergenic	-
2	73691374	73691624	2.53919	3.55725	3.70977	intergenic	-
2	73823555	73824144	10.2611	6.81253	7.35996	intron	ENSSSCG00000013522
2	73828756	73828995	6.53094	3.39692	3.66226	CDS	ENSSSCG00000013522
2	73904744	73904974	2.04056	2.09968	2.32794	TSS	ENSSSCG00000013522
2	73905340	73905544	5.9281	4.13066	4.6122	TSS	ENSSSCG00000013523
2	73933032	73933359	6.70987	4.48002	5.19792	CDS	ENSSSCG00000013523
2	74406091	74406390	2.82539	3.24363	3.099	CDS	ENSSSCG00000028612
2	74436501	74436703	17.5405	14.5841	18.615	TSS	ENSSSCG00000024570
2	74456607	74457023	2.0541	2.43931	2.43599	Stop	ENSSSCG00000024570
2	74787355	74788229	7.62338	8.65252	7.64204	intergenic	-
2	74794456	74794778	6.06925	5.66024	6.0242	CDS	ENSSSCG00000013514
2	74805706	74806087	7.10214	7.42981	6.74047	Stop	ENSSSCG00000013513
2	74826361	74826537	5.12266	3.57126	2.92246	CDS	ENSSSCG00000013511
2	74829658	74830004	13.8313	10.7267	9.17296	CDS	ENSSSCG00000013511
2	74907441	74907659	10.6567	7.32377	9.70423	TSS	ENSSSCG00000013508
2	74948355	74948785	14.5318	11.9524	13.2675	TSS	ENSSSCG00000013507
2	75072708	75072952	5.86201	4.79554	4.24104	Stop	ENSSSCG00000013501
2	75170915	75171144	2.32281	2.51438	2.52029	utr_5	ENSSSCG00000027127
2	75223235	75223421	8.32847	6.39858	7.55289	intergenic	-
2	75232809	75233005	5.6029	4.479	8.17366	TSS	ENSSSCG00000029236
2	75233235	75234041	11.8542	15.7308	12.2821	CDS	ENSSSCG00000029236
2	75238709	75239108	5.45332	5.34882	5.81836	Stop	ENSSSCG00000029236
2	75243110	75243394	19.327	16.1694	13.7194	intergenic	-
2	75247034	75247307	7.06143	4.6065	5.91627	utr_3	ENSSSCG00000022066
2	75247441	75247798	9.1587	5.1927	6.25207	Stop	ENSSSCG00000022066
2	75268549	75268885	2.76132	3.69729	3.88169	CDS	ENSSSCG00000022066
2	75300553	75300752	2.0403	2.39002	2.53743	utr_3	ENSSSCG00000025675
2	75318191	75318438	5.48414	7.95498	4.9169	intergenic	-
2	75517538	75517948	7.96089	6.6731	9.57618	intergenic	ENSSSCG00000024242
2	75665694	75665902	6.6419	6.01412	7.07121	intergenic	-
2	75666447	75666676	4.55247	4.62361	3.91354	intergenic	-
2	75708806	75709476	9.85643	10.3862	9.40338	intergenic	-
2	75712983	75713171	3.88907	2.85342	2.48494	intergenic	-
2	75730835	75731324	11.0518	11.5104	9.84558	Stop	ENSSSCG00000013478
2	75736038	75736304	3.30839	2.802	2.14042	CDS	ENSSSCG00000013478
2	75777053	75777286	2.61013	2.05569	2.03774	TSS	ENSSSCG00000013482
2	75777053	75777286	2.61013	2.05569	2.03774	utr_3	ENSSSCG00000026169
2	75777053	75777286	2.61013	2.05569	2.03774	utr_3	ENSSSCG00000013482
2	75777722	75777927	3.12731	3.03751	2.68587	intron	ENSSSCG00000013482
2	75777722	75777927	3.12731	3.03751	2.68587	utr_3	ENSSSCG00000026169
2	75777722	75777927	3.12731	3.03751	2.68587	utr_3	ENSSSCG00000013482
2	75812414	75812627	4.18814	4.5031	4.64742	nc_exon	ENSSSCG00000013472
2	75892915	75893237	6.07826	5.06064	4.85423	intergenic	-
2	75893582	75893974	6.88222	8.21117	7.09159	utr_3	ENSSSCG00000013475
2	75908970	75909166	3.91789	3.56838	3.50135	utr_5	ENSSSCG00000013475
2	76070823	76071217	8.26797	7.77587	8.10902	utr_5	ENSSSCG00000029279
2	76088589	76088919	3.92565	4.17595	3.67995	utr_3	ENSSSCG00000029279
2	76089251	76089655	4.17911	5.7953	4.61007	utr_3	ENSSSCG00000029279
2	76324014	76324427	4.21915	4.98397	5.98022	CDS	ENSSSCG00000013469
2	76324747	76324953	7.55134	6.82582	10.1831	CDS	ENSSSCG00000013469
2	76370132	76370430	2.92285	3.1411	4.47315	Stop	ENSSSCG00000013468
2	76379403	76379662	4.40987	4.32767	5.27667	intron	ENSSSCG00000013468
2	76389467	76389696	6.84554	5.43802	7.23299	TSS	ENSSSCG00000013468
2	76408183	76408398	8.35611	6.53654	8.13073	utr_3	ENSSSCG00000013467
2	76659490	76659954	9.03851	9.37551	8.83011	utr_3	ENSSSCG00000022689
2	76677431	76677634	6.87653	3.98151	4.58999	TSS	ENSSSCG00000026784
2	76698444	76698646	3.28669	3.15914	3.18258	TSS	ENSSSCG00000022757
2	76699155	76699478	4.16562	6.59249	5.19977	utr_3	ENSSSCG00000022757
2	76783171	76783453	5.95975	6.10499	6.38814	Stop	ENSSSCG00000013464
2	76857476	76857850	3.19949	2.73452	4.07743	intron	ENSSSCG00000013460
2	76959619	76959856	5.19947	5.42708	4.35771	intergenic	-
2	77007019	77007318	4.22186	3.87703	2.71481	intergenic	ENSSSCG00000013455
2	77052303	77052507	3.65735	3.54515	3.92867	Stop	ENSSSCG00000013453
2	77057675	77057900	4.26331	7.26566	8.72681	CDS	ENSSSCG00000013457
2	77148896	77149140	4.36312	4.46328	5.84695	Stop	ENSSSCG00000013442
2	77149743	77149993	6.54647	6.43848	6.93785	intron	ENSSSCG00000013442
2	77150458	77150638	7.54281	3.50192	7.25543	intron	ENSSSCG00000013442
2	77151669	77152030	8.12171	13.9212	7.28684	intron	ENSSSCG00000013442
2	77153635	77153855	4.77975	4.1216	4.44982	utr_5	ENSSSCG00000013442
2	77157062	77157294	14.7266	14.0216	13.1156	intron	ENSSSCG00000013442
2	77165550	77165801	4.69246	3.99479	4.4586	intergenic	ENSSSCG00000025631
2	77246749	77247173	3.21363	2.35367	2.62438	intergenic	-
2	77263882	77264106	4.14959	4.89156	3.74523	Stop	ENSSSCG00000013444
2	77279469	77280037	3.90568	4.51048	4.32063	utr_3	ENSSSCG00000013445
2	77288093	77288336	6.78634	6.27751	5.93626	TSS	ENSSSCG00000013445
2	77320568	77320777	7.82305	7.3449	4.08312	utr_3	ENSSSCG00000013446
2	77482250	77482503	14.7538	4.89157	29.4615	intron	ENSSSCG00000029130
2	77491940	77492136	3.4931	4.36335	4.23391	intergenic	-
2	77511405	77511606	7.58186	5.34449	5.31256	intron	ENSSSCG00000013419
2	77518104	77518325	2.9718	2.58969	3.28163	intron	ENSSSCG00000013419
2	77565727	77565941	6.85218	5.97858	4.44846	Stop	ENSSSCG00000013414
2	77566706	77567225	3.96667	3.0912	3.15754	utr_3	ENSSSCG00000013414
2	77595577	77595914	5.73456	4.42598	4.23362	intron	ENSSSCG00000027779
2	77595577	77595914	5.73456	4.42598	4.23362	intron	ENSSSCG00000029635
2	77595577	77595914	5.73456	4.42598	4.23362	utr_3	ENSSSCG00000027779
2	77603812	77604002	6.74453	5.41092	5.08854	utr_5	ENSSSCG00000027779
2	77654709	77654936	6.41654	5.67288	4.09397	Stop	ENSSSCG00000027565
2	77655932	77656161	4.60034	4.37654	4.41241	Stop	ENSSSCG00000021472
2	77677817	77678018	3.63804	2.68048	3.25395	Stop	ENSSSCG00000030042
2	77784348	77784564	10.2365	9.08298	8.90571	intron	ENSSSCG00000013431
2	77792355	77792579	1.78335	1.84753	2.16628	Stop	ENSSSCG00000013432
2	77822723	77822941	3.76681	3.6522	4.59675	intergenic	-
2	77835398	77835645	4.36469	3.5697	5.51121	intron	ENSSSCG00000013427
2	77836816	77837153	18.4015	12.384	17.3075	CDS	ENSSSCG00000013427
2	77844066	77844355	2.30074	2.50103	2.72409	Stop	ENSSSCG00000028040
2	77891323	77891506	4.30061	3.517	3.0655	TSS	ENSSSCG00000022265
2	77893894	77894546	6.78524	7.66221	7.9313	Stop	ENSSSCG00000022265
2	77937124	77937344	9.17004	5.60928	8.68785	intron	ENSSSCG00000023248
2	77962532	77962846	15.2486	14.2978	15.3823	TSS	ENSSSCG00000022528
2	77968097	77968369	8.74528	12.0742	8.01273	intergenic	-
2	77969125	77969369	7.81995	4.4981	5.69325	intron	ENSSSCG00000023142
2	77983021	77983398	3.47205	4.61121	4.93255	intergenic	-
2	77989485	77989668	3.72299	2.19494	2.44779	CDS	ENSSSCG00000013426
2	77997888	77998257	7.1633	9.07028	8.48588	CDS	ENSSSCG00000013426
2	78003294	78003532	8.67532	6.9657	6.98533	intergenic	-
2	78143108	78144095	9.40259	11.2297	11.0702	CDS	ENSSSCG00000021750
2	78143108	78144095	9.40259	11.2297	11.0702	CDS	ENSSSCG00000019211
2	78150137	78150342	4.96663	3.71176	4.15853	TSS	ENSSSCG00000021750
2	78156411	78157299	3.97376	4.84558	4.08402	intergenic	ENSSSCG00000013435
2	78157561	78158055	5.12124	4.28642	4.37686	Stop	ENSSSCG00000013435
2	78165504	78165840	26.78	23.3821	22.4953	intron	ENSSSCG00000013435
2	78183765	78183989	7.4695	7.15257	5.50947	intron	ENSSSCG00000013437
2	78185974	78186143	7.82305	3.62339	3.34189	intron	ENSSSCG00000013437
2	78316842	78317026	16.7909	20.2117	8.92009	CDS	ENSSSCG00000013425
2	78333528	78333744	14.4122	10.9117	14.7226	utr_5	ENSSSCG00000013424
2	79277508	79277765	3.27323	12.5687	4.15738	utr_3	ENSSSCG00000014003
2	79502117	79502342	5.08667	4.60351	4.57918	Stop	ENSSSCG00000014007
2	79635155	79635472	25.794	16.1271	15.0422	intergenic	-
2	79823464	79823665	13.8912	13.1768	14.1968	intergenic	ENSSSCG00000026972
2	80290320	80291251	6.08732	5.38697	7.52739	Stop	ENSSSCG00000014014
2	80296507	80296775	6.02044	7.47323	2.34519	intergenic	-
2	80326615	80326851	2.49584	2.1299	1.91719	intron	ENSSSCG00000014016
2	80349844	80350038	1.43262	1.54109	1.52571	TSS	ENSSSCG00000014017
2	80387475	80387760	9.7822	11.9572	9.08762	Stop	ENSSSCG00000014019
2	80388056	80388333	5.08746	7.85241	5.75021	CDS	ENSSSCG00000014019
2	80405984	80406243	4.02283	7.50341	4.54081	CDS	ENSSSCG00000014019
2	80406618	80407175	3.4255	4.25419	3.51779	CDS	ENSSSCG00000014019
2	80442956	80443164	6.26897	9.21872	9.53321	utr_5	ENSSSCG00000014019
2	80482235	80482556	2.53921	2.2183	2.18457	TSS	ENSSSCG00000014020
2	80588363	80588563	8.22756	5.94462	6.60446	TSS	ENSSSCG00000014023
2	80769644	80769918	5.92465	8.93102	5.91627	intron	ENSSSCG00000024043
2	81122027	81122283	8.66153	17.7822	14.752	utr_3	ENSSSCG00000029380
2	81298428	81298628	8.51894	8.56025	9.90839	intergenic	-
2	81810285	81810591	6.63997	4.13725	4.5885	utr_5	ENSSSCG00000014031
2	81845139	81845360	8.92019	17.4772	12.5828	Stop	ENSSSCG00000014033
2	81860891	81861121	4.70301	4.15889	5.09627	CDS	ENSSSCG00000014038
2	81860891	81861121	4.70301	4.15889	5.09627	intron	ENSSSCG00000014033
2	81861475	81861594	1.48952	2.28787	2.36613	CDS	ENSSSCG00000014038
2	81861475	81861594	1.48952	2.28787	2.36613	intron	ENSSSCG00000014033
2	81890680	81890885	8.10926	5.6716	7.01687	intron	ENSSSCG00000014033
2	81890680	81890885	8.10926	5.6716	7.01687	TSS	ENSSSCG00000014038
2	81922377	81922603	4.42911	4.04114	3.98776	intron	ENSSSCG00000014033
2	81922377	81922603	4.42911	4.04114	3.98776	utr_3	ENSSSCG00000014036
2	81937179	81937818	9.97309	11.4059	15.8572	intron	ENSSSCG00000014033
2	81937179	81937818	9.97309	11.4059	15.8572	utr_3	ENSSSCG00000014035
2	82031560	82031757	20.9887	20.925	48.8092	intron	ENSSSCG00000014033
2	82031560	82031757	20.9887	20.925	48.8092	Stop	ENSSSCG00000014034
2	82136438	82136690	3.76842	5.16923	5.99622	CDS	ENSSSCG00000014044
2	82137155	82137390	3.41066	5.0981	5.54433	CDS	ENSSSCG00000014044
2	82212763	82213001	5.95354	4.95384	6.01221	CDS	ENSSSCG00000014044
2	82213262	82214177	4.14684	5.70298	5.70531	CDS	ENSSSCG00000014044
2	82220191	82220378	4.36235	6.16706	8.62957	Stop	ENSSSCG00000014043
2	82221887	82222155	5.06512	3.98747	4.34225	utr_5	ENSSSCG00000014043
2	82260605	82260826	3.57655	3.14146	3.77132	intergenic	ENSSSCG00000014040
2	82273330	82273522	3.38954	3.50307	3.62743	TSS	ENSSSCG00000014040
2	82292851	82293105	2.36123	2.87912	2.83892	Stop	ENSSSCG00000014039
2	82380477	82380681	28.3347	40.4234	56.1086	CDS	ENSSSCG00000014045
2	82868566	82868770	7.91112	9.03582	14.4229	utr_3	ENSSSCG00000014051
2	83003655	83003849	8.39547	8.02523	7.43759	utr_3	ENSSSCG00000014057
2	83006419	83006670	4.38662	4.12726	4.16412	Stop	ENSSSCG00000014057
2	83066605	83066934	5.12027	3.83901	3.9588	CDS	ENSSSCG00000014058
2	83150160	83150403	5.01819	8.59093	6.81005	utr_3	ENSSSCG00000029985
2	83150640	83150825	3.42609	5.84271	6.20785	utr_3	ENSSSCG00000029985
2	83156744	83156965	9.79472	9.85108	6.30269	intron	ENSSSCG00000029985
2	83999234	83999621	11.1357	11.7214	12.1093	CDS	ENSSSCG00000014066
2	84211974	84212189	16.1451	18.6001	16.4582	Stop	ENSSSCG00000014068
2	84269472	84269688	17.4031	11.1461	11.9557	intron	ENSSSCG00000014071
2	85278298	85278487	33.2321	13.8708	14.8706	Stop	ENSSSCG00000014072
2	85278703	85278912	5.05636	3.80455	4.83695	CDS	ENSSSCG00000014072
2	85441336	85441536	4.75743	9.0724	8.00445	Stop	ENSSSCG00000014076
2	85989681	85989888	4.35321	4.75568	4.00006	utr_3	ENSSSCG00000014080
2	86174014	86174445	4.05781	3.57257	3.73171	utr_5	ENSSSCG00000014082
2	86916833	86917259	18.3701	13.3474	14.4524	utr_5	ENSSSCG00000014087
2	87280829	87281244	14.2689	15.6854	15.1931	utr_3	ENSSSCG00000020672
2	87282226	87282571	1.26845	2.65716	2.46873	Stop	ENSSSCG00000020672
2	87283221	87283487	12.8794	13.0895	12.7125	CDS	ENSSSCG00000020672
2	87296090	87296286	1.96584	2.29859	2.88215	intergenic	ENSSSCG00000020672
2	87564821	87565285	6.5221	8.34892	7.87635	intergenic	-
2	87565860	87566047	3.46989	3.61926	3.18276	TSS	ENSSSCG00000014095
2	87663021	87663235	5.05283	5.57564	5.45256	intergenic	-
2	88972515	88972709	8.27435	11.2235	13.6314	utr_3	ENSSSCG00000028536
2	89475511	89475964	2.02297	3.00394	2.1492	intergenic	ENSSSCG00000014110
2	89746581	89747027	13.9365	10.7343	8.76898	intergenic	-
2	89814592	89814800	3.09449	8.05964	7.83505	intergenic	-
2	90084385	90084578	5.28753	8.28849	24.0382	intergenic	-
2	90084699	90085436	9.65203	7.24809	8.71264	intergenic	-
2	92676547	92676763	14.8888	15.2182	6.88902	intron	ENSSSCG00000014133
2	97400264	97400842	17.4406	17.2176	18.6299	TSS	ENSSSCG00000014146
2	100771048	100771292	5.02134	5.75212	8.1573	CDS	ENSSSCG00000024193
2	101571418	101571962	16.6045	20.9056	15.9754	utr_3	ENSSSCG00000014156
2	103838402	103838764	4.61452	5.26605	4.34429	intergenic	-
2	103838963	103839570	7.00608	5.21142	6.52166	CDS	ENSSSCG00000014157
2	103847945	103848527	11.9474	16.0236	14.9377	Stop	ENSSSCG00000014157
2	106219985	106220195	2.51228	1.37751	2.99487	intergenic	ENSSSCG00000029805
2	106416441	106416643	2.74138	3.2278	4.23234	CDS	ENSSSCG00000014168
2	106474995	106475258	9.24455	8.25214	7.97896	TSS	ENSSSCG00000014168
2	107641421	107641659	3.16419	6.0361	5.03899	CDS	ENSSSCG00000014175
2	108921206	108921432	21.5611	28.1538	30.141	CDS	ENSSSCG00000014176
2	108970518	108970718	3.66022	9.45545	5.05681	Stop	ENSSSCG00000014177
2	109063850	109064046	4.11028	3.21575	3.55443	intergenic	-
2	110536922	110537154	6.28543	4.74128	6.37599	CDS	ENSSSCG00000014179
2	110737486	110737714	9.37494	18.7058	26.5593	Stop	ENSSSCG00000014180
2	112821608	112821820	5.77189	9.29519	8.20816	CDS	ENSSSCG00000024089
2	117935829	117936087	4.19774	5.20624	5.65356	CDS	ENSSSCG00000014190
2	119133730	119134402	6.53961	5.23384	5.94047	utr_5	ENSSSCG00000014195
2	120041380	120041636	3.01142	4.22067	3.50208	Stop	ENSSSCG00000014197
2	121358571	121358771	18.6799	23.1444	28.1423	intergenic	-
2	121570044	121570392	3.00838	4.60086	3.97845	CDS	ENSSSCG00000014207
2	121578944	121579296	7.42099	10.6831	7.11825	nc_exon	ENSSSCG00000024866
2	123464197	123464413	2.73024	2.20701	3.57275	CDS	ENSSSCG00000014213
2	123612383	123612482	1.08904	1.62695	1.46574	Stop	ENSSSCG00000014213
2	124204391	124204608	7.9757	10.9381	9.20976	Stop	ENSSSCG00000014215
2	124598803	124598990	6.39496	5.12389	7.77971	intergenic	-
2	124599832	124600412	4.31924	5.75895	4.62293	intergenic	-
2	124611184	124611694	16.1913	23.1225	21.5757	Stop	ENSSSCG00000014216
2	124628842	124629336	27.3858	33.3375	30.3887	Stop	ENSSSCG00000014217
2	124629494	124630167	12.4805	15.6938	16.0499	CDS	ENSSSCG00000014217
2	124682224	124682427	2.99891	3.95186	4.40308	Stop	ENSSSCG00000014218
2	124851310	124851506	4.6447	6.92717	6.69357	TSS	ENSSSCG00000014220
2	125468575	125469652	7.40194	9.50684	10.0077	CDS	ENSSSCG00000014224
2	128460875	128461063	8.18559	8.832	16.0938	CDS	ENSSSCG00000027857
2	128722479	128722759	24.4367	25.8922	46.4348	Stop	ENSSSCG00000014227
2	131120434	131120668	11.094	10.6528	10.1869	CDS	ENSSSCG00000014235
2	132183932	132184144	6.94893	6.53523	6.4004	Stop	ENSSSCG00000014239
2	133297347	133297567	17.9358	17.5528	23.1169	CDS	ENSSSCG00000014242
2	133299138	133299292	9.00764	23.2078	7.43531	CDS	ENSSSCG00000014242
2	133396603	133396842	22.3005	26.6319	17.479	TSS	ENSSSCG00000014242
2	134840595	134840803	10.6442	12.2855	8.28924	intron	ENSSSCG00000022893
2	134987271	134987486	3.41573	3.71226	3.82304	intergenic	-
2	135014243	135014442	2.07767	3.21575	2.38583	CDS	ENSSSCG00000014244
2	135177484	135177721	2.28967	4.04701	3.21748	Stop	ENSSSCG00000014249
2	135853860	135854165	3.6947	4.86378	5.67955	Stop	ENSSSCG00000014252
2	136368510	136368761	13.7738	18.2075	34.7381	CDS	ENSSSCG00000014255
2	137198453	137198670	3.8829	3.80456	4.09091	TSS	ENSSSCG00000014258
2	137866967	137867158	27.6351	12.127	24.6245	CDS	ENSSSCG00000014262
2	139034625	139034827	6.86168	7.79934	9.98799	CDS	ENSSSCG00000014267
2	139885716	139885939	9.53613	9.32119	9.05828	TSS	ENSSSCG00000020915
2	140218473	140218718	6.87379	5.78612	7.12135	intergenic	-
2	140230382	140230625	14.0533	12.6575	10.1869	Stop	ENSSSCG00000014277
2	140267443	140267669	17.9211	12.5007	18.9481	intergenic	-
2	140572807	140573006	10.5783	8.04333	9.42263	intergenic	-
2	140618901	140619199	7.18248	13.3736	9.66503	CDS	ENSSSCG00000014287
2	140620174	140620546	6.2697	6.37521	4.96414	CDS	ENSSSCG00000014287
2	140620754	140620978	4.19774	4.35145	4.60363	CDS	ENSSSCG00000014287
2	140650069	140650444	7.49596	9.83177	8.97034	CDS	ENSSSCG00000014288
2	140650574	140650911	8.10445	9.84708	11.1496	CDS	ENSSSCG00000014288
2	140654317	140654801	3.46613	4.4182	3.30002	intergenic	-
2	140664347	140664574	3.20733	4.52435	3.58152	intergenic	-
2	140768254	140768528	4.09779	8.08468	6.15612	CDS	ENSSSCG00000014291
2	140803979	140804191	5.82511	5.96048	7.72789	TSS	ENSSSCG00000014291
2	141864728	141865010	4.86839	5.59875	6.77391	CDS	ENSSSCG00000014295
2	142257182	142257403	3.92156	3.29349	3.63126	intron	ENSSSCG00000014300
2	142257182	142257403	3.92156	3.29349	3.63126	intron	ENSSSCG00000014302
2	142257182	142257403	3.92156	3.29349	3.63126	utr_5	ENSSSCG00000014300
2	142441730	142442384	7.74967	9.18214	7.96049	CDS	ENSSSCG00000014303
2	142444122	142444445	17.3576	23.8842	18.5831	utr_3	ENSSSCG00000014303
2	142464025	142464224	2.33922	2.888	3.07805	Stop	ENSSSCG00000014305
2	142510482	142510694	3.02087	4.2556	4.41677	CDS	ENSSSCG00000014304
2	142566103	142566289	1.83651	3.00869	3.97845	intergenic	-
2	142573728	142573926	6.33043	3.0912	4.1224	TSS	ENSSSCG00000014306
2	142575703	142575961	4.6602	6.63155	7.77143	CDS	ENSSSCG00000014306
2	142654174	142654396	3.50325	2.65071	2.86699	intergenic	-
2	142660906	142661326	7.04528	7.25711	9.23844	CDS	ENSSSCG00000030393
2	142662964	142663220	14.6158	14.6856	16.7754	intergenic	-
2	142676796	142676979	4.78418	5.53697	6.44927	utr_5	ENSSSCG00000026106
2	142687307	142687657	9.51711	7.38552	7.83878	CDS	ENSSSCG00000026106
2	142694741	142695133	3.79119	5.1496	5.29337	Stop	ENSSSCG00000026106
2	142698899	142699221	16.4823	6.74943	12.7213	intergenic	-
2	145356315	145356645	3.77796	7.02225	6.15612	intergenic	-
2	145357101	145357343	4.63782	5.05008	7.18214	intergenic	-
2	145357634	145357834	12.3901	13.0529	23.9209	utr_3	ENSSSCG00000014321
2	145502808	145504025	7.02759	6.82645	6.6308	CDS	ENSSSCG00000014322
2	145887712	145887947	3.74029	6.58033	7.33585	CDS	ENSSSCG00000014327
2	146045579	146045776	10.6109	15.7889	7.29423	CDS	ENSSSCG00000014331
2	146082154	146082342	3.53698	4.69626	3.48521	CDS	ENSSSCG00000014331
2	146087199	146087508	7.4546	5.56764	5.49654	CDS	ENSSSCG00000014331
2	146114722	146114909	1.95483	2.98145	2.55254	intergenic	-
2	146158555	146158892	8.89899	10.3404	14.0711	Stop	ENSSSCG00000014336
2	146183976	146184189	55.9698	33.9239	175.009	intergenic	-
2	146218916	146219100	4.38185	6.078	5.81411	intron	ENSSSCG00000014337
2	146629763	146630047	10.986	10.4772	10.737	intergenic	-
2	147195774	147196028	12.3723	15.9031	28.4843	intergenic	-
2	147228793	147229072	7.05038	7.90916	5.98145	intergenic	-
2	147318099	147318621	3.49926	3.69615	3.97552	CDS	ENSSSCG00000014357
2	147318810	147318995	3.01219	3.47532	4.24727	Stop	ENSSSCG00000014357
2	147320264	147320485	2.97904	3.14714	2.8408	intron	ENSSSCG00000014357
2	147405171	147405463	7.92293	7.25971	7.9874	intergenic	-
2	147794690	147794918	6.18	5.3898	5.79287	intergenic	-
2	147800801	147801333	12.7621	10.1274	11.2402	TSS	ENSSSCG00000021989
2	147801926	147802238	5.90997	4.93264	6.1761	intergenic	ENSSSCG00000021989
2	148109881	148110209	9.04237	8.78507	9.17845	TSS	ENSSSCG00000014364
2	148231523	148231773	3.16986	4.87608	6.05561	CDS	ENSSSCG00000014364
2	148264176	148264412	11.4438	8.75049	13.3173	intergenic	ENSSSCG00000014366
2	148266998	148267675	3.93022	5.48731	4.52948	TSS	ENSSSCG00000014367
2	148270397	148270555	1.28731	2.39226	2.51703	intergenic	-
2	148270638	148270998	2.45612	1.48089	1.90783	intron	ENSSSCG00000014368
2	148292310	148292906	3.8806	4.09824	4.04321	nc_exon	ENSSSCG00000014369
2	148315286	148315629	5.5317	4.63564	5.6231	CDS	ENSSSCG00000014372
2	148328253	148328635	9.30921	7.6335	8.93707	Stop	ENSSSCG00000014372
2	148331921	148332127	3.33135	4.86759	4.70807	Stop	ENSSSCG00000014375
2	148334558	148334786	2.67129	2.85342	2.20306	CDS	ENSSSCG00000014375
2	148353706	148353906	7.1781	8.15262	6.50025	intergenic	-
2	149149811	149150163	5.42125	6.00245	6.33099	Stop	ENSSSCG00000028168
2	149150867	149151295	11.2855	13.5641	15.1931	intergenic	ENSSSCG00000028168
2	149267187	149267383	22.4579	16.1694	10.4277	CDS	ENSSSCG00000023932
2	149333670	149333949	6.11409	7.60911	8.59901	intergenic	-
2	149334777	149335001	5.08147	12.2289	6.65448	intergenic	-
2	149335469	149335699	2.17383	3.74861	3.19473	intergenic	-
2	149360679	149360902	3.95134	2.64206	3.20998	intergenic	-
2	149473442	149473702	23.8671	15.4648	20.8008	TSS	ENSSSCG00000014387
2	149507131	149507323	3.18867	3.10949	2.89891	Stop	ENSSSCG00000014391
2	149528198	149528441	2.76872	2.00796	3.16051	CDS	ENSSSCG00000014391
2	149680323	149680511	23.0875	5.38979	8.71451	intergenic	-
2	149682515	149682877	2.93842	6.78479	4.5755	intergenic	-
2	149690594	149690931	2.73489	1.82911	2.55489	Stop	ENSSSCG00000022289
2	149691852	149692088	4.09935	7.03843	3.77118	CDS	ENSSSCG00000022289
2	149692305	149692925	6.34126	6.26167	6.10493	CDS	ENSSSCG00000022289
2	149695884	149696113	14.2985	15.5035	14.7272	CDS	ENSSSCG00000022289
2	149752410	149752926	12.7037	13.2848	16.9124	Stop	ENSSSCG00000014395
2	149762862	149763062	4.971	6.1824	4.771	CDS	ENSSSCG00000014395
2	149764074	149764272	3.06085	4.8384	6.18753	CDS	ENSSSCG00000014395
2	149764919	149765270	18.0652	17.5961	10.6661	CDS	ENSSSCG00000014395
2	149776577	149776807	2.12008	2.76355	2.20582	intron	ENSSSCG00000014394
2	150063032	150063218	6.88691	7.90634	13.2503	intergenic	-
2	150065409	150066235	5.15347	6.93203	6.67051	intergenic	ENSSSCG00000014397
2	150066502	150066718	3.34819	4.70691	6.32362	CDS	ENSSSCG00000014397
2	151154923	151155261	4.04144	6.568	4.96939	CDS	ENSSSCG00000014401
2	151155471	151155825	7.77686	10.0302	10.6661	CDS	ENSSSCG00000014401
2	151158338	151158542	19.6769	4.8384	6.84711	TSS	ENSSSCG00000014401
2	156392400	156392603	3.52068	2.55306	3.57641	CDS	ENSSSCG00000014427
2	156394120	156394739	9.96652	12.8968	10.6662	CDS	ENSSSCG00000014427
2	157182660	157182973	4.74189	4.23689	4.48517	intron	ENSSSCG00000014430
2	157186152	157186277	5.17946	5.09539	4.0385	intergenic	-
2	157282644	157282876	8.26827	7.77062	8.30143	Stop	ENSSSCG00000014432
2	157304799	157305056	9.83844	7.13354	6.37598	intergenic	-
2	157307171	157307390	6.73847	8.51703	5.52096	Stop	ENSSSCG00000014434
2	157347048	157347343	8.47943	10.1908	8.75256	intergenic	-
2	157380531	157380735	5.05583	7.2037	6.04677	intergenic	-
2	157380874	157381212	3.13749	4.40544	4.63772	intergenic	-
2	157428079	157428300	6.62689	5.11805	5.7093	utr_5	ENSSSCG00000014435
2	157810601	157810817	4.0478	3.91645	4.72704	CDS	ENSSSCG00000014440
2	157909530	157909704	2.60887	2.86783	2.43266	utr_3	ENSSSCG00000031039
2	157945593	157945923	2.07925	1.48673	2.12742	intron	ENSSSCG00000014442
2	158053138	158053358	6.90595	8.0567	6.332	intron	ENSSSCG00000014442
2	158053138	158053358	6.90595	8.0567	6.332	utr_3	ENSSSCG00000028049
2	158113572	158113781	11.8061	9.59784	10.8884	utr_3	ENSSSCG00000022741
2	158114165	158114385	5.77718	9.01318	7.80508	utr_3	ENSSSCG00000022741
2	158453451	158453787	12.8502	8.18554	9.5837	CDS	ENSSSCG00000014450
2	158464806	158465186	7.49294	4.6404	5.7164	intron	ENSSSCG00000014450
2	158473203	158473643	10.7042	7.31645	7.5903	intron	ENSSSCG00000014450
2	158474424	158474649	4.47927	3.8605	2.91316	intron	ENSSSCG00000014450
2	159692568	159692847	7.60838	12.0721	9.56399	CDS	ENSSSCG00000014539
2	159693362	159693612	5.3279	6.61041	6.87067	CDS	ENSSSCG00000014539
2	159733837	159734152	3.95986	4.56547	5.5496	intergenic	-
2	159750937	159751324	2.37887	3.04758	2.55736	CDS	ENSSSCG00000014538
2	159751467	159752143	7.83409	8.50666	8.74412	CDS	ENSSSCG00000014538
2	159756840	159757047	8.78206	14.5265	8.29194	intergenic	-
2	162096843	162097051	8.03769	7.0166	6.89266	utr_3	ENSSSCG00000014565
2	162183951	162184170	2.70132	2.44243	2.31332	Stop	ENSSSCG00000014558
2	162185823	162186160	8.85	10.1455	9.85431	utr_3	ENSSSCG00000014558
2	162191510	162191698	4.08727	3.68183	3.55601	CDS	ENSSSCG00000014557
2	162196343	162196591	4.73274	6.23526	5.45656	intergenic	-
2	162334741	162334979	5.09725	4.47036	4.57443	intergenic	-
3	87222	87456	7.57925	12.2783	10.6161	intergenic	-
3	93438	94094	6.50295	7.34241	6.56548	intergenic	-
3	120413	120919	11.183	9.27938	13.5773	intergenic	ENSSSCG00000020813
3	121070	121373	5.6961	6.165	7.04615	intergenic	-
3	152554	152777	7.24609	23.0003	16.7583	intergenic	-
3	191662	191926	8.50594	3.87772	8.25913	Stop	ENSSSCG00000007542
3	333630	333826	3.66685	3.35845	3.00886	intergenic	-
3	726892	727131	2.95589	3.16436	4.01614	intron	ENSSSCG00000007546
3	730434	730735	3.78962	8.62819	3.25583	intron	ENSSSCG00000007546
3	731324	731715	3.0902	2.78548	2.06719	CDS	ENSSSCG00000007546
3	733101	733308	8.04566	7.17677	7.64441	intron	ENSSSCG00000007546
3	734761	734981	4.48395	2.1841	5.37439	intron	ENSSSCG00000007546
3	736988	737247	51.0725	35.1057	11.4328	intron	ENSSSCG00000007546
3	737543	737968	3.68418	3.45869	3.28046	intron	ENSSSCG00000007546
3	738150	739290	8.89669	9.05343	4.07914	intron	ENSSSCG00000007546
3	740244	740454	2.62868	2.22839	2.63834	intron	ENSSSCG00000007546
3	742508	742719	6.59173	4.98083	5.55995	Stop	ENSSSCG00000007546
3	762437	763011	7.45143	5.3636	5.55864	intergenic	ENSSSCG00000007550
3	763335	763601	11.5034	7.11914	15.83	intergenic	-
3	764247	764501	10.8172	9.211	21.1067	intergenic	-
3	800382	800724	4.12278	2.97748	4.71703	intergenic	-
3	809468	810057	4.12916	4.44531	4.29168	Stop	ENSSSCG00000007551
3	810321	810709	6.18392	7.94333	6.03639	intergenic	-
3	810921	811632	9.21831	7.38197	7.20914	intergenic	-
3	873778	873989	2.63738	2.36023	3.35597	utr_3	ENSSSCG00000007554
3	1073642	1073863	6.67822	8.13749	13.4555	CDS	ENSSSCG00000007557
3	1138012	1138226	8.79443	10.2478	14.3169	intergenic	-
3	1147160	1147660	3.26206	3.20035	3.15665	Stop	ENSSSCG00000007559
3	1147952	1148994	12.2927	10.2527	11.4224	intergenic	-
3	1149661	1149885	5.71942	3.39692	4.17737	intergenic	-
3	1150133	1150387	12.0685	9.98696	10.0648	intergenic	-
3	1151624	1151867	6.2966	4.50757	3.93164	intergenic	-
3	1151999	1152706	22.4332	23.0288	27.8545	intergenic	ENSSSCG00000007560
3	2018219	2018654	3.9902	6.74855	6.07496	Stop	ENSSSCG00000023433
3	2019275	2019553	4.42063	4.56306	5.27667	utr_3	ENSSSCG00000023433
3	2019828	2020296	3.51903	5.98064	4.03892	utr_3	ENSSSCG00000023433
3	2021001	2021376	11.9373	7.90177	21.8762	utr_3	ENSSSCG00000023433
3	2110311	2110560	10.3486	10.9873	10.2602	Stop	ENSSSCG00000007563
3	2110732	2110937	11.9731	11.0967	16.4896	CDS	ENSSSCG00000007563
3	2173740	2173971	6.67716	7.02507	7.37839	intergenic	ENSSSCG00000007565
3	2198186	2198522	8.60147	11.3717	11.0414	intergenic	-
3	2199870	2200263	2.86131	2.15815	2.00608	intergenic	-
3	2285261	2285574	11.019	19.3154	13.2503	Stop	ENSSSCG00000007567
3	4263705	4264556	9.93386	11.0549	9.85578	intergenic	ENSSSCG00000007576
3	4266072	4266336	4.53726	3.69585	4.81381	intergenic	-
3	4267685	4267954	5.08147	3.57809	3.89469	intergenic	-
3	4289482	4289702	3.42986	5.95496	4.42471	Stop	ENSSSCG00000007577
3	4517328	4517724	6.57416	8.53862	10.6369	Stop	ENSSSCG00000007580
3	4519436	4519687	23.1575	19.0228	22.9755	utr_3	ENSSSCG00000007580
3	4565895	4566091	1.6491	2.25895	1.96582	intergenic	-
3	4570001	4570741	7.78501	7.21012	7.84569	CDS	ENSSSCG00000022553
3	4580237	4580471	9.3283	10.1455	8.51963	intron	ENSSSCG00000022553
3	4584580	4584788	4.02756	3.11282	2.7043	intron	ENSSSCG00000022553
3	4594511	4595137	5.60345	5.63936	5.44508	intron	ENSSSCG00000022553
3	4608068	4608250	9.11096	8.6078	7.5046	intron	ENSSSCG00000022553
3	4608813	4608937	6.96125	9.25663	8.11954	intron	ENSSSCG00000022553
3	4614060	4614404	12.3861	11.6263	12.1715	intergenic	-
3	4636465	4636790	3.75172	3.60606	3.7926	intergenic	ENSSSCG00000007583
3	4638762	4639023	32.2096	22.8639	27.8836	intergenic	-
3	4690437	4690673	8.34296	13.0782	11.9151	intergenic	-
3	5136790	5137007	12.1003	9.21547	9.26349	TSS	ENSSSCG00000028354
3	5169900	5170162	8.05325	10.5268	8.92271	utr_3	ENSSSCG00000024245
3	5170986	5171176	4.1245	4.65286	3.51778	CDS	ENSSSCG00000024245
3	5196572	5196846	8.26429	6.40432	4.39723	CDS	ENSSSCG00000007590
3	5289220	5289421	10.6628	12.8695	13.0817	TSS	ENSSSCG00000025940
3	5383727	5383945	21.4784	19.9144	14.3298	intergenic	-
3	5454219	5454426	3.6872	3.0912	4.42235	CDS	ENSSSCG00000007599
3	5454219	5454426	3.6872	3.0912	4.42235	intron	ENSSSCG00000007602
3	5455164	5455471	10.6735	13.9433	13.6447	CDS	ENSSSCG00000007599
3	5455164	5455471	10.6735	13.9433	13.6447	intron	ENSSSCG00000007602
3	5455832	5456410	7.55262	8.17275	10.1513	CDS	ENSSSCG00000007599
3	5455832	5456410	7.55262	8.17275	10.1513	intron	ENSSSCG00000007602
3	5456723	5456959	6.19166	4.46453	6.78429	CDS	ENSSSCG00000007599
3	5456723	5456959	6.19166	4.46453	6.78429	intron	ENSSSCG00000007602
3	5464942	5465258	12.1597	9.81258	9.44449	intron	ENSSSCG00000007602
3	5464942	5465258	12.1597	9.81258	9.44449	Stop	ENSSSCG00000007599
3	5470598	5470807	19.8557	15.4296	18.3902	intron	ENSSSCG00000007600
3	5470598	5470807	19.8557	15.4296	18.3902	intron	ENSSSCG00000007602
3	5470598	5470807	19.8557	15.4296	18.3902	TSS	ENSSSCG00000007600
3	5471112	5471984	5.04821	4.82244	4.95687	intron	ENSSSCG00000007602
3	5472943	5473178	5.72239	7.16152	5.27667	intron	ENSSSCG00000007602
3	6086930	6087425	3.02532	5.07274	3.92309	Stop	ENSSSCG00000007606
3	6096716	6097083	7.7958	7.12134	7.11094	utr_3	ENSSSCG00000030153
3	6097778	6098018	10.4391	18.0122	17.0863	utr_3	ENSSSCG00000030153
3	6534928	6535229	2.79054	2.97231	4.32076	CDS	ENSSSCG00000007617
3	6535777	6536062	5.7569	7.13354	9.2342	CDS	ENSSSCG00000007617
3	6548466	6548663	5.73691	5.152	3.60573	intron	ENSSSCG00000007617
3	6581309	6582136	7.29607	8.94257	10.5929	CDS	ENSSSCG00000007618
3	6589762	6589991	16.0913	21.7176	21.0091	intron	ENSSSCG00000007618
3	6589762	6589991	16.0913	21.7176	21.0091	utr_3	ENSSSCG00000022023
3	6616289	6616511	7.49596	8.03185	6.95311	intron	ENSSSCG00000007618
3	6622525	6622719	5.16885	5.69304	4.16881	intron	ENSSSCG00000007618
3	6623446	6623635	3.03311	3.26762	2.59016	Stop	ENSSSCG00000007618
3	6679054	6679255	6.059	4.39903	6.47745	TSS	ENSSSCG00000007615
3	6688943	6689199	9.04363	4.75571	6.94299	CDS	ENSSSCG00000007622
3	6693110	6693412	6.21943	7.63483	6.22941	Stop	ENSSSCG00000007622
3	6710469	6710687	6.7359	5.84952	5.34877	utr_3	ENSSSCG00000023257
3	6712299	6712502	5.06394	3.45066	3.21242	utr_3	ENSSSCG00000023257
3	7093442	7093640	9.75356	8.61307	10.4734	CDS	ENSSSCG00000007637
3	7129117	7129554	5.36771	5.79554	6.76158	Stop	ENSSSCG00000007642
3	7189999	7190234	4.52914	2.29391	2.9952	CDS	ENSSSCG00000007643
3	7191692	7192004	16.3079	21.0491	23.1392	intergenic	-
3	7192514	7192823	5.63926	7.57068	6.82806	intergenic	-
3	7193058	7193347	6.89628	10.378	9.63647	intergenic	-
3	7193666	7194271	6.28916	10.2587	9.32375	intergenic	-
3	7359672	7359865	1.79903	2.30849	1.81186	intergenic	ENSSSCG00000007647
3	7359973	7360210	12.4433	7.64081	8.44269	CDS	ENSSSCG00000007647
3	7700122	7700831	13.8189	12.2063	13.3794	intron	ENSSSCG00000025164
3	7700122	7700831	13.8189	12.2063	13.3794	intron	ENSSSCG00000025958
3	7748773	7749264	8.56472	7.70683	9.25889	utr_5	ENSSSCG00000025164
3	7752060	7752541	20.3096	15.8235	16.8854	intergenic	-
3	7754932	7755153	8.1945	6.97502	4.39723	CDS	ENSSSCG00000030337
3	7755824	7756086	4.21958	3.30996	3.62771	CDS	ENSSSCG00000030337
3	7756718	7757031	6.07748	7.44513	8.86775	CDS	ENSSSCG00000030337
3	7759156	7759498	7.84406	4.05001	6.26605	Stop	ENSSSCG00000030337
3	7811329	7811721	14.3902	11.2378	11.1589	CDS	ENSSSCG00000007664
3	7833091	7833291	3.06434	2.38332	1.95632	intergenic	-
3	7841970	7842170	28.0724	6.38622	13.1917	intergenic	-
3	7842425	7842714	5.10242	4.8966	6.28176	intergenic	-
3	7845581	7845878	22.5838	12.3282	18.2799	CDS	ENSSSCG00000007667
3	7926564	7926756	1.53917	2.33754	3.59426	utr_5	ENSSSCG00000023255
3	7943516	7943821	2.80589	1.88677	1.92001	CDS	ENSSSCG00000007671
3	7947060	7947433	3.97802	2.9979	3.35574	CDS	ENSSSCG00000007671
3	7947659	7947960	9.98254	8.25192	8.69921	intron	ENSSSCG00000007671
3	8003024	8003690	6.76988	8.77184	9.09266	Stop	ENSSSCG00000007672
3	8116371	8116597	5.09544	3.40611	5.35382	TSS	ENSSSCG00000007675
3	8138756	8139320	9.40374	5.8542	6.8777	CDS	ENSSSCG00000023619
3	8153534	8153802	8.10549	5.84849	5.64743	CDS	ENSSSCG00000024789
3	8158659	8159015	12.7972	13.3397	26.5787	intergenic	-
3	9399966	9400153	11.1622	25.1101	15.0483	CDS	ENSSSCG00000007681
3	9467020	9467240	4.26544	7.50343	6.6914	CDS	ENSSSCG00000007682
3	9505525	9506265	17.8916	13.2231	15.5997	CDS	ENSSSCG00000021013
3	9547703	9547890	3.47121	4.21219	1.90965	Stop	ENSSSCG00000007684
3	9620772	9621048	3.27177	3.71396	3.70491	Stop	ENSSSCG00000024397
3	9784740	9784930	1.78687	2.03438	1.8996	CDS	ENSSSCG00000025430
3	9908085	9908312	1.28098	1.77258	1.69817	Stop	ENSSSCG00000007692
3	10280286	10280514	8.87983	9.58455	10.3335	utr_3	ENSSSCG00000007700
3	10314194	10314386	14.3105	6.8043	9.16478	CDS	ENSSSCG00000007705
3	10461735	10461937	2.44517	3.80456	4.09492	utr_3	ENSSSCG00000027342
3	10462406	10462816	5.08079	4.89708	5.02695	Stop	ENSSSCG00000027342
3	10501437	10501858	2.02649	2.29138	2.94482	CDS	ENSSSCG00000027342
3	10550432	10550656	3.97513	5.93641	4.24709	utr_3	ENSSSCG00000007708
3	10587059	10587524	3.44488	4.27343	4.02516	Stop	ENSSSCG00000007709
3	10598438	10598645	4.74576	3.67401	4.12502	utr_3	ENSSSCG00000007710
3	10600798	10601028	3.1483	2.10609	3.13592	intron	ENSSSCG00000007710
3	10655267	10655516	4.87096	6.08729	4.23361	Stop	ENSSSCG00000007712
3	10715297	10715615	3.91789	4.28786	5.98023	intergenic	-
3	10777088	10777839	7.6058	8.15267	8.65801	utr_3	ENSSSCG00000007718
3	10778280	10778595	3.43451	2.40219	2.68164	utr_5	ENSSSCG00000007718
3	10934353	10934674	5.63328	3.13483	3.45071	CDS	ENSSSCG00000025858
3	11029750	11029994	2.53423	1.93779	2.06165	Stop	ENSSSCG00000025966
3	11074198	11074411	5.16174	4.21345	5.49964	intergenic	-
3	11560607	11560808	2.28967	2.31257	2.83072	Stop	ENSSSCG00000028635
3	11634990	11635266	14.1365	8.49849	10.4591	CDS	ENSSSCG00000007723
3	11667741	11668123	2.91919	2.29801	2.29868	utr_3	ENSSSCG00000007723
3	11681271	11681541	6.07948	4.62888	4.14596	intergenic	-
3	14851241	14851681	11.8897	9.55257	12.5833	intergenic	-
3	14916993	14917207	4.20291	4.42311	4.12771	CDS	ENSSSCG00000007727
3	14943133	14944418	6.1118	6.94229	7.29793	CDS	ENSSSCG00000007727
3	16505467	16505748	4.97585	6.24825	3.84989	utr_3	ENSSSCG00000007736
3	16562421	16562725	7.402	11.2002	10.1475	Stop	ENSSSCG00000007735
3	16739205	16739367	3.81522	4.02219	4.34433	CDS	ENSSSCG00000007737
3	16770792	16771051	8.76194	5.65867	7.45837	intergenic	-
3	16890259	16890618	4.05072	3.2357	3.76306	intergenic	ENSSSCG00000007738
3	16924732	16924983	1.63496	1.95768	1.97515	TSS	ENSSSCG00000007739
3	16945068	16945256	3.36173	4.71765	3.69927	Stop	ENSSSCG00000028513
3	17016499	17016863	9.01214	8.28548	9.16522	TSS	ENSSSCG00000028513
3	17127487	17127656	3.38617	3.40824	3.60877	intergenic	-
3	17251910	17252127	13.8675	10.9381	17.2958	CDS	ENSSSCG00000029029
3	17341304	17341523	4.07529	3.59779	3.46605	CDS	ENSSSCG00000007753
3	17362708	17362963	15.4135	12.2697	10.8172	Stop	ENSSSCG00000025245
3	17499224	17499424	2.66167	2.07149	2.21576	nc_exon	ENSSSCG00000007762
3	17548715	17549003	2.97196	2.17865	2.25872	CDS	ENSSSCG00000030798
3	17549635	17550015	24.5093	16.3225	16.2628	CDS	ENSSSCG00000030798
3	17555642	17555981	14.8858	13.4734	12.0664	CDS	ENSSSCG00000030798
3	17556639	17556900	24.6367	17.68	18.4921	Stop	ENSSSCG00000030798
3	17729534	17729768	4.42262	6.50779	6.47273	CDS	ENSSSCG00000026817
3	17730208	17730603	5.9919	10.6821	9.8693	CDS	ENSSSCG00000026817
3	17731185	17731391	21.8882	9.61707	14.3224	CDS	ENSSSCG00000026817
3	17732459	17732704	15.58	12.6818	13.6314	CDS	ENSSSCG00000026817
3	17734334	17734545	8.60536	10.6528	14.335	CDS	ENSSSCG00000026817
3	17761516	17761767	9.87245	5.80356	8.81541	utr_5	ENSSSCG00000007768
3	17785684	17785934	10.4244	11.2023	7.91501	intergenic	-
3	17805383	17805624	5.83019	8.08468	6.39064	Stop	ENSSSCG00000028186
3	17806068	17806373	14.7795	12.0081	9.30363	utr_3	ENSSSCG00000028186
3	17807529	17807869	1.56136	1.42973	1.18432	utr_5	ENSSSCG00000007770
3	17816584	17816840	17.0532	15.0452	20.8868	intergenic	-
3	17823268	17823471	3.8979	4.26729	3.67933	CDS	ENSSSCG00000007782
3	17835961	17836506	4.19774	4.57576	5.90352	CDS	ENSSSCG00000007782
3	17842607	17842978	2.49344	1.98442	1.76877	CDS	ENSSSCG00000021238
3	17952119	17952319	13.8	12.3648	7.45614	intron	ENSSSCG00000007776
3	17953388	17953675	6.84039	5.08207	5.2547	utr_5	ENSSSCG00000007776
3	17953388	17953675	6.84039	5.08207	5.2547	utr_5	ENSSSCG00000020178
3	18056448	18056717	46.5249	37.0944	25.328	intron	ENSSSCG00000007780
3	18059592	18059875	11.8061	25.6501	17.7233	CDS	ENSSSCG00000007780
3	18061745	18061954	1.79358	2.08441	2.34978	Stop	ENSSSCG00000007780
3	18062549	18062995	4.34085	3.51743	3.20572	utr_3	ENSSSCG00000007780
3	18063342	18063887	11.2202	11.1552	13.294	utr_3	ENSSSCG00000007780
3	18087511	18087695	4.28705	3.51921	4.73667	Stop	ENSSSCG00000007788
3	18111540	18111769	1.98955	3.17046	2.4429	CDS	ENSSSCG00000007789
3	18111946	18112400	5.92008	9.41507	8.28332	CDS	ENSSSCG00000007789
3	18113231	18113488	8.0514	8.31781	9.919	CDS	ENSSSCG00000007789
3	18126761	18127104	3.66812	4.67548	5.06218	CDS	ENSSSCG00000007789
3	18156573	18156793	2.8588	2.02702	3.24006	intron	ENSSSCG00000007789
3	18188618	18188813	9.31036	6.3238	5.54433	Stop	ENSSSCG00000025794
3	18188986	18189251	6.22164	6.03657	7.68886	CDS	ENSSSCG00000025794
3	18198343	18198565	13.905	11.6375	12.1593	intergenic	-
3	18199396	18200005	13.0667	15.5409	20.4807	intergenic	-
3	18223186	18223406	4.40179	6.52209	2.99663	TSS	ENSSSCG00000007785
3	18226366	18226629	8.56776	9.88216	8.0178	CDS	ENSSSCG00000007785
3	18227217	18227419	4.29033	6.97502	3.05058	intergenic	ENSSSCG00000007785
3	18241355	18241710	5.52334	6.26633	7.47529	intergenic	-
3	18242137	18242305	3.63266	2.85342	2.66582	intergenic	-
3	18250810	18251863	5.03425	6.78549	5.7876	CDS	ENSSSCG00000007794
3	18298379	18298607	13.6426	15.5353	10.9638	Stop	ENSSSCG00000007797
3	18303276	18303920	12.4883	11.3036	11.0904	Stop	ENSSSCG00000023349
3	18304919	18305321	3.5407	5.44492	5.90056	CDS	ENSSSCG00000023349
3	18305618	18306175	16.5855	9.32116	13.2816	utr_5	ENSSSCG00000023349
3	18312073	18312297	5.50953	6.48812	6.26861	Stop	ENSSSCG00000007796
3	18323486	18324224	3.88291	4.87904	4.82414	intergenic	ENSSSCG00000007795
3	18324732	18325113	3.88155	3.79006	4.2161	CDS	ENSSSCG00000007795
3	18324941	18325399	3.59424	3.26608	3.73594	intron	ENSSSCG00000007795
3	18361453	18361650	8.59224	13.1575	18.2171	CDS	ENSSSCG00000007801
3	18363942	18364164	8.29053	4.61022	6.18055	intron	ENSSSCG00000007800
3	18383371	18383750	6.34157	4.83494	6.22511	utr_5	ENSSSCG00000007798
3	18384042	18384542	9.23051	9.69953	10.5534	CDS	ENSSSCG00000007798
3	18393541	18393979	6.18666	4.32336	4.20376	Stop	ENSSSCG00000007798
3	18398223	18398510	6.33944	4.5638	5.45411	CDS	ENSSSCG00000007791
3	18398914	18399209	2.98012	4.19477	3.53185	Stop	ENSSSCG00000007791
3	18498590	18498794	1.80067	1.65593	1.63693	utr_5	ENSSSCG00000027629
3	18502138	18502381	6.46306	5.54207	5.65359	utr_3	ENSSSCG00000027629
3	18515084	18515313	4.32701	3.57711	3.43746	CDS	ENSSSCG00000027946
3	18516891	18517174	4.12959	2.71855	3.42705	CDS	ENSSSCG00000027946
3	18519573	18519807	3.09264	2.26619	2.90454	CDS	ENSSSCG00000027946
3	18537427	18538141	9.15787	5.84033	6.49813	TSS	ENSSSCG00000022996
3	18544635	18544914	6.02065	5.79119	5.1618	Stop	ENSSSCG00000025321
3	18547175	18547524	2.45476	2.24075	2.29953	CDS	ENSSSCG00000025321
3	18547728	18548405	4.72428	4.82363	4.56826	intron	ENSSSCG00000025321
3	18589234	18589457	4.51975	5.40016	5.35271	intergenic	-
3	18591195	18591423	20.9887	9.57552	16.4288	CDS	ENSSSCG00000027454
3	18707414	18707677	2.8022	2.27272	2.37184	CDS	ENSSSCG00000007803
3	18721458	18721948	15.6783	15.3517	16.5882	CDS	ENSSSCG00000007804
3	18727725	18728001	8.67801	5.65805	5.78834	Stop	ENSSSCG00000007804
3	18753947	18754149	2.9734	3.31259	2.09113	Stop	ENSSSCG00000007806
3	18755485	18755691	13.7738	10.0601	8.38615	CDS	ENSSSCG00000007806
3	18764433	18764663	3.17215	2.82771	1.67746	CDS	ENSSSCG00000007806
3	18796388	18796613	6.47151	4.79092	5.03238	TSS	ENSSSCG00000007808
3	18816257	18816448	7.51619	5.26299	6.50025	TSS	ENSSSCG00000007809
3	19004442	19004701	5.50953	6.47963	4.52286	utr_5	ENSSSCG00000007812
3	19058711	19058923	2.35719	3.24251	4.40823	CDS	ENSSSCG00000007812
3	19111834	19112203	2.55093	2.63207	2.48417	intergenic	ENSSSCG00000007812
3	19648303	19648540	4.99386	3.87093	5.30181	CDS	ENSSSCG00000007815
3	19668291	19668481	2.43792	1.9375	2.46674	CDS	ENSSSCG00000007815
3	19846693	19847435	9.39435	11.5019	8.20146	intergenic	ENSSSCG00000007817
3	19847735	19848728	3.74029	4.86361	3.98333	CDS	ENSSSCG00000007817
3	19872165	19872365	5.02229	2.85342	4.44896	utr_3	ENSSSCG00000007818
3	19872584	19872834	7.24363	4.90433	5.507	Stop	ENSSSCG00000007818
3	19886454	19886708	4.59127	4.50539	6.08847	CDS	ENSSSCG00000007818
3	22540357	22540521	3.32821	4.39336	3.40431	CDS	ENSSSCG00000007830
3	22570193	22571099	18.9873	17.4847	16.4714	intergenic	-
3	23541589	23541813	22.5628	27.9	25.1961	CDS	ENSSSCG00000030424
3	24288297	24288681	8.99764	11.3621	12.0217	utr_3	ENSSSCG00000007839
3	24291192	24291404	3.71465	3.3918	2.96009	Stop	ENSSSCG00000007839
3	24335353	24335576	8.51471	9.48167	8.1532	intron	ENSSSCG00000007839
3	24335353	24335576	8.51471	9.48167	8.1532	Stop	ENSSSCG00000007840
3	24342031	24342309	10.9714	9.83677	11.9125	CDS	ENSSSCG00000007840
3	24342031	24342309	10.9714	9.83677	11.9125	intron	ENSSSCG00000007839
3	24817576	24817790	5.46321	4.97519	4.39723	intergenic	-
3	25545985	25546198	12.6739	12.3648	15.83	intron	ENSSSCG00000007849
3	25968402	25968741	3.86313	4.84542	4.75551	CDS	ENSSSCG00000007854
3	25970698	25971192	8.82601	8.36745	9.4174	Stop	ENSSSCG00000007854
3	26077819	26078226	7.5346	8.28468	10.9727	utr_3	ENSSSCG00000024748
3	26138371	26138477	1.76571	2.32328	1.96919	Stop	ENSSSCG00000007858
3	26735167	26735393	5.78607	4.65557	9.2635	utr_3	ENSSSCG00000007864
3	26750282	26750785	9.81528	12.9619	11.0214	CDS	ENSSSCG00000007864
3	26922021	26922215	5.05751	8.20163	8.392	Stop	ENSSSCG00000029212
3	29067651	29067873	7.11515	6.69193	5.88553	intergenic	-
3	29072450	29072713	8.66341	5.98119	6.5079	CDS	ENSSSCG00000007874
3	29646434	29646608	2.74206	3.49489	2.94532	intron	ENSSSCG00000007878
3	29976916	29977117	11.5437	18.8765	18.615	intergenic	-
3	30060356	30060565	3.39817	4.43865	2.83692	intron	ENSSSCG00000023626
3	30289070	30289364	29.1043	24.5058	21.237	utr_3	ENSSSCG00000007881
3	30290691	30290916	4.8853	6.07268	10.7532	CDS	ENSSSCG00000007881
3	32030544	32030822	4.60158	3.90778	3.14011	intergenic	-
3	32129743	32129973	8.72342	9.22316	6.6325	intron	ENSSSCG00000007888
3	32134368	32134561	4.39628	6.76987	7.21146	intergenic	-
3	32449531	32449724	2.36513	2.82903	2.35265	Stop	ENSSSCG00000028743
3	32599321	32599525	9.44491	13.7915	20.2273	utr_3	ENSSSCG00000022149
3	32604473	32604684	27.4952	10.7003	10.2393	TSS	ENSSSCG00000022149
3	33292794	33293032	3.20354	4.60936	4.44352	intergenic	-
3	33293474	33293688	3.26279	6.09849	4.68094	intergenic	-
3	33294176	33294388	6.52782	12.4149	8.83845	intergenic	-
3	34446987	34447621	14.1706	9.7917	9.99821	intergenic	ENSSSCG00000028454
3	34603233	34603433	25.1864	33.1314	14.4009	intron	ENSSSCG00000021710
3	34622773	34623590	5.59331	5.65051	5.72874	Stop	ENSSSCG00000021288
3	34742788	34743125	11.3696	7.73106	9.12968	TSS	ENSSSCG00000007907
3	34778436	34778908	5.37219	5.29047	5.41294	utr_3	ENSSSCG00000026710
3	34790632	34791862	4.19774	4.71475	5.72974	utr_3	ENSSSCG00000021236
3	38384839	38385023	14.9544	14.6898	16.7975	CDS	ENSSSCG00000007925
3	38394167	38394499	4.46311	6.78069	6.26804	utr_3	ENSSSCG00000007925
3	38514368	38515411	6.92411	5.80655	6.32081	CDS	ENSSSCG00000007927
3	38515597	38516629	8.66756	6.52101	8.40071	CDS	ENSSSCG00000007927
3	38517352	38517604	3.17962	4.72772	3.7468	intergenic	-
3	38625935	38626107	1.83651	2.90937	1.93878	intergenic	-
3	38662403	38662764	6.23953	7.3627	8.28734	intergenic	ENSSSCG00000007931
3	38663041	38663257	2.83192	3.78097	5.17896	intergenic	-
3	38664987	38665262	6.93609	6.00947	6.21108	TSS	ENSSSCG00000007932
3	38670698	38670935	4.31153	4.62135	7.99083	utr_3	ENSSSCG00000007932
3	38745368	38745568	8.83274	16.526	7.62186	intron	ENSSSCG00000007939
3	38747728	38748014	7.15038	5.26785	6.9023	Stop	ENSSSCG00000007939
3	38754085	38754567	4.16966	3.97551	4.56433	intergenic	ENSSSCG00000007930
3	38812666	38812883	8.20598	5.57288	6.14552	TSS	ENSSSCG00000023603
3	38816790	38817544	4.25872	5.45283	4.22907	Stop	ENSSSCG00000023603
3	38896978	38897289	4.82485	5.46638	4.73445	CDS	ENSSSCG00000007942
3	38899090	38899395	5.6342	4.71791	4.8278	TSS	ENSSSCG00000007942
3	38926967	38927204	3.50958	8.28849	3.41433	intergenic	-
3	38930382	38930598	5.44981	4.02015	5.05682	TSS	ENSSSCG00000007943
3	38931045	38931248	5.79503	4.18983	4.52611	CDS	ENSSSCG00000007943
3	38938907	38939174	6.61268	8.10602	7.15617	intergenic	-
3	38973782	38974018	5.43428	4.45646	4.64484	TSS	ENSSSCG00000022874
3	39016831	39017527	4.89247	4.00015	3.9372	intron	ENSSSCG00000007944
3	39016831	39017527	4.89247	4.00015	3.9372	Stop	ENSSSCG00000025561
3	39017756	39018882	5.42052	6.30723	7.19703	CDS	ENSSSCG00000025561
3	39017756	39018882	5.42052	6.30723	7.19703	intron	ENSSSCG00000007944
3	39051683	39051884	2.73835	2.9204	2.9594	TSS	ENSSSCG00000023653
3	39069871	39070549	9.17408	10.9446	12.8818	CDS	ENSSSCG00000023653
3	39071198	39071411	10.0746	9.09678	6.99266	utr_3	ENSSSCG00000023653
3	39139111	39139372	10.6896	9.57774	11.4328	intergenic	-
3	39140187	39140445	6.7406	5.96965	9.94685	intergenic	-
3	39476827	39477872	6.40527	7.40276	10.0422	CDS	ENSSSCG00000007950
3	39539012	39539288	18.3861	8.84846	13.3383	TSS	ENSSSCG00000007951
3	39564648	39565096	1.48505	2.05023	2.01319	CDS	ENSSSCG00000007951
3	39862647	39862850	3.52544	2.81611	2.66604	Stop	ENSSSCG00000007952
3	39862647	39862850	3.52544	2.81611	2.66604	Stop	ENSSSCG00000007953
3	40173524	40173787	23.6123	17.715	14.858	intergenic	-
3	40174067	40174244	18.0153	10.9813	16.475	CDS	ENSSSCG00000007958
3	40200810	40201416	6.46339	6.17487	7.3168	intergenic	-
3	40294066	40294388	4.68209	8.92607	5.1301	utr_3	ENSSSCG00000007963
3	40295389	40295622	19.9869	35.1921	42.702	CDS	ENSSSCG00000007963
3	40461459	40461639	3.71338	3.39239	4.32687	Stop	ENSSSCG00000007967
3	40461943	40462176	14.9092	11.2325	13.8642	CDS	ENSSSCG00000007967
3	40478627	40478917	20.0892	15.498	12.0697	intergenic	ENSSSCG00000029375
3	40479515	40479877	7.14999	8.15484	7.72655	CDS	ENSSSCG00000029375
3	40535387	40535576	6.43263	5.77479	6.75965	TSS	ENSSSCG00000023315
3	40535387	40535576	6.43263	5.77479	6.75965	TSS	ENSSSCG00000023315
3	40535387	40535576	6.43263	5.77479	6.75965	TSS	ENSSSCG00000027252
3	40613492	40613776	11.0668	9.34452	10.2028	TSS	ENSSSCG00000023304
3	40616824	40617104	6.55205	5.35016	5.10855	CDS	ENSSSCG00000023304
3	40635963	40636162	6.90116	5.76506	6.42672	intron	ENSSSCG00000008061
3	40865198	40865542	18.6642	15.2784	15.7183	intergenic	-
3	40894872	40895341	11.3464	6.20278	6.66703	CDS	ENSSSCG00000007982
3	40895988	40896188	10.1127	8.37002	6.40739	intron	ENSSSCG00000007982
3	40897469	40897644	2.84426	5.08179	3.01997	Stop	ENSSSCG00000007982
3	40960961	40961660	34.147	14.9899	20.5513	utr_3	ENSSSCG00000007979
3	40962615	40963308	6.93151	6.45602	6.0425	Stop	ENSSSCG00000007979
3	40991006	40991219	7.49996	6.44816	4.12502	intergenic	ENSSSCG00000007979
3	41021677	41021917	3.98456	3.75171	4.31213	utr_3	ENSSSCG00000007980
3	41034516	41034721	2.53848	1.93981	3.15273	Stop	ENSSSCG00000023204
3	41041677	41042043	5.21035	4.77315	4.99086	CDS	ENSSSCG00000023204
3	41078947	41079190	3.34203	2.65662	2.88159	CDS	ENSSSCG00000023204
[truncated: 7,297 more rows]

## Sheet: S3 Table. Suckling peaks
Supplementary table 3: m6A peaks in suckling stage
Chr	start	end	peak_Enrichment_suckling 1	peak_Enrichment_suckling2	peak_Enrichment_suckling 3	feature_centerOverlap	OverlapGene
1	256681	257124	5.843	3.83542	3.57012	CDS	ENSSSCG00000029697
1	1069878	1070451	9.11744	4.30033	8.39053	intron	ENSSSCG00000004008
1	1069878	1070451	9.11744	4.30033	8.39053	utr_3	ENSSSCG00000004010
1	2670538	2670712	5.25736	2.59819	7.98656	Stop	ENSSSCG00000004017
1	2671164	2671922	6.50765	3.18878	6.9735	utr_3	ENSSSCG00000004017
1	2721543	2721854	4.83975	3.30246	4.8882	Stop	ENSSSCG00000004018
1	2724416	2724902	3.46477	2.26283	3.6305	CDS	ENSSSCG00000004018
1	2727301	2727628	10.1836	8.48825	16.6472	CDS	ENSSSCG00000004018
1	2734685	2735531	7.30158	4.62624	7.83569	CDS	ENSSSCG00000004018
1	2870293	2870477	9.2957	3.28751	9.12865	intergenic	-
1	2954910	2955253	17.5245	6.46075	17.9862	intergenic	-
1	3307082	3307279	3.35288	2.19263	3.77843	intergenic	-
1	3659580	3659803	6.38755	2.55353	5.05498	utr_3	ENSSSCG00000004022
1	3681278	3681614	10.0437	5.02548	11.4542	intergenic	-
1	3689401	3689726	4.90322	4.83073	8.43713	intergenic	-
1	3741596	3741850	8.62605	3.93635	5.29901	intergenic	ENSSSCG00000004021
1	6386538	6386746	10.5215	3.54739	7.29086	intron	ENSSSCG00000004029
1	8537074	8537483	13.7617	5.97729	13.6176	CDS	ENSSSCG00000004037
1	9420564	9421072	7.56225	4.15127	6.56406	CDS	ENSSSCG00000004050
1	9427652	9428051	4.87522	2.77355	4.38009	intron	ENSSSCG00000004050
1	9447099	9447370	4.48225	3.0544	4.24254	intron	ENSSSCG00000004050
1	9839363	9839563	8.71685	7.69577	9.96472	Stop	ENSSSCG00000004052
1	10050478	10050770	20.8387	13.947	25.2168	CDS	ENSSSCG00000004053
1	10381547	10381739	3.58859	3.70468	5.56395	intergenic	-
1	10382601	10382799	5.84229	2.51593	6.12887	intergenic	-
1	10383564	10383938	10.0365	5.25528	9.56622	intergenic	-
1	10428326	10428580	6.62365	4.23392	10.4557	intron	ENSSSCG00000004058
1	10429134	10429330	4.11238	3.87506	5.19125	CDS	ENSSSCG00000004058
1	10987881	10988011	18.7957	12.2036	40.2655	intergenic	-
1	11252935	11253242	3.44437	2.14058	3.91837	intergenic	-
1	11362319	11362745	5.86767	3.1319	7.34298	intergenic	-
1	11476059	11476820	14.076	8.32049	16.2848	utr_3	ENSSSCG00000024528
1	11656141	11656351	4.32748	3.56504	4.81686	intergenic	-
1	11754790	11754983	8.17204	1.98077	8.50726	Stop	ENSSSCG00000004063
1	11889254	11889575	7.49104	6.47405	8.41916	CDS	ENSSSCG00000004064
1	11889965	11890952	14.2392	8.82263	12.6447	CDS	ENSSSCG00000004064
1	14083797	14084299	15.7364	7.32218	9.2597	CDS	ENSSSCG00000004070
1	14084827	14085003	5.1951	4.67635	7.44299	CDS	ENSSSCG00000004070
1	14166599	14166805	4.94214	2.09205	3.38567	intron	ENSSSCG00000004070
1	14317734	14318269	11.8985	7.57401	11.2075	intergenic	-
1	14450166	14450354	3.82042	1.93356	4.95939	Stop	ENSSSCG00000004071
1	15723195	15723603	6.25582	4.0272	9.57646	CDS	ENSSSCG00000004077
1	15947796	15948006	24.6913	10.0911	14.2692	intergenic	-
1	16507573	16507900	10.1333	4.45698	10.9815	intergenic	-
1	17224492	17224741	7.01276	3.09706	4.96781	CDS	ENSSSCG00000004089
1	17303938	17304391	51.58	15.6206	35.759	Stop	ENSSSCG00000004090
1	17317279	17317487	2.93683	4.18411	3.11023	Stop	ENSSSCG00000004091
1	17317781	17318089	3.77956	7.32218	3.27464	CDS	ENSSSCG00000004091
1	17318666	17319129	4.20465	5.39656	5.24411	CDS	ENSSSCG00000004091
1	17319718	17320018	3.91577	5.75314	3.20941	CDS	ENSSSCG00000004091
1	17321002	17321223	4.80514	8.24752	6.60926	CDS	ENSSSCG00000004091
1	17321649	17321832	2.52823	6.75165	2.93889	CDS	ENSSSCG00000004091
1	18625879	18626166	9.39786	4.37429	8.01244	utr_5	ENSSSCG00000004106
1	18853903	18854059	3.6155	2.15743	3.36675	utr_3	ENSSSCG00000004110
1	18878082	18878283	5.41044	1.28574	4.25025	CDS	ENSSSCG00000004110
1	18879091	18879263	7.57772	2.83528	5.64326	CDS	ENSSSCG00000004110
1	18930014	18930452	11.7628	5.27768	21.4855	intergenic	-
1	19580773	19581040	3.91397	2.26639	4.18111	intergenic	-
1	20431189	20431387	46.172	13.0753	24.6067	intergenic	-
1	20706116	20706395	22.7909	8.04636	39.452	utr_5	ENSSSCG00000004113
1	21320175	21320311	4.26629	2.53508	3.59793	Stop	ENSSSCG00000004117
1	21341697	21342044	6.28027	3.77995	6.54537	utr_5	ENSSSCG00000004117
1	22009707	22010062	8.09777	4.32675	12.6084	CDS	ENSSSCG00000004121
1	23480486	23480825	11.6073	5.03488	10.7706	Stop	ENSSSCG00000004125
1	23855745	23855907	4.05333	3.3545	2.96094	CDS	ENSSSCG00000004132
1	24149244	24149432	2.52268	1.3863	2.296	utr_3	ENSSSCG00000004133
1	24927789	24928140	35.0376	26.7139	52.652	CDS	ENSSSCG00000004138
1	24934404	24934628	19.7297	4.70712	25.3524	CDS	ENSSSCG00000004138
1	25360351	25360571	15.7721	4.14052	17.4891	CDS	ENSSSCG00000004139
1	28295944	28296121	5.30573	4.1059	3.55388	CDS	ENSSSCG00000004142
1	28296262	28296653	8.8936	5.64139	8.00699	Stop	ENSSSCG00000004142
1	28455036	28455260	6.45161	3.27888	5.30192	intergenic	-
1	28530117	28530973	7.82996	5.12174	5.62795	CDS	ENSSSCG00000004144
1	28641712	28642069	7.15674	2.90925	6.13472	intergenic	ENSSSCG00000004146
1	29115175	29115483	19.8853	11.6736	29.8406	CDS	ENSSSCG00000004149
1	29116387	29116726	3.31989	3.86786	4.44265	CDS	ENSSSCG00000004149
1	29117568	29117768	4.83787	4.03983	2.87098	CDS	ENSSSCG00000004149
1	29123921	29124509	8.67794	4.74133	6.71363	CDS	ENSSSCG00000004149
1	29126178	29126377	24.1893	5.82786	13.7382	utr_3	ENSSSCG00000004149
1	29826764	29826964	8.8871	4.55769	18.5058	utr_3	ENSSSCG00000004154
1	29827199	29827729	16.4507	9.72418	12.5758	utr_3	ENSSSCG00000004154
1	29829651	29829917	17.4455	6.98224	11.1423	CDS	ENSSSCG00000004154
1	30408367	30408756	6.49904	3.08037	5.51824	CDS	ENSSSCG00000004156
1	30408918	30409225	10.2295	5.15322	10.1491	intergenic	-
1	31299082	31299272	10.2151	3.89354	11.2005	intergenic	-
1	31432556	31432816	17.1068	10.2642	15.6469	Stop	ENSSSCG00000004165
1	31432991	31433196	16.9385	15.4289	13.8286	utr_3	ENSSSCG00000004165
1	32580112	32580403	5.82257	10.6695	15.7808	intergenic	-
1	32588619	32588841	7.93856	3.68862	9.67998	intergenic	-
1	32593383	32593583	8.27957	4.79729	5.9493	intergenic	-
1	32594932	32595313	7.63426	5.44598	6.70709	nc_exon	ENSSSCG00000004170
1	33255458	33255799	10.8367	5.35256	8.89663	utr_3	ENSSSCG00000021443
1	34537527	34537718	7.324	2.99916	5.71471	CDS	ENSSSCG00000004181
1	34543267	34543463	5.49439	1.86863	3.68761	Stop	ENSSSCG00000004181
1	35134714	35134944	4.14888	1.74338	4.18343	Stop	ENSSSCG00000004192
1	35136857	35137091	2.86738	1.22348	3.04341	TSS	ENSSSCG00000004192
1	35243987	35244283	11.4285	8.39048	10.5494	Stop	ENSSSCG00000004193
1	35594633	35594845	7.6175	4.75259	7.32099	intergenic	-
1	35997373	35997723	6.12443	3.86983	6.44064	CDS	ENSSSCG00000004199
1	36035102	36035302	5.38894	4.08147	4.72022	intergenic	ENSSSCG00000004200
1	37360493	37360714	5.86635	1.70464	7.2559	intron	ENSSSCG00000004206
1	37360493	37360714	5.86635	1.70464	7.2559	intron	ENSSSCG00000004207
1	37360493	37360714	5.86635	1.70464	7.2559	utr_3	ENSSSCG00000004206
1	39594739	39595463	12.5095	8.04757	9.39301	CDS	ENSSSCG00000004217
1	39663526	39663797	36.6108	10.4127	30.9922	intron	ENSSSCG00000004218
1	45545599	45545893	16.627	7.98466	11.666	Stop	ENSSSCG00000004241
1	47894265	47895570	4.91255	3.91858	4.7631	utr_5	ENSSSCG00000004244
1	48679036	48679272	7.32929	2.2724	5.58318	intron	ENSSSCG00000004248
1	48679036	48679272	7.32929	2.2724	5.58318	intron	ENSSSCG00000004249
1	48679036	48679272	7.32929	2.2724	5.58318	Stop	ENSSSCG00000004248
1	49532516	49532754	13.0753	3.11346	9.35463	utr_5	ENSSSCG00000020885
1	49584196	49584493	7.61486	4.52336	24.505	TSS	ENSSSCG00000004253
1	49627446	49627674	6.22632	3.09053	6.20249	Stop	ENSSSCG00000004253
1	49647392	49647602	3.65884	2.21616	3.57012	Stop	ENSSSCG00000004254
1	57650964	57651307	3.57776	1.93416	3.72212	CDS	ENSSSCG00000004279
1	57663294	57663580	7.1003	3.63558	5.85916	CDS	ENSSSCG00000004279
1	57663935	57664166	18.8411	9.6467	14.0726	intergenic	-
1	57767387	57767652	2.1424	1.07482	2.04672	intergenic	-
1	59272841	59273066	3.64239	2.27064	3.7261	CDS	ENSSSCG00000004281
1	59273366	59273600	19.3245	11.6413	11.787	CDS	ENSSSCG00000004281
1	59274437	59274722	4.11078	2.96374	4.80193	utr_3	ENSSSCG00000004281
1	59275320	59275563	4.04302	2.20216	4.29424	utr_3	ENSSSCG00000004281
1	60997917	60998131	3.70528	1.66624	3.22696	intergenic	-
1	61000169	61000382	2.84419	1.95258	3.00053	CDS	ENSSSCG00000004294
1	62403548	62403853	36.8831	13.2496	43.0448	Stop	ENSSSCG00000025140
1	62812778	62813115	3.3876	1.55649	3.86153	utr_5	ENSSSCG00000004307
1	63822327	63822490	6.7828	2.46563	10.5748	intergenic	-
1	63871868	63872080	3.89837	2.01679	3.67194	Stop	ENSSSCG00000026249
1	64142105	64142333	4.33272	3.21389	2.63874	TSS	ENSSSCG00000004317
1	64551785	64551984	5.81123	4.35372	8.36685	intergenic	-
1	71041611	71041888	6.74194	3.75339	6.15166	CDS	ENSSSCG00000004337
1	71079857	71080151	6.11127	2.539	4.33002	Stop	ENSSSCG00000004337
1	74469047	74469324	6.58571	2.63518	4.67729	CDS	ENSSSCG00000004347
1	80313073	80313282	12.0066	5.43934	9.47078	CDS	ENSSSCG00000004364
1	80817270	80817470	4.26479	1.77184	3.88188	Stop	ENSSSCG00000004368
1	82004855	82005077	12.1218	5.27561	14.3071	Stop	ENSSSCG00000004371
1	82059750	82059986	16.8602	6.47733	16.483	utr_3	ENSSSCG00000004371
1	82526329	82526587	8.52228	7.44525	6.86909	intergenic	-
1	83348945	83349347	9.9699	4.02477	12.2615	utr_5	ENSSSCG00000004382
1	83451515	83451737	2.41756	1.96795	1.97779	CDS	ENSSSCG00000004383
1	83887919	83888695	8.36547	4.5139	6.11886	CDS	ENSSSCG00000004387
1	84048500	84048904	3.99416	3.36063	4.38593	Stop	ENSSSCG00000004387
1	84065862	84066283	6.23852	4.0795	5.5629	intergenic	-
1	84789265	84789449	4.99403	1.95561	4.28128	Stop	ENSSSCG00000004408
1	86046856	86047111	30.4409	15.8996	24.7648	CDS	ENSSSCG00000004399
1	86106287	86106511	24.6523	7.07606	12.0564	intergenic	-
1	86423345	86423539	5.92474	3.10201	4.4197	TSS	ENSSSCG00000004392
1	86469901	86470101	14.9821	4.68221	18.4042	intergenic	-
1	86714814	86715111	9.68972	3.09934	7.52436	intergenic	ENSSSCG00000004417
1	87146513	87146791	9.09822	2.19933	6.85616	Stop	ENSSSCG00000004421
1	87423665	87423937	4.01647	2.70357	4.32143	intergenic	-
1	89853806	89854045	3.30614	2.05742	3.35929	Stop	ENSSSCG00000023610
1	89854246	89854636	7.57714	4.45907	8.41038	utr_3	ENSSSCG00000023610
1	92023001	92023982	7.68387	4.86557	6.6945	intergenic	ENSSSCG00000004438
1	92024284	92025116	5.35129	4.80306	6.12443	CDS	ENSSSCG00000004438
1	92247085	92247298	7.46835	5.49162	8.0605	CDS	ENSSSCG00000004441
1	92247844	92248069	6.14009	4.29308	9.32333	CDS	ENSSSCG00000004441
1	92248325	92248577	12.21	7.06068	11.6142	CDS	ENSSSCG00000004441
1	92967420	92967665	10.3226	5.94583	6.10083	Stop	ENSSSCG00000004452
1	92967853	92968704	7.88885	7.9474	6.52319	CDS	ENSSSCG00000004452
1	95104472	95104722	5.48695	9.25331	5.01815	intron	ENSSSCG00000004464
1	95104942	95105544	8.59724	8.91378	5.5297	CDS	ENSSSCG00000004464
1	95106665	95107271	13.3375	9.76881	10.1446	CDS	ENSSSCG00000004464
1	96716336	96716564	5.85895	2.63948	6.22781	TSS	ENSSSCG00000004465
1	97114662	97114964	7.13559	3.53213	6.48818	intergenic	-
1	97116271	97116481	5.82258	2.17051	4.83086	intergenic	-
1	101174429	101174647	5.13818	2.64993	5.88887	Stop	ENSSSCG00000020702
1	101299781	101300206	3.90634	2.29972	5.66	intergenic	-
1	101833121	101833477	12.4374	5.30998	13.8285	intron	ENSSSCG00000004484
1	106025739	106025946	10.4194	6.53766	7.55341	CDS	ENSSSCG00000004500
1	106026217	106026417	12.0829	5.0807	12.4728	CDS	ENSSSCG00000004500
1	108027066	108027273	12.2581	4.04147	9.30374	Stop	ENSSSCG00000004506
1	108089204	108089562	4.16776	2.51383	3.182	CDS	ENSSSCG00000004507
1	108116816	108117543	9.14442	4.5495	7.52436	CDS	ENSSSCG00000004507
1	109591096	109591342	7.70507	5.23013	7.95649	utr_3	ENSSSCG00000004516
1	109627226	109627436	4.12233	3.13808	5.77346	CDS	ENSSSCG00000004517
1	110466190	110466393	21.1111	7.21758	18.2008	Stop	ENSSSCG00000024479
1	110509236	110509481	5.3421	2.64413	5.23107	utr_5	ENSSSCG00000004524
1	110613972	110614229	5.32231	2.85042	6.23642	CDS	ENSSSCG00000004525
1	114063358	114063768	10.3017	4.46029	10.8638	TSS	ENSSSCG00000004528
1	117246333	117246776	22.6856	8.33745	21.2309	nc_exon	ENSSSCG00000030235
1	117246333	117246776	22.6856	8.33745	21.2309	TSS	ENSSSCG00000004540
1	117595892	117596101	12.1413	3.90517	5.05497	intergenic	-
1	118018279	118018501	5.44803	3.27218	3.80576	CDS	ENSSSCG00000004547
1	118018736	118019028	21.3494	8.12813	17.9466	CDS	ENSSSCG00000004547
1	118169045	118169165	3.77171	2.55128	3.42324	Stop	ENSSSCG00000004550
1	118181306	118181494	8.06992	5.23013	10.2619	CDS	ENSSSCG00000004551
1	118182512	118182711	8.17204	6.10182	9.47078	CDS	ENSSSCG00000004551
1	118378105	118378614	7.17607	4.45699	5.76191	CDS	ENSSSCG00000004551
1	120002190	120002396	5.3911	2.79365	4.7661	Stop	ENSSSCG00000026571
1	120133554	120134067	5.08952	3.06896	4.76131	Stop	ENSSSCG00000004569
1	120145069	120145268	5.41599	2.32028	3.99438	CDS	ENSSSCG00000004569
1	120234529	120234762	2.90008	2.84203	3.685	intron	ENSSSCG00000004570
1	120239953	120240126	2.04301	3.12449	2.02495	TSS	ENSSSCG00000004570
1	121351364	121351772	3.66985	2.89401	3.99327	Stop	ENSSSCG00000004573
1	121352091	121352344	3.23738	2.29809	3.56921	CDS	ENSSSCG00000004573
1	123238548	123238960	6.60605	2.73781	6.39965	utr_3	ENSSSCG00000004576
1	123618330	123618569	83.2186	64.3306	78.904	intergenic	-
1	124906901	124907132	4.55913	2.79883	4.66081	intergenic	-
1	125013309	125013505	19.7763	3.5404	15.9977	CDS	ENSSSCG00000004589
1	125475814	125476099	7.10515	3.57596	5.29605	Stop	ENSSSCG00000004595
1	126391044	126391204	1.22581	1.88795	2.04523	CDS	ENSSSCG00000030605
1	126391365	126391662	17.0171	5.36511	11.2773	CDS	ENSSSCG00000030605
1	126547477	126547916	4.80107	4.38118	6.65888	intergenic	-
1	126845709	126845925	4.27054	2.3398	4.52699	nc_exon	ENSSSCG00000004600
1	128807784	128808166	16.0716	5.63245	13.6408	intergenic	-
1	129025055	129025501	17.2626	8.34919	19.7449	CDS	ENSSSCG00000004610
1	129025055	129025501	17.2626	8.34919	19.7449	utr_3	ENSSSCG00000024046
1	131981755	131982185	8.60467	5.52479	7.42842	utr_5	ENSSSCG00000004616
1	131982456	131982636	1.74099	2.03551	2.09565	CDS	ENSSSCG00000004616
1	132018554	132019089	14.9939	5.23013	14.4034	intergenic	ENSSSCG00000004616
1	132089282	132090146	13.0577	6.84843	13.4718	intergenic	-
1	135128977	135129191	24.1075	7.22709	13.8286	Stop	ENSSSCG00000004645
1	135221426	135221631	2.02247	1.60368	1.67284	CDS	ENSSSCG00000004643
1	136150601	136150840	4.0661	2.33114	4.08707	Stop	ENSSSCG00000004651
1	136509289	136509830	8.69622	4.75571	6.58742	CDS	ENSSSCG00000004653
1	136635479	136635679	17.3764	5.43129	23.6408	intron	ENSSSCG00000004655
1	136636116	136636314	11.7327	6.48536	4.72423	intron	ENSSSCG00000004655
1	136636721	136636946	4.13271	3.80637	4.56322	CDS	ENSSSCG00000004656
1	136636721	136636946	4.13271	3.80637	4.56322	intron	ENSSSCG00000004655
1	137389044	137389290	4.74757	1.51843	3.60241	intergenic	-
1	138044958	138045159	14.6075	11.8985	11.8627	CDS	ENSSSCG00000004663
1	140861141	140861417	3.32153	2.84446	4.39001	intron	ENSSSCG00000004672
1	141257240	141257461	8.76636	3.50419	5.53769	utr_3	ENSSSCG00000004679
1	141310946	141311156	14.6353	3.9226	13.9025	intergenic	-
1	141742452	141742681	12.9571	5.87556	11.1116	intron	ENSSSCG00000004691
1	141742452	141742681	12.9571	5.87556	11.1116	intron	ENSSSCG00000004691
1	141742452	141742681	12.9571	5.87556	11.1116	intron	ENSSSCG00000023996
1	141757219	141757421	10.542	2.95129	10.3607	intron	ENSSSCG00000004690
1	141757219	141757421	10.542	2.95129	10.3607	intron	ENSSSCG00000023996
1	142585107	142585423	8.17204	3.80638	7.06069	intergenic	-
1	142589073	142589396	4.04123	2.60707	4.28956	TSS	ENSSSCG00000004697
1	142982745	142982957	5.82939	3.90248	4.74509	CDS	ENSSSCG00000004711
1	143823193	143823396	5.58423	2.80186	5.66399	CDS	ENSSSCG00000004725
1	143982231	143982532	24.0174	14.0321	22.349	intron	ENSSSCG00000004729
1	143989743	143989921	3.85253	6.34153	3.93878	intergenic	ENSSSCG00000004729
1	144360893	144361111	6.75082	6.37738	22.9571	TSS	ENSSSCG00000004735
1	144486120	144486655	15.7993	8.23746	15.8482	utr_3	ENSSSCG00000027182
1	144622370	144622589	5.74597	4.64901	5.43989	utr_3	ENSSSCG00000020666
1	144624730	144625056	26.5467	9.71596	21.9838	Stop	ENSSSCG00000020666
1	144947182	144947465	5.18925	2.12032	6.364	CDS	ENSSSCG00000004746
1	144960260	144960809	5.10915	3.40445	6.53195	utr_3	ENSSSCG00000004747
1	145010250	145010496	11.7293	6.1212	11.1904	TSS	ENSSSCG00000004747
1	145539827	145540077	30.1003	6.72446	21.7461	Stop	ENSSSCG00000004755
1	145541367	145541577	8.89311	6.32164	9.23496	CDS	ENSSSCG00000004755
1	145571059	145571605	6.93548	4.90395	6.86344	Stop	ENSSSCG00000004757
1	145573976	145574566	7.42748	5.17255	8.46393	CDS	ENSSSCG00000004757
1	145574836	145575202	4.71642	2.92224	2.86212	CDS	ENSSSCG00000004757
1	145714755	145714967	4.75	4.22958	5.74495	CDS	ENSSSCG00000004763
1	145714755	145714967	4.75	4.22958	5.74495	intron	ENSSSCG00000004760
1	145714755	145714967	4.75	4.22958	5.74495	intron	ENSSSCG00000004762
1	145809511	145809711	5.9433	4.86402	5.18571	intron	ENSSSCG00000004760
1	145930806	145931049	11.4409	12.8512	6.64903	intergenic	-
1	145931264	145931486	12.3035	6.93863	9.93078	CDS	ENSSSCG00000004771
1	145931679	145932018	21.8759	9.65563	24.9949	CDS	ENSSSCG00000004771
1	145932205	145932401	4.31953	3.66109	3.45097	intergenic	-
1	145935689	145935944	4.05967	2.27801	5.20603	utr_3	ENSSSCG00000004772
1	145943159	145943731	6.98338	4.40825	8.21746	CDS	ENSSSCG00000004772
1	145958535	145958741	6.26524	4.18411	6.82243	intergenic	-
1	146002848	146003043	4.59191	2.71967	4.96201	intergenic	ENSSSCG00000004775
1	146126731	146127860	20.788	12.1433	21.2159	intergenic	-
1	146211862	146212038	2.97696	3.37053	3.74184	intergenic	-
1	146212920	146213123	11.5152	3.87645	7.37522	intergenic	-
1	146286649	146286876	16.8207	8.74179	43.2753	utr_3	ENSSSCG00000004779
1	146907552	146908009	12.8361	5.67471	9.49018	utr_3	ENSSSCG00000004789
1	148443040	148443293	14.6031	8.94354	21.5776	CDS	ENSSSCG00000004793
1	148550474	148550711	8.9047	4.05335	8.3485	intergenic	-
1	152625654	152625858	6.77112	5.53779	6.34486	intergenic	-
1	152644677	152645027	16.8548	4.02318	15.9074	CDS	ENSSSCG00000004806
1	152645584	152645815	17.5245	9.86253	15.6181	CDS	ENSSSCG00000004806
1	153854110	153854491	8.95782	5.00129	9.26745	intergenic	-
1	154042890	154043149	16.9979	13.0753	13.2863	CDS	ENSSSCG00000029613
1	154775326	154775559	7.08244	5.23013	6.94139	CDS	ENSSSCG00000030487
1	155373374	155373574	5.72041	3.26883	5.53142	CDS	ENSSSCG00000004820
1	155426652	155426952	24.6387	11.0704	26.0302	CDS	ENSSSCG00000004821
1	155961210	155961422	19.8853	11.7155	29.4873	Stop	ENSSSCG00000004825
1	155962227	155962398	4.90323	5.43934	4.65882	CDS	ENSSSCG00000004825
1	156033848	156034291	21.5651	10.6237	10.1274	intergenic	-
1	157765643	157765875	6.30744	3.37052	7.2177	nc_exon	ENSSSCG00000004831
1	157783837	157784106	6.08363	2.92314	7.5752	utr_5	ENSSSCG00000004832
1	157856170	157856914	5.13576	3.24268	5.53141	CDS	ENSSSCG00000004832
1	157897411	157897633	15.3634	6.53766	11.4899	intergenic	-
1	158276722	158276950	2.41447	2.44073	3.99097	nc_exon	ENSSSCG00000004834
1	159399450	159399658	7.35484	3.69186	5.91019	utr_3	ENSSSCG00000026006
1	159399998	159400843	4.9922	2.93178	4.2141	utr_3	ENSSSCG00000026006
1	159450414	159450632	3.22342	1.67364	3.57915	intron	ENSSSCG00000026006
1	159484716	159485228	4.18453	3.26506	3.9347	CDS	ENSSSCG00000026006
1	159860277	159860737	7.69534	4.09112	6.80759	CDS	ENSSSCG00000004844
1	159935585	159935828	4.6556	3.27755	5.04338	CDS	ENSSSCG00000004847
1	159967695	159967964	6.37184	3.16796	5.29627	Stop	ENSSSCG00000004846
1	160546750	160547033	4.13711	3.61627	4.21248	TSS	ENSSSCG00000004852
1	163944345	163944761	12.0401	7.47162	9.8388	CDS	ENSSSCG00000004859
1	163944930	163945256	7.05039	6.15547	7.60199	CDS	ENSSSCG00000004859
1	164773997	164774400	8.70635	4.45075	7.67986	intergenic	-
1	164775954	164776386	15.5759	7.63172	18.1617	intergenic	-
1	164783272	164783468	4.13956	3.39857	4.07072	nc_exon	ENSSSCG00000004862
1	164783669	164783921	4.33049	2.71016	3.9027	nc_exon	ENSSSCG00000004862
1	164833081	164833572	9.58102	4.77249	6.31304	CDS	ENSSSCG00000004861
1	164834603	164834814	2.91859	3.91291	4.70635	CDS	ENSSSCG00000004861
1	164835463	164836054	7.84516	5.76032	9.15124	Stop	ENSSSCG00000004861
1	165071163	165071542	10.1987	5.42284	10.8705	nc_exon	ENSSSCG00000004863
1	165071830	165072459	12.4215	6.81928	15.2364	nc_exon	ENSSSCG00000004863
1	165529568	165529854	3.69362	2.67588	4.2567	intron	ENSSSCG00000004870
1	168992089	168993268	18.58	12.2617	13.8911	CDS	ENSSSCG00000004878
1	173662673	173662922	29.2832	13.5983	44.5361	Stop	ENSSSCG00000004886
1	175812360	175812534	3.42699	1.28742	3.43971	Stop	ENSSSCG00000025744
1	176120386	176120799	5.63662	3.7192	8.03277	Stop	ENSSSCG00000004896
1	176409480	176409876	18.966	7.97099	25.029	CDS	ENSSSCG00000004897
1	176515164	176515420	7.71235	4.83165	6.31982	nc_exon	ENSSSCG00000021838
1	176595698	176595995	29.4904	12.0044	22.7518	Stop	ENSSSCG00000004898
1	176608603	176608958	31.246	12.8034	32.4421	CDS	ENSSSCG00000004898
1	176780801	176781013	5.66206	2.72876	3.99327	CDS	ENSSSCG00000004899
1	177064224	177064475	13.7835	6.13188	24.9844	intergenic	-
1	177064931	177065169	8.17204	4.18411	7.759	TSS	ENSSSCG00000004902
1	179129562	179129803	8.73386	4.32358	9.06412	Stop	ENSSSCG00000004907
1	179453710	179453928	11.4889	7.56358	31.9568	Stop	ENSSSCG00000004915
1	179909698	179909911	2.93526	3.06336	2.79073	intergenic	-
1	180550941	180551158	10.3902	4.96863	12.5812	intergenic	-
1	180682133	180682327	7.7362	2.91786	9.6988	Stop	ENSSSCG00000004926
1	180693756	180693962	7.17326	4.14052	5.78799	CDS	ENSSSCG00000004926
1	180699751	180699983	3.582	1.84798	2.94326	Stop	ENSSSCG00000004927
1	181022340	181022543	8.00857	2.51046	6.364	utr_3	ENSSSCG00000004934
1	181024992	181025167	10.3226	4.01894	11.334	Stop	ENSSSCG00000004934
1	181142813	181143324	18.5114	10.4148	15.4554	utr_3	ENSSSCG00000004936
1	182138436	182138648	3.38557	1.91227	3.4468	intergenic	-
1	182399479	182401108	16.7143	11.2702	14.707	intergenic	ENSSSCG00000004948
1	182685440	182685636	9.19355	6.87389	6.06954	intergenic	-
1	182899025	182899223	5.04744	1.79917	5.65537	utr_3	ENSSSCG00000004952
1	182901391	182901600	18.4325	4.7507	9.08345	utr_3	ENSSSCG00000004952
1	182902627	182903215	10.7075	6.36456	8.71799	utr_3	ENSSSCG00000004952
1	183918911	183919570	2.87031	3.11972	3.51679	intron	ENSSSCG00000004958
1	183918911	183919570	2.87031	3.11972	3.51679	intron	ENSSSCG00000022419
1	183928165	183929113	7.04146	5.35319	4.8292	CDS	ENSSSCG00000022419
1	183928165	183929113	7.04146	5.35319	4.8292	intron	ENSSSCG00000004958
1	183929417	183929912	12.8029	6.93732	14.3523	intron	ENSSSCG00000004958
1	183929417	183929912	12.8029	6.93732	14.3523	Stop	ENSSSCG00000022419
1	183948646	183948883	8.96831	4.35146	10.311	utr_3	ENSSSCG00000004958
1	184629834	184630495	18.6141	7.13444	23.0814	intergenic	-
1	185076945	185077081	4.47312	3.44317	3.93165	CDS	ENSSSCG00000026078
1	185088289	185089178	12.6613	7.58369	10.2852	CDS	ENSSSCG00000026078
1	186647443	186647632	8.30824	4.55021	4.47394	CDS	ENSSSCG00000004973
1	187975760	187976103	47.0264	46.0252	34.4358	intron	ENSSSCG00000004980
1	187975760	187976103	47.0264	46.0252	34.4358	Stop	ENSSSCG00000020940
1	188404924	188405143	2.52524	1.98437	3.38055	CDS	ENSSSCG00000022828
1	188627023	188627264	4.99663	2.5617	4.50785	CDS	ENSSSCG00000004989
1	194967642	194967891	23.3846	6.4581	77.4805	Stop	ENSSSCG00000004996
1	194971802	194971980	12.0351	6.40691	12.1277	CDS	ENSSSCG00000004996
1	194977511	194977696	7.69534	4.33354	10.7966	CDS	ENSSSCG00000004996
1	196941192	196941392	64.9679	61.7156	139.912	Stop	ENSSSCG00000005002
1	199864368	199864774	6.4177	5.20469	6.38045	TSS	ENSSSCG00000005006
1	199864954	199865180	4.00177	3.40277	4.01351	CDS	ENSSSCG00000005006
1	199865552	199866152	14.9551	7.73267	13.2418	CDS	ENSSSCG00000005006
1	199875918	199876165	6.47477	4.44561	7.18542	CDS	ENSSSCG00000005007
1	199876881	199877564	8.78829	6.27615	10.6061	TSS	ENSSSCG00000005007
1	199959110	199959316	18.4946	6.97351	19.0517	intergenic	-
1	200073909	200075135	9.739	6.24445	8.64789	TSS	ENSSSCG00000005012
1	200174963	200175165	28.3978	7.8452	16.6175	intergenic	-
1	200356060	200356287	4.23023	1.79319	6.2683	intergenic	-
1	200724465	200724803	14.7097	5.57881	14.1771	intergenic	-
1	201695348	201695800	8.70746	6.12672	6.42622	Stop	ENSSSCG00000005027
1	201696057	201696336	13.0311	12.143	18.9997	utr_3	ENSSSCG00000005027
1	202028552	202028788	4.57634	3.41096	4.77898	CDS	ENSSSCG00000005030
1	202405415	202405599	89.3478	46.7225	66.2958	intron	ENSSSCG00000027537
1	202405415	202405599	89.3478	46.7225	66.2958	utr_3	ENSSSCG00000029703
1	202588654	202589013	10.0516	6.96008	9.3967	intergenic	ENSSSCG00000005037
1	203017962	203018166	5.53184	3.32827	3.88235	CDS	ENSSSCG00000005043
1	203774335	203774602	10.7871	8.92199	7.53509	CDS	ENSSSCG00000005045
1	204900381	204900551	16.3441	5.0692	14.7582	CDS	ENSSSCG00000005053
1	204917942	204918125	3.17153	1.41961	3.21051	CDS	ENSSSCG00000005054
1	205237794	205238018	13.8494	10.53	16.0429	nc_exon	ENSSSCG00000005057
1	205238692	205239180	9.10365	5.2656	8.07419	intergenic	ENSSSCG00000005057
1	206216375	206216591	120.947	21.6179	58.9747	Stop	ENSSSCG00000021134
1	206501611	206501882	8.98923	5.77407	9.93563	Stop	ENSSSCG00000005062
1	206908393	206908598	23.8079	8.15902	15.7979	intergenic	-
1	207011020	207011192	16.5256	9.28348	10.4121	CDS	ENSSSCG00000005065
1	207103203	207103820	6.00201	4.17663	5.5277	CDS	ENSSSCG00000005064
1	210243377	210243587	13.4255	7.06068	12.3824	TSS	ENSSSCG00000005082
1	210373684	210374032	3.12815	3.11581	4.54926	intergenic	-
1	210390805	210391231	5.43648	2.48709	4.08417	CDS	ENSSSCG00000005084
1	211525881	211526165	5.54838	4.00306	5.02593	intergenic	-
1	211527306	211527509	3.81361	2.04965	3.80198	intergenic	-
1	211586988	211587290	10.7871	4.74737	11.0628	utr_5	ENSSSCG00000030657
1	211816883	211817201	21.0273	6.51898	27.4944	utr_3	ENSSSCG00000005095
1	212763958	212764206	7.80198	2.53248	4.58486	Stop	ENSSSCG00000005105
1	216298482	216298739	3.23168	2.40072	3.60679	utr_5	ENSSSCG00000028558
1	216328872	216329096	17.3656	11.7155	16.5129	intron	ENSSSCG00000028558
1	216418881	216419086	5.59785	2.7894	4.72814	intergenic	-
1	216419765	216420011	4.9359	2.025	4.58097	intergenic	-
1	216446591	216446956	15.1051	6.24865	11.6237	CDS	ENSSSCG00000005112
1	216447423	216447623	6.37418	4.11873	7.47352	TSS	ENSSSCG00000005112
1	216796811	216797007	5.66771	2.34775	4.78823	Stop	ENSSSCG00000022804
1	218224850	218225064	6.22951	2.62185	6.10084	Stop	ENSSSCG00000005122
1	218678118	218678321	3.52565	2.45589	5.15181	TSS	ENSSSCG00000005127
1	218721132	218721320	7.82796	6.32597	9.10041	Stop	ENSSSCG00000005127
1	219726452	219726847	3.15207	2.90272	4.88066	CDS	ENSSSCG00000005128
1	224076832	224077033	4.11078	1.71168	4.7757	Stop	ENSSSCG00000005135
1	224616516	224616772	27.4582	8.52914	21.1496	intron	ENSSSCG00000022426
1	224616516	224616772	27.4582	8.52914	21.1496	intron	ENSSSCG00000022426
1	224616516	224616772	27.4582	8.52914	21.1496	intron	ENSSSCG00000029085
1	224957322	224958046	13.5061	7.9751	12.951	CDS	ENSSSCG00000005150
1	224957322	224958046	13.5061	7.9751	12.951	intron	ENSSSCG00000005150
1	224957322	224958046	13.5061	7.9751	12.951	intron	ENSSSCG00000028884
1	224958362	224958976	11.6513	7.25054	9.25056	CDS	ENSSSCG00000005150
1	224958362	224958976	11.6513	7.25054	9.25056	intron	ENSSSCG00000005150
1	224958362	224958976	11.6513	7.25054	9.25056	intron	ENSSSCG00000028884
1	227420648	227420880	3.78495	2.28155	3.99096	CDS	ENSSSCG00000005174
1	232191262	232191519	4.42416	2.25721	7.15833	intergenic	ENSSSCG00000005190
1	233480727	233481071	20.2549	11.0055	21.6568	intergenic	-
1	233603438	233603883	5.01024	2.54265	4.21663	intergenic	-
1	239146256	239146509	16.242	5.96235	13.163	intergenic	-
1	241128671	241129099	5.68151	3.09338	8.51858	CDS	ENSSSCG00000023898
1	241783938	241784182	9.85452	6.04371	12.1277	CDS	ENSSSCG00000005204
1	241784393	241784945	7.06541	5.02984	8.66207	CDS	ENSSSCG00000005204
1	241785104	241785884	10.5435	8.32462	10.3447	CDS	ENSSSCG00000005204
1	241842271	241842518	12.7121	7.32218	19.2176	TSS	ENSSSCG00000005205
1	241949140	241949350	15.9355	4.60252	12.9609	utr_5	ENSSSCG00000005205
1	241950645	241950860	7.99693	2.77197	9.30374	CDS	ENSSSCG00000005205
1	241951406	241951572	5.81123	1.70667	3.44517	CDS	ENSSSCG00000005205
1	242045603	242045899	16.5844	5.18257	17.5775	CDS	ENSSSCG00000005207
1	242117338	242117669	20.0587	6.08002	10.8379	Stop	ENSSSCG00000005208
1	242681910	242682153	18.1271	4.73202	11.8458	intergenic	-
1	242837325	242837501	2.82616	3.06336	3.79607	intergenic	-
1	242978743	242979226	4.16568	2.39678	4.0975	utr_3	ENSSSCG00000005217
1	242999114	242999300	3.99522	1.56904	3.75234	intron	ENSSSCG00000005217
1	243189776	243190598	4.78648	2.7894	4.36036	CDS	ENSSSCG00000005220
1	247301922	247302163	2.39713	2.59093	2.57978	CDS	ENSSSCG00000005235
1	248523603	248523925	12.4744	5.16193	13.4457	intergenic	ENSSSCG00000005245
1	248524463	248524765	9.12544	4.04713	7.0973	TSS	ENSSSCG00000005245
1	248825765	248826025	4.38566	2.51612	5.69412	intron	ENSSSCG00000005247
1	248825765	248826025	4.38566	2.51612	5.69412	Stop	ENSSSCG00000005247
1	248825765	248826025	4.38566	2.51612	5.69412	Stop	ENSSSCG00000029150
1	248848348	248848672	5.05971	2.81296	5.69411	CDS	ENSSSCG00000005247
1	248882991	248883166	2.19011	2.40586	1.26802	Stop	ENSSSCG00000005247
1	249498716	249498990	15.2	9.62344	18.7948	Stop	ENSSSCG00000005252
1	250030099	250030985	4.29565	3.17221	3.76834	utr_5	ENSSSCG00000021646
1	250053996	250054276	4.98119	2.82679	4.74245	Stop	ENSSSCG00000021646
1	251551753	251551970	14.3251	7.62984	12.4051	CDS	ENSSSCG00000005260
1	251726251	251726494	7.76343	4.41292	6.91428	CDS	ENSSSCG00000021802
1	251758858	251759146	3.78704	2.11408	5.20605	TSS	ENSSSCG00000021802
1	252240717	252240911	10.7871	3.28751	10.9815	intergenic	-
1	254943830	254944371	3.5023	1.83295	3.42857	TSS	ENSSSCG00000025640
1	254991139	254991396	7.61636	3.82453	12.5869	CDS	ENSSSCG00000005271
1	255039829	255040044	3.88172	1.47674	4.86473	intergenic	-
1	256220287	256220491	34.7312	7.89274	16.8499	CDS	ENSSSCG00000005277
1	257571819	257572070	3.84767	2.60892	2.76571	intergenic	-
1	261897907	261898896	4.73228	3.29258	4.72431	intergenic	-
1	263424105	263424312	14.3692	2.5279	6.54143	CDS	ENSSSCG00000005301
1	264046498	264046755	3.96344	3.00733	6.94139	CDS	ENSSSCG00000005308
1	264066225	264066467	2.64166	2.39092	2.897	intergenic	-
1	264070521	264070929	4.22661	2.4715	4.52124	Stop	ENSSSCG00000005310
1	264109084	264109454	3.84685	3.48675	4.37225	intergenic	-
1	264134530	264134725	3.94074	2.82246	2.45313	TSS	ENSSSCG00000005316
1	264175570	264175909	7.77513	5.00722	10.7227	intergenic	-
1	264192609	264192859	6.81004	3.0727	6.78237	TSS	ENSSSCG00000005319
1	264234043	264234224	12.4066	6.82994	18.5285	utr_5	ENSSSCG00000005322
1	264234884	264235115	16.3441	5.57881	10.9076	CDS	ENSSSCG00000005322
1	264392285	264392512	2.21813	4.23916	2.67274	intergenic	-
1	264392739	264393122	5.69364	4.52468	4.24665	intergenic	-
1	264393421	264393853	3.42529	2.27743	3.10029	intergenic	-
1	264674082	264674281	5.94743	2.3162	9.96472	Stop	ENSSSCG00000005338
1	266103962	266104175	8.13491	4.46573	19.4413	intergenic	-
1	266106351	266106550	7.05378	4.05335	5.69412	intron	ENSSSCG00000005347
1	266124780	266124982	3.23477	2.74582	3.83481	Stop	ENSSSCG00000005347
1	266612046	266612326	15.3712	10.185	11.3882	Stop	ENSSSCG00000005356
1	266626287	266626718	12.3302	6.04876	12.4573	intergenic	-
1	266866078	266866271	4.54311	1.76438	3.78921	intergenic	-
1	266866739	266867015	9.38616	4.2071	10.0824	intergenic	-
1	267166543	267166751	3.80644	2.03886	3.36998	CDS	ENSSSCG00000005361
1	267167230	267167903	7.12135	5.50949	6.00786	Stop	ENSSSCG00000005361
1	267258002	267258207	3.43559	2.09205	2.89373	intron	ENSSSCG00000025655
1	267393696	267393910	12.1219	2.81972	6.05204	CDS	ENSSSCG00000005364
1	267880010	267880194	9.80647	3.19619	5.59841	CDS	ENSSSCG00000005370
1	268051444	268051651	4.11078	2.54576	4.22506	TSS	ENSSSCG00000005373
1	268081764	268082012	13.7291	2.7894	10.1993	intron	ENSSSCG00000005373
1	269211218	269212060	9.16594	5.17155	8.50987	CDS	ENSSSCG00000005383
1	269215428	269215642	3.26882	3.47494	2.04353	CDS	ENSSSCG00000005383
1	270000281	270000657	19.0817	6.52096	25.0134	Stop	ENSSSCG00000005386
1	270382919	270383207	18.7957	8.68203	11.5625	CDS	ENSSSCG00000005388
1	275504554	275505097	14.6213	6.62057	12.9683	Stop	ENSSSCG00000026173
1	276190803	276191025	5.98603	1.84023	3.67213	intergenic	-
1	278945686	278945868	3.5265	1.85611	3.55975	Stop	ENSSSCG00000005436
1	279059096	279059309	27.9484	10.5765	22.4714	CDS	ENSSSCG00000005437
1	280616263	280616567	6.02856	3.83544	6.33807	intergenic	ENSSSCG00000005444
1	280912991	280913220	4.62417	7.9498	3.35061	intergenic	-
1	281918796	281919065	9.30355	5.17357	7.93107	nc_exon	ENSSSCG00000005451
1	281919458	281919712	2.16559	3.15782	2.11495	nc_exon	ENSSSCG00000005451
1	281949046	281949507	22.1667	11.4879	16.6078	intergenic	-
1	281951353	281951624	6.59335	3.00732	6.15628	intergenic	-
1	283177321	283177628	16.8784	4.46475	10.3549	intergenic	-
1	283224626	283224826	3.64239	2.12194	4.88065	Stop	ENSSSCG00000005460
1	283440533	283440793	7.64819	3.12174	9.61532	intergenic	-
1	283777430	283777632	7.88018	2.49054	11.9058	Stop	ENSSSCG00000005466
1	284186820	284187077	12.2581	7.90795	11.4899	Stop	ENSSSCG00000026194
1	284359000	284359233	12.8028	10.0867	37.0698	intergenic	-
1	284598752	284599034	8.34716	5.34024	3.95101	utr_3	ENSSSCG00000023714
1	284607227	284607552	6.72622	3.58881	7.99887	CDS	ENSSSCG00000005477
1	284676382	284676711	3.58858	1.91771	3.96553	Stop	ENSSSCG00000024648
1	284829898	284830236	5.59175	2.97071	4.43698	Stop	ENSSSCG00000005478
1	284950081	284950337	20.1966	7.02927	37.1135	intron	ENSSSCG00000005480
1	284951818	284952150	10.5847	7.63214	20.8242	intron	ENSSSCG00000005480
1	284952354	284952546	7.71804	5.57881	11.7368	intron	ENSSSCG00000005480
1	284990162	284990400	8.61208	5.27372	6.34489	CDS	ENSSSCG00000005480
1	284990546	284990716	17.7742	6.35087	14.4386	CDS	ENSSSCG00000005480
1	284993956	284994097	9.80645	2.34111	3.44149	Stop	ENSSSCG00000005481
1	285698998	285699182	25.8237	9.8065	22.7765	CDS	ENSSSCG00000005484
1	285699580	285700086	15.904	8.93148	15.3903	Stop	ENSSSCG00000005484
1	285703708	285704014	8.01879	9.93725	9.32332	intergenic	-
1	285710467	285710646	6.96877	3.92794	6.00983	intron	ENSSSCG00000005485
1	286781254	286781869	27.7266	12.2535	20.6232	CDS	ENSSSCG00000005494
1	289784533	289784711	10.2423	4.32838	5.8749	CDS	ENSSSCG00000005503
1	289785082	289785314	12.3602	3.356	8.03017	Stop	ENSSSCG00000005503
1	292737835	292738072	9.98805	4.64901	8.94788	CDS	ENSSSCG00000005506
1	292827548	292827700	6.33333	3.23317	10.2494	CDS	ENSSSCG00000005506
1	292891699	292892086	13.6005	6.45561	9.52959	Stop	ENSSSCG00000021318
1	292927726	292927957	7.93169	4.18411	6.55274	intergenic	-
1	293629421	293629691	8.96201	4.8252	8.64284	utr_3	ENSSSCG00000005518
1	293630157	293630533	4.6819	3.0226	2.65934	utr_3	ENSSSCG00000005518
1	293631516	293631758	6.32445	3.62621	5.88933	CDS	ENSSSCG00000005518
1	294001362	294001829	13.0124	9.64668	20.0197	intergenic	ENSSSCG00000005524
1	294010924	294011178	5.26279	2.64122	5.09759	CDS	ENSSSCG00000005524
1	297214717	297214949	5.61828	2.99451	4.65472	CDS	ENSSSCG00000005574
1	297292243	297292504	33.8323	12.1041	26.7697	CDS	ENSSSCG00000005576
1	297476966	297477226	3.4174	2.41668	3.8503	Stop	ENSSSCG00000023197
1	297483176	297483391	11.1855	7.79765	17.6455	intergenic	-
1	299470751	299470950	2.12031	2.39251	2.46391	TSS	ENSSSCG00000005596
1	299478471	299478729	12.3102	4.83234	9.3984	Stop	ENSSSCG00000005596
1	299840592	299840834	3.07586	2.11339	3.88893	intron	ENSSSCG00000005602
1	299840592	299840834	3.07586	2.11339	3.88893	Stop	ENSSSCG00000029141
1	299984397	299984632	7.78493	3.82751	9.42021	intron	ENSSSCG00000028891
1	300175979	300176200	3.21878	1.70464	2.89095	TSS	ENSSSCG00000029169
1	301002203	301002767	11.4068	7.25005	11.0086	intergenic	-
1	301003621	301003983	23.2903	8.36818	19.2321	intergenic	-
1	301921613	301921789	6.44683	2.89401	9.3998	utr_3	ENSSSCG00000005614
1	301922253	301922776	7.54212	4.88144	5.44761	Stop	ENSSSCG00000005614
1	302142156	302142397	3.57197	3.08398	5.76674	intergenic	-
1	302142617	302143089	7.74937	4.68521	8.84294	TSS	ENSSSCG00000005621
1	302232210	302232757	6.76641	3.78418	6.2272	utr_3	ENSSSCG00000005625
1	302293934	302294138	4.35842	1.97583	3.49781	intergenic	-
1	302386756	302386992	4.08602	3.01738	6.41185	intergenic	-
1	302448497	302448739	46.8531	22.8382	85.6829	intergenic	-
1	302565634	302565854	7.1078	4.09037	7.22459	Stop	ENSSSCG00000005636
1	302576541	302576840	4.35843	2.45884	3.33629	intron	ENSSSCG00000022655
1	302581056	302581273	3.1246	2.91068	4.98562	TSS	ENSSSCG00000022655
1	302606516	302606741	6.53763	3.53034	10.0664	intergenic	ENSSSCG00000022295
1	302736514	302736922	5.89068	4.54421	5.97632	utr_3	ENSSSCG00000005645
1	302758526	302758803	7.12545	3.93351	7.18981	intron	ENSSSCG00000005645
1	302758526	302758803	7.12545	3.93351	7.18981	Stop	ENSSSCG00000005646
1	302804139	302804407	6.18425	1.48187	5.56101	intron	ENSSSCG00000005645
1	302804139	302804407	6.18425	1.48187	5.56101	utr_3	ENSSSCG00000005649
1	303105146	303105487	12.5996	6.02135	14.3497	utr_3	ENSSSCG00000005657
1	303105146	303105487	12.5996	6.02135	14.3497	utr_3	ENSSSCG00000005658
1	303166049	303166300	3.01198	1.50628	3.01569	intergenic	-
1	303170181	303170393	2.8319	1.62808	2.78992	CDS	ENSSSCG00000005661
1	303173299	303173546	2.96547	2.57881	3.52745	intron	ENSSSCG00000005661
1	303173299	303173546	2.96547	2.57881	3.52745	intron	ENSSSCG00000005662
1	303173707	303173822	3.62412	1.68411	3.42064	intron	ENSSSCG00000005662
1	303173707	303173822	3.62412	1.68411	3.42064	Stop	ENSSSCG00000005661
1	303245530	303245736	4.11745	3.71656	4.57651	CDS	ENSSSCG00000005664
1	303252805	303253389	15.8368	9.11216	13.9933	Stop	ENSSSCG00000005664
1	303273652	303273983	17.2823	10.5858	16.3675	Stop	ENSSSCG00000005666
1	303274481	303274700	14.9276	5.04334	11.3882	CDS	ENSSSCG00000005666
1	303330077	303330294	4.7175	2.74804	5.78449	utr_3	ENSSSCG00000005668
1	303333546	303333933	5.14157	2.06931	3.25379	intron	ENSSSCG00000005668
1	303348255	303348456	6.95881	3.03639	6.25804	TSS	ENSSSCG00000005668
1	303378715	303379487	4.37161	3.09028	5.1031	utr_3	ENSSSCG00000005669
1	303398727	303399115	6.43011	4.22395	7.18744	utr_3	ENSSSCG00000005670
1	303418090	303418290	3.17076	1.61885	4.97361	utr_5	ENSSSCG00000005672
1	303446367	303446773	4.25627	1.89052	5.55624	utr_3	ENSSSCG00000005672
1	303470162	303470963	36.7587	13.88	30.0404	nc_exon	ENSSSCG00000005673
1	303695599	303696016	7.06147	4.9382	8.54118	Stop	ENSSSCG00000005678
1	303697034	303697759	11.7069	7.5041	9.73668	Stop	ENSSSCG00000005679
1	303770379	303770609	29.8279	11.9247	15.0487	Stop	ENSSSCG00000005680
1	303865049	303865232	4.67441	3.62373	3.34416	intron	ENSSSCG00000005683
1	303869023	303869719	9.68706	5.95876	10.1031	intergenic	ENSSSCG00000005683
1	303873031	303873441	7.13502	4.3274	5.88923	Stop	ENSSSCG00000025964
1	303922217	303922428	9.6179	5.23013	12.527	CDS	ENSSSCG00000024341
1	303934959	303935215	6.12903	2.86056	5.96524	utr_3	ENSSSCG00000024341
1	304435199	304435411	39.0895	9.62344	21.2309	intron	ENSSSCG00000005699
1	304439511	304439731	6.92221	3.59287	12.6453	intron	ENSSSCG00000005699
1	304444955	304445237	7.65594	4.60252	6.66248	CDS	ENSSSCG00000005699
1	304476336	304476543	8.89845	5.92748	9.43595	intron	ENSSSCG00000005701
1	304479580	304479780	2.52372	4.70712	3.46783	intron	ENSSSCG00000005701
1	304480128	304480386	6.78634	5.28243	8.86655	intron	ENSSSCG00000005701
1	304575285	304575483	6.50212	4.56679	6.50753	TSS	ENSSSCG00000005702
1	304679985	304680206	4.03934	2.20216	4.20281	intergenic	-
1	304685618	304685930	12.9032	7.97595	13.5289	intergenic	ENSSSCG00000005706
1	304826254	304826822	3.38197	3.14875	2.91649	CDS	ENSSSCG00000005706
1	304827037	304828188	5.89186	5.29947	4.52678	Stop	ENSSSCG00000005706
1	305271867	305272068	5.11829	2.13307	4.20002	Stop	ENSSSCG00000028172
1	305272324	305272628	4.23023	3.47863	5.09965	CDS	ENSSSCG00000028172
1	305284069	305284169	4.24946	3.37947	2.69453	TSS	ENSSSCG00000028172
1	305285688	305286070	5.0723	4.66689	8.98484	intergenic	-
1	305417165	305418709	8.36102	5.52963	6.64575	CDS	ENSSSCG00000005715
1	305435193	305435437	4.74299	2.97167	4.68026	Stop	ENSSSCG00000005715
1	305435750	305436198	10.4659	4.53614	10.0282	utr_3	ENSSSCG00000005715
1	305438527	305438899	7.67341	3.91554	5.35517	utr_3	ENSSSCG00000005715
1	305457588	305457785	2.28817	2.05535	2.99346	Stop	ENSSSCG00000005717
1	305461904	305462167	13.1336	7.8234	15.6724	CDS	ENSSSCG00000005717
1	305502418	305502793	3.50799	1.66291	3.96762	utr_3	ENSSSCG00000005719
1	305504236	305504486	7.55913	3.7883	6.87891	Stop	ENSSSCG00000005719
1	305632920	305633148	4.83111	3.4684	11.0628	TSS	ENSSSCG00000005719
1	306154461	306155017	17.6976	8.45189	15.1758	intergenic	ENSSSCG00000005724
1	306234753	306235078	13.0512	9.26478	9.18028	CDS	ENSSSCG00000005725
1	306417291	306417671	26.6467	24.2012	57.0495	Stop	ENSSSCG00000005729
1	306712837	306713261	8.54921	5.00599	8.63412	Stop	ENSSSCG00000005738
1	306730375	306730562	6.26523	2.46978	5.9938	Stop	ENSSSCG00000005739
1	306795402	306796030	18.7957	10.0911	15.2162	intron	ENSSSCG00000005733
1	306795402	306796030	18.7957	10.0911	15.2162	intron	ENSSSCG00000005739
1	306795402	306796030	18.7957	10.0911	15.2162	Stop	ENSSSCG00000005733
1	306825182	306825469	9.99506	4.3933	16.9806	intron	ENSSSCG00000005739
1	306985626	306986478	5.06553	4.12904	4.84529	utr_3	ENSSSCG00000023173
1	306995477	306995717	2.84318	3.68046	3.12042	utr_5	ENSSSCG00000023173
1	307039141	307039351	3.15937	2.11715	4.43697	intergenic	ENSSSCG00000021113
1	307039875	307040254	2.3716	2.29671	3.29049	intergenic	-
1	307041178	307041428	18.9124	5.63245	7.97175	utr_3	ENSSSCG00000024166
1	307093733	307093931	3.56217	4.12136	4.92239	intergenic	-
1	307111081	307111284	3.75914	3.28518	3.51201	CDS	ENSSSCG00000026425
1	307112681	307112892	2.65311	2.86911	3.10587	CDS	ENSSSCG00000026425
1	307128723	307128958	3.03047	2.12788	3.8164	intergenic	ENSSSCG00000026425
1	307204229	307204461	4.74219	3.30324	6.17926	utr_3	ENSSSCG00000005740
1	307239656	307239810	4.4129	2.34563	13.7269	intron	ENSSSCG00000005740
1	307264515	307264827	3.66441	3.33678	4.77285	CDS	ENSSSCG00000005740
1	307276120	307276361	5.76344	3.04001	8.02598	utr_3	ENSSSCG00000005743
1	307276641	307277031	9.54565	4.37781	13.9988	utr_3	ENSSSCG00000005743
1	307277780	307278103	2.37253	3.28488	3.00561	utr_3	ENSSSCG00000005743
1	307448655	307449097	10.3586	4.2792	6.47412	utr_5	ENSSSCG00000005743
1	307477753	307478170	5.16553	4.20635	6.46417	utr_3	ENSSSCG00000005749
1	307478457	307478653	2.23914	1.66799	2.34647	Stop	ENSSSCG00000005749
1	307481921	307482195	4.28168	3.86886	6.07372	CDS	ENSSSCG00000005749
1	307484665	307484925	3.76821	2.97633	3.47725	CDS	ENSSSCG00000005749
1	307490975	307491065	2.7318	2.88295	4.82258	CDS	ENSSSCG00000005749
1	307549169	307549371	2.95884	2.025	2.81842	Stop	ENSSSCG00000024912
1	307549985	307550203	6.94624	5.14967	14.1336	utr_3	ENSSSCG00000024912
1	307555995	307556321	10.164	6.74106	20.6848	intergenic	-
1	307593812	307594120	35.9569	8.54255	12.6898	intergenic	-
1	307673120	307673314	6.53763	4.6324	19.726	intergenic	-
1	307851234	307851509	8.50281	4.03882	9.4858	utr_5	ENSSSCG00000005750
1	308173950	308174208	3.87341	2.15525	4.07287	Stop	ENSSSCG00000005751
1	308175670	308175888	8.82279	3.87902	8.70139	intergenic	-
1	308352185	308352747	30.1566	17.707	27.3129	Stop	ENSSSCG00000029715
1	308620457	308620665	7.17972	4.23916	19.5227	intergenic	-
1	308621621	308621856	5.31183	4.7725	5.05013	CDS	ENSSSCG00000005761
1	308622226	308624269	14.2207	8.89126	13.1527	CDS	ENSSSCG00000005761
1	308638374	308638623	7.82237	2.87657	7.28611	Stop	ENSSSCG00000005759
1	308853115	308853430	16.2326	5.26003	13.5303	Stop	ENSSSCG00000005753
1	308859625	308860081	11.8835	6.03288	8.17511	CDS	ENSSSCG00000005753
1	308860193	308860580	16.6301	8.49896	14.8047	CDS	ENSSSCG00000005753
1	308860912	308861453	17.1613	6.53129	11.9931	CDS	ENSSSCG00000005753
1	309952334	309952546	14.7097	8.83311	16.2689	CDS	ENSSSCG00000023376
1	310005067	310005699	22.9144	9.29262	15.6646	CDS	ENSSSCG00000005774
1	310007146	310007461	12.0177	4.93127	9.05401	CDS	ENSSSCG00000005774
1	310068986	310069388	13.7183	5	13.1778	Stop	ENSSSCG00000005773
1	311022224	311022416	2.40354	1.47256	3.71011	CDS	ENSSSCG00000005781
1	311333817	311334113	4.20276	1.87044	4.4231	CDS	ENSSSCG00000028791
1	311558910	311559556	17.2809	8.24515	18.2255	CDS	ENSSSCG00000005787
1	311675803	311676016	11.2658	6.65653	12.6084	intergenic	-
1	311678270	311678492	13.0208	8.59236	30.6058	intergenic	-
1	313730012	313730228	54.5893	11.231	59.7881	intron	ENSSSCG00000005828
1	313734762	313735180	6.15978	3.13808	9.9288	intron	ENSSSCG00000005828
1	313757015	313757203	9.50928	5.82786	15.9731	intergenic	-
1	313758231	313758571	2.37124	1.68009	3.17196	Stop	ENSSSCG00000005840
1	313759841	313760033	10.6236	8.40557	12.503	intergenic	-
1	313763846	313764254	11.1336	5.11739	10.6279	intergenic	-
1	313772458	313772828	3.47312	1.76611	3.57916	Stop	ENSSSCG00000005838
1	313774831	313775151	3.80561	3.20279	5.85491	CDS	ENSSSCG00000005838
1	313854067	313854373	3.56778	3.23019	3.66676	intergenic	-
1	313854680	313855087	11.5778	8.39169	12.9236	intergenic	ENSSSCG00000005837
1	313865177	313865382	18.1419	10.9833	13.1507	intergenic	-
1	313920900	313921443	12.8219	5.97728	13.685	Stop	ENSSSCG00000005841
1	313982107	313982320	3.82391	2.64882	5.38681	intergenic	-
1	314012261	314012571	10.7744	7.26712	11.8392	intergenic	-
1	314013165	314013296	2.4808	2.09205	2.37254	CDS	ENSSSCG00000005853
1	314013459	314013865	4.41291	3.51642	4.06723	intron	ENSSSCG00000005853
1	314014155	314014551	9.54962	4.4892	6.46619	intron	ENSSSCG00000005853
1	314084121	314084425	8.73563	4.10662	14.9583	Stop	ENSSSCG00000005844
1	314112255	314112516	5.96187	3.67604	7.77857	Stop	ENSSSCG00000005845
1	314112744	314113210	10.5598	6.59547	9.44567	CDS	ENSSSCG00000005845
1	314117532	314117749	4.77208	3.13808	5.11164	Stop	ENSSSCG00000005846
1	314125576	314125965	12.3061	8.20084	25.0014	utr_5	ENSSSCG00000005846
1	314136288	314136520	3.22967	3.0003	3.86644	CDS	ENSSSCG00000005849
1	314148039	314148215	21.2473	6.27616	15.2521	Stop	ENSSSCG00000005857
1	314164209	314164449	5.86255	2.95349	4.8374	intergenic	-
2	60035	60302	6.26523	4.75467	10.2494	intron	ENSSSCG00000012836
2	145757	145988	2.60365	1.83055	2.95955	CDS	ENSSSCG00000012840
2	168658	168883	16.1398	9.10043	20.3361	utr_5	ENSSSCG00000012843
2	193783	194212	11.4681	6.052	11.094	intron	ENSSSCG00000012846
2	198704	199195	5.97558	3.90466	7.41949	utr_3	ENSSSCG00000012846
2	199847	200038	5.17563	4.00708	6.62869	utr_3	ENSSSCG00000012846
2	240589	241183	20.3998	10.0432	17.7096	utr_3	ENSSSCG00000012849
2	243649	243924	19.3157	7.98283	19.8278	intron	ENSSSCG00000012849
2	246482	246850	3.72768	2.31098	4.62501	TSS	ENSSSCG00000012850
2	269154	269364	2.72958	2.04223	2.95164	Stop	ENSSSCG00000012850
2	297759	297989	4.22413	2.92384	4.10462	Stop	ENSSSCG00000012852
2	304800	306523	5.98967	4.27029	6.24187	CDS	ENSSSCG00000029723
2	306971	307367	6.08215	3.97225	5.79062	CDS	ENSSSCG00000029723
2	333707	333927	9.35556	4.50953	10.0155	TSS	ENSSSCG00000029723
2	343032	343361	4.94781	3.53905	5.26196	CDS	ENSSSCG00000012854
2	420456	420808	14.3594	4.40432	6.42193	intergenic	-
2	421094	421484	8.11367	2.55695	13.0777	intergenic	-
2	439950	440211	4.59677	2.33113	4.67865	utr_3	ENSSSCG00000012856
2	743685	744259	5.65876	3.56503	6.00952	intergenic	-
2	744531	744762	2.42294	3.53034	3.42503	intergenic	-
2	851384	851815	3.05544	2.03626	2.78221	intergenic	ENSSSCG00000021181
2	1237527	1237825	12.725	6.62482	10.3578	intergenic	-
2	1238105	1238499	6.02687	3.85723	3.55506	intergenic	-
2	1388805	1389036	6.01228	3.69716	4.30139	Stop	ENSSSCG00000030888
2	1480196	1480498	4.96158	3.11193	6.6248	intergenic	-
2	1564278	1564440	4.12688	4.35844	3.85316	utr_3	ENSSSCG00000029328
2	1565118	1565566	4.01496	5.16039	3.87234	Stop	ENSSSCG00000029328
2	1567473	1567895	4.0677	3.7082	3.92027	TSS	ENSSSCG00000029328
2	2725653	2726088	6.60172	3.88726	6.08576	Stop	ENSSSCG00000012875
2	2750928	2751145	2.07025	2.2116	3.6605	intergenic	-
2	2785316	2785532	15.5269	6.65272	15.0311	Stop	ENSSSCG00000012879
2	2872308	2872597	5.2473	2.25054	4.89725	utr_3	ENSSSCG00000012880
2	2974966	2975260	5.36454	2.41823	5.49597	utr_3	ENSSSCG00000012884
2	3342645	3342922	7.41769	6.82007	8.4056	intergenic	-
2	3368710	3368913	2.06452	1.18382	2.28119	intergenic	-
2	3401127	3401384	2.04924	2.32488	2.52989	intergenic	-
2	3416355	3416869	2.30303	1.73083	2.44549	TSS	ENSSSCG00000012889
2	3472675	3473115	10.6764	5.2592	9.21171	intron	ENSSSCG00000012889
2	3473288	3474100	9.99747	8.63194	9.17865	intergenic	ENSSSCG00000012889
2	3550011	3550623	11.8206	4.44455	9.55558	Stop	ENSSSCG00000012893
2	3744114	3744398	4.00843	2.66784	2.88226	utr_5	ENSSSCG00000012902
2	3760447	3760645	4.74757	2.71401	3.15616	Stop	ENSSSCG00000012903
2	3781372	3781548	15.2545	2.47243	5.5779	utr_3	ENSSSCG00000012905
2	3806442	3807075	9.14574	3.94731	9.45683	Stop	ENSSSCG00000012909
2	3816288	3816994	4.88842	3.02154	4.42769	CDS	ENSSSCG00000012911
2	3817886	3818141	3.21207	2.70148	3.54865	CDS	ENSSSCG00000012911
2	3819750	3819968	2.70968	2.62222	3.56231	CDS	ENSSSCG00000012911
2	3831126	3831441	12.0351	5.34218	16.5739	Stop	ENSSSCG00000012912
2	3946116	3946380	6.94624	3.51515	5.63715	utr_3	ENSSSCG00000012916
2	3969112	3969346	4.08602	1.67364	3.12668	Stop	ENSSSCG00000027956
2	4021692	4021904	6.5775	2.46218	5.12659	utr_3	ENSSSCG00000029637
2	4023955	4024171	5.01792	2.32133	6.47742	Stop	ENSSSCG00000029637
2	4028705	4028982	4.23461	2.96375	5.13949	CDS	ENSSSCG00000029637
2	4047002	4047233	14.4946	5.82787	10.6619	CDS	ENSSSCG00000029637
2	4238220	4238420	2.54775	1.53417	4.41584	Stop	ENSSSCG00000022726
2	4448239	4448740	10.164	2.76733	7.35289	intergenic	-
2	5120403	5120571	6.85743	3.75795	5.51043	CDS	ENSSSCG00000012940
2	5125983	5126176	5.65988	3.50297	7.67893	intron	ENSSSCG00000012939
2	5149212	5149409	16.671	6.79917	17.0823	Stop	ENSSSCG00000029949
2	5349088	5349287	9.19355	2.17252	9.84267	intergenic	-
2	5461380	5461669	23.8623	7.28948	22.3698	CDS	ENSSSCG00000012963
2	5470380	5470877	10.2968	7.64324	13.5676	CDS	ENSSSCG00000012963
2	5476585	5477053	11.5607	6.36983	12.7008	CDS	ENSSSCG00000012963
2	5514215	5514557	6.76838	4.49373	7.4372	CDS	ENSSSCG00000012965
2	5515387	5515758	9.56614	5.4344	12.5693	intergenic	ENSSSCG00000012965
2	5515939	5516148	9.94266	5.7669	9.1889	TSS	ENSSSCG00000012966
2	5516771	5516949	5.19882	3.87902	3.3845	CDS	ENSSSCG00000012966
2	5517362	5517739	4.88984	3.97633	4.2087	Stop	ENSSSCG00000012966
2	5540785	5541744	15.9993	10.2523	14.6178	CDS	ENSSSCG00000012968
2	5540785	5541744	15.9993	10.2523	14.6178	utr_3	ENSSSCG00000012967
2	5566823	5567026	22.2688	5.75314	26.6809	Stop	ENSSSCG00000012971
2	5566823	5567026	22.2688	5.75314	26.6809	utr_3	ENSSSCG00000012973
2	5653147	5653752	11.9251	6.14263	11.4967	CDS	ENSSSCG00000012978
2	5653902	5654124	6.16045	6.43306	11.8189	CDS	ENSSSCG00000012978
2	5654787	5655342	14.8118	8.33215	10.9815	Stop	ENSSSCG00000012978
2	5667530	5667873	4.89841	2.65423	4.8241	Stop	ENSSSCG00000012979
2	5667530	5667873	4.89841	2.65423	4.8241	utr_3	ENSSSCG00000012979
2	5667530	5667873	4.89841	2.65423	4.8241	utr_3	ENSSSCG00000012980
2	5668603	5668847	2.69197	2.64412	2.70415	Stop	ENSSSCG00000012980
2	5699398	5699848	3.27971	1.79534	3.28037	intergenic	-
2	5762255	5762565	2.55639	1.28446	3.43454	CDS	ENSSSCG00000012982
2	5767652	5767985	5.53883	2.9701	4.7225	CDS	ENSSSCG00000012982
2	5771840	5772067	9.0768	4.64005	9.52407	Stop	ENSSSCG00000012983
2	5788870	5789698	12.3476	6.11676	13.2157	CDS	ENSSSCG00000012983
2	5808003	5808185	4.12027	2.64164	3.93782	intergenic	-
2	5843595	5843844	6.6684	3.02465	5.16071	Stop	ENSSSCG00000012984
2	5843595	5843844	6.6684	3.02465	5.16071	utr_3	ENSSSCG00000012985
2	5865173	5865488	5.84813	4.72125	6.83981	utr_5	ENSSSCG00000012988
2	5874034	5874318	4.49462	2.75671	4.71405	CDS	ENSSSCG00000012988
2	5880960	5881193	2.78654	1.86465	2.99813	intergenic	-
2	5905112	5905419	5.38749	3.49129	7.0707	utr_3	ENSSSCG00000020737
2	5931450	5931651	7.42294	3.99392	8.25065	intergenic	-
2	5943067	5943499	8.89169	4.88725	8.52378	intergenic	-
2	5944254	5944910	3.44036	2.77635	4.12666	intergenic	-
2	5957103	5957366	8.2742	3.72488	6.63997	Stop	ENSSSCG00000012992
2	6030313	6030538	15.9355	9.66328	22.2501	utr_3	ENSSSCG00000012996
2	6030704	6030938	20.8898	11.3217	24.9998	Stop	ENSSSCG00000012996
2	6031249	6031506	7.06298	7.16528	4.33837	CDS	ENSSSCG00000012996
2	6207757	6208018	3.29251	3.41498	4.31538	CDS	ENSSSCG00000013003
2	6208395	6208607	13.871	11.5661	11.2752	Stop	ENSSSCG00000013003
2	6226616	6226851	3.90977	2.33742	4.84998	TSS	ENSSSCG00000013005
2	6270554	6270766	7.35484	3.0926	5.93814	Stop	ENSSSCG00000013011
2	6306638	6306851	59.6558	23.0126	15.0487	intergenic	-
2	6413284	6413791	8.53023	5.94194	7.85271	Stop	ENSSSCG00000023890
2	6452208	6452900	5.7099	3.74024	6.05594	Stop	ENSSSCG00000013017
2	6496250	6496501	3.74127	3.5755	5.53141	CDS	ENSSSCG00000013019
2	6524012	6524401	3.79759	2.51046	3.64379	intron	ENSSSCG00000013021
2	6536180	6536335	4.36953	1.68595	3.67926	Stop	ENSSSCG00000013021
2	6869903	6870301	2.98575	2.26293	3.49707	Stop	ENSSSCG00000013028
2	6870789	6870992	2.21812	2.44663	3.16618	CDS	ENSSSCG00000013028
2	6876798	6876989	2.11458	1.67092	2.13387	CDS	ENSSSCG00000013028
2	6877987	6878240	11.9516	5.80069	13.2185	intron	ENSSSCG00000013028
2	6878428	6878645	2.63717	1.52149	2.59097	utr_5	ENSSSCG00000013028
2	6896467	6896752	4.33964	2.56095	3.01392	intergenic	-
2	6908682	6908927	12.0538	8.89122	10.4731	intron	ENSSSCG00000013033
2	6912132	6912340	7.88604	5.91232	7.41862	Stop	ENSSSCG00000013034
2	6932087	6932569	5.0937	2.85305	5.20698	TSS	ENSSSCG00000013035
2	6937010	6937611	20.9409	7.16911	21.7822	intergenic	-
2	6939764	6939986	3.45685	1.68714	3.66832	utr_3	ENSSSCG00000013037
2	7054804	7055152	5.86945	3.50864	6.92575	CDS	ENSSSCG00000013043
2	7284215	7284550	7.55912	3.32583	8.90722	utr_3	ENSSSCG00000022687
2	7348164	7348574	21.0084	9.29052	22.207	intergenic	-
2	7349007	7349218	2.88251	2.15743	3.15665	intergenic	-
2	7554698	7555225	25.5376	13.3542	22.7286	Stop	ENSSSCG00000013053
2	8265815	8266025	2.59072	2.56143	2.39896	TSS	ENSSSCG00000022404
2	8322572	8322835	6.58871	2.93562	9.67092	intron	ENSSSCG00000022866
2	8331751	8331997	5.40911	2.21511	4.96629	CDS	ENSSSCG00000020665
2	8331751	8331997	5.40911	2.21511	4.96629	utr_3	ENSSSCG00000020665
2	8331751	8331997	5.40911	2.21511	4.96629	utr_3	ENSSSCG00000021431
2	8365442	8365656	21.7921	21.182	24.81	Stop	ENSSSCG00000025351
2	8371787	8371987	8.34716	3.3583	7.82937	intergenic	ENSSSCG00000028413
2	8380323	8381079	12.3662	6.31996	14.3282	CDS	ENSSSCG00000028542
2	8391642	8391840	1.61625	2.41729	2.05129	Stop	ENSSSCG00000028542
2	8392156	8392372	2.45161	2.74368	3.8201	intergenic	-
2	8409505	8409850	3.53243	2.06773	3.23393	CDS	ENSSSCG00000020823
2	8419674	8419999	4.25829	3.37464	5.37211	CDS	ENSSSCG00000023110
2	8423449	8424187	4.70016	3.18188	5.07367	Stop	ENSSSCG00000024995
2	8428746	8428951	6.02398	4.11662	5.50042	CDS	ENSSSCG00000027847
2	8443605	8443748	7.29198	4.53278	9.24368	CDS	ENSSSCG00000028275
2	8444056	8444288	4.87599	5.64854	8.33783	CDS	ENSSSCG00000028275
2	8444436	8444563	4.14439	5.23013	5.96526	CDS	ENSSSCG00000028275
2	8445015	8445275	5.69018	3.84352	5.32673	CDS	ENSSSCG00000028275
2	8468536	8468732	3.99316	2.10131	3.87893	CDS	ENSSSCG00000020809
2	8470478	8470695	4.13555	2.06523	5.05014	utr_3	ENSSSCG00000020809
2	8472320	8472533	11.6452	3.58638	7.321	CDS	ENSSSCG00000022685
2	8483671	8483954	4.26479	3.93568	5.34371	intergenic	-
2	8503058	8503316	10.542	4.21897	6.38431	CDS	ENSSSCG00000013063
2	8505953	8506489	9.62257	4.37315	6.94333	CDS	ENSSSCG00000013063
2	8544112	8544629	7.15638	5.15322	5.41292	intergenic	-
2	8545144	8545452	11.7728	7.03692	9.14155	CDS	ENSSSCG00000027969
2	8548678	8548887	3.33988	2.037	1.7563	Stop	ENSSSCG00000027969
2	8552681	8552898	3.13262	2.92206	2.53354	utr_3	ENSSSCG00000027969
2	8584825	8585248	4.35615	4.05634	3.71946	intergenic	-
2	8586133	8586391	4.37026	4.19599	5.02856	intergenic	-
2	8587025	8587201	3.64943	4.81172	3.94365	intergenic	-
2	8587629	8587816	3.28621	3.16081	4.12675	intergenic	-
2	8651234	8651520	10.5653	8.61433	14.0789	utr_3	ENSSSCG00000013065
2	8651800	8651995	2.35256	2.7403	3.05041	Stop	ENSSSCG00000013065
2	8882347	8882547	16.5995	8.86848	21.963	CDS	ENSSSCG00000013066
2	9119313	9119601	12.9267	4.26541	19.099	TSS	ENSSSCG00000013072
2	9153170	9153559	6.73478	3.77962	7.554	intergenic	-
2	9186970	9187134	2.99642	1.64376	9.86301	Stop	ENSSSCG00000013074
2	9235029	9235247	16.8548	15.3915	36.605	intergenic	-
2	9244527	9245175	3.74368	3.58111	3.79085	CDS	ENSSSCG00000028696
2	9245378	9245625	6.50679	5.01737	5.97415	intergenic	ENSSSCG00000028696
2	9683614	9683847	14.2427	9.83265	19.1529	Stop	ENSSSCG00000013085
2	9712140	9712428	3.27422	2.69069	4.54278	CDS	ENSSSCG00000013087
2	9785692	9786046	5.98231	3.882	5.84538	Stop	ENSSSCG00000013093
2	10168971	10169176	7.28055	2.68978	4.80319	Stop	ENSSSCG00000028762
2	10351552	10351808	8.93817	3.53034	7.64639	Stop	ENSSSCG00000013113
2	10351552	10351808	8.93817	3.53034	7.64639	utr_3	ENSSSCG00000013114
2	10365807	10366455	11.1971	4.26238	10.234	utr_5	ENSSSCG00000013114
2	10457118	10457422	4.35842	2.38297	3.49986	utr_3	ENSSSCG00000013107
2	11089168	11089445	3.7997	2.68508	3.95785	CDS	ENSSSCG00000013118
2	11349998	11350439	7.19342	3.18929	7.65643	TSS	ENSSSCG00000013125
2	11383310	11383734	6.62491	4.1841	4.95329	Stop	ENSSSCG00000013125
2	11383947	11384250	7.46278	3.88163	6.52261	utr_3	ENSSSCG00000013125
2	11807441	11807737	4.04413	4.93725	4.09188	CDS	ENSSSCG00000013144
2	11808261	11808440	3.826	2.61507	2.95551	CDS	ENSSSCG00000013144
2	11809366	11809619	4.95325	5.34221	4.35532	Stop	ENSSSCG00000013144
2	11815547	11815734	19.4961	7.48311	14.2352	Stop	ENSSSCG00000013145
2	11865490	11865687	9.75536	5.1604	7.0252	intergenic	-
2	11867267	11867502	6.78908	3.69186	6.35503	CDS	ENSSSCG00000013146
2	11882423	11882663	21.4434	12.8512	28.0638	CDS	ENSSSCG00000013147
2	11995469	11995822	4.72747	1.54326	5.04676	intergenic	-
2	12030353	12030546	2.41223	1.35286	2.43687	Stop	ENSSSCG00000013153
2	12137930	12138249	22.9812	8.70564	22.6848	Stop	ENSSSCG00000013155
2	12791238	12791630	2.58465	1.6318	2.78729	Stop	ENSSSCG00000013174
2	12812172	12812350	5.70804	2.85565	4.48765	CDS	ENSSSCG00000013174
2	12885072	12885270	4.85051	1.86323	3.28446	utr_3	ENSSSCG00000013178
2	12903317	12903970	17.1187	9.35658	13.0434	intergenic	-
2	12915762	12916344	3.96701	3.01074	5.44465	CDS	ENSSSCG00000013179
2	12971651	12971832	1.71888	1.41633	1.71786	intron	ENSSSCG00000013181
2	12987338	12987541	8.88032	6.67464	14.4543	intergenic	ENSSSCG00000023379
2	13405211	13405410	17.4337	7.20596	21.1495	intron	ENSSSCG00000028527
2	13406993	13407243	6.38907	7.69576	6.57726	intron	ENSSSCG00000028527
2	13407938	13409986	11.6278	8.07392	9.52035	CDS	ENSSSCG00000028527
2	15635712	15635897	5.86255	2.09205	7.40233	Stop	ENSSSCG00000023709
2	16218969	16219801	7.47866	4.47995	6.47666	CDS	ENSSSCG00000013227
2	16226355	16226555	2.2228	1.37885	2.98263	TSS	ENSSSCG00000013226
2	16312145	16312400	4.33119	3.11317	8.81947	intergenic	-
2	16409430	16409631	6.61195	3.13808	9.41882	utr_5	ENSSSCG00000013238
2	16451902	16452333	3.84683	1.95788	3.4909	Stop	ENSSSCG00000013237
2	16549649	16549887	1.38028	1.69495	2.0363	TSS	ENSSSCG00000013241
2	16608936	16609188	3.83956	5.0351	5.86011	CDS	ENSSSCG00000013244
2	17180551	17180793	6.03175	3.81218	6.24965	Stop	ENSSSCG00000023097
2	17181636	17181869	6.21075	2.12635	4.40617	CDS	ENSSSCG00000023097
2	17463606	17464233	5.26837	3.5506	4.7073	Stop	ENSSSCG00000013262
2	17478122	17478358	3.14018	2.35129	4.26194	CDS	ENSSSCG00000013260
2	17478728	17479039	14.5054	7.05554	18.8082	TSS	ENSSSCG00000013260
2	17480304	17480868	7.64847	3.70258	7.65772	utr_3	ENSSSCG00000013259
2	17972997	17973380	15.8537	9.78541	16.9259	Stop	ENSSSCG00000023974
2	18179789	18180011	26.0484	12.8376	29.7489	CDS	ENSSSCG00000013273
2	18667017	18667180	17.1613	15.9519	21.963	intron	ENSSSCG00000013276
2	18921032	18921252	23.5173	11.637	31.182	intergenic	-
2	18924080	18924895	3.82509	2.96804	5.28467	intergenic	-
2	19263540	19263859	2.94194	2.45946	4.34953	utr_3	ENSSSCG00000029521
2	19709254	19709680	8.70322	4.30717	6.61437	Stop	ENSSSCG00000013281
2	19985421	19986059	3.17059	2.66761	2.88217	intergenic	-
2	20491607	20492010	11.8123	5.529	15.4554	intron	ENSSSCG00000013284
2	26786202	26786439	7.00461	4.70712	13.0151	CDS	ENSSSCG00000013291
2	26786671	26786939	11.2966	7.3969	12.8989	Stop	ENSSSCG00000013291
2	27737047	27737846	9.24286	4.59505	10.9889	CDS	ENSSSCG00000013295
2	27783804	27784042	7.7975	4.35844	7.38127	intergenic	-
2	27785279	27785911	4.47949	3.27859	3.50251	CDS	ENSSSCG00000025588
2	27953967	27954160	7.73425	4.28871	14.0789	CDS	ENSSSCG00000028338
2	27954540	27954779	8.47559	4.35844	7.70738	utr_3	ENSSSCG00000028338
2	28946605	28947266	5.2043	3.51605	5.85679	utr_5	ENSSSCG00000013303
2	29412105	29412630	3.34739	2.55402	3.75353	intron	ENSSSCG00000013307
2	29421869	29422394	10.059	5.69134	7.9808	Stop	ENSSSCG00000013307
2	30149655	30149842	6.90908	1.92243	8.32815	CDS	ENSSSCG00000013312
2	30185916	30186195	2.5819	1.63683	2.37563	intergenic	-
2	30477606	30477813	9.53405	3.13808	6.60325	CDS	ENSSSCG00000013314
2	30480852	30481052	8.76637	1.75923	8.57245	CDS	ENSSSCG00000013314
2	30530777	30531212	5.31182	1.73195	3.7057	utr_5	ENSSSCG00000013314
2	31202419	31202664	5.8578	2.63074	5.26783	intron	ENSSSCG00000013318
2	31202419	31202664	5.8578	2.63074	5.26783	intron	ENSSSCG00000024950
2	31202419	31202664	5.8578	2.63074	5.26783	Stop	ENSSSCG00000013318
2	34619350	34619578	40.4516	9.85008	37.8703	CDS	ENSSSCG00000013331
2	35455101	35455656	9.56083	4.40932	9.50386	utr_5	ENSSSCG00000013335
2	35611957	35612419	4.35525	3.00261	4.28877	Stop	ENSSSCG00000013335
2	40059527	40059731	3.93279	3.00044	3.25377	intergenic	-
2	40096137	40096687	5.86412	4.02875	5.10916	intergenic	-
2	41963568	41963778	7.43822	3.77087	6.36774	TSS	ENSSSCG00000013349
2	43606294	43606544	7.77391	4.92248	10.6273	CDS	ENSSSCG00000013361
2	43989870	43990074	5.97581	3.13808	5.30675	CDS	ENSSSCG00000013368
2	44064518	44064723	21.656	8.52318	11.0128	intergenic	-
2	45076371	45076585	19.0511	5.86684	11.0471	intron	ENSSSCG00000025406
2	47651653	47651968	8.59302	3.64964	6.94761	Stop	ENSSSCG00000021819
2	47819029	47819455	17.6742	8.08224	16.9273	intergenic	-
2	50766125	50766372	7.75175	3.57015	6.50756	Stop	ENSSSCG00000013402
2	50780570	50781166	12.9427	5.53319	10.4423	CDS	ENSSSCG00000013402
2	51975434	51976777	9.80232	5.77886	9.11143	CDS	ENSSSCG00000013404
2	52047756	52048128	3.01613	1.53322	2.41709	Stop	ENSSSCG00000013406
2	52274743	52274943	23.372	12.1339	43.6548	Stop	ENSSSCG00000020720
2	52576718	52577102	5.9413	4.20685	7.39277	Stop	ENSSSCG00000013408
2	53040073	53040325	9.62192	6.17156	11.7272	intergenic	-
2	53243247	53243503	2.84165	3.37947	3.96802	CDS	ENSSSCG00000013411
2	53870998	53871549	6.42239	5.46003	9.05716	CDS	ENSSSCG00000013991
2	54412766	54413010	5.86052	3.45433	7.11012	intergenic	ENSSSCG00000013983
2	55199775	55199940	8.46921	5.87384	14.2934	utr_5	ENSSSCG00000013978
2	55235138	55235515	4.92098	3.23977	4.60491	CDS	ENSSSCG00000025900
2	58023243	58023650	17.6153	19.3515	13.751	Stop	ENSSSCG00000013939
2	58278998	58279359	9.41937	5.33474	6.95125	utr_3	ENSSSCG00000013938
2	58560184	58560428	4.35842	3.11973	5.83766	intergenic	-
2	58560877	58561134	5.00051	2.91786	5.14027	intergenic	-
2	58921456	58921706	35.1398	19.09	21.3529	CDS	ENSSSCG00000013913
2	59044347	59044804	4.75698	3.04455	5.3612	CDS	ENSSSCG00000013905
2	59045986	59046219	10.5989	6.35663	16.2388	intron	ENSSSCG00000013905
2	59149168	59149377	4.46397	2.71711	4.65972	utr_3	ENSSSCG00000013896
2	59149168	59149377	4.46397	2.71711	4.65972	utr_3	ENSSSCG00000013896
2	59149168	59149377	4.46397	2.71711	4.65972	utr_3	ENSSSCG00000013897
2	59192812	59193092	5.03226	2.79751	3.53535	Stop	ENSSSCG00000029924
2	59340275	59340474	5.50538	3.89883	3.08252	utr_3	ENSSSCG00000013893
2	59395602	59395857	5.44803	3.55472	6.66454	TSS	ENSSSCG00000013891
2	59505394	59505618	9.96988	5.62592	11.3882	Stop	ENSSSCG00000013886
2	59505795	59505992	7.19141	4.23642	9.06007	CDS	ENSSSCG00000013886
2	59590310	59590521	7.42913	3.91123	9.01567	CDS	ENSSSCG00000013884
2	59591268	59591548	5.22428	4.67441	6.86909	CDS	ENSSSCG00000013884
2	59809531	59809749	5.57831	3.48977	5.17418	Stop	ENSSSCG00000013883
2	59993481	59993712	6.35603	3.13808	6.41185	utr_5	ENSSSCG00000013870
2	60062473	60062617	2.71163	2.22849	3.35139	CDS	ENSSSCG00000013876
2	60062886	60063139	4.01647	2.75504	3.47973	CDS	ENSSSCG00000013876
2	60076697	60077001	5.92473	2.47475	5.74659	Stop	ENSSSCG00000013876
2	60077321	60077843	6.21076	4.07203	5.49959	utr_3	ENSSSCG00000013876
2	60095362	60095684	4.49462	2.73937	4.21195	utr_3	ENSSSCG00000013873
2	60097896	60098170	3.42015	2.67037	4.04319	CDS	ENSSSCG00000013873
2	60106627	60106994	4.97168	3.13807	5.65714	CDS	ENSSSCG00000013873
2	60107704	60107971	3.9049	1.7619	4.12797	intergenic	-
2	60315958	60316154	5.41396	2.74838	6.50756	Stop	ENSSSCG00000013867
2	60322307	60322533	5.69124	4.83336	7.95763	CDS	ENSSSCG00000013867
2	60619927	60620109	4.553	5.29166	6.27514	CDS	ENSSSCG00000013862
2	60620471	60620681	14.8118	6.21078	10.3036	CDS	ENSSSCG00000013862
2	60620836	60621079	16.0172	9.57516	16.6304	Stop	ENSSSCG00000013862
2	60623459	60623893	42.2222	23.5704	26.3917	utr_3	ENSSSCG00000013862
2	60641160	60642011	10.1916	7.89693	13.3041	utr_3	ENSSSCG00000013861
2	60664543	60664888	5.8933	3.07831	6.20252	intergenic	ENSSSCG00000013860
2	60904157	60904425	3.53182	1.75954	4.17007	intergenic	-
2	61021828	61022070	7.81362	3.58867	6.89976	utr_3	ENSSSCG00000013855
2	61156548	61156836	2.08697	2.02923	2.47209	TSS	ENSSSCG00000013849
2	61570156	61570754	5.59507	3.25358	4.86288	CDS	ENSSSCG00000025560
2	61751071	61751277	3.85618	3.28336	6.54143	CDS	ENSSSCG00000013836
2	61796925	61797192	4.46738	2.71314	4.21786	Stop	ENSSSCG00000013838
2	61826670	61826870	31.0538	11.7155	11.853	intergenic	-
2	61827172	61827431	9.29031	6.20143	13.73	intergenic	-
2	61922249	61922468	3.87511	1.36788	3.49781	utr_3	ENSSSCG00000022227
2	62008957	62009362	16.7228	8.45026	11.5796	Stop	ENSSSCG00000013829
2	62008957	62009362	16.7228	8.45026	11.5796	utr_3	ENSSSCG00000013829
2	62008957	62009362	16.7228	8.45026	11.5796	utr_3	ENSSSCG00000013830
2	62012193	62012478	2.5307	1.49114	3.70257	CDS	ENSSSCG00000013829
2	65180086	65180322	3.14746	3.05569	3.08024	TSS	ENSSSCG00000013784
2	65347118	65347429	13.1496	5.09603	11.6461	Stop	ENSSSCG00000013772
2	65350518	65350871	9.55959	5.13186	9.12863	TSS	ENSSSCG00000013771
2	65399298	65400792	7.08636	4.85152	9.13071	CDS	ENSSSCG00000013767
2	65525935	65526159	10.8279	8.2581	21.6918	TSS	ENSSSCG00000013761
2	65683431	65683680	4.66487	3.94637	3.6605	Stop	ENSSSCG00000013755
2	66210328	66211299	2.95967	2.69483	2.98468	intergenic	ENSSSCG00000013753
2	66215056	66215257	4.53015	3.45052	5.09553	CDS	ENSSSCG00000013752
2	66257017	66257380	9.04033	4.341	8.35813	CDS	ENSSSCG00000013751
2	66296246	66296520	6.11362	4.55382	5.46375	Stop	ENSSSCG00000013748
2	66320936	66321180	1.78763	1.39923	2.34789	intergenic	-
2	66322259	66322716	9.76753	5.03401	11.4508	intergenic	-
2	66419535	66419785	10.8209	4.45036	10.0402	intergenic	-
2	66451974	66452448	9.76105	6.18318	8.12153	Stop	ENSSSCG00000013730
2	66454001	66454227	3.87588	4.57637	3.47563	CDS	ENSSSCG00000013730
2	66505196	66505525	6.45762	3.93022	6.45608	utr_5	ENSSSCG00000013735
2	66505671	66505994	3.49218	3.67553	3.21441	utr_5	ENSSSCG00000013735
2	66506372	66506788	10.6661	6.57054	10.8837	Stop	ENSSSCG00000013735
2	66643033	66643459	2.23354	1.88481	2.33904	CDS	ENSSSCG00000013727
2	66645701	66645899	4.92625	2.31932	4.79603	Stop	ENSSSCG00000013727
2	66651493	66651861	8.82579	4.92733	12.6084	intergenic	-
2	66666017	66666338	3.55594	2.50299	4.92853	utr_3	ENSSSCG00000013726
2	66722974	66723279	3.58043	2.34742	4.72709	CDS	ENSSSCG00000013720
2	66861170	66861433	13.7439	4.48297	16.8112	Stop	ENSSSCG00000022634
2	67688809	67689017	43.3119	10.591	53.1452	utr_3	ENSSSCG00000022610
2	68886121	68886526	4.71078	3.39806	3.72938	intron	ENSSSCG00000013671
2	68888111	68888312	5.91137	3.25793	6.1378	intron	ENSSSCG00000013671
2	68899370	68899578	15.6086	11.9818	14.0997	intron	ENSSSCG00000013671
2	68921062	68921265	7.383	2.88085	5.09473	Stop	ENSSSCG00000013670
2	68921539	68921762	5.21754	3.26883	7.29295	CDS	ENSSSCG00000013670
2	69278176	69278457	3.37735	2.37808	4.09064	CDS	ENSSSCG00000013663
2	69290165	69290498	3.63202	3.04906	3.84126	CDS	ENSSSCG00000013662
2	69378291	69378576	7.81455	5.034	6.67883	Stop	ENSSSCG00000013658
2	69401571	69401783	2.1373	1.59792	2.51931	utr_5	ENSSSCG00000013656
2	69459210	69459405	4.25627	3.42864	3.92367	Stop	ENSSSCG00000013651
2	69463617	69463814	19.0409	6.93863	22.8504	intron	ENSSSCG00000013651
2	69540258	69540633	5.82165	5.25167	7.34665	CDS	ENSSSCG00000013647
2	69706060	69706337	6.98337	2.99544	6.41071	utr_5	ENSSSCG00000013645
2	69725136	69725420	6.21661	3.52346	7.08483	utr_5	ENSSSCG00000013643
2	69782914	69783170	6.56583	2.77196	9.09313	intergenic	-
2	69798492	69798683	12.7484	6.66842	5.28739	intergenic	-
2	70007317	70007571	5.85222	2.39821	4.94325	intergenic	ENSSSCG00000013631
2	70036979	70037233	7.9422	2.99478	5.32073	TSS	ENSSSCG00000013633
2	70079016	70079255	2.76593	1.63149	3.60787	intergenic	-
2	70084686	70085379	5.06782	3.4709	4.6958	CDS	ENSSSCG00000013635
2	70085502	70085662	2.22999	2.78243	2.65934	Stop	ENSSSCG00000013635
2	70344668	70344946	3.66777	2.61757	3.50958	CDS	ENSSSCG00000013627
2	70389003	70389204	3.11559	1.84431	4.03817	Stop	ENSSSCG00000013623
2	70424893	70425152	2.58162	2.21275	2.17472	Stop	ENSSSCG00000013619
2	70427179	70427390	3.16223	2.33818	2.21848	Stop	ENSSSCG00000013618
2	70489623	70489827	9.11497	4.30033	8.59926	intergenic	ENSSSCG00000013616
2	70950479	70950709	18.1536	6.46075	17.4077	CDS	ENSSSCG00000029035
2	71183451	71183942	3.34334	2.81643	3.19454	CDS	ENSSSCG00000013602
2	71228731	71228880	13.6473	4.85655	7.09506	utr_3	ENSSSCG00000013601
2	71251669	71251974	2.12141	1.52493	2.31464	utr_3	ENSSSCG00000013600
2	71262691	71262919	4.34515	4.66976	4.35303	TSS	ENSSSCG00000013600
2	71272567	71272945	3.94377	2.98375	5.37898	Stop	ENSSSCG00000013599
2	71311163	71311839	5.0518	3.87505	5.80427	CDS	ENSSSCG00000013598
2	71405348	71405589	2.64472	1.59774	3.11489	Stop	ENSSSCG00000013595
2	71687833	71688012	3.21045	2.85093	4.26725	Stop	ENSSSCG00000013591
2	71699508	71700086	10.6237	4.8663	10.3164	intron	ENSSSCG00000013588
2	71700624	71700833	3.90624	2.80932	3.59078	intron	ENSSSCG00000013588
2	71774315	71774562	10.8961	3.53034	11.1558	Stop	ENSSSCG00000013585
2	71896625	71896993	20.2378	9.17064	15.2677	CDS	ENSSSCG00000013583
2	71898818	71899077	3.82391	4.56283	9.02185	intron	ENSSSCG00000013583
2	71968679	71968946	2.82879	2.42081	2.68734	CDS	ENSSSCG00000013578
2	72155230	72155436	4.08602	1.78397	3.65613	nc_exon	ENSSSCG00000025078
2	72158188	72158485	7.56239	4.96388	10.1857	intergenic	-
2	72174533	72174748	3.1763	2.37308	3.29444	Stop	ENSSSCG00000013569
2	72177852	72178199	8.39491	3.88907	6.35842	intergenic	-
2	72180115	72180375	2.805	3.54487	3.84353	CDS	ENSSSCG00000013568
2	72420038	72420351	4.33119	3.02345	5.44718	Stop	ENSSSCG00000013564
2	72420945	72421150	9.71566	1.87897	3.89135	utr_3	ENSSSCG00000013564
2	72421679	72421984	7.80646	2.58336	6.42455	utr_3	ENSSSCG00000013564
2	72996861	72997410	17.8034	7.22256	17.2567	Stop	ENSSSCG00000026695
2	73169905	73170445	10.0855	5.22134	10.9981	intron	ENSSSCG00000013538
2	73210442	73210791	8.58934	5.38626	8.33779	CDS	ENSSSCG00000013539
2	73220799	73221035	7.8685	2.83668	6.55737	intergenic	-
2	73400832	73401027	4.05333	3.04001	4.06722	CDS	ENSSSCG00000013534
2	73410660	73410969	8.64515	2.56752	5.12249	intergenic	-
2	73691374	73691624	6.82516	2.76889	4.49202	intergenic	-
2	73828756	73828995	2.89011	3.36593	4.49535	CDS	ENSSSCG00000013522
2	73905340	73905544	3.76499	4.0327	3.95876	TSS	ENSSSCG00000013523
2	73933032	73933359	5.25661	4.379	7.08083	CDS	ENSSSCG00000013523
2	74436501	74436703	10.4105	7.40264	14.5564	TSS	ENSSSCG00000024570
2	74701778	74701981	5.44803	5.94583	4.67729	CDS	ENSSSCG00000013517
2	74787355	74788229	6.23848	4.29675	7.08662	intergenic	-
2	74794456	74794778	6.33827	4.16009	5.8033	CDS	ENSSSCG00000013514
2	74805706	74806087	7.94238	3.97273	7.55795	Stop	ENSSSCG00000013513
2	74815289	74815491	10.6237	7.70256	11.7136	CDS	ENSSSCG00000013512
2	74816426	74816656	36.9784	13.7291	32.7004	CDS	ENSSSCG00000013512
2	74817138	74817366	5.55699	4.22434	7.75163	CDS	ENSSSCG00000013512
2	74826361	74826537	4.33366	6.20866	4.61684	CDS	ENSSSCG00000013511
2	74829658	74830004	9.1606	6.27615	12.1731	CDS	ENSSSCG00000013511
2	74898757	74899033	14.4032	12.1719	12.3644	CDS	ENSSSCG00000013509
2	74907441	74907659	5.53185	3.70991	7.03723	TSS	ENSSSCG00000013508
2	74948355	74948785	11.4408	4.77384	12.1748	TSS	ENSSSCG00000013507
2	75072708	75072952	3.71351	2.47947	4.54839	Stop	ENSSSCG00000013501
2	75170915	75171144	2.21091	1.32088	2.16439	utr_5	ENSSSCG00000027127
2	75223235	75223421	6.87812	5.13052	4.23361	intergenic	-
2	75232809	75233005	9.38378	4.43134	4.52816	TSS	ENSSSCG00000029236
2	75233235	75234041	13.8444	8.08148	11.9934	CDS	ENSSSCG00000029236
2	75238709	75239108	6.97477	2.85281	6.52894	Stop	ENSSSCG00000029236
2	75247034	75247307	4.58635	3.65042	5.67563	utr_3	ENSSSCG00000022066
2	75247441	75247798	6.36659	3.78496	7.4271	Stop	ENSSSCG00000022066
2	75268549	75268885	4.38418	2.52455	4.52028	CDS	ENSSSCG00000022066
2	75318191	75318438	5.43045	6.23255	10.4663	intergenic	-
2	75517538	75517948	8.88233	6.91696	6.80335	intergenic	ENSSSCG00000024242
2	75708806	75709476	14.3477	6.38277	12.8357	intergenic	-
2	75730835	75731324	12.0292	5.11391	14.4126	Stop	ENSSSCG00000013478
2	75777722	75777927	1.38424	2.97715	3.28089	intron	ENSSSCG00000013482
2	75777722	75777927	1.38424	2.97715	3.28089	utr_3	ENSSSCG00000013482
2	75777722	75777927	1.38424	2.97715	3.28089	utr_3	ENSSSCG00000026169
2	75812414	75812627	6.31811	4.08631	5.33088	nc_exon	ENSSSCG00000013472
2	75893582	75893974	10.3538	4.77819	11.8232	utr_3	ENSSSCG00000013475
2	76070823	76071217	7.03318	5.3662	6.92116	utr_5	ENSSSCG00000029279
2	76088589	76088919	4.16263	4.25625	5.51178	utr_3	ENSSSCG00000029279
2	76089251	76089655	4.65694	4.17298	4.06722	utr_3	ENSSSCG00000029279
2	76408183	76408398	3.60931	2.44073	8.43947	utr_3	ENSSSCG00000013467
2	76659490	76659954	9.35504	5.73412	8.55916	utr_3	ENSSSCG00000022689
2	76677431	76677634	2.84318	2.80877	3.00684	TSS	ENSSSCG00000026784
2	76699155	76699478	5.97024	3.43694	5.39163	utr_3	ENSSSCG00000022757
2	76783171	76783453	6.08772	4.13369	7.91544	Stop	ENSSSCG00000013464
2	77007019	77007318	3.44087	2.7739	5.01515	intergenic	ENSSSCG00000013455
2	77057675	77057900	5.85661	4.22285	8.13444	CDS	ENSSSCG00000013457
2	77148896	77149140	6.70327	3.7347	6.16236	Stop	ENSSSCG00000013442
2	77150458	77150638	2.66667	3.32827	4.47394	intron	ENSSSCG00000013442
2	77151669	77152030	8.85305	5.37277	8.2429	intron	ENSSSCG00000013442
2	77157062	77157294	10.8361	5.50329	11.0406	intron	ENSSSCG00000013442
2	77161886	77162187	2.3219	3.97016	3.46959	intergenic	-
2	77163284	77163745	4.60149	6.30648	2.73713	intergenic	-
2	77164926	77165160	8.17204	3.38713	8.13444	intergenic	-
2	77165550	77165801	4.42151	3.00442	4.3528	intergenic	ENSSSCG00000025631
2	77263882	77264106	2.58649	1.68627	2.9751	Stop	ENSSSCG00000013444
2	77279469	77280037	3.6522	2.35028	3.47122	utr_3	ENSSSCG00000013445
2	77288093	77288336	4.13606	3.92618	5.85361	TSS	ENSSSCG00000013445
2	77320568	77320777	9.55775	4.04767	8.94786	utr_3	ENSSSCG00000013446
2	77491940	77492136	7.43939	4.18411	4.43328	intergenic	-
2	77511405	77511606	3.91316	3.42664	6.60439	intron	ENSSSCG00000013419
2	77565727	77565941	4.35842	3.43311	4.19842	Stop	ENSSSCG00000013414
2	77595577	77595914	3.16306	1.87883	4.78704	intron	ENSSSCG00000027779
2	77595577	77595914	3.16306	1.87883	4.78704	intron	ENSSSCG00000029635
2	77595577	77595914	3.16306	1.87883	4.78704	utr_3	ENSSSCG00000027779
2	77603812	77604002	4.78065	1.99645	4.71267	utr_5	ENSSSCG00000027779
2	77650021	77650216	6.69085	6.052	9.59302	CDS	ENSSSCG00000027565
2	77654709	77654936	5.34588	2.51274	5.11731	Stop	ENSSSCG00000027565
2	77655932	77656161	4.17325	2.19307	4.51392	Stop	ENSSSCG00000021472
2	77784348	77784564	5.49197	2.71216	6.8562	intron	ENSSSCG00000013431
2	77822723	77822941	5.0006	2.93977	5.71541	intergenic	-
2	77835398	77835645	3.4455	2.07337	4.14118	intron	ENSSSCG00000013427
2	77836816	77837153	13.4748	6.55704	15.3578	CDS	ENSSSCG00000013427
2	77891323	77891506	3.18709	3.29242	3.44517	TSS	ENSSSCG00000022265
2	77893894	77894546	6.59036	4.43539	6.2381	Stop	ENSSSCG00000022265
2	77937124	77937344	5.52586	2.55128	4.72322	intron	ENSSSCG00000023248
2	77962532	77962846	9.27527	5.03701	12.0698	TSS	ENSSSCG00000022528
2	77965960	77966166	18.8774	6.1531	11.9847	intergenic	-
2	77968097	77968369	8.75198	7.70258	16.0752	intergenic	-
2	77983021	77983398	4.5207	2.66055	6.3042	intergenic	-
2	77989485	77989668	3.826	2.44073	3.91079	CDS	ENSSSCG00000013426
2	77997888	77998257	17.5209	7.66587	11.0651	CDS	ENSSSCG00000013426
2	78143108	78144095	10.743	6.73905	10.1808	CDS	ENSSSCG00000019211
2	78143108	78144095	10.743	6.73905	10.1808	CDS	ENSSSCG00000021750
2	78150137	78150342	3.23379	1.94149	3.49449	TSS	ENSSSCG00000021750
2	78156411	78157299	4.81388	3.26582	4.18868	intergenic	ENSSSCG00000013435
2	78157561	78158055	4.7956	4.91633	5.29595	Stop	ENSSSCG00000013435
2	78165504	78165840	22.9144	10.4793	20.1862	intron	ENSSSCG00000013435
2	78333528	78333744	6.2047	2.74582	8.85026	utr_5	ENSSSCG00000013424
2	79502117	79502342	3.59571	2.88747	3.79255	Stop	ENSSSCG00000014007
2	79635155	79635472	10.7145	6.68824	16.9344	intergenic	-
2	79823464	79823665	10.0293	6.32597	9.99372	intergenic	ENSSSCG00000026972
2	80290320	80291251	8.83095	5.13018	8.48264	Stop	ENSSSCG00000014014
2	80301081	80301275	7.68172	4.60252	7.40234	intron	ENSSSCG00000014015
2	80387475	80387760	10.1036	4.4203	10.4333	Stop	ENSSSCG00000014019
2	80388056	80388333	6.06313	3.79558	6.6125	CDS	ENSSSCG00000014019
2	80588363	80588563	5.12326	3.38713	5.73111	TSS	ENSSSCG00000014023
2	80769644	80769918	7.9206	4.90958	6.76786	intron	ENSSSCG00000024043
2	81122027	81122283	17.6472	11.6806	13.4403	utr_3	ENSSSCG00000029380
2	81810285	81810591	3.74591	2.43298	3.90714	utr_5	ENSSSCG00000014031
2	81845139	81845360	9.45619	4.96863	11.272	Stop	ENSSSCG00000014033
2	81860891	81861121	4.68036	3.74826	4.71041	CDS	ENSSSCG00000014038
2	81860891	81861121	4.68036	3.74826	4.71041	intron	ENSSSCG00000014033
2	81861475	81861594	4.05575	2.24149	3.64423	CDS	ENSSSCG00000014038
2	81861475	81861594	4.05575	2.24149	3.64423	intron	ENSSSCG00000014033
2	81890680	81890885	6.21661	3.11257	5.94265	intron	ENSSSCG00000014033
2	81890680	81890885	6.21661	3.11257	5.94265	TSS	ENSSSCG00000014038
2	81922377	81922603	3.07138	1.88675	3.41058	intron	ENSSSCG00000014033
2	81922377	81922603	3.07138	1.88675	3.41058	utr_3	ENSSSCG00000014036
2	81937179	81937818	19.4535	9.41424	14.1408	intron	ENSSSCG00000014033
2	81937179	81937818	19.4535	9.41424	14.1408	utr_3	ENSSSCG00000014035
2	82031560	82031757	67.4194	12.5523	33.3512	intron	ENSSSCG00000014033
2	82031560	82031757	67.4194	12.5523	33.3512	Stop	ENSSSCG00000014034
2	82212763	82213001	7.28478	7.59339	7.32101	CDS	ENSSSCG00000014044
2	82213262	82214177	7.58941	5.33237	5.40832	CDS	ENSSSCG00000014044
2	82220191	82220378	8.24634	5.23013	6.98605	Stop	ENSSSCG00000014043
2	82221887	82222155	3.16575	2.20026	3.37097	utr_5	ENSSSCG00000014043
2	82227936	82228198	4.92224	3.90658	8.18373	Stop	ENSSSCG00000014041
2	82231451	82231697	4.55914	2.57148	5.65344	utr_5	ENSSSCG00000014041
2	82380477	82380681	89.484	21.9666	44.5361	CDS	ENSSSCG00000014045
2	82869290	82869454	2.75806	1.89834	4.50784	intron	ENSSSCG00000014051
2	83003655	83003849	9.96464	5.4326	9.1632	utr_3	ENSSSCG00000014057
2	83006419	83006670	6.93385	4.4456	6.84128	Stop	ENSSSCG00000014057
2	83015748	83015950	3.42015	3.8019	4.70319	CDS	ENSSSCG00000014057
2	83066605	83066934	3.20438	2.33994	2.97471	CDS	ENSSSCG00000014058
2	83150160	83150403	9.55284	3.58185	13.9721	utr_3	ENSSSCG00000029985
2	83150640	83150825	6.18011	6.46634	5.74834	utr_3	ENSSSCG00000029985
2	83156744	83156965	5.63871	6.04371	13.4218	intron	ENSSSCG00000029985
2	83999234	83999621	7.83621	6.0099	8.2855	CDS	ENSSSCG00000014066
2	84211974	84212189	19.4872	10.7591	26.8436	Stop	ENSSSCG00000014068
2	84269472	84269688	34.3227	14.5281	10.2189	intron	ENSSSCG00000014071
2	85278298	85278487	21.3641	6.27616	18.2444	Stop	ENSSSCG00000014072
2	86174014	86174445	3.16404	2.00488	2.6608	utr_5	ENSSSCG00000014082
2	86916833	86917259	7.83331	4.80594	9.87356	utr_5	ENSSSCG00000014087
2	87280829	87281244	15.3264	5.87337	14.3814	utr_3	ENSSSCG00000020672
2	87283221	87283487	18.6372	8.94103	15.2965	CDS	ENSSSCG00000020672
2	87564821	87565285	10.6237	5.41048	9.10178	intergenic	-
2	87565860	87566047	3.03898	2.1524	2.66629	TSS	ENSSSCG00000014095
2	88972515	88972709	11.1921	6.0958	9.98318	utr_3	ENSSSCG00000028536
2	89746581	89747027	8.05097	4.61202	9.1377	intergenic	-
2	89814592	89814800	4.99403	5.46258	7.76469	intergenic	-
2	90084385	90084578	8.71685	5.04554	10.8876	intergenic	-
2	90084699	90085436	6.56488	4.60736	6.54551	intergenic	-
2	93894203	93894427	11.0322	12.5523	19.421	utr_3	ENSSSCG00000014136
2	95696587	95696819	2.90665	2.9583	2.93547	Stop	ENSSSCG00000014141
2	97400264	97400842	14.677	7.63085	13.3501	TSS	ENSSSCG00000014146
2	100771048	100771292	8.68961	3.04633	8.68642	CDS	ENSSSCG00000024193
2	101571418	101571962	20.9485	7.996	19.1216	utr_3	ENSSSCG00000014156
2	103838402	103838764	5.13204	2.90285	6.90828	intergenic	-
2	103838963	103839570	4.57279	3.39958	5.0004	CDS	ENSSSCG00000014157
2	103847945	103848527	23.3343	9.75167	23.2595	Stop	ENSSSCG00000014157
2	106277669	106277876	10.6237	4.03467	7.18543	intergenic	-
2	106416441	106416643	3.55095	1.29377	3.14696	CDS	ENSSSCG00000014168
2	106474995	106475258	7.25268	3.51845	7.73461	TSS	ENSSSCG00000014168
2	107362956	107363156	13.5111	7.32218	11.1623	utr_3	ENSSSCG00000027860
2	107641421	107641659	5.35722	3.04299	6.769	CDS	ENSSSCG00000014175
2	108921206	108921432	35.7754	18.596	41.1807	CDS	ENSSSCG00000014176
2	108970518	108970718	5.02895	4.74735	9.92399	Stop	ENSSSCG00000014177
2	110536922	110537154	3.16088	2.35831	4.51381	CDS	ENSSSCG00000014179
2	110737486	110737714	48.5418	9.72804	30.5041	Stop	ENSSSCG00000014180
2	112821608	112821820	6.34308	11.9247	8.82274	CDS	ENSSSCG00000024089
2	119133730	119134402	5.89556	3.30367	5.04136	utr_5	ENSSSCG00000014195
2	120041380	120041636	7.61167	3.24536	9.64082	Stop	ENSSSCG00000014197
2	121358571	121358771	64.559	8.89122	17.0823	intergenic	-
2	121578944	121579296	8.80537	4.40972	9.43208	nc_exon	ENSSSCG00000024866
2	123612383	123612482	2.10801	1.00501	1.6185	Stop	ENSSSCG00000014213
2	124204391	124204608	9.0301	7.19143	7.4066	Stop	ENSSSCG00000014215
2	124598803	124598990	5.49059	7.29726	3.82913	intergenic	-
2	124599832	124600412	6.6483	6.26751	4.18531	intergenic	-
2	124611184	124611694	22.5376	12.8916	27.8469	Stop	ENSSSCG00000014216
2	124628842	124629336	37.7513	17.6097	28.4022	Stop	ENSSSCG00000014217
2	124629494	124630167	22.3021	12.6535	19.1748	CDS	ENSSSCG00000014217
2	124851310	124851506	5.72042	4.91631	5.05193	TSS	ENSSSCG00000014220
2	125468575	125469652	9.55749	6.36283	9.58666	CDS	ENSSSCG00000014224
2	128460875	128461063	15.4101	3.83543	13.9189	CDS	ENSSSCG00000027857
2	128722479	128722759	23.9032	6.01466	17.2259	Stop	ENSSSCG00000014227
2	129849208	129849535	10.4704	3.75716	8.76196	CDS	ENSSSCG00000014229
2	130900097	130900296	7.55917	3.47281	7.26677	utr_5	ENSSSCG00000014232
2	130984338	130984538	13.5422	3.66109	95.9864	CDS	ENSSSCG00000014233
2	131666837	131666998	4.07241	4.2887	3.91375	utr_3	ENSSSCG00000025977
2	131667496	131667709	4.37314	2.06489	6.37995	utr_3	ENSSSCG00000025977
2	132183932	132184144	10.5828	3.84788	7.01597	Stop	ENSSSCG00000014239
2	133297347	133297567	18.1419	10.3557	36.1169	CDS	ENSSSCG00000014242
2	133299138	133299292	10.828	10.012	11.0832	CDS	ENSSSCG00000014242
2	135014243	135014442	3.61057	1.98437	3.50279	CDS	ENSSSCG00000014244
2	135853860	135854165	5.61147	2.97463	5.4338	Stop	ENSSSCG00000014252
2	137112815	137113198	5.33906	3.18563	5.4438	utr_5	ENSSSCG00000014257
2	139034625	139034827	7.10339	5.03995	11.1171	CDS	ENSSSCG00000014267
2	139885716	139885939	5.91498	3.57851	5.76189	TSS	ENSSSCG00000020915
2	140218473	140218718	7.84004	2.74059	6.37197	intergenic	-
2	140230382	140230625	7.02608	3.42636	6.18217	Stop	ENSSSCG00000014277
2	140267443	140267669	18.3226	8.05439	30.4671	intergenic	-
2	140572807	140573006	4.6223	2.5768	5.1199	intergenic	-
2	140618901	140619199	11.1174	6.15728	14.9757	CDS	ENSSSCG00000014287
2	140620174	140620546	5.01324	3.61355	6.58151	CDS	ENSSSCG00000014287
2	140620754	140620978	5.40469	3.08444	5.29507	CDS	ENSSSCG00000014287
2	140650069	140650444	12.0509	5.93911	9.32331	CDS	ENSSSCG00000014288
2	140650574	140650911	11.3224	8.43162	14.0997	CDS	ENSSSCG00000014288
2	140654317	140654801	5.60142	5.38197	4.40754	intergenic	-
2	140664347	140664574	4.25427	3.04511	4.30289	intergenic	-
2	140768254	140768528	7.63774	2.63001	7.89341	CDS	ENSSSCG00000014291
2	140803979	140804191	6.24343	3.9749	4.22111	TSS	ENSSSCG00000014291
2	141864728	141865010	6.2973	4.03766	6.32388	CDS	ENSSSCG00000014295
2	142441730	142442384	13.4644	8.32462	12.1366	CDS	ENSSSCG00000014303
2	142444122	142444445	37.1147	9.07499	25.4879	utr_3	ENSSSCG00000014303
2	142510482	142510694	5.23849	2.35356	5.24865	CDS	ENSSSCG00000014304
2	142575703	142575961	5.53541	4.4115	7.14243	CDS	ENSSSCG00000014306
2	142660906	142661326	9.93218	4.67472	8.22778	CDS	ENSSSCG00000030393
2	142662964	142663220	21.7521	8.42973	20.4003	intergenic	-
2	142676796	142676979	6.72992	3.88042	7.77853	utr_5	ENSSSCG00000026106
2	142687307	142687657	5.47083	4.84646	5.86954	CDS	ENSSSCG00000026106
2	142694741	142695133	6.77045	3.28138	4.59923	Stop	ENSSSCG00000026106
2	142698899	142699221	6.37142	3.31804	6.06596	intergenic	-
2	145356315	145356645	6.34697	3.9226	7.60256	intergenic	-
2	145357101	145357343	5.03226	3.13808	4.6999	intergenic	-
2	145357634	145357834	17.2839	8.69008	23.4021	utr_3	ENSSSCG00000014321
2	145502808	145504025	6.51263	3.75523	6.09066	CDS	ENSSSCG00000014322
2	145887712	145887947	6.87815	3.18077	6.76639	CDS	ENSSSCG00000014327
2	146045579	146045776	6.48315	3.25877	6.79465	CDS	ENSSSCG00000014331
2	146082154	146082342	4.6853	3.62086	3.32451	CDS	ENSSSCG00000014331
2	146087199	146087508	7.31767	3.26487	9.45632	CDS	ENSSSCG00000014331
2	146158555	146158892	13.092	6.61408	13.0997	Stop	ENSSSCG00000014336
2	146218916	146219100	7.28948	2.45695	5.71955	intron	ENSSSCG00000014337
2	146629763	146630047	10.3878	5.9209	12.7891	intergenic	-
2	147113484	147113760	13.5422	4.26457	16.9196	CDS	ENSSSCG00000014347
2	147195774	147196028	31.1166	12.222	19.1529	intergenic	-
2	147228793	147229072	3.64285	1.53326	3.65346	intergenic	-
2	147318099	147318621	3.49289	2.55801	3.79809	CDS	ENSSSCG00000014357
2	147318810	147318995	4.47687	2.85845	5.05861	Stop	ENSSSCG00000014357
2	147320264	147320485	3.42597	1.15697	3.25378	intron	ENSSSCG00000014357
2	147320778	147320992	8.49892	3.90347	6.67261	utr_3	ENSSSCG00000014357
2	147405171	147405463	5.62614	3.06079	6.15579	intergenic	-
2	147800801	147801333	9.22713	5.24193	10.3677	TSS	ENSSSCG00000021989
2	147801926	147802238	8.14481	3.01503	9.73329	intergenic	ENSSSCG00000021989
2	148109881	148110209	9.18802	4.06408	7.02038	TSS	ENSSSCG00000014364
2	148231523	148231773	9.71032	3.17993	8.57092	CDS	ENSSSCG00000014364
2	148264176	148264412	18.285	8.62972	11.6593	intergenic	ENSSSCG00000014366
2	148266998	148267675	6.9304	3.68046	5.56137	TSS	ENSSSCG00000014367
2	148315286	148315629	4.74434	4.47539	7.58417	CDS	ENSSSCG00000014372
2	148328253	148328635	10.4936	6.34957	5.96032	Stop	ENSSSCG00000014372
2	148331921	148332127	6.86842	3.61355	6.68439	Stop	ENSSSCG00000014375
2	148353706	148353906	6.47927	3.08444	7.17117	intergenic	-
2	149149811	149150163	8.31998	4.43373	6.13726	Stop	ENSSSCG00000028168
2	149150867	149151295	18.5856	8.81869	15.75	intergenic	ENSSSCG00000028168
2	149334777	149335001	5.08088	5.18465	6.60325	intergenic	-
2	149335469	149335699	2.21813	3.30544	3.93165	intergenic	-
2	149473442	149473702	11.7961	5.24817	14.0319	TSS	ENSSSCG00000014387
2	149507131	149507323	4.20709	1.7859	4.5678	Stop	ENSSSCG00000014391
2	149680323	149680511	7.21864	6.8394	21.963	intergenic	-
2	149682515	149682877	5.50252	2.66522	3.85804	intergenic	-
2	149690594	149690931	2.39109	2.19518	2.87833	Stop	ENSSSCG00000022289
2	149691852	149692088	2.57419	4.21897	3.78672	CDS	ENSSSCG00000022289
2	149692305	149692925	6.53764	5.63636	7.95855	CDS	ENSSSCG00000022289
2	149695884	149696113	20.9263	10.6695	17.4891	CDS	ENSSSCG00000022289
2	149752410	149752926	18.7446	12.1824	17.3744	Stop	ENSSSCG00000014395
2	149762862	149763062	4.6611	3.7109	5.7592	CDS	ENSSSCG00000014395
2	149764074	149764272	9.98805	3.28236	5.39585	CDS	ENSSSCG00000014395
2	149764919	149765270	14.6794	12.8235	12.3644	CDS	ENSSSCG00000014395
2	149776577	149776807	2.47742	1.12027	1.88768	intron	ENSSSCG00000014394
2	150063032	150063218	8.53527	6.88634	6.67883	intergenic	-
2	150065409	150066235	7.54653	5.99249	6.87891	intergenic	ENSSSCG00000014397
2	150066502	150066718	3.36496	2.64122	5.28741	CDS	ENSSSCG00000014397
2	151154923	151155261	8.30601	7.07701	7.62431	CDS	ENSSSCG00000014401
2	151155471	151155825	14.3984	8.60961	8.35379	CDS	ENSSSCG00000014401
2	151158338	151158542	5.78853	15.8398	8.50419	TSS	ENSSSCG00000014401
2	156394120	156394739	14.1723	8.60304	12.6183	CDS	ENSSSCG00000014427
2	157186152	157186277	3.84087	2.06715	4.18626	intergenic	-
2	157272726	157272928	17.3948	7.50678	4.7112	Stop	ENSSSCG00000014431
2	157282644	157282876	12.4215	3.60982	12.1754	Stop	ENSSSCG00000014432
2	157303759	157304392	6.65115	7.58371	7.10407	intergenic	-
2	157304799	157305056	5.33586	5.06497	6.20251	intergenic	-
2	157307171	157307390	6.64659	4.84976	10.5748	Stop	ENSSSCG00000014434
2	157347048	157347343	13.729	12.3199	16.879	intergenic	-
2	157380531	157380735	7.34773	3.85867	6.96433	intergenic	-
2	157380874	157381212	5.80891	2.99473	4.94037	intergenic	-
2	157428079	157428300	4.44655	2.52546	4.73404	utr_5	ENSSSCG00000014435
2	157502344	157502685	4.90322	5.63245	4.00696	intergenic	-
2	157503018	157503219	9.95968	6.51755	5.66155	intergenic	-
2	157810601	157810817	3.84767	2.38061	3.22754	CDS	ENSSSCG00000014440
2	157909530	157909704	2.81644	2.54625	2.78705	utr_3	ENSSSCG00000031039
2	158113572	158113781	6.53765	6.97351	9.25291	utr_3	ENSSSCG00000022741
2	158114165	158114385	10.9414	4.52643	8.47043	utr_3	ENSSSCG00000022741
2	158453451	158453787	10.1492	7.96141	12.3581	CDS	ENSSSCG00000014450
2	159692568	159692847	21.0021	6.70408	12.405	CDS	ENSSSCG00000014539
2	159733837	159734152	4.85653	4.2595	5.37058	intergenic	-
2	159751467	159752143	10.2469	7.31408	9.34298	CDS	ENSSSCG00000014538
2	162096843	162097051	5.0698	2.72877	6.50168	utr_3	ENSSSCG00000014565
2	162185823	162186160	14.4373	6.39357	10.2556	utr_3	ENSSSCG00000014558
2	162191510	162191698	3.16337	1.93515	4.06724	CDS	ENSSSCG00000014557
2	162334741	162334979	3.73578	1.80767	4.76716	intergenic	-
3	87222	87456	12.481	7.08973	10.629	intergenic	-
3	93438	94094	7.40292	5.414	6.80404	intergenic	-
3	120413	120919	8.99893	4.9196	9.00301	intergenic	ENSSSCG00000020813
3	121070	121373	5.96338	4.39566	7.04633	intergenic	-
3	152554	152777	18.9125	7.62102	20.9752	intergenic	-
3	191662	191926	12.1838	3.5688	9.21903	Stop	ENSSSCG00000007542
3	333630	333826	3.46654	1.9895	2.93048	intergenic	-
3	729059	729274	5.11828	3.4627	5.49075	intron	ENSSSCG00000007546
3	730434	730735	3.18368	3.36769	3.10315	intron	ENSSSCG00000007546
3	732051	732328	10.1362	6.18712	9.14265	intron	ENSSSCG00000007546
3	733101	733308	16.4926	5.14296	8.7155	intron	ENSSSCG00000007546
3	733933	734408	5.32593	3.32583	4.04522	intron	ENSSSCG00000007546
3	734761	734981	6.65438	5.02093	6.91427	intron	ENSSSCG00000007546
3	742508	742719	3.51462	2.58381	4.23832	Stop	ENSSSCG00000007546
3	762437	763011	5.70206	3.81018	5.70326	intergenic	ENSSSCG00000007550
3	763335	763601	4.06049	4.54619	4.88065	intergenic	-
3	764247	764501	6.89516	5.1686	6.86908	intergenic	-
3	800382	800724	1.91948	3.21854	2.49579	intergenic	-
3	809468	810057	4.12704	4.58878	4.13021	Stop	ENSSSCG00000007551
3	810321	810709	9.30323	6.46453	8.71786	intergenic	-
3	810921	811632	10.9061	6.70445	9.99748	intergenic	-
3	873778	873989	3.02365	2.07268	4.26644	utr_3	ENSSSCG00000007554
3	1138012	1138226	7.63576	3.45993	6.79131	intergenic	-
3	1147160	1147660	2.95034	2.99461	2.83792	Stop	ENSSSCG00000007559
3	1147952	1148994	8.96289	4.08843	8.07727	intergenic	-
3	1149661	1149885	3.58128	3.75795	4.30647	intergenic	-
3	1150133	1150387	11.8866	7.78708	14.5681	intergenic	-
3	1150947	1151194	2.52166	4.25625	5.38422	intergenic	-
3	1151624	1151867	4.43625	5.07516	6.4597	intergenic	-
3	1151999	1152706	27.4713	14.9561	24.0853	intergenic	ENSSSCG00000007560
3	1997781	1998055	87.441	141.214	36.4016	intron	ENSSSCG00000023433
3	2018219	2018654	6.41614	3.10028	6.96627	Stop	ENSSSCG00000023433
3	2019275	2019553	8.97687	3.22984	6.48315	utr_3	ENSSSCG00000023433
3	2019828	2020296	5.02815	2.57738	4.49812	utr_3	ENSSSCG00000023433
3	2110311	2110560	13.9469	7.26065	11.9146	Stop	ENSSSCG00000007563
3	2110732	2110937	7.41321	3.41335	6.10083	CDS	ENSSSCG00000007563
3	2173740	2173971	5.10254	1.92622	4.60535	intergenic	ENSSSCG00000007565
3	2198186	2198522	12.5162	5.34928	12.7904	intergenic	-
3	2285261	2285574	10.7097	10.53	50.2709	Stop	ENSSSCG00000007567
3	4263705	4264556	11.9467	4.79979	10.9621	intergenic	ENSSSCG00000007576
3	4266072	4266336	4.08602	3.44317	5.46169	intergenic	-
3	4289482	4289702	3.42342	2.45816	2.72254	Stop	ENSSSCG00000007577
3	4517328	4517724	14.903	6.93715	13.6879	Stop	ENSSSCG00000007580
3	4570001	4570741	8.1403	4.30643	6.75091	CDS	ENSSSCG00000022553
3	4594511	4595137	8.76322	4.51924	5.85466	intron	ENSSSCG00000022553
3	4608813	4608937	14.9651	5.03399	13.5187	intron	ENSSSCG00000022553
3	4614060	4614404	13.3724	6.70232	11.0739	intergenic	-
3	4636465	4636790	5.35268	3.13809	3.54829	intergenic	ENSSSCG00000007583
3	4638762	4639023	36.9376	9.55068	19.697	intergenic	-
3	4690437	4690673	20.1578	6.50031	15.6033	intergenic	-
3	5136790	5137007	5.72042	4.55022	9.45145	TSS	ENSSSCG00000028354
3	5169900	5170162	9.35244	3.25695	6.2816	utr_3	ENSSSCG00000024245
3	5170418	5170630	2.20979	1.26578	2.67796	utr_3	ENSSSCG00000024245
3	5170986	5171176	4.2086	3.75619	2.93889	CDS	ENSSSCG00000024245
3	5289220	5289421	7.31767	2.39379	7.83863	TSS	ENSSSCG00000025940
3	5455164	5455471	9.84947	6.4126	8.44433	CDS	ENSSSCG00000007599
3	5455164	5455471	9.84947	6.4126	8.44433	intron	ENSSSCG00000007602
3	5455832	5456410	10.7015	5.49531	9.13827	CDS	ENSSSCG00000007599
3	5455832	5456410	10.7015	5.49531	9.13827	intron	ENSSSCG00000007602
3	5456723	5456959	3.8	6.97351	4.57078	CDS	ENSSSCG00000007599
3	5456723	5456959	3.8	6.97351	4.57078	intron	ENSSSCG00000007602
3	5464942	5465258	10.4946	6.86893	11.9693	intron	ENSSSCG00000007602
3	5464942	5465258	10.4946	6.86893	11.9693	Stop	ENSSSCG00000007599
3	5470598	5470807	11.9078	17.7824	14.2934	intron	ENSSSCG00000007600
3	5470598	5470807	11.9078	17.7824	14.2934	intron	ENSSSCG00000007602
3	5470598	5470807	11.9078	17.7824	14.2934	TSS	ENSSSCG00000007600
3	6086930	6087425	6.1874	3.24902	4.67428	Stop	ENSSSCG00000007606
3	6096716	6097083	12.0472	4.59431	9.28517	utr_3	ENSSSCG00000030153
3	6097778	6098018	17.9104	10.5911	19.2515	utr_3	ENSSSCG00000030153
3	6534928	6535229	4.94214	2.27884	3.77438	CDS	ENSSSCG00000007617
3	6535777	6536062	8.98926	4.12071	8.70383	CDS	ENSSSCG00000007617
3	6581309	6582136	10.7184	5.78517	8.97112	CDS	ENSSSCG00000007618
3	6589762	6589991	20.8387	23.7099	16.7264	intron	ENSSSCG00000007618
3	6589762	6589991	20.8387	23.7099	16.7264	utr_3	ENSSSCG00000022023
3	6616289	6616511	5.93548	2.4313	4.9194	intron	ENSSSCG00000007618
3	6622525	6622719	3.94302	2.81431	3.41647	intron	ENSSSCG00000007618
3	6623446	6623635	2.84703	2.24149	2.51428	Stop	ENSSSCG00000007618
3	6688943	6689199	5.50725	8.36819	6.8004	CDS	ENSSSCG00000007622
3	6693110	6693412	8.47471	3.92793	6.38794	Stop	ENSSSCG00000007622
3	6710469	6710687	3.77605	2.18592	5.99539	utr_3	ENSSSCG00000023257
3	6712299	6712502	2.24997	2.24588	2.52622	utr_3	ENSSSCG00000023257
3	7075247	7075533	12.0765	11.1576	24.2406	intergenic	-
3	7093442	7093640	10.5419	5.1604	10.8459	CDS	ENSSSCG00000007637
3	7189999	7190234	3.48674	4.08903	3.99097	CDS	ENSSSCG00000007643
3	7191692	7192004	22.2104	9.95218	28.2937	intergenic	-
3	7192514	7192823	7.07467	6.44427	4.63965	intergenic	-
3	7193058	7193347	18.9591	6.07501	8.98323	intergenic	-
3	7193666	7194271	15.7539	7.78956	7.99887	intergenic	-
3	7359672	7359865	2.08529	1.17359	2.06072	intergenic	ENSSSCG00000007647
3	7359973	7360210	4.05197	2.74229	6.29536	CDS	ENSSSCG00000007647
3	7430915	7431111	2.6648	1.23337	3.20448	intergenic	ENSSSCG00000007644
3	7700122	7700831	9.36867	6.58274	10.8179	intron	ENSSSCG00000025164
3	7700122	7700831	9.36867	6.58274	10.8179	intron	ENSSSCG00000025958
3	7748773	7749264	7.46051	3.97489	6.86972	utr_5	ENSSSCG00000025164
3	7811329	7811721	8.95472	4.23716	9.33123	CDS	ENSSSCG00000007664
3	7841970	7842170	10.3265	6.8394	24.0548	intergenic	-
3	7842425	7842714	4.56567	3.15821	6.00513	intergenic	-
3	7907437	7907642	11.378	5.00598	11.0396	intergenic	-
3	7947659	7947960	6.7099	3.59172	8.17872	intron	ENSSSCG00000007671
3	8003024	8003690	9.48521	4.4709	9.37776	Stop	ENSSSCG00000007672
3	8116371	8116597	4.39009	2.24588	4.06723	TSS	ENSSSCG00000007675
3	8138756	8139320	7.52994	3.8926	6.58151	CDS	ENSSSCG00000023619
3	8153534	8153802	5.56018	4.93725	7.82454	CDS	ENSSSCG00000024789
3	8158659	8159015	13.0753	7.91059	10.6561	intergenic	-
3	9399966	9400153	11.9857	6.97351	13.1168	CDS	ENSSSCG00000007681
3	9467020	9467240	5.99284	3.75339	6.95494	CDS	ENSSSCG00000007682
3	9505525	9506265	15.6801	6.35787	10.9656	CDS	ENSSSCG00000021013
3	9547703	9547890	2.05349	1.92564	3.22365	Stop	ENSSSCG00000007684
3	9620772	9621048	3.00321	2.09205	3.11232	Stop	ENSSSCG00000024397
3	9784740	9784930	1.9709	1.38659	2.02262	CDS	ENSSSCG00000025430
3	9908085	9908312	3.39845	3.05536	1.99533	Stop	ENSSSCG00000007692
3	10280286	10280514	5.68899	4.06788	9.88976	utr_3	ENSSSCG00000007700
3	10461735	10461937	5.6849	3.17544	5.45747	utr_3	ENSSSCG00000027342
3	10462406	10462816	4.2049	4.03765	4.39862	Stop	ENSSSCG00000027342
3	10587059	10587524	4.70838	3.64694	4.58437	Stop	ENSSSCG00000007709
3	10598438	10598645	3.36311	2.42189	4.20609	utr_3	ENSSSCG00000007710
3	10600798	10601028	2.74635	1.69091	2.42563	intron	ENSSSCG00000007710
3	10655267	10655516	4.79846	4.00977	4.88067	Stop	ENSSSCG00000007712
3	10715297	10715615	5.90416	3.47992	6.12133	intergenic	-
3	10777088	10777839	11.7158	7.2047	9.98754	utr_3	ENSSSCG00000007718
3	10778280	10778595	2.48893	3.46811	2.18087	utr_5	ENSSSCG00000007718
3	11155433	11155707	4.8254	5.38704	10.4392	CDS	ENSSSCG00000007719
3	11634990	11635266	5.12712	4.93674	6.8773	CDS	ENSSSCG00000007723
3	11667741	11668123	2.53974	2.10131	2.6704	utr_3	ENSSSCG00000007723
3	14851241	14851681	9.27842	3.62503	8.64164	intergenic	-
3	14916993	14917207	3.11167	2.52677	3.16751	CDS	ENSSSCG00000007727
3	14943133	14944418	11.5087	5.72045	8.58755	CDS	ENSSSCG00000007727
3	16505467	16505748	3.7054	2.47947	4.63121	utr_3	ENSSSCG00000007736
3	16562421	16562725	12.4671	5.23013	14.7062	Stop	ENSSSCG00000007735
3	16739205	16739367	4.38245	1.7677	6.02733	CDS	ENSSSCG00000007737
3	16770792	16771051	3.67092	3.12211	5.7116	intergenic	-
3	16890259	16890618	2.5197	2.4054	2.58782	intergenic	ENSSSCG00000007738
3	16894660	16894873	4.68322	3.05762	6.57262	intron	ENSSSCG00000007738
3	16945068	16945256	2.85429	1.71596	2.69515	Stop	ENSSSCG00000028513
3	17016499	17016863	4.79808	2.81505	4.74324	TSS	ENSSSCG00000028513
3	17127487	17127656	5.61828	1.66413	5.19555	intergenic	-
3	17362708	17362963	14.3594	6.05201	16.1672	Stop	ENSSSCG00000025245
3	17549635	17550015	11.4727	7.00838	22.1553	CDS	ENSSSCG00000030798
3	17555642	17555981	11.7181	7.60049	23.2645	CDS	ENSSSCG00000030798
3	17556639	17556900	14.8264	10.3856	31.6663	Stop	ENSSSCG00000030798
3	17732459	17732704	24.6328	8.52914	19.2515	CDS	ENSSSCG00000026817
3	17734334	17734545	14.7097	5.12553	15.4554	CDS	ENSSSCG00000026817
3	17761516	17761767	6.28404	2.898	4.93613	utr_5	ENSSSCG00000007768
3	17785684	17785934	7.91667	6.51755	10.9502	intergenic	-
3	17805383	17805624	5.76583	3.09449	9.91389	Stop	ENSSSCG00000028186
3	17806068	17806373	14.3011	6.56672	11.6787	utr_3	ENSSSCG00000028186
3	17823268	17823471	6.30415	3.20781	4.17332	CDS	ENSSSCG00000007782
3	17835961	17836506	5.25346	3.07371	5.76191	CDS	ENSSSCG00000007782
3	17953388	17953675	3.99523	2.61867	3.57472	utr_5	ENSSSCG00000007776
3	17953388	17953675	3.99523	2.61867	3.57472	utr_5	ENSSSCG00000020178
3	18059592	18059875	19.2451	10.0419	27.8963	CDS	ENSSSCG00000007780
3	18063342	18063887	22.458	7.71967	15.4328	utr_3	ENSSSCG00000007780
3	18087511	18087695	4.06507	3.93798	3.51814	Stop	ENSSSCG00000007788
3	18111540	18111769	2.65137	2.98118	3.81477	CDS	ENSSSCG00000007789
3	18111946	18112400	7.66538	4.60251	8.48059	CDS	ENSSSCG00000007789
3	18113231	18113488	9.39783	6.40692	12.5907	CDS	ENSSSCG00000007789
3	18126761	18127104	5.60027	3.15782	4.47393	CDS	ENSSSCG00000007789
3	18156573	18156793	1.68111	2.05258	1.79814	intron	ENSSSCG00000007789
3	18188618	18188813	2.89736	2.90926	4.24517	Stop	ENSSSCG00000025794
3	18188986	18189251	3.32331	1.68159	3.67555	CDS	ENSSSCG00000025794
3	18199396	18200005	17.6358	9.74706	14.0093	intergenic	-
3	18226366	18226629	7.77295	5.27466	10.1274	CDS	ENSSSCG00000007785
3	18227217	18227419	4.57634	2.26639	2.80769	intergenic	ENSSSCG00000007785
3	18241355	18241710	7.46143	6.14357	6.92498	intergenic	-
3	18242137	18242305	2.16982	2.47243	3.08431	intergenic	-
3	18250810	18251863	7.18969	4.96968	6.51133	CDS	ENSSSCG00000007794
3	18298379	18298607	16.2675	7.67086	11.748	Stop	ENSSSCG00000007797
3	18303276	18303920	10.8961	6.16796	12.4222	Stop	ENSSSCG00000023349
3	18304919	18305321	4.24792	3.09754	3.16211	CDS	ENSSSCG00000023349
3	18305618	18306175	10.2099	6.50577	10.8515	utr_5	ENSSSCG00000023349
3	18323486	18324224	5.04873	4.19454	4.08631	intergenic	ENSSSCG00000007795
3	18324732	18325113	2.97926	3.5993	2.95545	CDS	ENSSSCG00000007795
3	18361453	18361650	8.61779	4.40432	8.19254	CDS	ENSSSCG00000007801
3	18383371	18383750	3.58858	2.49533	3.64543	utr_5	ENSSSCG00000007798
3	18384042	18384542	11.8665	6.10421	11.4803	CDS	ENSSSCG00000007798
3	18393541	18393979	5.80645	4.88146	5.85109	Stop	ENSSSCG00000007798
3	18398223	18398510	4.09411	3.34103	4.20772	CDS	ENSSSCG00000007791
3	18398914	18399209	4.76862	2.8211	4.58954	Stop	ENSSSCG00000007791
3	18502138	18502381	3.13674	2.21029	3.97152	utr_3	ENSSSCG00000027629
3	18515084	18515313	2.26677	2.27326	3.14973	CDS	ENSSSCG00000027946
3	18516891	18517174	3.21045	2.32355	3.77347	CDS	ENSSSCG00000027946
3	18534439	18534642	2.71563	2.47104	3.23975	Stop	ENSSSCG00000022996
3	18537427	18538141	7.58833	4.63105	6.83108	TSS	ENSSSCG00000022996
3	18544635	18544914	4.77702	2.69447	5.64368	Stop	ENSSSCG00000025321
3	18547175	18547524	3.40435	2.32782	3.73075	CDS	ENSSSCG00000025321
3	18547728	18548405	4.73104	2.32884	5.02107	intron	ENSSSCG00000025321
3	18589234	18589457	8.03192	2.75109	6.77875	intergenic	-
3	18591195	18591423	10.4674	6.14666	16.6756	CDS	ENSSSCG00000027454
3	18609562	18609808	18.0746	9.44911	13.2675	utr_3	ENSSSCG00000023772
3	18610214	18610429	5.72043	10.0799	14.4386	Stop	ENSSSCG00000023772
3	18610868	18611067	5.99283	3.7192	6.04273	CDS	ENSSSCG00000023772
3	18721458	18721948	17.6174	9.11249	16.3197	CDS	ENSSSCG00000007804
3	18727725	18728001	6.63978	3.51581	9.45142	Stop	ENSSSCG00000007804
3	19058711	19058923	5.62136	1.9117	5.88003	CDS	ENSSSCG00000007812
3	19111834	19112203	2.90204	1.78258	3.43311	intergenic	ENSSSCG00000007812
3	19682269	19682468	41.2687	17.4836	34.4357	Stop	ENSSSCG00000007816
3	19846693	19847435	12.1037	6.42442	10.9774	intergenic	ENSSSCG00000007817
3	19847735	19848728	6.03001	5.47668	5.27335	CDS	ENSSSCG00000007817
3	22570193	22571099	18.7384	12.8926	17.3522	intergenic	-
3	23541589	23541813	28.9289	11.6806	10.5167	CDS	ENSSSCG00000030424
3	24288297	24288681	20.0006	8.96095	13.4865	utr_3	ENSSSCG00000007839
3	24335353	24335576	11.4838	4.07101	10.4892	intron	ENSSSCG00000007839
3	24335353	24335576	11.4838	4.07101	10.4892	Stop	ENSSSCG00000007840
3	24342031	24342309	12.7178	7.52144	13.3201	CDS	ENSSSCG00000007840
3	24342031	24342309	12.7178	7.52144	13.3201	intron	ENSSSCG00000007839
3	25968402	25968741	9.23138	8.32464	6.59549	CDS	ENSSSCG00000007854
3	25970698	25971192	14.9432	14.2957	13.1453	Stop	ENSSSCG00000007854
3	26077819	26078226	13.1073	4.68139	12.1704	utr_3	ENSSSCG00000024748
3	26138371	26138477	5.53139	3.62723	4.53577	Stop	ENSSSCG00000007858
3	26171983	26172193	13.552	3.9008	14.8115	intergenic	-
3	26256433	26256634	4.19645	3.90779	8.64662	CDS	ENSSSCG00000026453
3	26735167	26735393	9.99876	5.46786	7.79192	utr_3	ENSSSCG00000007864
3	26750282	26750785	12.6567	8.09533	12.7977	CDS	ENSSSCG00000007864
3	26922021	26922215	7.78122	3.38713	7.13329	Stop	ENSSSCG00000029212
3	29067651	29067873	8.05968	3.96953	6.59895	intergenic	-
3	29072450	29072713	3.57858	3.64373	4.6115	CDS	ENSSSCG00000007874
3	29646582	29646815	1.95821	2.19817	2.44033	intron	ENSSSCG00000007878
3	29976916	29977117	50.6667	10.8338	38.0691	intergenic	-
3	30289070	30289364	40.043	15.272	13.0151	utr_3	ENSSSCG00000007881
3	32030544	32030822	3.64559	2.27756	3.67857	intergenic	-
3	32129743	32129973	9.42508	6.16408	10.0626	intron	ENSSSCG00000007888
3	32134368	32134561	5.92473	4.41656	5.37777	intergenic	-
3	32449531	32449724	2.86022	2.87327	3.4948	Stop	ENSSSCG00000028743
3	32599321	32599525	13.1234	5.63692	17.7215	utr_3	ENSSSCG00000022149
3	32604473	32604684	13.6503	6.8843	18.7092	TSS	ENSSSCG00000022149
3	33141783	33142007	7.86561	8.44293	15.8169	CDS	ENSSSCG00000007901
3	33142580	33142923	9.02479	9.55689	13.1168	CDS	ENSSSCG00000007901
3	33293474	33293688	5.6849	2.07232	4.99159	intergenic	-
3	33294176	33294388	20.6187	5.40447	34.1647	intergenic	-
3	34446987	34447621	9.19837	6.63662	9.8721	intergenic	ENSSSCG00000028454
3	34622773	34623590	7.65261	5.47399	5.10929	Stop	ENSSSCG00000021288
3	34638589	34638812	19.0841	6.37125	16.697	intergenic	-
3	34686446	34686671	5.41172	2.53138	4.49884	utr_3	ENSSSCG00000007907
3	34742788	34743125	7.4515	3.90139	7.05477	TSS	ENSSSCG00000007907
3	34778436	34778908	3.83731	2.83511	4.91698	utr_3	ENSSSCG00000026710
3	34790632	34791862	6.33097	4.47048	6.29136	utr_3	ENSSSCG00000021236
3	34799445	34799674	7.60629	3.9749	10.7375	intron	ENSSSCG00000021236
3	38384839	38385023	7.13692	4.49176	12.6898	CDS	ENSSSCG00000007925
3	38394167	38394499	10.879	4.00682	14.3334	utr_3	ENSSSCG00000007925
3	38514368	38515411	6.20877	4.72443	6.05756	CDS	ENSSSCG00000007927
3	38515597	38516629	8.58065	4.94778	9.24072	CDS	ENSSSCG00000007927
3	38517352	38517604	3.81362	2.87657	4.19737	intergenic	-
3	38525261	38525596	2.45161	2.05936	2.95111	CDS	ENSSSCG00000007924
3	38662403	38662764	10.8168	5.64485	8.45421	intergenic	ENSSSCG00000007931
3	38663041	38663257	3.85094	2.87356	4.46324	intergenic	-
3	38670698	38670935	4.74957	2.20678	4.78839	utr_3	ENSSSCG00000007932
3	38745368	38745568	25.5376	4.35844	11.0832	intron	ENSSSCG00000007939
3	38747728	38748014	4.23807	4.30575	7.8904	Stop	ENSSSCG00000007939
3	38754085	38754567	4.16484	2.54271	5.15594	intergenic	ENSSSCG00000007930
3	38816790	38817544	7.25149	4.54258	5.19798	Stop	ENSSSCG00000023603
3	38896978	38897289	8.54921	3.76708	7.41984	CDS	ENSSSCG00000007942
3	38899090	38899395	5.05577	4.00976	6.36331	TSS	ENSSSCG00000007942
3	38926967	38927204	1.97711	2.73317	4.43697	intergenic	-
3	38930382	38930598	3.35484	1.99803	5.47227	TSS	ENSSSCG00000007943
3	38931045	38931248	4.80356	2.64512	3.61531	CDS	ENSSSCG00000007943
3	38938907	38939174	10.4942	4.4943	9.9762	intergenic	-
3	38973782	38974018	3.25309	2.48999	3.4938	TSS	ENSSSCG00000022874
3	39016831	39017527	4.17748	3.09474	4.08399	intron	ENSSSCG00000007944
3	39016831	39017527	4.17748	3.09474	4.08399	Stop	ENSSSCG00000025561
3	39017756	39018882	6.69658	4.57749	6.49163	CDS	ENSSSCG00000025561
3	39017756	39018882	6.69658	4.57749	6.49163	intron	ENSSSCG00000007944
3	39069871	39070549	9.53089	5.16737	10.7455	CDS	ENSSSCG00000023653
3	39071198	39071411	5.56326	3.11257	5.86241	utr_3	ENSSSCG00000023653
3	39140187	39140445	14.2427	5.23013	6.66006	intergenic	-
3	39476827	39477872	10.6557	5.34925	8.18565	CDS	ENSSSCG00000007950
3	39539012	39539288	6.48956	3.4684	7.95141	TSS	ENSSSCG00000007951
3	40173524	40173787	27.9017	8.62972	21.4749	intergenic	-
3	40174067	40174244	12.7781	14.1961	11.4508	CDS	ENSSSCG00000007958
3	40200810	40201416	8.0388	4.37508	7.01399	intergenic	-
3	40201763	40201956	15.9939	5.43934	10.3307	intergenic	-
3	40295389	40295622	37.5914	9.67574	38.3674	CDS	ENSSSCG00000007963
3	40461459	40461639	5.37993	3.61751	3.1912	Stop	ENSSSCG00000007967
3	40461943	40462176	9.57298	4.27506	9.89691	CDS	ENSSSCG00000007967
3	40478627	40478917	9.43501	5.92748	8.48692	intergenic	ENSSSCG00000029375
3	40479515	40479877	6.79402	3.71474	9.17732	CDS	ENSSSCG00000029375
3	40489531	40490385	4.36272	3.97039	4.39147	utr_3	ENSSSCG00000026248
3	40491066	40492061	5.66358	4.46939	5.79945	CDS	ENSSSCG00000029264
3	40492755	40492965	3.33886	2.40111	2.72409	intron	ENSSSCG00000029264
3	40535387	40535576	5.0978	3.32	3.86386	TSS	ENSSSCG00000023315
3	40535387	40535576	5.0978	3.32	3.86386	TSS	ENSSSCG00000023315
3	40535387	40535576	5.0978	3.32	3.86386	TSS	ENSSSCG00000027252
3	40613492	40613776	6.93548	5.40447	8.6081	TSS	ENSSSCG00000023304
3	40616824	40617104	5.12324	2.54639	5.49075	CDS	ENSSSCG00000023304
3	40865198	40865542	10.0124	7.06069	13.5081	intergenic	-
3	40894872	40895341	4.71363	2.9196	6.4929	CDS	ENSSSCG00000007982
3	40897469	40897644	2.81795	2.15099	3.32391	Stop	ENSSSCG00000007982
3	40960961	40961660	8.98926	7.76005	18.0163	utr_3	ENSSSCG00000007979
3	40962615	40963308	6.35165	3.6004	7.00646	Stop	ENSSSCG00000007979
3	40963945	40964145	2.85025	3.17634	4.07852	CDS	ENSSSCG00000007979
3	40991006	40991219	4.50055	2.72814	4.2609	intergenic	ENSSSCG00000007979
3	41021677	41021917	4.24491	1.80524	4.75357	utr_3	ENSSSCG00000007980
3	41041677	41042043	5.79901	3.58111	6.8921	CDS	ENSSSCG00000023204
3	41078947	41079190	2.09052	2.73959	2.8992	CDS	ENSSSCG00000023204
3	41079398	41079744	14.5054	5.64856	9.09143	CDS	ENSSSCG00000023204
3	41083059	41083341	5.03034	3.21557	4.82256	intergenic	-
3	41098606	41098800	6.22518	2.9928	6.7787	intergenic	ENSSSCG00000007985
3	41107896	41108170	6.77935	2.5005	5.60888	TSS	ENSSSCG00000007985
3	41143287	41143530	3.89534	1.68791	4.11653	intergenic	-
3	41143672	41143869	4.56891	2.64993	5.97881	intergenic	-
3	41290388	41290685	5.04959	2.72876	4.27639	CDS	ENSSSCG00000007993
3	41300258	41300493	3.8465	1.78073	3.05306	Stop	ENSSSCG00000007994
3	41303888	41304073	10.2605	6.62483	18.3838	intron	ENSSSCG00000007994
3	41348616	41348815	5.39809	2.24831	6.90355	TSS	ENSSSCG00000007995
3	41376538	41376941	4.84379	2.92272	4.7451	intergenic	ENSSSCG00000007997
3	41381886	41382245	2.87574	1.83413	3.36469	intron	ENSSSCG00000007999
3	41382454	41382656	6.03275	3.65661	6.51772	TSS	ENSSSCG00000008008
3	41386504	41386766	6.39292	4.39918	9.10868	intron	ENSSSCG00000007988
3	41391689	41392041	24.4227	9.85357	20.1648	intron	ENSSSCG00000008007
3	41418635	41418838	3.47311	2.43361	3.87805	TSS	ENSSSCG00000008004
3	41428321	41428671	5.29706	3.43548	5.79975	intergenic	ENSSSCG00000008002
3	41465402	41465898	4.9616	3.79734	7.15481	intergenic	ENSSSCG00000008000
3	41466669	41466869	5.06667	4.2887	7.71146	intron	ENSSSCG00000008000
3	41626664	41626889	1.94687	1.12256	2.41322	intergenic	-
3	41633208	41633559	4.11629	3.18534	4.18695	Stop	ENSSSCG00000008014
3	41634268	41635051	7.25681	6.7564	6.42899	CDS	ENSSSCG00000008013
3	41635260	41635587	5.27634	6.03812	5.07051	CDS	ENSSSCG00000008013
3	41645717	41645918	16.0717	16.2134	35.3848	intergenic	-
3	41653985	41654201	5.17335	3.33119	4.96265	intergenic	-
3	41658788	41659021	3.90712	2.4047	3.82	Stop	ENSSSCG00000008016
3	41659376	41659578	8.05288	4.27127	7.64637	intergenic	-
3	41681956	41682165	1.85914	3.05963	1.66625	intron	ENSSSCG00000008018
3	41705300	41705622	10.4275	6.2158	8.23798	utr_5	ENSSSCG00000008018
3	41709089	41709295	2.94054	1.38075	2.82202	utr_3	ENSSSCG00000008019
3	41710435	41710653	5.7552	3.42336	5.41878	Stop	ENSSSCG00000008019
3	41725026	41725315	15.8333	7.15483	15.4554	Stop	ENSSSCG00000008026
3	41737042	41737237	6.84409	6.27616	7.08175	CDS	ENSSSCG00000008026
3	41768452	41768689	18.0602	7.75008	16.4214	TSS	ENSSSCG00000008026
3	41806189	41806610	4.96433	3.13808	5.05785	intron	ENSSSCG00000008020
3	41806189	41806610	4.96433	3.13808	5.05785	Stop	ENSSSCG00000008021
3	41818083	41818298	3.36089	2.64805	4.36629	CDS	ENSSSCG00000008021
3	41818083	41818298	3.36089	2.64805	4.36629	intron	ENSSSCG00000008020
3	41986761	41987122	12.3769	6.5984	12.9609	Stop	ENSSSCG00000008030
3	42010671	42011011	5.94838	3.23853	5.35039	utr_3	ENSSSCG00000008031
3	42010671	42011011	5.94838	3.23853	5.35039	utr_3	ENSSSCG00000022963
3	42011648	42011931	3.6906	2.36493	5.25833	utr_3	ENSSSCG00000008031
3	42011648	42011931	3.6906	2.36493	5.25833	utr_3	ENSSSCG00000022963
3	42012192	42012456	6.31837	4.05058	8.72602	Stop	ENSSSCG00000022963
3	42012192	42012456	6.31837	4.05058	8.72602	utr_3	ENSSSCG00000008031
3	42013169	42013444	8.79466	3.96952	6.50756	CDS	ENSSSCG00000022963
3	42082566	42083087	5.87919	3.52831	4.239	Stop	ENSSSCG00000024405
3	42209651	42209978	9.03927	4.02109	12.0186	Stop	ENSSSCG00000023400
3	42210910	42211225	3.36611	2.3043	3.01375	CDS	ENSSSCG00000023400
3	42218559	42218791	7.55096	4.6623	6.7787	CDS	ENSSSCG00000023400
3	42235537	42235765	7.01078	2.66261	6.47217	intron	ENSSSCG00000008038
3	42238251	42238554	6.7444	3.67717	6.51912	Stop	ENSSSCG00000008038
3	42239875	42240125	3.0937	1.73517	3.4228	Stop	ENSSSCG00000008039
3	42244123	42244322	7.31767	4.10152	8.01825	CDS	ENSSSCG00000008039
3	42305953	42306231	25.2312	9.01191	22.5324	CDS	ENSSSCG00000008041
3	42306491	42306783	9.3638	5.92748	16.2689	CDS	ENSSSCG00000008041
3	42334179	42334408	24.5161	13.3131	25.2168	intergenic	-
3	42340263	42340512	8.81412	6.32846	8.13444	intergenic	-
3	42418511	42418641	4.33118	3.8703	6.39135	Stop	ENSSSCG00000008047
3	42434054	42434594	15.47	6.5651	12.0288	utr_3	ENSSSCG00000008051
3	42509842	42510001	3.41303	1.74338	3.03971	utr_5	ENSSSCG00000008048
3	42610237	42610580	7.16257	6.23882	9.57646	TSS	ENSSSCG00000022316
3	42642246	42642569	5.16683	4.18411	4.66212	CDS	ENSSSCG00000026326
3	42690381	42690575	15.8771	4.64174	10.9445	utr_3	ENSSSCG00000027098
3	42707066	42707266	3.68789	1.75363	4.18626	intron	ENSSSCG00000008057
3	42716267	42716473	2.79692	2.14488	2.98967	Stop	ENSSSCG00000008057
3	42824454	42824912	10.8922	5.34508	13.3928	intron	ENSSSCG00000008062
3	42828362	42828536	12.6295	2.39714	9.47078	intron	ENSSSCG00000008062
3	43235386	43235589	7.88207	3.45645	7.49687	CDS	ENSSSCG00000008069
3	43235906	43236106	3.4993	2.19167	4.57939	CDS	ENSSSCG00000008069
3	43476075	43476330	8.98925	6.21277	11.4724	intron	ENSSSCG00000008070
3	43476075	43476330	8.98925	6.21277	11.4724	utr_3	ENSSSCG00000028549
3	43705266	43705468	5.13202	3.6745	8.66497	TSS	ENSSSCG00000027166
3	44044687	44045009	8.22596	4.28569	7.48441	intergenic	-
3	44891828	44892050	18.8774	7.08079	10.9815	intergenic	-
3	45428277	45428556	27.4217	5.36089	12.7891	CDS	ENSSSCG00000008089
3	45544831	45545377	4.91865	4.1967	4.93877	CDS	ENSSSCG00000008098
3	45683575	45683851	18.4325	7.32218	10.1895	CDS	ENSSSCG00000008096
3	45960219	45960445	5.33333	4.95486	7.59214	Stop	ENSSSCG00000022493
3	47767635	47768125	26.1914	12.5523	21.7042	intergenic	-
3	49105021	49105245	5.44185	2.67541	5.61474	intergenic	ENSSSCG00000008130
3	49119990	49120169	4.12375	2.18434	4.2977	intergenic	-
3	49120744	49121403	11.3749	6.42169	9.6376	intergenic	-
3	49134699	49135235	2.54548	2.5856	3.04785	intergenic	ENSSSCG00000008132
3	49157951	49158112	2.66793	2.03284	2.47907	Stop	ENSSSCG00000008132
3	49158348	49158590	2.91859	1.59178	2.47103	utr_3	ENSSSCG00000008132
3	49717265	49717831	10.295	6.04466	7.97329	CDS	ENSSSCG00000008136
3	49718023	49718220	4.3871	3.80373	3.54662	CDS	ENSSSCG00000008136
3	49718590	49718828	5.25346	5.59222	5.69411	CDS	ENSSSCG00000008136
3	49719490	49719875	5.15937	3.82418	5.06299	CDS	ENSSSCG00000008136
3	50719800	50720004	9.72473	2.7894	16.1527	intergenic	-
3	50754030	50754348	36.7312	19.399	35.2492	CDS	ENSSSCG00000008141
3	51083036	51083224	17.8696	6.90377	12.4728	Stop	ENSSSCG00000008143
3	51413278	51413499	1.88895	2.48096	1.78472	CDS	ENSSSCG00000008144
3	51610259	51610418	4.61481	2.78504	4.26147	intergenic	ENSSSCG00000008147
3	51799772	51800216	7.10189	4.34754	6.5815	Stop	ENSSSCG00000024636
3	51834555	51835207	6.95105	4.80318	6.24576	CDS	ENSSSCG00000024636
3	54731000	54731203	5.91354	2.96073	5.40269	CDS	ENSSSCG00000008162
3	55034672	55034908	8.52825	4.62344	8.11552	utr_3	ENSSSCG00000008164
3	55068457	55068744	9.29845	5.34635	12.3354	CDS	ENSSSCG00000008164
3	55077198	55077431	4.25889	4.57851	5.87021	CDS	ENSSSCG00000008164
3	55578276	55578648	2.41468	1.83692	2.66516	TSS	ENSSSCG00000008168
3	55610439	55610799	10.1003	4.91891	8.21661	utr_3	ENSSSCG00000008167
3	55611012	55611355	3.91036	1.99274	3.73763	Stop	ENSSSCG00000008167
3	55626715	55626985	10.6732	4.50713	11.8073	TSS	ENSSSCG00000008167
3	56483603	56483819	69.8709	18.567	18.0992	Stop	ENSSSCG00000008175
3	57414768	57415060	35.0581	14.3715	38.66	CDS	ENSSSCG00000008179
3	57499168	57499399	3.30218	1.63877	3.65145	Stop	ENSSSCG00000008180
3	57499168	57499399	3.30218	1.63877	3.65145	utr_3	ENSSSCG00000008179
3	57523759	57523968	5.0871	2.47123	5.40211	CDS	ENSSSCG00000008180
3	57565846	57566096	10.8445	5.14191	11.9385	intergenic	-
3	58217394	58217661	7.06811	4.13308	6.33211	intergenic	-
3	58220404	58220617	6.6812	3.40274	7.00723	Stop	ENSSSCG00000025010
3	58409919	58410127	9.04371	5.42626	11.3882	intergenic	-
3	58847923	58848152	2.17482	1.41214	2.62627	intergenic	-
3	59248144	59248424	27.3979	13.7647	24.7752	intron	ENSSSCG00000008193
3	59248144	59248424	27.3979	13.7647	24.7752	Stop	ENSSSCG00000008197
3	59256477	59256763	12.9935	7.85794	14.2138	intron	ENSSSCG00000008193
3	59465634	59466970	15.1739	7.42316	12.477	CDS	ENSSSCG00000008201
3	59509645	59510004	11.616	8.18629	9.04359	intergenic	-
3	59513888	59514679	10.8837	4.77909	7.75545	intergenic	ENSSSCG00000008202
3	59864630	59864828	2.7318	2.00488	4.09433	nc_exon	ENSSSCG00000008207
3	60093244	60093615	32.7699	28.1951	28.1595	CDS	ENSSSCG00000008208
3	60553255	60553463	4.25466	1.97319	3.56665	nc_exon	ENSSSCG00000023294
3	60840997	60841512	20.9671	11.2074	22.1879	utr_3	ENSSSCG00000008216
3	60939999	60940128	6.17443	2.98865	5.42296	CDS	ENSSSCG00000008218
3	60940545	60941018	7.06906	4.48995	7.13568	CDS	ENSSSCG00000008218
3	61605016	61605269	5.99285	4.57379	6.15895	CDS	ENSSSCG00000008226
3	61722776	61722983	3.25644	2.3845	3.10587	TSS	ENSSSCG00000025805
3	61767619	61767823	3.69838	2.82649	3.5613	CDS	ENSSSCG00000008227
3	61786951	61787413	8.41721	4.85357	9.28448	intergenic	-
3	61834340	61834512	2.27001	1.8752	2.30476	intergenic	-
3	62024914	62025287	11.1855	9.36672	12.6536	CDS	ENSSSCG00000008230
3	62131228	62131447	8.45941	3.70639	5.53616	utr_3	ENSSSCG00000022300
3	62275598	62275836	4.2699	2.21228	4.60178	Stop	ENSSSCG00000027381
3	71103418	71103626	9.41102	4.45308	8.34977	Stop	ENSSSCG00000021007
3	71150886	71151066	4.21541	2.28516	3.80303	intergenic	-
3	71759447	71759678	4.54662	3.21279	4.42726	CDS	ENSSSCG00000008274
3	71759447	71759678	4.54662	3.21279	4.42726	intron	ENSSSCG00000008268
3	71836728	71837019	6.93789	3.31938	8.313	CDS	ENSSSCG00000008287
3	71836728	71837019	6.93789	3.31938	8.313	intron	ENSSSCG00000008268
3	71837769	71838031	13.0753	4.25502	18.5155	intron	ENSSSCG00000008268
3	71837769	71838031	13.0753	4.25502	18.5155	intron	ENSSSCG00000008273
3	71843702	71844059	3.46068	2.98962	3.54019	CDS	ENSSSCG00000022786
3	71843702	71844059	3.46068	2.98962	3.54019	intron	ENSSSCG00000008268
3	72081219	72081562	19.1226	5.26887	12.1474	CDS	ENSSSCG00000008292
3	72081761	72081950	12.6907	7.58369	14.119	CDS	ENSSSCG00000008292
3	72454476	72454662	8.80475	3.81219	7.20313	utr_3	ENSSSCG00000021579
3	73033778	73034082	8.11366	5.44408	9.25294	intergenic	-
3	74723139	74723385	6.4119	2.71113	6.9259	TSS	ENSSSCG00000023047
3	74778420	74778639	4.11325	3.98621	7.6081	CDS	ENSSSCG00000022708
3	74957005	74957193	8.6498	3.2271	7.81129	intron	ENSSSCG00000008316
3	74997765	74998094	4.05345	2.60049	5.28108	intergenic	-
3	75494395	75494652	5.67467	2.70396	4.56265	TSS	ENSSSCG00000029790
3	75714652	75714850	4.04302	1.90187	4.2299	Stop	ENSSSCG00000023409
3	75739644	75739837	8.8725	3.20781	4.43697	CDS	ENSSSCG00000008332
3	75815252	75815583	4.8324	2.65826	4.78742	intergenic	ENSSSCG00000027224
3	75966848	75967036	6.55757	3.27943	8.49598	intergenic	ENSSSCG00000008335
3	76056882	76057264	5.12519	2.73917	5.33351	CDS	ENSSSCG00000008335
3	76589447	76589679	4.51613	4.18411	5.54159	utr_3	ENSSSCG00000008340
3	77090552	77090782	3.70661	3.44906	3.84822	CDS	ENSSSCG00000008344
3	77094550	77094950	30.8419	8.08429	18.3129	Stop	ENSSSCG00000008344
3	77127596	77127837	31.4169	12.4776	20.3361	CDS	ENSSSCG00000008345
3	77470953	77471099	5.07834	1.70851	3.10588	utr_5	ENSSSCG00000008349
3	79099309	79099624	9.68075	4.49176	4.11971	intergenic	ENSSSCG00000008355
3	80443325	80443821	36.9376	14.4082	52.6236	CDS	ENSSSCG00000008357
3	80818266	80818531	13.6882	5.19065	10.1952	utr_5	ENSSSCG00000028282
3	81150647	81151530	13.4839	7.26935	10.2972	CDS	ENSSSCG00000008362
3	81230000	81230597	6.59002	4.1841	6.2624	CDS	ENSSSCG00000008363
3	81720689	81720894	4.77141	1.65162	7.2193	CDS	ENSSSCG00000027509
3	84575001	84575258	6.8574	3.07269	8.09747	intergenic	-
3	84864038	84864292	5.96712	2.97919	6.48988	CDS	ENSSSCG00000008387
3	84964066	84964467	9.34457	3.59136	12.405	intergenic	-
3	84965007	84965214	31.6894	7.32218	24.5284	intergenic	-
3	84968088	84968304	14.8982	4.75942	10.4463	CDS	ENSSSCG00000008388
3	90435822	90436144	9.56251	5.49465	7.52435	intergenic	-
3	90729250	90729551	5.40685	2.74819	6.06954	CDS	ENSSSCG00000029514
3	91013249	91013778	4.72418	2.67712	4.4999	CDS	ENSSSCG00000008409
3	91013249	91013778	4.72418	2.67712	4.4999	intron	ENSSSCG00000008409
3	91013249	91013778	4.72418	2.67712	4.4999	intron	ENSSSCG00000026559
3	92218374	92218697	5.80215	4.05335	9.92399	utr_5	ENSSSCG00000026974
3	92487901	92488098	5.68057	4.6324	7.17117	utr_3	ENSSSCG00000008412
3	96658785	96659051	22.9726	6.52228	16.1438	utr_3	ENSSSCG00000026180
3	97836778	97836982	14.914	6.18106	9.49021	CDS	ENSSSCG00000008422
3	98116909	98117112	13.4839	4.91632	19.3871	CDS	ENSSSCG00000029593
3	98142996	98143218	3.84086	3.90517	8.06049	Stop	ENSSSCG00000029593
3	99596193	99596432	13.2443	5.61368	13.1235	intergenic	-
3	99653367	99653586	6.27763	3.46271	7.40233	intergenic	-
3	99717869	99718175	11.3637	4.68235	9.53991	utr_3	ENSSSCG00000021325
3	99872380	99872964	15.5269	7.81034	12.7304	CDS	ENSSSCG00000008437
3	100058064	100058304	18.1103	8.44294	16.1639	Stop	ENSSSCG00000008439
3	100096591	100097047	14.6523	7.34595	14.2805	utr_5	ENSSSCG00000008439
3	100430455	100430718	20.0798	9.64669	19.6389	utr_3	ENSSSCG00000008444
3	100972933	100973158	48.6238	13.0753	59.9237	intergenic	-
3	102421433	102422055	11.804	6.54157	9.84481	CDS	ENSSSCG00000008451
3	102471551	102471990	7.23002	5.02371	8.55301	intergenic	-
3	102752306	102752595	5.45359	4.51693	4.48121	intergenic	-
3	103260202	103260496	2.49317	1.51868	3.0638	CDS	ENSSSCG00000008461
3	103261160	103261593	4.5459	3.19445	4.84315	Stop	ENSSSCG00000008461
3	104143467	104143689	7.35483	3.21524	5.19897	Stop	ENSSSCG00000008467
3	104290987	104291232	4.30736	2.14014	3.93602	intergenic	-
3	107318042	107318433	2.29445	0.948397	1.96495	intergenic	-
3	107431317	107431539	14.8354	4.62454	13.0151	CDS	ENSSSCG00000008478
3	107464677	107465265	4.87438	3.53447	5.70454	intergenic	-
3	107713412	107713825	4.91757	2.31735	4.71798	Stop	ENSSSCG00000008482
3	108143497	108143712	5.53423	2.15183	4.9194	CDS	ENSSSCG00000008487
3	109418914	109419305	7.73679	3.48364	6.17777	CDS	ENSSSCG00000008493
3	109829559	109829762	3.09974	1.67915	4.20869	CDS	ENSSSCG00000008499
3	110259749	110259965	12.481	5.23013	6.79465	Stop	ENSSSCG00000008504
3	110259749	110259965	12.481	5.23013	6.79465	utr_3	ENSSSCG00000008503
3	112947553	112948139	4.83762	3.62882	5.59999	CDS	ENSSSCG00000008508
3	113230289	113230463	8.95211	4.8631	6.98727	Stop	ENSSSCG00000008510
3	113673081	113673304	5.01596	2.11583	3.36998	CDS	ENSSSCG00000008511
3	114419383	114419790	3.28951	1.86244	4.07752	utr_5	ENSSSCG00000008515
3	114524677	114524898	7.06064	4.73465	7.78581	intergenic	-
3	117166340	117166613	8.20918	4.0907	6.08631	Stop	ENSSSCG00000008536
3	117297222	117297550	3.58351	2.23695	4.13614	intergenic	-
3	117490600	117490877	19.6129	10.5765	17.828	intergenic	-
3	117544011	117544214	9.73216	3.9904	10.168	utr_5	ENSSSCG00000024812
3	117544509	117544736	6.33333	7.40935	26.0302	utr_5	ENSSSCG00000024812
3	118364737	118364959	5.80645	2.40072	4.26174	intergenic	-
3	118461432	118461721	20.8971	7.43841	18.5736	intergenic	-
3	118505524	118505957	14.407	7.09602	12.1492	Stop	ENSSSCG00000008548
3	118508222	118508405	8.04944	1.99082	7.10879	utr_3	ENSSSCG00000008546
3	118508222	118508405	8.04944	1.99082	7.10879	utr_3	ENSSSCG00000008546
3	118508222	118508405	8.04944	1.99082	7.10879	utr_3	ENSSSCG00000008548
3	118698849	118699282	6.67066	4.54746	5.98695	utr_3	ENSSSCG00000025363
3	118700268	118700519	10.3058	6.11522	10.746	intergenic	-
3	118700999	118701285	11.1894	7.20597	12.5366	intergenic	-
3	118702722	118702955	23.0451	12.1455	20.5864	intergenic	-
3	118703744	118704011	9.2157	6.34437	8.91048	Stop	ENSSSCG00000027135
3	118706858	118707044	1.86247	2.58304	2.27395	CDS	ENSSSCG00000027135
3	118823095	118823315	4.44179	2.55982	5.02362	Stop	ENSSSCG00000028672
3	118928400	118928575	2.45161	1.55279	2.96393	Stop	ENSSSCG00000008550
3	118990907	118991152	3.14964	3.07888	4.26607	TSS	ENSSSCG00000008553
3	119017853	119018124	8.2349	5.82786	7.28033	Stop	ENSSSCG00000008555
3	119029711	119030028	3.31324	2.337	4.22217	utr_5	ENSSSCG00000008556
3	119030572	119031047	7.5006	5.23928	6.61268	Stop	ENSSSCG00000008557
3	119033134	119035037	8.12901	6.23342	7.32333	CDS	ENSSSCG00000008557
3	119038064	119038435	7.96301	7.238	12.0209	utr_5	ENSSSCG00000008557
3	119053587	119053856	4.17497	1.90462	3.78224	intron	ENSSSCG00000008558
3	119069341	119069612	5.6849	3.99951	6.79048	utr_3	ENSSSCG00000008559
3	119071410	119071664	15.9073	8.82758	17.5049	Stop	ENSSSCG00000008559
3	119079165	119079470	17.3099	7.78517	24.1709	CDS	ENSSSCG00000008559
3	119263935	119264198	12.791	11.0879	15.9073	intergenic	-
3	119264840	119265325	6.0176	3.77732	4.47395	intergenic	-
3	119280306	119280468	4.65451	2.39574	3.74184	utr_3	ENSSSCG00000008562
3	119282367	119282667	7.38961	3.22035	6.79225	Stop	ENSSSCG00000008562
3	119329813	119330150	11.1894	6.0062	9.4592	intergenic	-
3	119570290	119570557	15.8538	6.1297	16.2516	intergenic	ENSSSCG00000030643
3	119909077	119909399	3.38256	2.38186	3.95232	TSS	ENSSSCG00000008573
3	120167196	120167417	7.88018	8.85099	5.33258	CDS	ENSSSCG00000008575
3	120167959	120168854	22.8623	7.96907	12.7359	CDS	ENSSSCG00000008575
3	120169260	120169405	2.70699	6.27616	3.42809	Stop	ENSSSCG00000008575
3	120192039	120192240	7.35484	4.14924	6.24611	intergenic	-
3	120201180	120201380	17.7061	2.97715	6.01949	intergenic	-
3	120201867	120202129	8.33552	4.00977	5.76808	intergenic	-
3	120579743	120579945	8.54921	4.45938	10.0325	CDS	ENSSSCG00000028366
3	120636572	120636839	25.6698	14.1689	40.2654	intergenic	-
3	120640580	120640876	9.7459	5.45203	7.27928	intron	ENSSSCG00000029413
3	120772301	120772496	9.62485	4.99768	4.06722	CDS	ENSSSCG00000021155
3	121200767	121201018	10.1697	4.28871	12.9134	Stop	ENSSSCG00000008579
3	121200767	121201018	10.1697	4.28871	12.9134	utr_3	ENSSSCG00000008578
3	121228535	121228784	8.76636	4.25882	9.28065	utr_3	ENSSSCG00000008581
3	121230148	121230360	9.44892	4.88146	7.91257	Stop	ENSSSCG00000008581
3	121899186	121899472	16.2455	8.31457	21.5646	TSS	ENSSSCG00000008588
3	125071918	125072265	12.1968	6.02	13.4714	intergenic	-
3	125080947	125081163	6.98479	4.33664	9.88037	intergenic	-
3	125746417	125746871	11.8346	6.94584	8.83928	utr_3	ENSSSCG00000008598
3	125747594	125747904	8.07707	4.87219	7.03148	CDS	ENSSSCG00000008598
3	125988767	125988971	6.94624	3.43982	6.49738	utr_3	ENSSSCG00000008601
3	125989639	125989876	4.3167	3.88702	4.86774	utr_3	ENSSSCG00000008601
3	125990320	125990955	5.62995	3.6611	6.20322	Stop	ENSSSCG00000008601
3	127542726	127542914	7.66915	5.86937	4.38552	CDS	ENSSSCG00000008608
3	127546441	127547000	10.2501	4.70711	9.5661	CDS	ENSSSCG00000008608
3	129315555	129315784	28.3297	21.8359	81.8324	Stop	ENSSSCG00000008617
3	129822647	129822911	26.5007	7.67086	19.1973	Stop	ENSSSCG00000008618
3	129825893	129826125	36.6108	9.68321	21.1044	CDS	ENSSSCG00000008618
3	129946053	129946251	9.38272	6.09157	11.5044	intergenic	-
3	132792474	132792905	15.246	12.9446	8.84178	nc_exon	ENSSSCG00000008623
3	133662893	133663133	12.5305	2.72714	10.4663	Stop	ENSSSCG00000008624
3	134012241	134012441	10.7871	7.8452	7.6635	utr_5	ENSSSCG00000026161
3	134081551	134081760	7.35481	4.53278	5.43528	utr_3	ENSSSCG00000026161
3	134083186	134083410	5.14358	4.79429	6.7787	utr_3	ENSSSCG00000026161
3	134158650	134158889	10.1446	4.86403	11.5719	intergenic	-
3	134223744	134223914	29.4194	8.66708	12.039	Stop	ENSSSCG00000008629
3	134581218	134581416	3.68211	1.97583	3.39345	intergenic	-
3	135120787	135121247	13.1116	5.96957	12.422	Stop	ENSSSCG00000008641
3	135295102	135295577	16.1638	6.50498	12.2605	utr_3	ENSSSCG00000029313
3	135772765	135772948	4.01975	2.05987	3.36225	CDS	ENSSSCG00000008644
3	135773874	135774067	6.09499	4.04913	5.09057	utr_3	ENSSSCG00000008644
3	135774472	135774795	12.8492	5.1604	14.3204	utr_3	ENSSSCG00000008644
3	135802162	135802567	14.7594	7.49534	11.3268	utr_3	ENSSSCG00000008645
3	135818238	135818453	13.157	9.7131	21.2852	intergenic	-
3	135820639	135820884	11.7911	4.6324	15.3741	intergenic	-
3	135821700	135821948	6.919	3.51845	7.72772	intergenic	-
3	137503274	137503566	14.0255	6.46444	9.89045	intergenic	-
3	137652293	137652696	2.40054	1.52472	2.48241	intergenic	-
3	137702518	137702752	19.3794	7.26989	14.8744	Stop	ENSSSCG00000008647
3	137703272	137703542	19.5648	6.17156	21.8673	utr_3	ENSSSCG00000008647
3	139858007	139858241	8.61209	3.3899	8.64286	CDS	ENSSSCG00000025689
3	139870146	139870457	23.6559	8.48233	24.2185	TSS	ENSSSCG00000029345
3	139935606	139935932	6.743	3.17105	6.29496	utr_5	ENSSSCG00000017939
3	139943732	139944083	20.331	9.34125	19.5481	intergenic	ENSSSCG00000017941
3	140442098	140442311	4.93877	2.88295	5.3455	Stop	ENSSSCG00000025305
3	140444051	140444354	30.4408	10.5765	28.9142	utr_3	ENSSSCG00000025305
3	140468866	140469162	2.99688	2.29289	3.16528	utr_3	ENSSSCG00000029161
3	140473935	140474406	6.19033	4.9824	7.6168	utr_3	ENSSSCG00000024665
3	140475926	140476565	10.3295	7.05321	10.3607	utr_3	ENSSSCG00000024665
3	140477102	140477366	15.0123	7.35591	20.4988	Stop	ENSSSCG00000024665
3	140552530	140553022	4.07978	3.3206	4.60232	intron	ENSSSCG00000024665
3	140552530	140553022	4.07978	3.3206	4.60232	Stop	ENSSSCG00000025629
3	140564739	140564994	4.04802	2.48678	5.57506	CDS	ENSSSCG00000024665
3	143907570	143907728	33.914	13.5983	29.6327	Stop	ENSSSCG00000008664
3	143907989	143908189	12.19	5.90697	9.76131	CDS	ENSSSCG00000008664
3	144235315	144235523	6.47228	2.70524	9.54444	intergenic	-
3	144237554	144237767	10.4194	4.73788	8.54116	CDS	ENSSSCG00000030445
3	144249277	144249489	7.35484	7.22709	10.8459	intergenic	-
3	144271379	144271644	15.024	9.41425	24.6473	CDS	ENSSSCG00000023378
3	144279402	144279623	15.0812	7.52144	7.39494	CDS	ENSSSCG00000023378
3	144280103	144280857	18.1147	10.0702	12.1616	CDS	ENSSSCG00000023378
3	144289862	144290081	6.16618	2.84752	7.07696	utr_3	ENSSSCG00000030281
4	122017	122393	5.04946	3.76569	4.38485	intergenic	-
4	138628	138832	3.26881	3.59903	3.10946	intergenic	-
4	178664	178842	17.2294	5.69503	8.56257	CDS	ENSSSCG00000005890
4	187199	187459	23.232	23.0126	24.4033	intergenic	-
4	368671	369075	7.28056	3.53905	9.57848	utr_5	ENSSSCG00000005896
4	372898	373014	3.26882	1.74338	6.91427	CDS	ENSSSCG00000005896
4	374426	374943	15.7582	11.177	18.7092	Stop	ENSSSCG00000030451
4	375357	375792	13.4467	10.2278	12.9473	CDS	ENSSSCG00000030451
4	377824	378008	8.84066	5.47152	8.4473	TSS	ENSSSCG00000030451
4	386038	386289	4.19952	2.24658	4.71069	nc_exon	ENSSSCG00000005899
4	393661	394020	7.16728	4.48075	6.83535	Stop	ENSSSCG00000005901
4	404388	404644	16.1106	10.8089	6.98605	intergenic	-
4	424573	424977	39.1547	21.4871	35.9135	intron	ENSSSCG00000027076
4	435226	435910	5.30117	4.87149	7.24948	intron	ENSSSCG00000027076
4	436804	437001	2.18416	1.67364	2.7166	Stop	ENSSSCG00000027076
4	437203	437403	28.0184	8.36821	29.8651	utr_3	ENSSSCG00000027076
4	473456	473667	5.01076	2.46755	3.88645	TSS	ENSSSCG00000005906
4	477847	478137	7.11875	5.18111	10.6165	intron	ENSSSCG00000005906
4	512972	513190	7.64668	2.13753	7.23966	CDS	ENSSSCG00000005909
4	515227	515434	4.87768	2.24513	4.81287	CDS	ENSSSCG00000005909
4	599736	600104	7.74115	3.5016	8.76631	CDS	ENSSSCG00000005918
4	610480	610646	2.36989	1.78886	1.87617	Stop	ENSSSCG00000005917
4	678262	678447	4.15412	4.82781	10.8188	intron	ENSSSCG00000005921
[truncated: 5,711 more rows]

## Sheet: S3 Table. Adult peaks
Supplementary table 3: m6A peaks in adult stage
Chr	start	end	peak_Enrichment_adult 1	peak_Enrichment_adult 2	peak_Enrichment_adult 3	feature_centerOverlap	OverlapGene
1	256681	257124	4.03394	6.8095	3.14945	CDS	ENSSSCG00000029697
1	1069878	1070451	8.47273	7.70513	6.98965	intron	ENSSSCG00000004008
1	1069878	1070451	8.47273	7.70513	6.98965	utr_3	ENSSSCG00000004010
1	2670538	2670712	2.66309	6.76584	4.06423	Stop	ENSSSCG00000004017
1	2671164	2671922	5.04831	5.58295	4.64837	utr_3	ENSSSCG00000004017
1	2720467	2720668	1.76491	4.85456	2.60716	utr_3	ENSSSCG00000004018
1	2721543	2721854	4.47525	5.88614	4.34856	Stop	ENSSSCG00000004018
1	2724416	2724902	6.54906	5.39498	4.23199	CDS	ENSSSCG00000004018
1	2727301	2727628	20.729	29.6216	13.4678	CDS	ENSSSCG00000004018
1	2734685	2735531	6.4876	7.03758	7.58935	CDS	ENSSSCG00000004018
1	2775827	2776020	3.30804	3.28436	3.85032	CDS	ENSSSCG00000004018
1	2870293	2870477	16.7394	43.2466	22.2464	intergenic	-
1	2954910	2955253	8.96756	14.5305	17.7708	intergenic	-
1	3307082	3307279	2.73776	3.99189	2.4677	intergenic	-
1	3659580	3659803	3.06332	5.086	5.94316	utr_3	ENSSSCG00000004022
1	3681278	3681614	18.4778	11.6357	9.58808	intergenic	-
1	3689401	3689726	10.0636	8.61619	9.87265	intergenic	-
1	3715733	3715975	5.1414	6.46515	9.98234	intergenic	-
1	3720686	3721169	18.497	38.8783	18.4816	intron	ENSSSCG00000004020
1	3740937	3741122	18.7622	10.227	9.16024	intron	ENSSSCG00000004021
1	3741596	3741850	6.00093	4.00049	5.81031	intergenic	ENSSSCG00000004021
1	6386538	6386746	4.66313	9.31914	7.9146	intron	ENSSSCG00000004029
1	6555099	6555336	10.7329	10.1481	15.4964	intergenic	-
1	8537074	8537483	10.1247	9.69771	13.3641	CDS	ENSSSCG00000004037
1	9271221	9271424	3.96168	6.56999	2.61192	intergenic	ENSSSCG00000004044
1	9420564	9421072	5.73416	6.87098	11.7738	CDS	ENSSSCG00000004050
1	9427652	9428051	3.0741	3.66669	4.49505	intron	ENSSSCG00000004050
1	9447099	9447370	6.10497	8.46704	3.21237	intron	ENSSSCG00000004050
1	9447558	9447700	12.9731	8.29986	5.13378	intergenic	-
1	10050478	10050770	10.4241	17.2112	29.947	CDS	ENSSSCG00000004053
1	10381547	10381739	7.15231	10.0472	8.6276	intergenic	-
1	10382601	10382799	5.19371	7.78621	5.23156	intergenic	-
1	10383564	10383938	6.67893	6.86021	8.35703	intergenic	-
1	10428326	10428580	9.1392	6.91136	7.19607	intron	ENSSSCG00000004058
1	10429134	10429330	5.3088	4.78046	5.83583	CDS	ENSSSCG00000004058
1	11252935	11253242	4.7146	3.65354	3.70191	intergenic	-
1	11362319	11362745	11.1147	10.3944	5.54409	intergenic	-
1	11476059	11476820	12.6546	17.2045	17.6407	utr_3	ENSSSCG00000024528
1	11656141	11656351	6.52839	6.72461	5.23157	intergenic	-
1	11754790	11754983	4.75182	4.24784	7.64722	Stop	ENSSSCG00000004063
1	11889254	11889575	9.5056	6.5948	6.30052	CDS	ENSSSCG00000004064
1	11889965	11890952	11.0881	11.6465	15.0569	CDS	ENSSSCG00000004064
1	12312501	12312706	13.5311	26.4285	4.99117	intergenic	-
1	14083797	14084299	9.5048	10.1512	12.7151	CDS	ENSSSCG00000004070
1	14084827	14085003	5.09158	4.97086	7.54022	CDS	ENSSSCG00000004070
1	14166599	14166805	7.7777	7.19097	3.56512	intron	ENSSSCG00000004070
1	14317734	14318269	13.2986	15.0853	11.4845	intergenic	-
1	14450166	14450354	3.67126	4.90382	4.76176	Stop	ENSSSCG00000004071
1	15947796	15948006	5.9983	9.04505	14.3318	intergenic	-
1	16507573	16507900	6.6674	7.57739	7.72205	intergenic	-
1	17224492	17224741	4.96695	7.12525	6.78085	CDS	ENSSSCG00000004089
1	17303938	17304391	18.5808	24.8122	23.8507	Stop	ENSSSCG00000004090
1	17318666	17319129	6.69576	5.64525	9.67122	CDS	ENSSSCG00000004091
1	17319718	17320018	3.85007	2.09057	4.00796	CDS	ENSSSCG00000004091
1	17321002	17321223	6.42675	10.7753	4.13554	CDS	ENSSSCG00000004091
1	17321649	17321832	2.56323	2.33918	2.68912	CDS	ENSSSCG00000004091
1	18536582	18536804	2.70407	3.55426	2.37367	CDS	ENSSSCG00000004101
1	18600687	18600896	3.9756	4.26556	3.17296	utr_5	ENSSSCG00000004106
1	18625879	18626166	6.25115	6.87537	8.55629	utr_5	ENSSSCG00000004106
1	18853903	18854059	3.31507	2.86743	5.06534	utr_3	ENSSSCG00000004110
1	18878082	18878283	3.27667	3.59628	6.47835	CDS	ENSSSCG00000004110
1	18879091	18879263	3.15658	2.57839	6.58836	CDS	ENSSSCG00000004110
1	18930014	18930452	26.4315	22.6044	18.2934	intergenic	-
1	19580773	19581040	19.4596	12.1003	5.8468	intergenic	-
1	20706116	20706395	64.8653	70.7671	19.7573	utr_5	ENSSSCG00000004113
1	21320175	21320311	4.10974	4.64918	5.06247	Stop	ENSSSCG00000004117
1	21341697	21342044	11.5476	11.2032	7.18261	utr_5	ENSSSCG00000004117
1	22050594	22050890	36.2688	23.225	17.705	TSS	ENSSSCG00000004122
1	22134673	22134880	6.44961	6.17029	4.27815	Stop	ENSSSCG00000004122
1	23480486	23480825	7.28476	10.243	5.86717	Stop	ENSSSCG00000004125
1	23568850	23569062	2.4605	3.28839	3.1373	intergenic	-
1	24927789	24928140	22.8971	59.1183	52.6212	CDS	ENSSSCG00000004138
1	25290105	25290669	1.81153	2.24571	3.01386	TSS	ENSSSCG00000004139
1	25360351	25360571	7.30653	10.6628	9.25638	CDS	ENSSSCG00000004139
1	28295944	28296121	3.91284	5.49477	3.5049	CDS	ENSSSCG00000004142
1	28296262	28296653	5.57826	7.07235	6.8018	Stop	ENSSSCG00000004142
1	28455036	28455260	11.2394	13.9115	5.13378	intergenic	-
1	28530117	28530973	4.24996	5.72739	7.53582	CDS	ENSSSCG00000004144
1	28641217	28641446	27.4341	19.6576	8.27108	intergenic	-
1	28641712	28642069	13.9296	9.74142	5.98941	intergenic	ENSSSCG00000004146
1	28871801	28872043	6.60767	8.51828	13.0055	utr_5	ENSSSCG00000004149
1	29115175	29115483	11.5592	18.6831	16.4709	CDS	ENSSSCG00000004149
1	29116387	29116726	4.61945	5.82446	3.74575	CDS	ENSSSCG00000004149
1	29117568	29117768	2.16056	3.45902	2.38676	CDS	ENSSSCG00000004149
1	29123921	29124509	6.26088	5.30363	7.4562	CDS	ENSSSCG00000004149
1	29827199	29827729	7.53275	10.037	11.6752	utr_3	ENSSSCG00000004154
1	29829651	29829917	6.6173	7.83655	11.6265	CDS	ENSSSCG00000004154
1	30408367	30408756	3.26419	4.52411	4.28551	CDS	ENSSSCG00000004156
1	30408918	30409225	9.63182	8.7367	13.5324	intergenic	-
1	31208878	31209054	8.71211	6.67385	5.86717	intergenic	-
1	31299082	31299272	14.2883	7.95341	7.86366	intergenic	-
1	31432556	31432816	9.8444	10.3748	11.5714	Stop	ENSSSCG00000004165
1	31432991	31433196	8.85795	17.3486	18.1108	utr_3	ENSSSCG00000004165
1	32588619	32588841	5.02183	6.24806	8.50283	intergenic	-
1	32594932	32595313	3.86087	5.43835	3.95439	nc_exon	ENSSSCG00000004170
1	33255458	33255799	6.41792	6.4372	10.1269	utr_3	ENSSSCG00000021443
1	34509714	34509917	2.01155	1.96459	2.60554	CDS	ENSSSCG00000004180
1	34537527	34537718	4.03607	5.39093	4.17997	CDS	ENSSSCG00000004181
1	34543267	34543463	5.11149	5.28055	3.47188	Stop	ENSSSCG00000004181
1	34802953	34803286	5.66441	6.40291	4.0713	TSS	ENSSSCG00000004191
1	34886790	34887132	5.43583	5.987	10.8296	Stop	ENSSSCG00000004191
1	35134714	35134944	2.39678	3.65116	3.97065	Stop	ENSSSCG00000004192
1	35136857	35137091	2.39849	3.8645	2.78888	TSS	ENSSSCG00000004192
1	35243987	35244283	6.4908	9.63809	15.2302	Stop	ENSSSCG00000004193
1	35594633	35594845	13.7134	14.2518	9.93845	intergenic	-
1	35997373	35997723	7.28217	5.76163	6.81586	CDS	ENSSSCG00000004199
1	36035102	36035302	6.88267	8.8025	7.61849	intergenic	ENSSSCG00000004200
1	39594739	39595463	7.21102	7.99076	10.3696	CDS	ENSSSCG00000004217
1	39663526	39663797	30.8633	23.2531	33.4473	intron	ENSSSCG00000004218
1	45545599	45545893	14.2285	10.6297	9.77862	Stop	ENSSSCG00000004241
1	47894265	47895570	5.61583	5.48718	4.76361	utr_5	ENSSSCG00000004244
1	48365108	48365310	3.06209	4.64792	2.13907	intron	ENSSSCG00000004246
1	48365108	48365310	3.06209	4.64792	2.13907	utr_5	ENSSSCG00000004247
1	49532516	49532754	15.4395	11.6566	6.63113	utr_5	ENSSSCG00000020885
1	49584196	49584493	11.6161	11.6125	8.99996	TSS	ENSSSCG00000004253
1	49627446	49627674	6.87775	6.07926	4.77727	Stop	ENSSSCG00000004253
1	49647392	49647602	3.60409	4.60498	5.92002	Stop	ENSSSCG00000004254
1	49718627	49718824	8.27671	13.777	4.35595	intergenic	-
1	50435554	50435821	35.1529	20.7933	20.1928	intergenic	-
1	57650964	57651307	3.7972	4.23277	3.20521	CDS	ENSSSCG00000004279
1	57663294	57663580	5.32764	6.43757	5.20713	CDS	ENSSSCG00000004279
1	57663935	57664166	16.8916	10.4381	7.35841	intergenic	-
1	57767387	57767652	5.8588	5.34359	2.39373	intergenic	-
1	60997917	60998131	2.60289	3.48255	3.86618	intergenic	-
1	61000169	61000382	3.62008	3.11639	3.24472	CDS	ENSSSCG00000004294
1	62397085	62397307	18.5808	9.46475	10.838	CDS	ENSSSCG00000025140
1	62403548	62403853	35.9898	51.4217	31.4872	Stop	ENSSSCG00000025140
1	62812778	62813115	4.9816	5.03401	4.31702	utr_5	ENSSSCG00000004307
1	63871868	63872080	4.85133	3.21023	3.1092	Stop	ENSSSCG00000026249
1	64142105	64142333	3.88751	4.53318	2.67849	TSS	ENSSSCG00000004317
1	64551785	64551984	6.2993	8.65349	8.35885	intergenic	-
1	71041611	71041888	4.74284	5.90918	5.419	CDS	ENSSSCG00000004337
1	71079857	71080151	4.19981	4.80519	5.40979	Stop	ENSSSCG00000004337
1	74469047	74469324	3.85664	4.33036	5.78199	CDS	ENSSSCG00000004347
1	80376139	80376334	13.7054	6.61493	5.75605	intergenic	ENSSSCG00000004364
1	80817270	80817470	3.19653	3.20646	4.12663	Stop	ENSSSCG00000004368
1	82004855	82005077	9.97091	9.20996	15.2504	Stop	ENSSSCG00000004371
1	82059750	82059986	10.0436	10.952	17.2636	utr_3	ENSSSCG00000004371
1	82526329	82526587	5.92321	6.29042	6.13199	intergenic	-
1	83348945	83349347	27.4478	22.2338	9.7502	utr_5	ENSSSCG00000004382
1	83451515	83451737	2.26079	3.71816	3.47284	CDS	ENSSSCG00000004383
1	83886750	83886956	4.75697	4.41874	2.28168	utr_5	ENSSSCG00000004387
1	83887919	83888695	8.14613	9.18297	7.00616	CDS	ENSSSCG00000004387
1	84048500	84048904	3.57244	3.78308	4.93342	Stop	ENSSSCG00000004387
1	84065862	84066283	5.35821	6.03478	5.78061	intergenic	-
1	84463930	84464152	22.8772	6.98936	8.38517	utr_5	ENSSSCG00000020883
1	84789265	84789449	6.03815	3.87909	4.27815	Stop	ENSSSCG00000004408
1	86106287	86106511	9.03049	12.1306	17.0515	intergenic	-
1	86423345	86423539	3.72967	5.52598	5.95649	TSS	ENSSSCG00000004392
1	86469901	86470101	79.5123	43.829	20.7796	intergenic	-
1	87146513	87146791	6.21528	7.29771	8.07266	Stop	ENSSSCG00000004421
1	87423665	87423937	7.14974	6.51281	7.14263	intergenic	-
1	89851392	89851616	2.61841	2.60595	1.65014	utr_5	ENSSSCG00000023610
1	89853806	89854045	3.04961	3.09215	2.88976	Stop	ENSSSCG00000023610
1	89854246	89854636	11.6046	11.202	8.56556	utr_3	ENSSSCG00000023610
1	89962696	89962985	2.7879	2.92887	1.51135	CDS	ENSSSCG00000004432
1	92023001	92023982	4.31498	4.624	5.70324	intergenic	ENSSSCG00000004438
1	92024284	92025116	7.17592	6.3859	5.45291	CDS	ENSSSCG00000004438
1	92247085	92247298	7.6025	12.5226	6.53945	CDS	ENSSSCG00000004441
1	92247844	92248069	7.53275	10.0869	8.29302	CDS	ENSSSCG00000004441
1	92248325	92248577	11.6618	14.5835	15.4791	CDS	ENSSSCG00000004441
1	92329182	92329462	3.32969	4.94075	3.19931	CDS	ENSSSCG00000004444
1	94523214	94523415	3.92331	5.73127	5.7042	CDS	ENSSSCG00000004460
1	94547724	94547920	7.2936	8.09822	5.02681	CDS	ENSSSCG00000004460
1	95104472	95104722	6.59887	5.53325	5.56159	intron	ENSSSCG00000004464
1	95104942	95105544	6.16337	8.29988	6.66403	CDS	ENSSSCG00000004464
1	95106665	95107271	6.45898	7.06572	9.07782	CDS	ENSSSCG00000004464
1	96716336	96716564	8.28851	9.79088	6.98265	TSS	ENSSSCG00000004465
1	97114662	97114964	6.05311	5.62872	5.73807	intergenic	-
1	97116271	97116481	4.10481	4.88395	6.66953	intergenic	-
1	97758489	97758694	5.48799	5.02788	3.71495	Stop	ENSSSCG00000004470
1	101174429	101174647	6.29933	5.04201	7.03285	Stop	ENSSSCG00000020702
1	101299781	101300206	8.5264	9.53173	5.021	intergenic	-
1	101833121	101833477	9.74475	9.71359	12.4445	intron	ENSSSCG00000004484
1	106025739	106025946	8.57896	19.6576	10.933	CDS	ENSSSCG00000004500
1	106026217	106026417	8.00354	9.27434	9.06969	CDS	ENSSSCG00000004500
1	107930050	107930285	3.0131	2.51511	2.01325	CDS	ENSSSCG00000004506
1	108027066	108027273	12.2998	17.4734	14.7169	Stop	ENSSSCG00000004506
1	108089204	108089562	1.756	2.5664	3.52687	CDS	ENSSSCG00000004507
1	108116816	108117543	12.7483	16.9005	7.99544	CDS	ENSSSCG00000004507
1	108118200	108118355	7.06402	6.39364	4.32567	intergenic	-
1	109548792	109549061	7.56377	4.11353	3.31881	intergenic	-
1	109591096	109591342	4.69302	9.523	7.01616	utr_3	ENSSSCG00000004516
1	109627226	109627436	4.96095	3.84415	3.92713	CDS	ENSSSCG00000004517
1	110466190	110466393	21.4265	8.12513	21.5619	Stop	ENSSSCG00000024479
1	110509236	110509481	7.06659	7.40798	4.54327	utr_5	ENSSSCG00000004524
1	110613972	110614229	5.10553	4.18633	9.9253	CDS	ENSSSCG00000004525
1	114063358	114063768	21.0091	27.3783	9.88087	TSS	ENSSSCG00000004528
1	117246333	117246776	20.6721	23.4694	11.9503	nc_exon	ENSSSCG00000030235
1	117246333	117246776	20.6721	23.4694	11.9503	TSS	ENSSSCG00000004540
1	117590300	117590522	8.80641	10.2541	10.7488	intergenic	-
1	117595892	117596101	11.8372	15.4348	7.0096	intergenic	-
1	117597231	117597459	6.9636	6.07408	6.89257	intergenic	-
1	118018736	118019028	8.92769	10.3649	17.1126	CDS	ENSSSCG00000004547
1	118169045	118169165	4.42399	5.97008	3.42252	Stop	ENSSSCG00000004550
1	118181306	118181494	6.48653	5.47193	7.39508	CDS	ENSSSCG00000004551
1	118182512	118182711	5.51245	5.5478	4.87709	CDS	ENSSSCG00000004551
1	118378105	118378614	5.49558	5.72482	4.95826	CDS	ENSSSCG00000004551
1	120002190	120002396	2.89035	3.13137	4.83074	Stop	ENSSSCG00000026571
1	120133554	120134067	5.0347	5.84882	6.14231	Stop	ENSSSCG00000004569
1	120145069	120145268	3.34789	4.89255	4.22576	CDS	ENSSSCG00000004569
1	120234529	120234762	3.54783	3.39275	2.99174	intron	ENSSSCG00000004570
1	121351364	121351772	4.20008	5.62061	3.5958	Stop	ENSSSCG00000004573
1	121352091	121352344	2.75392	3.99053	2.67658	CDS	ENSSSCG00000004573
1	123140618	123140824	8.58672	8.59106	5.6264	TSS	ENSSSCG00000004576
1	123238548	123238960	5.45751	6.20115	5.75274	utr_3	ENSSSCG00000004576
1	124548739	124548953	4.48922	5.83773	9.32636	Stop	ENSSSCG00000004586
1	125013309	125013505	9.39984	12.144	10.6954	CDS	ENSSSCG00000004589
1	125109269	125109469	8.27125	10.0075	3.17086	TSS	ENSSSCG00000004589
1	125475814	125476099	8.47888	7.95341	6.38158	Stop	ENSSSCG00000004595
1	126391365	126391662	6.98872	7.68226	10.1433	CDS	ENSSSCG00000030605
1	126547477	126547916	15.7082	8.89554	4.75731	intergenic	-
1	126548580	126548800	1.34423	2.70838	2.11932	intergenic	-
1	126579398	126579598	2.66218	2.96474	1.6938	intergenic	-
1	128199197	128199375	32.5024	15.4764	15.8291	intergenic	-
1	128806368	128806591	14.7167	17.6918	12.5671	Stop	ENSSSCG00000004607
1	128807784	128808166	12.4466	13.8331	10.0679	intergenic	-
1	129025055	129025501	7.68437	10.6222	15.4817	CDS	ENSSSCG00000004610
1	129025055	129025501	7.68437	10.6222	15.4817	utr_3	ENSSSCG00000024046
1	131981755	131982185	6.94575	6.20484	6.53577	utr_5	ENSSSCG00000004616
1	131982456	131982636	2.44828	2.67141	2.43447	CDS	ENSSSCG00000004616
1	132018554	132019089	8.0493	11.4866	11.1545	intergenic	ENSSSCG00000004616
1	132089282	132090146	19.0487	20.2727	15.3123	intergenic	-
1	134286868	134287068	14.8795	19.8032	12.1499	CDS	ENSSSCG00000004634
1	135221426	135221631	1.47713	2.44445	1.71926	CDS	ENSSSCG00000004643
1	136509289	136509830	5.89759	6.19093	7.39428	CDS	ENSSSCG00000004653
1	136635479	136635679	14.3959	15.3228	16.4709	intron	ENSSSCG00000004655
1	136636721	136636946	5.31295	4.67077	4.27815	CDS	ENSSSCG00000004656
1	136636721	136636946	5.31295	4.67077	4.27815	intron	ENSSSCG00000004655
1	138044958	138045159	6.51642	16.0173	18.8238	CDS	ENSSSCG00000004663
1	140861302	140861537	3.70968	3.65221	2.51554	intron	ENSSSCG00000004672
1	141148775	141149009	12.3084	10.484	5.37824	intron	ENSSSCG00000004674
1	141310946	141311156	7.89892	8.44547	17.8256	intergenic	-
1	141742452	141742681	19.4488	12.277	11.1061	intron	ENSSSCG00000004691
1	141742452	141742681	19.4488	12.277	11.1061	intron	ENSSSCG00000004691
1	141742452	141742681	19.4488	12.277	11.1061	intron	ENSSSCG00000023996
1	141757219	141757421	7.00962	8.7367	9.62583	intron	ENSSSCG00000004690
1	141757219	141757421	7.00962	8.7367	9.62583	intron	ENSSSCG00000023996
1	142585107	142585423	6.84347	6.98936	5.8772	intergenic	-
1	142589073	142589396	6.87738	6.75496	4.28653	TSS	ENSSSCG00000004697
1	142644101	142644324	19.8363	36.4445	12.6331	TSS	ENSSSCG00000004701
1	142982745	142982957	6.27729	7.25818	5.09656	CDS	ENSSSCG00000004711
1	143982231	143982532	11.953	24.1715	22.9186	intron	ENSSSCG00000004729
1	144360893	144361111	33.7181	16.7939	10.8665	TSS	ENSSSCG00000004735
1	144486120	144486655	8.64871	10.8146	19.3192	utr_3	ENSSSCG00000027182
1	144545926	144546123	10.348	34.2914	11.2788	Stop	ENSSSCG00000004738
1	144622370	144622589	3.90587	4.59626	3.42252	utr_3	ENSSSCG00000020666
1	144624730	144625056	10.5817	20.2764	18.675	Stop	ENSSSCG00000020666
1	144947182	144947465	9.05722	7.66888	4.3851	CDS	ENSSSCG00000004746
1	144960260	144960809	3.53112	4.79501	5.51223	utr_3	ENSSSCG00000004747
1	145010250	145010496	22.3947	16.2189	15.0933	TSS	ENSSSCG00000004747
1	145539827	145540077	15.0057	31.4521	30.054	Stop	ENSSSCG00000004755
1	145541367	145541577	11.048	9.04872	5.35894	CDS	ENSSSCG00000004755
1	145571059	145571605	5.29494	6.14271	6.81171	Stop	ENSSSCG00000004757
1	145573976	145574566	5.78422	7.52927	11.1372	CDS	ENSSSCG00000004757
1	145574836	145575202	2.69399	4.75189	3.88018	CDS	ENSSSCG00000004757
1	145714755	145714967	4.03269	5.24202	4.27815	CDS	ENSSSCG00000004763
1	145714755	145714967	4.03269	5.24202	4.27815	intron	ENSSSCG00000004760
1	145714755	145714967	4.03269	5.24202	4.27815	intron	ENSSSCG00000004762
1	145717801	145717975	1.95406	4.02726	3.08027	intron	ENSSSCG00000004760
1	145717801	145717975	1.95406	4.02726	3.08027	utr_3	ENSSSCG00000004764
1	145930806	145931049	6.77186	15.6012	15.9361	intergenic	-
1	145931264	145931486	5.05671	7.1413	7.79575	CDS	ENSSSCG00000004771
1	145931679	145932018	11.754	23.0067	19.9128	CDS	ENSSSCG00000004771
1	145935689	145935944	3.88843	4.50072	2.93689	utr_3	ENSSSCG00000004772
1	145943159	145943731	5.06683	5.6682	6.91944	CDS	ENSSSCG00000004772
1	145958535	145958741	15.383	11.5518	6.84503	intergenic	-
1	146126731	146127860	17.6694	22.2621	15.1219	intergenic	-
1	146211862	146212038	5.23107	8.11265	2.28168	intergenic	-
1	146286649	146286876	12.3453	15.9008	17.2348	utr_3	ENSSSCG00000004779
1	146907552	146908009	9.13696	10.8536	6.6549	utr_3	ENSSSCG00000004789
1	148443040	148443293	13.7577	16.4125	22.3319	CDS	ENSSSCG00000004793
1	148550474	148550711	7.10297	14.3384	7.67753	intergenic	-
1	148735498	148735708	11.2468	9.72681	8.61739	intergenic	-
1	153854110	153854491	26.6785	16.0755	9.32638	intergenic	-
1	154042890	154043149	12.6941	15.4084	18.8239	CDS	ENSSSCG00000029613
1	154688326	154688532	2.12462	3.08573	3.21383	Stop	ENSSSCG00000028771
1	154775326	154775559	5.44032	4.89255	10.7809	CDS	ENSSSCG00000030487
1	155373374	155373574	4.48185	8.06856	11.3206	CDS	ENSSSCG00000004820
1	155426652	155426952	12.6814	21.5848	21.3907	CDS	ENSSSCG00000004821
1	156033848	156034291	28.4571	21.6476	13.3065	intergenic	-
1	157765643	157765875	4.78749	7.88161	7.49607	nc_exon	ENSSSCG00000004831
1	157783837	157784106	11.9322	9.17353	7.52604	utr_5	ENSSSCG00000004832
1	157856170	157856914	4.24883	5.9872	5.03599	CDS	ENSSSCG00000004832
1	159399450	159399658	7.30026	9.23594	8.27111	utr_3	ENSSSCG00000026006
1	159399998	159400843	4.08279	5.11721	3.06283	utr_3	ENSSSCG00000026006
1	159484716	159485228	4.72374	6.23147	3.11214	CDS	ENSSSCG00000026006
1	159860277	159860737	5.22487	6.74553	8.2784	CDS	ENSSSCG00000004844
1	159935585	159935828	4.54755	4.04072	3.97012	CDS	ENSSSCG00000004847
1	159967695	159967964	5.41416	7.05468	8.21674	Stop	ENSSSCG00000004846
1	160546750	160547033	4.42237	4.33822	4.1712	TSS	ENSSSCG00000004852
1	161283945	161284244	2.97806	2.87063	2.54172	intergenic	-
1	161557026	161557260	1.72708	3.35244	4.05113	intron	ENSSSCG00000004856
1	161792726	161792963	21.2213	16.3813	11.9788	utr_5	ENSSSCG00000004857
1	162978650	162978869	10.223	71.6409	12.5136	intergenic	-
1	163944345	163944761	6.63039	7.7208	10.9276	CDS	ENSSSCG00000004859
1	163944930	163945256	4.76821	7.22336	8.27986	CDS	ENSSSCG00000004859
1	164052905	164053080	2.94208	3.7859	4.38975	intergenic	-
1	164773997	164774400	9.55411	9.44307	8.06735	intergenic	-
1	164775954	164776386	38.0431	46.9727	17.1621	intergenic	-
1	164780304	164780517	8.25812	11.2329	10.5528	intergenic	-
1	164783272	164783468	3.16137	4.32532	4.21593	nc_exon	ENSSSCG00000004862
1	164783669	164783921	2.82976	3.50404	4.24647	nc_exon	ENSSSCG00000004862
1	164833081	164833572	4.54356	5.12151	6.2632	CDS	ENSSSCG00000004861
1	164834603	164834814	2.99753	2.83281	2.25791	CDS	ENSSSCG00000004861
1	164835463	164836054	6.33707	7.99245	7.58588	Stop	ENSSSCG00000004861
1	165071163	165071542	8.80564	8.75967	10.1861	nc_exon	ENSSSCG00000004863
1	165071830	165072459	11.5587	16.1293	12.1996	nc_exon	ENSSSCG00000004863
1	165529568	165529854	7.73912	7.21999	5.78806	intron	ENSSSCG00000004870
1	168992089	168993268	9.07634	10.2675	11.541	CDS	ENSSSCG00000004878
1	173662673	173662922	22.8971	24.6374	49.1511	Stop	ENSSSCG00000004886
1	175812360	175812534	2.70041	2.31858	3.58296	Stop	ENSSSCG00000025744
1	176120386	176120799	5.34186	5.99516	5.68382	Stop	ENSSSCG00000004896
1	176408419	176408620	5.71449	8.86778	5.8468	CDS	ENSSSCG00000004897
1	176409480	176409876	10.7038	11.9275	18.5386	CDS	ENSSSCG00000004897
1	176515164	176515420	12.0365	11.6697	11.0091	nc_exon	ENSSSCG00000021838
1	176515643	176515844	9.44583	11.1081	20.5351	intergenic	-
1	176595698	176595995	12.468	30.7422	27.3801	Stop	ENSSSCG00000004898
1	176608603	176608958	14.0691	20.0944	24.1858	CDS	ENSSSCG00000004898
1	176780801	176781013	3.53688	4.54308	6.64758	CDS	ENSSSCG00000004899
1	177064224	177064475	10.7925	17.6814	10.6419	intergenic	-
1	177064931	177065169	3.90587	3.44118	4.01774	TSS	ENSSSCG00000004902
1	180550941	180551158	11.6804	17.5113	9.54356	intergenic	-
1	180682133	180682327	5.72487	12.8668	5.68382	Stop	ENSSSCG00000004926
1	180693756	180693962	9.11702	12.3562	5.94664	CDS	ENSSSCG00000004926
1	180694427	180694627	2.56672	3.43443	2.46318	CDS	ENSSSCG00000004926
1	180699751	180699983	3.76639	4.39588	3.55877	Stop	ENSSSCG00000004927
1	181024992	181025167	5.60407	6.77094	6.6549	Stop	ENSSSCG00000004934
1	181142813	181143324	11.3313	13.105	13.9234	utr_3	ENSSSCG00000004936
1	182138436	182138648	5.43298	4.92602	2.8521	intergenic	-
1	182399479	182401108	11.4751	16.4168	14.8648	intergenic	ENSSSCG00000004948
1	182685440	182685636	9.82043	8.49842	5.18725	intergenic	-
1	182899025	182899223	4.4032	4.67223	9.14867	utr_3	ENSSSCG00000004952
1	182901391	182901600	4.66773	5.5639	6.32218	utr_3	ENSSSCG00000004952
1	182902627	182903215	6.33866	10.2152	9.69712	utr_3	ENSSSCG00000004952
1	183918911	183919570	5.49959	5.72448	3.83487	intron	ENSSSCG00000004958
1	183918911	183919570	5.49959	5.72448	3.83487	intron	ENSSSCG00000022419
1	183928165	183929113	3.37157	3.88239	4.05115	CDS	ENSSSCG00000022419
1	183928165	183929113	3.37157	3.88239	4.05115	intron	ENSSSCG00000004958
1	183929417	183929912	9.24051	9.99067	10.4965	intron	ENSSSCG00000004958
1	183929417	183929912	9.24051	9.99067	10.4965	Stop	ENSSSCG00000022419
1	183948646	183948883	5.82394	9.18762	10.2248	utr_3	ENSSSCG00000004958
1	184629834	184630495	33.7004	39.9129	12.5289	intergenic	-
1	185088289	185089178	6.63599	7.16409	8.79494	CDS	ENSSSCG00000026078
1	186647443	186647632	4.71494	4.10625	4.93006	CDS	ENSSSCG00000004973
1	187975760	187976103	24.1737	33.1412	41.1772	intron	ENSSSCG00000004980
1	187975760	187976103	24.1737	33.1412	41.1772	Stop	ENSSSCG00000020940
1	188627023	188627264	9.08712	11.3091	5.20509	CDS	ENSSSCG00000004989
1	194967642	194967891	9.8045	22.0602	20.1928	Stop	ENSSSCG00000004996
1	194971802	194971980	8.84052	6.92215	8.36615	CDS	ENSSSCG00000004996
1	194977246	194977433	6.39686	9.28274	8.55629	CDS	ENSSSCG00000004996
1	199864368	199864774	7.77327	8.98035	5.54079	TSS	ENSSSCG00000005006
1	199864954	199865180	4.16602	5.38363	4.29734	CDS	ENSSSCG00000005006
1	199865552	199866152	8.474	9.6275	12.8117	CDS	ENSSSCG00000005006
1	199875918	199876165	4.62009	6.34867	7.04249	CDS	ENSSSCG00000005007
1	199876450	199876715	10.1958	5.10761	4.08069	CDS	ENSSSCG00000005007
1	199876881	199877564	8.25812	11.3272	9.98234	TSS	ENSSSCG00000005007
1	199959110	199959316	11.3901	11.8673	11.4952	intergenic	-
1	200073909	200075135	7.14988	8.74024	7.69547	TSS	ENSSSCG00000005012
1	200174963	200175165	27.9789	13.105	20.6777	intergenic	-
1	200356060	200356287	7.24303	7.86303	5.07673	intergenic	-
1	200724465	200724803	21.1587	17.9102	11.7987	intergenic	-
1	201695348	201695800	4.99246	4.97021	9.23368	Stop	ENSSSCG00000005027
1	201696057	201696336	9.78744	10.7024	17.8154	utr_3	ENSSSCG00000005027
1	202405415	202405599	34.5251	96.5402	28.0647	intron	ENSSSCG00000027537
1	202405415	202405599	34.5251	96.5402	28.0647	utr_3	ENSSSCG00000029703
1	202588654	202589013	19.8165	35.5292	13.3234	intergenic	ENSSSCG00000005037
1	202628196	202628389	4.44526	3.66515	3.11449	TSS	ENSSSCG00000005039
1	202693784	202693971	3.4056	4.16033	2.35298	TSS	ENSSSCG00000005040
1	203017962	203018166	7.23735	8.15425	2.76434	CDS	ENSSSCG00000005043
1	203018497	203018701	10.8163	6.51892	3.20861	utr_5	ENSSSCG00000005043
1	203774335	203774602	7.33581	12.2937	8.27108	CDS	ENSSSCG00000005045
1	204900381	204900551	11.9567	5.24202	17.3978	CDS	ENSSSCG00000005053
1	204917942	204918125	2.88955	3.12337	4.46638	CDS	ENSSSCG00000005054
1	205237794	205238018	10.1034	7.5942	12.7204	nc_exon	ENSSSCG00000005057
1	205238692	205239180	5.99831	8.24288	8.76373	intergenic	ENSSSCG00000005057
1	206216375	206216591	38.5007	14.1035	13.8123	Stop	ENSSSCG00000021134
1	206501611	206501882	8.25426	9.57542	10.4815	Stop	ENSSSCG00000005062
1	206908393	206908598	17.6694	19.7122	17.5404	intergenic	-
1	207011020	207011192	6.44961	16.7245	7.93402	CDS	ENSSSCG00000005065
1	207103203	207103820	8.19195	6.84375	6.34265	CDS	ENSSSCG00000005064
1	210243377	210243587	10.6837	11.4742	15.8291	TSS	ENSSSCG00000005082
1	210373684	210374032	10.398	8.25435	5.75524	intergenic	-
1	210390805	210391231	4.19007	4.65957	5.33913	CDS	ENSSSCG00000005084
1	211525881	211526165	3.90379	5.39093	5.80687	intergenic	-
1	211527306	211527509	3.27814	3.64384	3.30029	intergenic	-
1	211586988	211587290	11.1945	10.1243	8.49927	utr_5	ENSSSCG00000030657
1	211816883	211817201	12.4051	16.2026	16.4403	utr_3	ENSSSCG00000005095
1	212635032	212635250	7.71082	5.14044	5.27307	Stop	ENSSSCG00000005102
1	212763958	212764206	6.0031	11.1785	6.87559	Stop	ENSSSCG00000005105
1	216298482	216298739	11.4447	13.2871	3.70326	utr_5	ENSSSCG00000028558
1	216418881	216419086	3.0689	3.53836	4.01076	intergenic	-
1	216419765	216420011	5.8982	6.97591	4.59901	intergenic	-
1	216446591	216446956	9.35614	11.1635	18.7169	CDS	ENSSSCG00000005112
1	216796811	216797007	5.82393	3.68189	6.84504	Stop	ENSSSCG00000022804
1	218224850	218225064	4.5653	6.26128	6.12105	Stop	ENSSSCG00000005122
1	218678118	218678321	4.21834	5.475	3.99294	TSS	ENSSSCG00000005127
1	218721132	218721320	6.81977	10.484	9.17856	Stop	ENSSSCG00000005127
1	219726452	219726847	5.50639	4.12669	6.63969	CDS	ENSSSCG00000005128
1	224076832	224077033	3.7863	3.28577	5.56158	Stop	ENSSSCG00000005135
1	224957322	224958046	8.12285	10.1394	12.92	CDS	ENSSSCG00000005150
1	224957322	224958046	8.12285	10.1394	12.92	intron	ENSSSCG00000005150
1	224957322	224958046	8.12285	10.1394	12.92	intron	ENSSSCG00000028884
1	224958362	224958976	7.22318	8.14991	8.98411	CDS	ENSSSCG00000005150
1	224958362	224958976	7.22318	8.14991	8.98411	intron	ENSSSCG00000005150
1	224958362	224958976	7.22318	8.14991	8.98411	intron	ENSSSCG00000028884
1	227420648	227420880	2.96688	2.99063	3.44073	CDS	ENSSSCG00000005174
1	230981743	230981945	7.04614	15.1922	7.17987	TSS	ENSSSCG00000005183
1	233480727	233481071	16.4242	16.0511	24.0749	intergenic	-
1	233603438	233603883	7.14855	4.06474	4.54553	intergenic	-
1	239146256	239146509	10.7212	8.0086	13.6901	intergenic	-
1	241128671	241129099	7.92587	7.80753	7.03002	CDS	ENSSSCG00000023898
1	241783938	241784182	7.20726	8.66949	11.4797	CDS	ENSSSCG00000005204
1	241784393	241784945	5.76033	5.67119	6.98432	CDS	ENSSSCG00000005204
1	241785104	241785884	8.67287	9.63855	8.89854	CDS	ENSSSCG00000005204
1	241842271	241842518	20.984	26.5844	25.241	TSS	ENSSSCG00000005205
1	241949140	241949350	6.22705	6.94967	15.7578	utr_5	ENSSSCG00000005205
1	241950645	241950860	4.85446	3.9545	7.23994	CDS	ENSSSCG00000005205
1	241951406	241951572	3.84022	2.465	1.5168	CDS	ENSSSCG00000005205
1	242045603	242045899	18.2612	26.8653	11.3371	CDS	ENSSSCG00000005207
1	242117338	242117669	5.58979	5.51503	9.66862	Stop	ENSSSCG00000005208
1	242978743	242979226	4.59577	4.96768	4.92982	utr_3	ENSSSCG00000005217
1	242999114	242999300	5.90403	4.17946	2.74392	intron	ENSSSCG00000005217
1	243189332	243189591	4.71748	4.7482	5.36713	intergenic	-
1	243189776	243190598	4.62102	4.79752	4.96073	CDS	ENSSSCG00000005220
1	245565427	245565646	2.61554	2.02357	1.88412	CDS	ENSSSCG00000005232
1	245677089	245677353	6.23145	6.57747	2.30242	intergenic	-
1	247301922	247302163	2.57735	1.76633	2.5894	CDS	ENSSSCG00000005235
1	247885814	247886096	5.0617	4.79339	4.12259	intergenic	-
1	248523603	248523925	8.97654	7.24418	9.24081	intergenic	ENSSSCG00000005245
1	248524463	248524765	8.8422	8.66949	5.13379	TSS	ENSSSCG00000005245
1	248848348	248848672	4.93216	6.58418	4.59272	CDS	ENSSSCG00000005247
1	248882991	248883166	3.56814	5.63517	2.41937	Stop	ENSSSCG00000005247
1	249498716	249498990	11.8073	22.4772	36.5476	Stop	ENSSSCG00000005252
1	250030099	250030985	4.35598	5.08566	4.45436	utr_5	ENSSSCG00000021646
1	250053996	250054276	3.5346	4.67207	5.01213	Stop	ENSSSCG00000021646
1	251551753	251551970	12.0315	21.8417	11.4084	CDS	ENSSSCG00000005260
1	251726251	251726494	5.02183	5.91012	8.7423	CDS	ENSSSCG00000021802
1	251758858	251759146	5.64046	5.99577	2.83506	TSS	ENSSSCG00000021802
1	252239945	252240160	3.06608	2.66717	1.92463	utr_5	ENSSSCG00000005264
1	254943830	254944371	4.40805	5.33609	3.01371	TSS	ENSSSCG00000025640
1	254991139	254991396	15.5305	13.2714	11.2583	CDS	ENSSSCG00000005271
1	255039829	255040044	5.61469	4.93138	3.61997	intergenic	-
1	256220287	256220491	9.20669	11.8431	22.4603	CDS	ENSSSCG00000005277
1	257571819	257572070	7.60553	7.52116	3.87346	intergenic	-
1	261897907	261898896	6.12246	6.91372	4.64449	intergenic	-
1	263424105	263424312	6.92404	5.99088	4.33519	CDS	ENSSSCG00000005301
1	264034887	264035004	2.41245	2.13564	2.0856	CDS	ENSSSCG00000005308
1	264035564	264035820	3.37675	6.5001	9.48972	CDS	ENSSSCG00000005308
1	264046498	264046755	7.79315	9.05119	5.45066	CDS	ENSSSCG00000005308
1	264066225	264066467	10.9703	7.5983	4.06861	intergenic	-
1	264070082	264070238	1.78023	2.53063	2.52968	CDS	ENSSSCG00000005310
1	264070521	264070929	3.05162	3.84266	5.14758	Stop	ENSSSCG00000005310
1	264134530	264134725	2.60391	2.90647	4.06167	TSS	ENSSSCG00000005316
1	264175570	264175909	18.4586	14.3864	8.81773	intergenic	-
1	264176182	264176496	1.72839	2.05009	1.18472	TSS	ENSSSCG00000005318
1	264192609	264192859	3.48844	5.12896	4.83339	TSS	ENSSSCG00000005319
1	264234043	264234224	20.2443	14.0411	32.5139	utr_5	ENSSSCG00000005322
1	264234884	264235115	6.22268	10.3921	19.8934	CDS	ENSSSCG00000005322
1	264259231	264259440	3.79994	4.97802	2.92094	intron	ENSSSCG00000005323
1	264392739	264393122	3.45251	4.04742	5.5616	intergenic	-
1	264674082	264674281	6.69578	5.98623	3.49382	Stop	ENSSSCG00000005338
1	264858388	264858601	6.53379	8.32556	5.01154	intergenic	-
1	265047416	265047646	11.1197	12.8866	5.91162	intergenic	-
1	266103962	266104175	5.28966	12.1343	11.551	intergenic	-
1	266262366	266262586	2.84969	3.90031	4.43733	utr_5	ENSSSCG00000005350
1	266502625	266502839	6.84795	6.63192	4.55039	TSS	ENSSSCG00000005356
1	266612046	266612326	15.763	11.2329	15.7222	Stop	ENSSSCG00000005356
1	266626287	266626718	7.84455	11.2009	13.8966	intergenic	-
1	266866078	266866271	3.76257	5.62728	3.45152	intergenic	-
1	266866739	266867015	11.246	14.2006	8.0845	intergenic	-
1	267166543	267166751	2.45444	3.75943	3.09263	CDS	ENSSSCG00000005361
1	267167230	267167903	4.92602	5.41802	5.8242	Stop	ENSSSCG00000005361
1	267258002	267258207	3.23629	3.44118	2.30495	intron	ENSSSCG00000025655
1	267393696	267393910	4.54356	5.35475	3.76475	CDS	ENSSSCG00000005364
1	267880010	267880194	4.35225	6.42771	5.23444	CDS	ENSSSCG00000005370
1	268034153	268034466	8.39075	4.26556	4.75078	Stop	ENSSSCG00000005372
1	268051444	268051651	6.19359	8.9988	4.81292	TSS	ENSSSCG00000005373
1	269211218	269212060	5.97522	7.979	8.74881	CDS	ENSSSCG00000005383
1	269215428	269215642	2.41359	2.84752	2.5859	CDS	ENSSSCG00000005383
1	270000281	270000657	17.6053	21.0475	13.5734	Stop	ENSSSCG00000005386
1	270382919	270383207	9.86749	8.00864	11.3592	CDS	ENSSSCG00000005388
1	275504554	275505097	7.2967	9.32589	13.3799	Stop	ENSSSCG00000026173
1	276190803	276191025	5.96499	9.14076	4.32366	intergenic	-
1	278901689	278901941	2.8409	3.08587	1.93555	utr_5	ENSSSCG00000005436
1	278945686	278945868	3.09736	3.53629	3.44483	Stop	ENSSSCG00000005436
1	279059096	279059309	11.2991	19.6576	16.6459	CDS	ENSSSCG00000005437
1	280616263	280616567	3.98853	5.58846	4.30224	intergenic	ENSSSCG00000005444
1	280912991	280913220	3.98793	4.81925	2.8521	intergenic	-
1	281918796	281919065	5.04175	5.51611	6.38991	nc_exon	ENSSSCG00000005451
1	281949046	281949507	11.4283	12.7167	16.2682	intergenic	-
1	283177321	283177628	11.5223	12.562	13.1635	intergenic	-
1	283224626	283224826	5.38451	2.83943	3.9831	Stop	ENSSSCG00000005460
1	283440533	283440793	16.9648	11.6616	11.8278	intergenic	-
1	284186820	284187077	4.36421	6.17809	10.512	Stop	ENSSSCG00000026194
1	284234558	284234796	11.1089	13.8331	5.56159	utr_5	ENSSSCG00000005471
1	284359000	284359233	13.5311	17.6481	16.1958	intergenic	-
1	284598752	284599034	4.81893	6.98936	4.27815	utr_3	ENSSSCG00000023714
1	284607227	284607552	4.5537	6.03626	6.78212	CDS	ENSSSCG00000005477
1	284676382	284676711	2.6284	3.12896	3.58888	Stop	ENSSSCG00000024648
1	284829898	284830236	6.41678	4.77452	4.64086	Stop	ENSSSCG00000005478
1	284950081	284950337	23.1363	46.5957	16.3425	intron	ENSSSCG00000005480
1	284951818	284952150	10.5877	10.7961	9.98234	intron	ENSSSCG00000005480
1	284990162	284990400	4.53896	5.24202	8.91281	CDS	ENSSSCG00000005480
1	285698998	285699182	10.5086	14.8524	27.2375	CDS	ENSSSCG00000005484
1	285699580	285700086	8.69522	11.7813	13.6901	Stop	ENSSSCG00000005484
1	286260780	286260970	2.09243	3.33583	16.9571	intergenic	-
1	286781254	286781869	16.16	11.3577	27.2375	CDS	ENSSSCG00000005494
1	289784533	289784711	5.52401	7.81445	8.31181	CDS	ENSSSCG00000005503
1	289785082	289785314	7.07241	5.89725	8.24109	Stop	ENSSSCG00000005503
1	292737835	292738072	8.02098	8.21249	12.9567	CDS	ENSSSCG00000005506
1	292827548	292827700	14.0611	20.5935	4.49205	CDS	ENSSSCG00000005506
1	292891699	292892086	6.14103	8.6255	9.6797	Stop	ENSSSCG00000021318
1	292927726	292927957	8.07432	7.19493	6.31027	intergenic	-
1	293274246	293274448	14.4677	7.86303	7.52954	intergenic	-
1	293630157	293630533	2.13475	3.13564	3.47188	utr_3	ENSSSCG00000005518
1	293631516	293631758	4.32434	4.28514	7.03105	CDS	ENSSSCG00000005518
1	294001362	294001829	10.8163	18.8809	13.9307	intergenic	ENSSSCG00000005524
1	294010924	294011178	4.36422	4.41556	6.25493	CDS	ENSSSCG00000005524
1	297214717	297214949	3.90061	3.91071	7.02653	CDS	ENSSSCG00000005574
1	297292243	297292504	11.1796	20.5648	32.6361	CDS	ENSSSCG00000005576
1	297483176	297483391	6.96008	10.82	15.0211	intergenic	-
1	298728124	298728331	3.83076	3.86106	1.77095	intergenic	ENSSSCG00000005586
1	298940678	298940887	3.9114	3.95916	2.76042	Stop	ENSSSCG00000005587
1	299470751	299470950	3.49344	3.31994	2.39226	TSS	ENSSSCG00000005596
1	299478471	299478729	7.70355	9.17353	9.46225	Stop	ENSSSCG00000005596
1	299840592	299840834	3.50482	3.90386	2.52089	intron	ENSSSCG00000005602
1	299840592	299840834	3.50482	3.90386	2.52089	Stop	ENSSSCG00000029141
1	299984397	299984632	7.96255	7.92854	8.65138	intron	ENSSSCG00000028891
1	300175979	300176200	5.39382	4.01319	2.85566	TSS	ENSSSCG00000029169
1	301002203	301002767	7.28345	9.86733	13.8327	intergenic	-
1	301003621	301003983	9.87627	9.49641	20.5351	intergenic	-
1	301919139	301919397	10.6016	5.46043	4.35593	intergenic	-
1	301921613	301921789	11.4893	43.6835	3.15027	utr_3	ENSSSCG00000005614
1	301922253	301922776	5.4752	4.06181	7.57546	Stop	ENSSSCG00000005614
1	302142156	302142397	14.9347	14.1534	5.16094	intergenic	-
1	302142617	302143089	13.2554	16.0216	8.82311	TSS	ENSSSCG00000005621
1	302232210	302232757	4.99419	5.57188	7.32475	utr_3	ENSSSCG00000005625
1	302265913	302266116	3.74712	5.16064	3.69107	TSS	ENSSSCG00000005625
1	302293934	302294138	10.2639	9.07272	2.83913	intergenic	-
1	302304886	302305217	5.195	4.19361	3.25139	intron	ENSSSCG00000005623
1	302386756	302386992	4.37508	4.1742	8.31183	intergenic	-
1	302387216	302387444	8.02508	8.63962	3.22506	intergenic	-
1	302448497	302448739	48.0422	44.9941	102.39	intergenic	-
1	302565634	302565854	8.82307	9.57396	13.4334	Stop	ENSSSCG00000005636
1	302576541	302576840	5.42588	6.01488	5.26541	intron	ENSSSCG00000022655
1	302581056	302581273	4.82362	6.40691	3.14807	TSS	ENSSSCG00000022655
1	302606516	302606741	6.69576	9.77422	7.27288	intergenic	ENSSSCG00000022295
1	302632104	302632322	13.0491	19.0619	7.74344	intergenic	-
1	302736514	302736922	4.85443	5.51383	4.22897	utr_3	ENSSSCG00000005645
1	302758526	302758803	4.26061	5.61121	7.53071	intron	ENSSSCG00000005645
1	302758526	302758803	4.26061	5.61121	7.53071	Stop	ENSSSCG00000005646
1	302764549	302764756	6.16881	5.3428	4.56336	intron	ENSSSCG00000005645
1	302764549	302764756	6.16881	5.3428	4.56336	TSS	ENSSSCG00000005648
1	302778511	302778736	3.21473	2.85541	3.13731	intron	ENSSSCG00000005645
1	302778511	302778736	3.21473	2.85541	3.13731	utr_3	ENSSSCG00000005648
1	302804139	302804407	9.36721	8.35169	4.99957	intron	ENSSSCG00000005645
1	302804139	302804407	9.36721	8.35169	4.99957	utr_3	ENSSSCG00000005649
1	303105146	303105487	9.53069	14.3888	15.9475	utr_3	ENSSSCG00000005657
1	303105146	303105487	9.53069	14.3888	15.9475	utr_3	ENSSSCG00000005658
1	303166049	303166300	1.85857	4.45574	2.91612	intergenic	-
1	303170181	303170393	4.49595	5.08719	2.67095	CDS	ENSSSCG00000005661
1	303173299	303173546	1.25546	3.11763	3.11695	intron	ENSSSCG00000005661
1	303173299	303173546	1.25546	3.11763	3.11695	intron	ENSSSCG00000005662
1	303173707	303173822	5.18624	3.88632	5.06042	intron	ENSSSCG00000005662
1	303173707	303173822	5.18624	3.88632	5.06042	Stop	ENSSSCG00000005661
1	303245530	303245736	4.42746	4.91311	6.36141	CDS	ENSSSCG00000005664
1	303252805	303253389	10.7239	14.3786	18.7098	Stop	ENSSSCG00000005664
1	303254145	303254364	4.47683	4.40633	3.6621	utr_3	ENSSSCG00000005664
1	303273652	303273983	17.5764	15.0066	19.2265	Stop	ENSSSCG00000005666
1	303274481	303274700	9.78613	11.9583	13.1456	CDS	ENSSSCG00000005666
1	303330077	303330294	5.68235	7.10697	5.44731	utr_3	ENSSSCG00000005668
1	303332128	303332798	7.35081	4.51395	3.80756	intron	ENSSSCG00000005668
1	303333546	303333933	4.49321	4.18115	3.06435	intron	ENSSSCG00000005668
1	303348255	303348456	9.93292	9.93603	5.26192	TSS	ENSSSCG00000005668
1	303378715	303379487	5.76496	6.43697	4.62673	utr_3	ENSSSCG00000005669
1	303398727	303399115	6.2702	6.68239	7.26216	utr_3	ENSSSCG00000005670
1	303417267	303417527	2.82479	2.45081	1.44729	TSS	ENSSSCG00000005671
1	303418090	303418290	7.61507	6.137	4.02146	utr_5	ENSSSCG00000005672
1	303446367	303446773	7.39001	6.74363	5.51085	utr_3	ENSSSCG00000005672
1	303446923	303447123	3.04409	2.73573	2.32134	utr_3	ENSSSCG00000005672
1	303470162	303470963	15.6932	21.2074	27.1016	nc_exon	ENSSSCG00000005673
1	303695599	303696016	13.8245	12.8242	9.47531	Stop	ENSSSCG00000005678
1	303697034	303697759	8.8917	11.889	13.2933	Stop	ENSSSCG00000005679
1	303865049	303865232	3.83853	5.76622	6.4707	intron	ENSSSCG00000005683
1	303869023	303869719	7.59067	11.1903	9.67623	intergenic	ENSSSCG00000005683
1	303873031	303873441	6.28654	7.79348	7.0035	Stop	ENSSSCG00000025964
1	303922217	303922428	12.7554	15.0112	12.5289	CDS	ENSSSCG00000024341
1	303934959	303935215	6.62137	10.9572	7.96621	utr_3	ENSSSCG00000024341
1	303952522	303952721	3.42263	3.49468	2.17198	Stop	ENSSSCG00000005689
1	304435199	304435411	14.5973	20.7933	14.2631	intron	ENSSSCG00000005699
1	304436596	304437217	7.78579	10.7025	4.11727	CDS	ENSSSCG00000005699
1	304437839	304438100	6.56701	2.83943	4.73327	intron	ENSSSCG00000005699
1	304438396	304438629	3.33294	2.12177	3.44035	intron	ENSSSCG00000005699
1	304441469	304441802	7.10075	10.2656	6.64759	CDS	ENSSSCG00000005699
1	304442464	304442959	4.54439	2.62101	3.31651	CDS	ENSSSCG00000005699
1	304443399	304443799	11.4934	12.013	8.21076	intron	ENSSSCG00000005699
1	304444955	304445237	5.68609	6.3341	7.97245	CDS	ENSSSCG00000005699
1	304476336	304476543	7.30448	10.7223	6.61168	intron	ENSSSCG00000005701
1	304478987	304479285	35.4318	18.6383	25.0272	intron	ENSSSCG00000005701
1	304480128	304480386	15.763	11.8716	9.24893	intron	ENSSSCG00000005701
1	304481184	304481382	7.3235	7.42619	11.3676	intron	ENSSSCG00000005701
1	304506162	304506394	4.85984	5.72254	2.83428	intron	ENSSSCG00000005701
1	304506955	304507130	6.13779	5.69965	5.98941	intron	ENSSSCG00000005701
1	304575285	304575483	10.9955	14.5935	6.33165	TSS	ENSSSCG00000005702
1	304679985	304680206	3.14966	6.6149	4.0728	intergenic	-
1	304685618	304685930	13.6099	12.5888	12.8344	intergenic	ENSSSCG00000005706
1	304826254	304826822	2.55576	3.77734	3.33124	CDS	ENSSSCG00000005706
1	304827037	304828188	4.12078	4.05999	5.38008	Stop	ENSSSCG00000005706
1	305207956	305208133	3.62688	18.6965	4.70596	CDS	ENSSSCG00000005711
1	305285688	305286070	29.1546	13.2507	6.08448	intergenic	-
1	305417165	305418709	6.43952	8.25024	7.13188	CDS	ENSSSCG00000005715
1	305435193	305435437	2.91299	3.45356	4.41396	Stop	ENSSSCG00000005715
1	305435750	305436198	6.48032	7.86302	13.2371	utr_3	ENSSSCG00000005715
1	305438527	305438899	2.69782	3.96868	5.77925	utr_3	ENSSSCG00000005715
1	305456275	305456431	2.06453	2.31974	2.38539	utr_3	ENSSSCG00000005717
1	305457588	305457785	4.45563	3.01186	2.30362	Stop	ENSSSCG00000005717
1	305461904	305462167	34.2278	31.9897	15.6051	CDS	ENSSSCG00000005717
1	305502418	305502793	5.98901	6.23705	3.35314	utr_3	ENSSSCG00000005719
1	305504236	305504486	5.63346	5.37791	4.34945	Stop	ENSSSCG00000005719
1	305632920	305633148	22.9523	15.5642	7.08948	TSS	ENSSSCG00000005719
1	305733832	305734030	7.89892	5.28362	9.41192	Stop	ENSSSCG00000005720
1	306154461	306155017	14.7611	19.4537	28.4411	intergenic	ENSSSCG00000005724
1	306234753	306235078	7.87613	7.17826	7.95418	CDS	ENSSSCG00000005725
1	306417291	306417671	31.184	36.6618	36.079	Stop	ENSSSCG00000005729
1	306712837	306713261	5.34186	7.23283	7.11242	Stop	ENSSSCG00000005738
1	306730375	306730562	9.37986	9.5558	4.27815	Stop	ENSSSCG00000005739
1	306795402	306796030	18.8916	23.6581	15.588	intron	ENSSSCG00000005733
1	306795402	306796030	18.8916	23.6581	15.588	intron	ENSSSCG00000005739
1	306795402	306796030	18.8916	23.6581	15.588	Stop	ENSSSCG00000005733
1	306825182	306825469	23.0765	13.0671	12.264	intron	ENSSSCG00000005739
1	306985626	306986478	4.27399	6.15796	6.11386	utr_3	ENSSSCG00000023173
1	306995477	306995717	8.014	8.93831	3.27279	utr_5	ENSSSCG00000023173
1	307039141	307039351	5.81778	5.04787	5.17453	intergenic	ENSSSCG00000021113
1	307039875	307040254	3.46746	4.58907	3.90586	intergenic	-
1	307093733	307093931	7.20305	5.24202	5.17765	intergenic	-
1	307111081	307111284	5.12867	3.85128	3.48834	CDS	ENSSSCG00000026425
1	307112681	307112892	2.68528	3.13874	3.951	CDS	ENSSSCG00000026425
1	307127362	307127760	4.98198	4.12566	3.90867	intron	ENSSSCG00000026425
1	307128723	307128958	2.64592	3.81655	3.4978	intergenic	ENSSSCG00000026425
1	307204229	307204461	7.52373	7.1634	6.24464	utr_3	ENSSSCG00000005740
1	307238487	307239275	7.67081	7.83731	3.79725	intron	ENSSSCG00000005740
1	307239656	307239810	7.26735	11.0665	5.76292	intron	ENSSSCG00000005740
1	307264515	307264827	5.86759	5.25329	4.3896	CDS	ENSSSCG00000005740
1	307276120	307276361	7.42475	7.60606	3.38177	utr_3	ENSSSCG00000005743
1	307276641	307277031	12.1421	15.8031	9.82979	utr_3	ENSSSCG00000005743
1	307277780	307278103	3.21912	3.29022	3.19734	utr_3	ENSSSCG00000005743
1	307448655	307449097	17.3317	18.6483	7.37981	utr_5	ENSSSCG00000005743
1	307475771	307476023	2.53294	2.41299	2.09404	utr_3	ENSSSCG00000005749
1	307477753	307478170	7.65908	5.83769	4.89083	utr_3	ENSSSCG00000005749
1	307481921	307482195	5.28157	3.99574	4.13147	CDS	ENSSSCG00000005749
1	307484665	307484925	5.55988	4.14239	3.81638	CDS	ENSSSCG00000005749
1	307490975	307491065	5.2501	4.95079	3.72452	CDS	ENSSSCG00000005749
1	307496060	307496239	7.7297	4.95934	4.098	TSS	ENSSSCG00000005749
1	307549169	307549371	3.25276	4.29751	2.13228	Stop	ENSSSCG00000024912
1	307549985	307550203	14.5873	17.619	12.264	utr_3	ENSSSCG00000024912
1	307851234	307851509	18.3716	22.628	7.96108	utr_5	ENSSSCG00000005750
1	308173950	308174208	2.93913	5.06213	3.03836	Stop	ENSSSCG00000005751
1	308175670	308175888	4.73071	5.2857	7.78214	intergenic	-
1	308352185	308352747	14.9701	39.3775	31.4443	Stop	ENSSSCG00000029715
1	308622226	308624269	9.54018	12.4295	11.6005	CDS	ENSSSCG00000005761
1	308638374	308638623	3.64035	3.76041	7.73619	Stop	ENSSSCG00000005759
1	308853115	308853430	8.84474	12.099	9.95383	Stop	ENSSSCG00000005753
1	308859625	308860081	8.18139	10.0181	7.76649	CDS	ENSSSCG00000005753
1	308860193	308860580	11.7525	15.0853	17.7431	CDS	ENSSSCG00000005753
1	308860912	308861453	11.7176	11.6416	15.2243	CDS	ENSSSCG00000005753
1	310005067	310005699	10.3464	16.4144	18.2534	CDS	ENSSSCG00000005774
1	310007146	310007461	4.16163	4.58677	11.7156	CDS	ENSSSCG00000005774
1	310068986	310069388	7.09334	10.2785	14.8532	Stop	ENSSSCG00000005773
1	311022224	311022416	2.99612	3.20345	2.39187	CDS	ENSSSCG00000005781
1	311333817	311334113	5.51293	8.06056	4.33407	CDS	ENSSSCG00000028791
1	311558910	311559556	26.2077	26.1587	30.2432	CDS	ENSSSCG00000005787
1	311581763	311581967	10.0437	7.60818	8.22357	Stop	ENSSSCG00000005787
1	311675803	311676016	13.6705	24.4627	12.7122	intergenic	-
1	311678270	311678492	15.4101	29.6076	19.6017	intergenic	-
1	313730012	313730228	66.0013	77.6109	56.8137	intron	ENSSSCG00000005828
1	313734198	313734397	2.76075	2.45546	2.97295	CDS	ENSSSCG00000005828
1	313734762	313735180	8.24798	10.2918	9.08424	intron	ENSSSCG00000005828
1	313736843	313737182	1.88807	2.22986	2.26828	utr_3	ENSSSCG00000005828
1	313755879	313756132	10.1197	14.3531	12.3455	intergenic	-
1	313757015	313757203	9.13392	12.7632	11.6551	intergenic	-
1	313758231	313758571	3.68052	3.02946	2.97421	Stop	ENSSSCG00000005840
1	313759841	313760033	21.1145	21.2177	13.1767	intergenic	-
1	313763846	313764254	8.86396	12.7556	9.58304	intergenic	-
1	313772458	313772828	4.63324	4.36003	3.00207	Stop	ENSSSCG00000005838
1	313774831	313775151	5.38844	5.3591	4.43625	CDS	ENSSSCG00000005838
1	313808217	313808460	1.65248	1.8132	1.35841	Stop	ENSSSCG00000005833
1	313849009	313849235	2.6039	3.53531	1.77238	intergenic	-
1	313854067	313854373	5.09641	7.41267	5.92755	intergenic	-
1	313854680	313855087	7.82594	13.4868	11.8586	intergenic	ENSSSCG00000005837
1	313890679	313890873	3.83782	6.0875	2.5945	intergenic	-
1	313920900	313921443	24.4035	21.7389	13.0823	Stop	ENSSSCG00000005841
1	313982107	313982320	6.18312	5.55404	3.3682	intergenic	-
1	314012261	314012571	9.58901	13.3507	10.6806	intergenic	-
1	314013459	314013865	6.0855	4.96403	2.13907	intron	ENSSSCG00000005853
1	314014155	314014551	7.17658	11.3577	6.10349	intron	ENSSSCG00000005853
1	314112255	314112516	5.36646	8.33104	6.72838	Stop	ENSSSCG00000005845
1	314112744	314113210	4.69432	7.6817	10.5009	CDS	ENSSSCG00000005845
1	314117532	314117749	3.28449	7.17524	4.86248	Stop	ENSSSCG00000005846
1	314125576	314125965	34.3159	54.4102	22.0489	utr_5	ENSSSCG00000005846
1	314136288	314136520	4.80349	6.84638	4.23061	CDS	ENSSSCG00000005849
1	314137556	314137753	4.82255	3.89181	3.46459	CDS	ENSSSCG00000005849
1	314164209	314164449	12.9795	12.4173	5.5705	intergenic	-
2	60035	60302	52.7294	19.5702	11.3371	intron	ENSSSCG00000012836
2	123993	124233	3.06035	2.65859	2.13908	utr_3	ENSSSCG00000012838
2	145757	145988	3.70894	2.98739	2.70379	CDS	ENSSSCG00000012840
2	168658	168883	20.9243	15.0465	19.2517	utr_5	ENSSSCG00000012843
2	181643	181862	4.12998	4.4823	3.19929	Stop	ENSSSCG00000012844
2	193783	194212	20.639	17.6425	11.5985	intron	ENSSSCG00000012846
2	198704	199195	10.0354	10.1002	8.82151	utr_3	ENSSSCG00000012846
2	199847	200038	9.89812	9.28274	5.13378	utr_3	ENSSSCG00000012846
2	222139	222373	4.4406	5.74783	3.45344	Stop	ENSSSCG00000012848
2	240589	241183	11.3684	19.7598	15.3069	utr_3	ENSSSCG00000012849
2	243649	243924	9.99132	12.8554	10.1669	intron	ENSSSCG00000012849
2	246482	246850	5.79679	6.18406	3.87443	TSS	ENSSSCG00000012850
2	269154	269364	3.2356	3.699	3.30292	Stop	ENSSSCG00000012850
2	297759	297989	6.86792	8.45106	4.03599	Stop	ENSSSCG00000012852
2	304800	306523	7.12543	7.00869	6.04009	CDS	ENSSSCG00000029723
2	306971	307367	4.58433	6.41811	6.32809	CDS	ENSSSCG00000029723
2	333707	333927	23.6334	22.9537	7.17895	TSS	ENSSSCG00000029723
2	343032	343361	6.15217	5.07914	5.3108	CDS	ENSSSCG00000012854
2	419864	420153	19.2503	11.6853	7.01616	intergenic	-
2	420456	420808	14.8562	18.0849	22.2463	intergenic	-
2	421094	421484	23.1214	24.4627	12.3678	intergenic	-
2	439950	440211	7.53275	7.92949	4.42788	utr_3	ENSSSCG00000012856
2	550001	550240	2.84969	5.70797	4.10702	intergenic	-
2	851384	851815	2.4119	3.42528	2.75957	intergenic	ENSSSCG00000021181
2	1237527	1237825	8.56559	9.06118	6.70705	intergenic	-
2	1238105	1238499	4.05497	6.03376	3.60458	intergenic	-
2	1388805	1389036	3.50941	4.74561	5.36077	Stop	ENSSSCG00000030888
2	1480196	1480498	7.5729	5.8529	6.16954	intergenic	-
2	1490364	1490551	4.845	5.09859	5.44808	intergenic	-
2	1567473	1567895	3.9953	5.29936	4.39918	TSS	ENSSSCG00000029328
2	2725653	2726088	9.73531	8.22043	8.73331	Stop	ENSSSCG00000012875
2	2750928	2751145	3.90587	4.43555	2.4891	intergenic	-
2	2755613	2755834	2.73918	4.54308	2.73801	CDS	ENSSSCG00000012878
2	2785316	2785532	10.7969	9.85309	8.17603	Stop	ENSSSCG00000012879
2	2872308	2872597	6.63998	7.96735	6.94813	utr_3	ENSSSCG00000012880
2	2974966	2975260	9.36087	8.85932	4.52447	utr_3	ENSSSCG00000012884
2	3368710	3368913	3.14526	3.04944	2.12572	intergenic	-
2	3401127	3401384	2.50285	2.91055	2.16675	intergenic	-
2	3416355	3416869	4.24334	4.68036	2.81673	TSS	ENSSSCG00000012889
2	3473288	3474100	4.82576	7.11608	6.85165	intergenic	ENSSSCG00000012889
2	3550011	3550623	6.43767	7.01939	6.44628	Stop	ENSSSCG00000012893
2	3601966	3602241	2.57531	2.81853	1.83433	CDS	ENSSSCG00000012896
2	3744114	3744398	3.57764	3.84705	3.7226	utr_5	ENSSSCG00000012902
2	3760447	3760645	2.25339	4.22274	2.9947	Stop	ENSSSCG00000012903
2	3781372	3781548	5.18923	14.8524	4.76708	utr_3	ENSSSCG00000012905
2	3806442	3807075	8.02711	8.7201	6.64468	Stop	ENSSSCG00000012909
2	3807356	3807612	2.50005	2.54299	2.67578	Stop	ENSSSCG00000012910
2	3816288	3816994	3.65573	5.10938	5.75098	CDS	ENSSSCG00000012911
2	3817886	3818141	4.58277	4.86761	3.66623	CDS	ENSSSCG00000012911
2	3819351	3819542	3.1347	3.03357	2.60449	CDS	ENSSSCG00000012911
2	3819750	3819968	4.07073	5.16921	3.69934	CDS	ENSSSCG00000012911
2	3831126	3831441	4.82362	5.65457	8.31181	Stop	ENSSSCG00000012912
2	3838701	3838901	6.25736	5.72113	4.07511	TSS	ENSSSCG00000012913
2	3838701	3838901	6.25736	5.72113	4.07511	utr_3	ENSSSCG00000012914
2	3944801	3945015	3.50544	2.01947	1.80132	intron	ENSSSCG00000012916
2	3946116	3946380	4.55199	5.74843	6.44842	utr_3	ENSSSCG00000012916
2	3969112	3969346	4.08442	2.64462	3.55942	Stop	ENSSSCG00000027956
2	4021692	4021904	4.73689	7.30968	5.85976	utr_3	ENSSSCG00000029637
2	4028705	4028982	8.00355	6.2725	5.72203	CDS	ENSSSCG00000029637
2	4047002	4047233	10.436	13.2448	12.0501	CDS	ENSSSCG00000029637
2	4238220	4238420	2.42434	2.55111	3.39301	Stop	ENSSSCG00000022726
2	4448239	4448740	18.0367	11.1655	7.48313	intergenic	-
2	4578094	4578411	4.50428	3.58827	3.39196	CDS	ENSSSCG00000012925
2	4578357	4578665	2.33365	2.2057	1.88668	CDS	ENSSSCG00000012925
2	4609531	4609762	2.4579	2.42702	3.3505	Stop	ENSSSCG00000012926
2	4874469	4874693	2.76905	2.93067	1.47298	Stop	ENSSSCG00000012934
2	5120403	5120571	7.06195	5.46993	8.71675	CDS	ENSSSCG00000012940
2	5125983	5126176	7.0515	12.4497	7.27285	intron	ENSSSCG00000012939
2	5149212	5149409	8.53711	14.1243	14.3318	Stop	ENSSSCG00000029949
2	5349088	5349287	8.81023	7.61341	5.41899	intergenic	-
2	5461380	5461669	14.6762	11.2048	9.83972	CDS	ENSSSCG00000012963
2	5470380	5470877	14.3282	12.9303	12.0331	CDS	ENSSSCG00000012963
2	5471920	5472236	4.32973	3.39937	2.28168	CDS	ENSSSCG00000012963
2	5476585	5477053	18.1276	17.7408	13.1196	CDS	ENSSSCG00000012963
2	5514215	5514557	9.24372	7.6423	7.03999	CDS	ENSSSCG00000012965
2	5515387	5515758	17.6723	18.849	10.6795	intergenic	ENSSSCG00000012965
2	5515939	5516148	12.9329	17.4562	7.01106	TSS	ENSSSCG00000012966
2	5516771	5516949	3.84324	4.30114	3.91145	CDS	ENSSSCG00000012966
2	5517362	5517739	2.501	3.75556	4.57921	Stop	ENSSSCG00000012966
2	5540785	5541744	10.6969	13.0009	12.9556	CDS	ENSSSCG00000012968
2	5540785	5541744	10.6969	13.0009	12.9556	utr_3	ENSSSCG00000012967
2	5566823	5567026	32.4327	17.4734	24.528	Stop	ENSSSCG00000012971
2	5566823	5567026	32.4327	17.4734	24.528	utr_3	ENSSSCG00000012973
2	5653147	5653752	5.49054	10.5026	9.53415	CDS	ENSSSCG00000012978
2	5653902	5654124	5.09356	12.1828	8.90633	CDS	ENSSSCG00000012978
2	5654787	5655342	9.48569	11.3334	12.7643	Stop	ENSSSCG00000012978
2	5667530	5667873	7.16424	7.55724	4.43502	Stop	ENSSSCG00000012979
2	5667530	5667873	7.16424	7.55724	4.43502	utr_3	ENSSSCG00000012979
2	5667530	5667873	7.16424	7.55724	4.43502	utr_3	ENSSSCG00000012980
2	5668603	5668847	2.48767	3.12505	3.19216	Stop	ENSSSCG00000012980
2	5699398	5699848	2.37192	4.37411	3.59639	intergenic	-
2	5707710	5708116	2.48265	3.23444	1.6825	nc_exon	ENSSSCG00000012981
2	5762255	5762565	4.71135	5.01895	3.65588	CDS	ENSSSCG00000012982
2	5767652	5767985	5.77136	4.74452	5.64715	CDS	ENSSSCG00000012982
2	5771840	5772067	7.53273	9.54045	9.741	Stop	ENSSSCG00000012983
2	5788870	5789698	8.07958	9.5148	9.94669	CDS	ENSSSCG00000012983
2	5808003	5808185	3.23857	2.94583	3.39422	intergenic	-
2	5830475	5830717	4.67551	8.22388	3.51974	TSS	ENSSSCG00000012984
2	5843595	5843844	8.62082	7.94623	8.15365	Stop	ENSSSCG00000012984
2	5843595	5843844	8.62082	7.94623	8.15365	utr_3	ENSSSCG00000012985
2	5865173	5865488	8.9367	7.53944	6.04911	utr_5	ENSSSCG00000012988
2	5871853	5872070	21.5221	32.1075	9.19802	CDS	ENSSSCG00000012988
2	5874034	5874318	4.69303	9.95454	7.57483	CDS	ENSSSCG00000012988
2	5880960	5881193	3.58225	3.79856	4.58618	intergenic	-
2	5886812	5887016	1.84134	2.51043	2.51936	intergenic	-
2	5905112	5905419	13.7379	12.2538	6.49579	utr_3	ENSSSCG00000020737
2	5931450	5931651	8.72842	11.1393	12.5136	intergenic	-
2	5943067	5943499	5.62483	6.23429	7.3182	intergenic	-
2	5943763	5944024	4.89691	4.27792	3.12351	intergenic	-
2	5944254	5944910	5.04985	4.87352	3.43847	intergenic	-
2	5957103	5957366	11.9687	10.4046	8.70511	Stop	ENSSSCG00000012992
2	6030313	6030538	9.10822	16.4125	17.8969	utr_3	ENSSSCG00000012996
2	6030704	6030938	14.9459	19.2207	24.3466	Stop	ENSSSCG00000012996
2	6155261	6155471	9.9241	33.6363	10.9093	TSS	ENSSSCG00000012999
2	6199555	6199749	3.31272	3.61117	2.55548	Stop	ENSSSCG00000013001
2	6199555	6199749	3.31272	3.61117	2.55548	utr_3	ENSSSCG00000013001
2	6199555	6199749	3.31272	3.61117	2.55548	utr_3	ENSSSCG00000027057
2	6207757	6208018	6.36916	4.83879	3.84227	CDS	ENSSSCG00000013003
2	6216672	6217005	2.11158	3.03578	1.77151	CDS	ENSSSCG00000013005
2	6226616	6226851	6.12385	6.05744	5.18726	TSS	ENSSSCG00000013005
2	6231429	6231670	2.94384	4.07049	2.0468	Stop	ENSSSCG00000013007
2	6270554	6270766	10.1724	8.19905	5.76124	Stop	ENSSSCG00000013011
2	6305602	6305835	6.10292	4.43075	3.17805	intergenic	-
2	6306638	6306851	25.9081	34.0003	41.4505	intergenic	-
2	6386741	6386940	4.3831	4.13706	4.85996	TSS	ENSSSCG00000013016
2	6387437	6387683	3.42066	2.83943	1.91868	intergenic	-
2	6413284	6413791	5.94516	6.28646	10.7161	Stop	ENSSSCG00000023890
2	6428338	6428597	6.08707	8.57284	4.84857	intergenic	-
2	6452208	6452900	4.51499	4.82498	4.91272	Stop	ENSSSCG00000013017
2	6496250	6496501	6.15249	7.42619	4.76041	CDS	ENSSSCG00000013019
2	6524012	6524401	8.83005	8.40265	3.66698	intron	ENSSSCG00000013021
2	6536180	6536335	3.54281	2.91223	3.85783	Stop	ENSSSCG00000013021
2	6869903	6870301	5.27933	3.668	2.86921	Stop	ENSSSCG00000013028
2	6870789	6870992	4.88234	3.62978	3.5366	CDS	ENSSSCG00000013028
2	6871991	6872290	4.16207	4.2095	3.09157	intron	ENSSSCG00000013028
2	6876798	6876989	2.95195	2.74307	2.84243	CDS	ENSSSCG00000013028
2	6878428	6878645	4.88292	5.63105	2.71269	utr_5	ENSSSCG00000013028
2	6896467	6896752	3.69493	4.12777	4.11588	intergenic	-
2	6912132	6912340	7.24303	5.54442	13.5345	Stop	ENSSSCG00000013034
2	6932087	6932569	8.16698	8.23557	4.6309	TSS	ENSSSCG00000013035
2	6935767	6936077	4.40457	3.77196	2.99738	Stop	ENSSSCG00000013036
2	6937010	6937611	35.9534	30.9923	20.2629	intergenic	-
2	6939764	6939986	2.84986	3.15491	3.80645	utr_3	ENSSSCG00000013037
2	6942689	6942841	7.30448	5.72739	1.28344	intron	ENSSSCG00000013037
2	6998356	6998579	16.1416	114.451	29.0914	CDS	ENSSSCG00000013042
2	6998356	6998579	16.1416	114.451	29.0914	intron	ENSSSCG00000013042
2	6998356	6998579	16.1416	114.451	29.0914	intron	ENSSSCG00000021620
2	7054804	7055152	8.00501	8.47532	7.09263	CDS	ENSSSCG00000013043
2	7348164	7348574	14.8222	17.1933	17.9444	intergenic	-
2	7349007	7349218	3.24582	4.03611	2.81732	intergenic	-
2	7452952	7453199	12.7575	13.2361	5.96563	intergenic	-
2	7554698	7555225	19.2969	24.962	34.7956	Stop	ENSSSCG00000013053
2	8045725	8045895	1.83762	2.3255	2.87723	TSS	ENSSSCG00000025413
2	8265815	8266025	1.78679	3.13272	2.54494	TSS	ENSSSCG00000022404
2	8283031	8283242	8.45938	10.8044	6.36376	TSS	ENSSSCG00000026293
2	8283573	8283778	3.74176	3.05784	3.06601	intron	ENSSSCG00000026293
2	8321717	8321946	2.87196	2.82793	2.84069	intron	ENSSSCG00000022866
2	8322572	8322835	10.7013	15.3516	6.34966	intron	ENSSSCG00000022866
2	8331751	8331997	5.76581	6.51281	7.75414	CDS	ENSSSCG00000020665
2	8331751	8331997	5.76581	6.51281	7.75414	utr_3	ENSSSCG00000020665
2	8331751	8331997	5.76581	6.51281	7.75414	utr_3	ENSSSCG00000021431
2	8365442	8365656	23.1562	30.2872	33.0843	Stop	ENSSSCG00000025351
2	8380323	8381079	19.1172	15.1448	14.5707	CDS	ENSSSCG00000028542
2	8382864	8383068	9.78392	8.29371	6.67763	CDS	ENSSSCG00000028542
2	8391642	8391840	2.02595	1.81528	1.76682	Stop	ENSSSCG00000028542
2	8392156	8392372	3.14802	3.34491	2.3316	intergenic	-
2	8401675	8401911	8.29362	12.3902	4.12934	intron	ENSSSCG00000020823
2	8412598	8412779	4.44917	5.50412	3.55762	nc_exon	ENSSSCG00000024917
2	8419674	8419999	5.69505	4.50984	6.00801	CDS	ENSSSCG00000023110
2	8423449	8424187	4.64413	5.23288	4.31084	Stop	ENSSSCG00000024995
2	8443605	8443748	4.27786	3.40731	6.23387	CDS	ENSSSCG00000028275
2	8444056	8444288	5.91653	6.5525	12.5492	CDS	ENSSSCG00000028275
2	8444436	8444563	4.06529	7.25146	9.73278	CDS	ENSSSCG00000028275
2	8445015	8445275	3.7863	5.01738	6.18388	CDS	ENSSSCG00000028275
2	8445923	8446103	4.77566	4.54308	5.27638	Stop	ENSSSCG00000028275
2	8465283	8465497	2.94172	3.88503	2.54699	TSS	ENSSSCG00000020809
2	8468536	8468732	5.71763	5.20402	4.03369	CDS	ENSSSCG00000020809
2	8470478	8470695	4.77416	6.10504	4.22629	utr_3	ENSSSCG00000020809
2	8473173	8473632	2.61216	2.68653	1.58162	utr_5	ENSSSCG00000013061
2	8479318	8479523	11.8653	7.42623	10.8121	intron	ENSSSCG00000013061
2	8483671	8483954	5.2523	6.14929	5.65011	intergenic	-
2	8491947	8492174	6.78877	4.88227	3.60265	Stop	ENSSSCG00000013062
2	8503058	8503316	8.28603	8.02482	16.4281	CDS	ENSSSCG00000013063
2	8505953	8506489	9.15672	8.86377	8.94134	CDS	ENSSSCG00000013063
2	8544112	8544629	4.0513	5.68742	6.93509	intergenic	-
2	8545144	8545452	5.64575	7.33882	7.22532	CDS	ENSSSCG00000027969
2	8584825	8585248	2.95502	2.60032	2.61331	intergenic	-
2	8586133	8586391	3.64238	4.36834	4.95258	intergenic	-
2	8587025	8587201	2.75154	4.29553	5.09099	intergenic	-
2	8587629	8587816	2.62935	3.51409	4.04355	intergenic	-
2	8651234	8651520	18.8963	16.7635	15.8681	utr_3	ENSSSCG00000013065
2	8651800	8651995	3.55713	3.53911	3.54474	Stop	ENSSSCG00000013065
2	9119313	9119601	29.1509	22.5918	13.4391	TSS	ENSSSCG00000013072
2	9153170	9153559	12.8406	10.2649	8.14356	intergenic	-
2	9235029	9235247	18.804	24.8267	23.4442	intergenic	-
2	9244527	9245175	3.97769	4.24529	5.5787	CDS	ENSSSCG00000028696
2	9245378	9245625	4.72986	6.47163	6.91085	intergenic	ENSSSCG00000028696
2	9710774	9711011	7.26338	7.79369	5.06647	intron	ENSSSCG00000013087
2	9712140	9712428	5.76943	5.41677	4.71147	CDS	ENSSSCG00000013087
2	9749191	9749380	2.35257	2.50644	1.62051	intergenic	-
2	9753884	9754262	1.7368	2.17724	1.08058	intergenic	ENSSSCG00000013093
2	9785692	9786046	5.45889	6.24962	6.74588	Stop	ENSSSCG00000013093
2	10168971	10169176	3.93687	4.55228	4.06424	Stop	ENSSSCG00000028762
2	10351552	10351808	4.79357	12.0858	6.84504	Stop	ENSSSCG00000013113
2	10351552	10351808	4.79357	12.0858	6.84504	utr_3	ENSSSCG00000013114
2	10365807	10366455	19.2876	16.3309	5.89433	utr_5	ENSSSCG00000013114
2	10374193	10374391	3.59588	3.5125	2.04329	Stop	ENSSSCG00000013110
2	10457118	10457422	7.28833	5.70144	4.32516	utr_3	ENSSSCG00000013107
2	11089168	11089445	5.27863	6.01453	7.37472	CDS	ENSSSCG00000013118
2	11349998	11350439	14.8563	13.5188	6.60595	TSS	ENSSSCG00000013125
2	11383310	11383734	6.29172	6.17923	6.22976	Stop	ENSSSCG00000013125
2	11383947	11384250	3.78227	4.247	5.38456	utr_3	ENSSSCG00000013125
2	11809366	11809619	1.96506	4.36834	3.89787	Stop	ENSSSCG00000013144
2	11815547	11815734	11.5316	10.7753	16.1144	Stop	ENSSSCG00000013145
2	11850028	11850362	38.6403	23.8803	8.55629	utr_5	ENSSSCG00000013145
2	11865490	11865687	4.66942	4.74278	3.42252	intergenic	-
2	11996862	11997102	5.32202	5.84523	6.1131	intergenic	ENSSSCG00000022597
2	12030353	12030546	1.77586	2.64279	2.7779	Stop	ENSSSCG00000013153
2	12137930	12138249	13.673	16.5997	15.6796	Stop	ENSSSCG00000013155
2	12791238	12791630	2.71064	2.67738	2.29579	Stop	ENSSSCG00000013174
2	12812172	12812350	3.1539	4.78169	3.88859	CDS	ENSSSCG00000013174
2	12882377	12882577	2.16929	2.00944	2.18411	Stop	ENSSSCG00000013177
2	12885072	12885270	4.43596	3.81238	3.31881	utr_3	ENSSSCG00000013178
2	12903317	12903970	10.5709	12.2556	13.0789	intergenic	-
2	12909005	12909198	11.4665	14.0879	8.47073	intergenic	-
2	12915762	12916344	3.34788	3.69629	3.93795	CDS	ENSSSCG00000013179
2	12971651	12971832	1.53933	1.83112	2.00693	intron	ENSSSCG00000013181
2	12987338	12987541	49.1721	21.6961	16.257	intergenic	ENSSSCG00000023379
2	13381477	13381719	4.73322	8.54255	6.36374	intergenic	-
2	13382830	13383035	13.4439	16.425	5.98943	intron	ENSSSCG00000029059
2	13405211	13405410	34.9436	41.0625	18.4816	intron	ENSSSCG00000028527
2	13406993	13407243	8.1007	7.23398	8.27728	intron	ENSSSCG00000028527
2	13407938	13409986	10.0843	10.2507	10.1629	CDS	ENSSSCG00000028527
2	13417418	13417658	3.1558	4.85599	2.40928	intron	ENSSSCG00000028527
2	15632726	15633235	3.61902	3.59174	2.00887	utr_3	ENSSSCG00000023709
2	15635712	15635897	3.8003	4.27872	5.81828	Stop	ENSSSCG00000023709
2	16218969	16219801	5.95391	7.15954	7.96394	CDS	ENSSSCG00000013227
2	16226355	16226555	3.38593	3.63447	6.34172	TSS	ENSSSCG00000013226
2	16240290	16240491	7.05253	8.10571	4.48768	intergenic	-
2	16312145	16312400	16.6697	9.07859	7.65563	intergenic	-
2	16407740	16407983	12.7406	14.3427	6.77061	CDS	ENSSSCG00000013238
2	16409430	16409631	16.0885	32.6752	7.04878	utr_5	ENSSSCG00000013238
2	16451902	16452333	4.15018	4.25018	3.58296	Stop	ENSSSCG00000013237
2	16548030	16548239	3.75847	3.40453	3.30028	CDS	ENSSSCG00000013241
2	16549649	16549887	3.64083	3.63336	2.50496	TSS	ENSSSCG00000013241
2	16608936	16609188	7.79314	7.12123	6.94375	CDS	ENSSSCG00000013244
2	17180551	17180793	4.85443	8.22452	6.76724	Stop	ENSSSCG00000023097
2	17181636	17181869	2.53184	4.27127	3.51501	CDS	ENSSSCG00000023097
2	17463606	17464233	6.33541	6.73329	5.02513	Stop	ENSSSCG00000013262
2	17478122	17478358	4.83423	3.48037	3.10561	CDS	ENSSSCG00000013260
2	17478728	17479039	26.7219	30.7909	14.8442	TSS	ENSSSCG00000013260
2	17480304	17480868	7.21146	7.79203	7.16293	utr_3	ENSSSCG00000013259
2	17507954	17508195	5.6162	8.17244	1.74873	intron	ENSSSCG00000013259
2	17972997	17973380	16.6796	14.8524	15.2944	Stop	ENSSSCG00000023974
2	18179789	18180011	19.9943	24.962	25.0107	CDS	ENSSSCG00000013273
2	18195011	18195226	6.57621	6.40691	2.94717	intergenic	-
2	18667017	18667180	12.5546	13.105	18.9665	intron	ENSSSCG00000013276
2	18921032	18921252	12.7406	32.3258	9.98234	intergenic	-
2	18924080	18924895	8.07307	4.85531	4.70596	intergenic	-
2	19263540	19263859	5.45869	7.21189	5.34937	utr_3	ENSSSCG00000029521
2	19376603	19376808	5.55913	6.21122	5.51703	intergenic	-
2	19709254	19709680	4.12613	5.30872	6.90207	Stop	ENSSSCG00000013281
2	19876913	19877186	2.79725	4.65016	3.66384	intron	ENSSSCG00000013282
2	19877894	19878192	2.00873	3.00457	3.89173	intergenic	-
2	19985421	19986059	3.47871	3.77068	2.8109	intergenic	-
2	26786671	26786939	10.6714	8.7367	15.8292	Stop	ENSSSCG00000013291
2	27737047	27737846	13.6172	9.12872	7.20838	CDS	ENSSSCG00000013295
2	27783804	27784042	4.53896	7.60818	11.551	intergenic	-
2	27785279	27785911	4.95397	5.73538	4.03749	CDS	ENSSSCG00000025588
2	27862709	27862943	25.2486	33.8545	78.7179	intergenic	-
2	27953967	27954160	4.34179	4.05999	3.94425	CDS	ENSSSCG00000028338
2	27954540	27954779	3.24059	4.25271	5.98941	utr_3	ENSSSCG00000028338
2	28157005	28157197	3.30865	4.36835	3.85033	Stop	ENSSSCG00000013297
2	28855085	28855294	9.69492	6.51892	25.0577	intergenic	-
2	28946605	28947266	6.30466	8.87228	6.01193	utr_5	ENSSSCG00000013303
2	29154039	29154242	5.28157	5.0236	6.76354	Stop	ENSSSCG00000013304
2	29412105	29412630	6.06	6.30423	4.38166	intron	ENSSSCG00000013307
2	29421869	29422394	8.4932	9.3631	11.0494	Stop	ENSSSCG00000013307
2	30149655	30149842	5.05671	5.86084	4.85876	CDS	ENSSSCG00000013312
2	30185916	30186195	3.65478	4.39442	2.18477	intergenic	-
2	30480852	30481052	7.25376	5.88271	5.43576	CDS	ENSSSCG00000013314
2	30530777	30531212	8.06389	7.48524	4.40261	utr_5	ENSSSCG00000013314
2	31202419	31202664	5.16625	5.32074	7.3687	intron	ENSSSCG00000013318
2	31202419	31202664	5.16625	5.32074	7.3687	intron	ENSSSCG00000024950
2	31202419	31202664	5.16625	5.32074	7.3687	Stop	ENSSSCG00000013318
2	31214247	31214468	2.00296	2.5391	1.49068	intron	ENSSSCG00000013318
2	31214247	31214468	2.00296	2.5391	1.49068	intron	ENSSSCG00000024950
2	31214247	31214468	2.00296	2.5391	1.49068	utr_5	ENSSSCG00000013318
2	34619350	34619578	22.5982	16.8493	11.2454	CDS	ENSSSCG00000013331
2	35455101	35455656	13.8565	14.1156	8.56891	utr_5	ENSSSCG00000013335
2	35611957	35612419	3.89977	3.80261	5.30993	Stop	ENSSSCG00000013335
2	40059527	40059731	4.6526	4.90015	4.12536	intergenic	-
2	40096137	40096687	3.58376	4.60892	5.14475	intergenic	-
2	41963568	41963778	13.6435	10.329	9.00663	TSS	ENSSSCG00000013349
2	42204147	42204362	1.27748	1.60939	2.0063	utr_3	ENSSSCG00000013351
2	43606294	43606544	9.96395	6.71137	9.80409	CDS	ENSSSCG00000013361
2	43801826	43802033	12.7906	12.5226	6.76724	utr_5	ENSSSCG00000021729
2	43963694	43963936	3.46559	3.87691	2.00462	utr_5	ENSSSCG00000013368
2	44061457	44061874	4.69144	10.099	18.7338	intergenic	-
2	44064518	44064723	18.4831	15.3932	24.4609	intergenic	-
2	45076371	45076585	11.7176	8.6396	16.428	intron	ENSSSCG00000025406
2	47651653	47651968	5.25856	6.10201	7.21076	Stop	ENSSSCG00000021819
2	47819029	47819455	13.896	25.065	14.8615	intergenic	-
2	50100987	50101187	4.93464	7.50328	3.7409	intergenic	-
2	50766125	50766372	4.15496	5.46666	5.25601	Stop	ENSSSCG00000013402
2	50780570	50781166	8.0415	8.56196	7.68941	CDS	ENSSSCG00000013402
2	51975434	51976777	4.88232	5.37752	6.8911	CDS	ENSSSCG00000013404
2	52047756	52048128	1.51221	2.04227	2.52696	Stop	ENSSSCG00000013406
2	52576718	52577102	3.44996	5.10159	4.92723	Stop	ENSSSCG00000013408
2	53040073	53040325	7.18399	7.44123	8.65693	intergenic	-
2	53243247	53243503	5.55749	7.72862	4.6041	CDS	ENSSSCG00000013411
2	53870998	53871549	11.0262	8.52531	5.14475	CDS	ENSSSCG00000013991
2	53892198	53892487	4.91865	3.47936	2.96619	intron	ENSSSCG00000013992
2	54412766	54413010	3.85515	4.98387	6.79317	intergenic	ENSSSCG00000013983
2	55199775	55199940	6.63998	4.84159	14.1179	utr_5	ENSSSCG00000013978
2	55235138	55235515	7.01281	8.83115	7.2477	CDS	ENSSSCG00000025900
2	58023243	58023650	19.4895	14.1131	18.7017	Stop	ENSSSCG00000013939
2	58278998	58279359	6.66041	9.8045	10.9844	utr_3	ENSSSCG00000013938
2	58560184	58560428	6.03816	5.93125	4.14488	intergenic	-
2	58560877	58561134	3.8765	6.33164	4.67744	intergenic	-
2	58712758	58712957	14.8981	10.4112	10.0231	intergenic	-
2	58921456	58921706	18.2739	40.48	21.7575	CDS	ENSSSCG00000013913
2	59044347	59044804	6.77229	7.16957	5.76463	CDS	ENSSSCG00000013905
2	59045986	59046219	21.3787	19.0335	10.7239	intron	ENSSSCG00000013905
2	59149168	59149377	2.31684	4.14992	5.93981	utr_3	ENSSSCG00000013896
2	59149168	59149377	2.31684	4.14992	5.93981	utr_3	ENSSSCG00000013896
2	59149168	59149377	2.31684	4.14992	5.93981	utr_3	ENSSSCG00000013897
2	59192812	59193092	5.37692	6.88852	5.28045	Stop	ENSSSCG00000029924
2	59395602	59395857	7.125	5.93821	5.6653	TSS	ENSSSCG00000013891
2	59505394	59505618	6.91412	14.1131	8.07713	Stop	ENSSSCG00000013886
2	59505795	59505992	5.89098	7.82504	9.17856	CDS	ENSSSCG00000013886
2	59589910	59590116	7.23383	7.28058	6.52417	CDS	ENSSSCG00000013884
2	59591268	59591548	4.08639	3.9024	5.05936	CDS	ENSSSCG00000013884
2	59809531	59809749	3.91583	4.88607	5.58019	Stop	ENSSSCG00000013883
2	59993481	59993712	2.63048	3.66943	6.20331	utr_5	ENSSSCG00000013870
2	60062473	60062617	3.12763	3.30475	3.27152	CDS	ENSSSCG00000013876
2	60062886	60063139	2.44553	2.20213	3.87885	CDS	ENSSSCG00000013876
2	60076697	60077001	4.22178	4.65957	5.2788	Stop	ENSSSCG00000013876
2	60077321	60077843	4.04087	4.51395	5.79926	utr_3	ENSSSCG00000013876
2	60095362	60095684	3.88407	5.36561	4.35139	utr_3	ENSSSCG00000013873
2	60097896	60098170	6.26969	6.36532	3.76007	CDS	ENSSSCG00000013873
2	60106627	60106994	6.61315	7.41257	4.57889	CDS	ENSSSCG00000013873
2	60107704	60107971	7.51989	9.11625	3.51698	intergenic	-
2	60315958	60316154	4.18486	5.86277	7.35839	Stop	ENSSSCG00000013867
2	60322307	60322533	4.7528	4.92165	14.4235	CDS	ENSSSCG00000013867
2	60518093	60518336	3.45706	2.54158	1.64281	utr_3	ENSSSCG00000013864
2	60619927	60620109	6.94687	9.02792	4.22467	CDS	ENSSSCG00000013862
2	60620471	60620681	4.09676	5.67885	5.98941	CDS	ENSSSCG00000013862
2	60620836	60621079	18.8319	21.5922	17.7238	Stop	ENSSSCG00000013862
2	60623459	60623893	27.6201	23.0976	28.8632	utr_3	ENSSSCG00000013862
2	60624387	60624608	9.69904	8.07268	5.45066	TSS	ENSSSCG00000013861
2	60641160	60642011	6.79391	9.56624	9.83974	utr_3	ENSSSCG00000013861
2	60664543	60664888	5.32524	6.48633	5.88052	intergenic	ENSSSCG00000013860
2	60904157	60904425	3.81613	4.82418	3.95819	intergenic	-
2	61021828	61022070	3.96238	4.9924	2.63721	utr_3	ENSSSCG00000013855
2	61156548	61156836	3.03953	2.90862	2.4879	TSS	ENSSSCG00000013849
2	61195297	61195493	2.67216	3.52827	3.90287	Stop	ENSSSCG00000013848
2	61524813	61525028	3.02802	3.31182	2.48766	intron	ENSSSCG00000027013
2	61524813	61525028	3.02802	3.31182	2.48766	intron	ENSSSCG00000027903
2	61570156	61570754	2.91593	4.06948	5.04398	CDS	ENSSSCG00000025560
2	61751071	61751277	5.07416	5.46748	4.79604	CDS	ENSSSCG00000013836
2	61796925	61797192	5.36148	6.26859	3.72275	Stop	ENSSSCG00000013838
2	61802972	61803160	2.55276	1.79214	2.44887	CDS	ENSSSCG00000013837
2	61826670	61826870	10.8806	11.8819	16.0431	intergenic	-
2	61827172	61827431	22.9857	18.6073	8.07595	intergenic	-
2	61922249	61922468	2.18025	2.13121	2.80869	utr_3	ENSSSCG00000022227
2	62008957	62009362	8.87189	14.0322	15.9657	Stop	ENSSSCG00000013829
2	62008957	62009362	8.87189	14.0322	15.9657	utr_3	ENSSSCG00000013829
2	62008957	62009362	8.87189	14.0322	15.9657	utr_3	ENSSSCG00000013830
2	62012193	62012478	2.80385	5.27699	2.4077	CDS	ENSSSCG00000013829
2	62014735	62014945	4.82169	9.93799	3.50532	TSS	ENSSSCG00000013829
2	62051552	62051752	5.35179	6.42146	2.91792	intergenic	-
2	65115336	65115536	2.46906	3.13188	3.44446	utr_3	ENSSSCG00000013775
2	65115336	65115536	2.46906	3.13188	3.44446	utr_3	ENSSSCG00000013776
2	65180086	65180322	4.76007	4.79079	2.90369	TSS	ENSSSCG00000013784
2	65206476	65206733	5.36579	4.65479	4.04212	CDS	ENSSSCG00000013779
2	65350518	65350871	22.6926	20.0805	8.72084	TSS	ENSSSCG00000013771
2	65383418	65383694	6.37577	7.32538	7.85782	CDS	ENSSSCG00000013768
2	65383418	65383694	6.37577	7.32538	7.85782	nc_exon	ENSSSCG00000029473
2	65399298	65400792	13.5233	8.32664	7.61864	CDS	ENSSSCG00000013767
2	65525935	65526159	30.0429	18.7609	12.1927	TSS	ENSSSCG00000013761
2	65683431	65683680	5.14493	6.55252	5.98942	Stop	ENSSSCG00000013755
2	66210328	66211299	2.72522	3.21688	2.9343	intergenic	ENSSSCG00000013753
2	66215056	66215257	7.70277	7.2682	7.15617	CDS	ENSSSCG00000013752
2	66257017	66257380	10.7876	11.6635	9.3747	CDS	ENSSSCG00000013751
2	66276994	66277205	8.09075	4.12108	4.67427	intron	ENSSSCG00000013745
2	66286765	66287123	6.90068	4.98	4.63948	Stop	ENSSSCG00000013746
2	66296246	66296520	4.92638	5.84686	6.29784	Stop	ENSSSCG00000013748
2	66322259	66322716	25.8104	27.7588	16.4965	intergenic	-
2	66419535	66419785	34.1166	36.4172	10.3597	intergenic	-
2	66505196	66505525	5.74256	6.20803	5.12504	utr_5	ENSSSCG00000013735
2	66505671	66505994	3.57232	3.52828	2.66467	utr_5	ENSSSCG00000013735
2	66506372	66506788	6.47008	9.1266	10.7537	Stop	ENSSSCG00000013735
2	66515964	66516162	3.54482	6.04288	3.22287	utr_5	ENSSSCG00000013737
2	66641341	66641594	5.94147	8.02558	6.34758	TSS	ENSSSCG00000013728
2	66643033	66643459	3.46033	3.30564	2.31583	CDS	ENSSSCG00000013727
2	66645701	66645899	3.71605	4.72577	5.23551	Stop	ENSSSCG00000013727
2	66651493	66651861	18.2656	10.484	8.78448	intergenic	-
2	66666017	66666338	7.95123	8.38073	3.99294	utr_3	ENSSSCG00000013726
2	66686918	66687154	6.74808	7.37017	2.82663	Stop	ENSSSCG00000013722
2	66722974	66723279	4.83967	5.4943	3.38829	CDS	ENSSSCG00000013720
2	68607582	68608037	7.92661	8.12513	3.17805	intergenic	-
2	68614033	68614303	13.967	9.82875	16.257	intergenic	-
2	68886121	68886526	2.98881	3.39857	3.8143	intron	ENSSSCG00000013671
2	68887564	68887776	1.33798	1.95536	2.8132	intron	ENSSSCG00000013671
2	68899370	68899578	9.0672	18.2014	23.102	intron	ENSSSCG00000013671
2	68921062	68921265	2.91121	5.64525	6.69623	Stop	ENSSSCG00000013670
2	68921539	68921762	4.72643	7.4808	8.31184	CDS	ENSSSCG00000013670
2	69135266	69135494	15.7703	16.5997	5.95519	TSS	ENSSSCG00000027434
2	69271135	69271399	2.7713	2.3179	2.13336	CDS	ENSSSCG00000013664
2	69278176	69278457	4.82906	4.78266	3.86691	CDS	ENSSSCG00000013663
2	69286170	69286374	3.37675	3.22586	4.27815	intergenic	-
2	69290165	69290498	5.61702	4.08952	2.89748	CDS	ENSSSCG00000013662
2	69401571	69401783	2.71042	3.28073	2.3102	utr_5	ENSSSCG00000013656
2	69459210	69459405	3.24824	4.83248	5.5686	Stop	ENSSSCG00000013651
2	69463617	69463814	59.518	30.3601	13.7851	intron	ENSSSCG00000013651
2	69517651	69517879	12.7115	7.11414	9.60936	intergenic	ENSSSCG00000013648
2	69540258	69540633	8.78987	6.14814	6.16582	CDS	ENSSSCG00000013647
2	69648290	69648511	4.73071	5.84267	6.27461	CDS	ENSSSCG00000028460
2	69648290	69648511	4.73071	5.84267	6.27461	intron	ENSSSCG00000013641
2	69706060	69706337	15.4317	18.1454	9.53868	utr_5	ENSSSCG00000013645
2	69782914	69783170	10.6875	13.8993	7.70069	intergenic	-
2	69798492	69798683	5.17401	6.89228	16.6848	intergenic	-
2	70007317	70007571	4.95983	7.86303	7.18731	intergenic	ENSSSCG00000013631
2	70036979	70037233	14.1436	12.5423	5.17327	TSS	ENSSSCG00000013633
2	70079016	70079255	5.803	6.55804	4.85823	intergenic	-
2	70084686	70085379	6.13627	7.95263	5.36947	CDS	ENSSSCG00000013635
2	70085502	70085662	2.16851	3.02144	3.55414	Stop	ENSSSCG00000013635
2	70389003	70389204	2.08389	3.13065	2.59449	Stop	ENSSSCG00000013623
2	70424893	70425152	3.0509	3.2151	3.66698	Stop	ENSSSCG00000013619
2	70489623	70489827	3.21573	5.30922	6.5298	intergenic	ENSSSCG00000013616
2	70507300	70507520	8.86568	76.0092	9.95642	TSS	ENSSSCG00000013616
2	70511569	70511765	3.11389	5.96551	4.10702	CDS	ENSSSCG00000013615
2	71183451	71183942	3.86283	4.33642	4.91989	CDS	ENSSSCG00000013602
2	71225002	71225290	6.18852	5.2693	5.54808	TSS	ENSSSCG00000013602
2	71251669	71251974	1.8457	2.25822	2.59146	utr_3	ENSSSCG00000013600
2	71262691	71262919	7.11426	5.034	8.05718	TSS	ENSSSCG00000013600
2	71272567	71272945	4.64	4.84438	5.42602	Stop	ENSSSCG00000013599
2	71311163	71311839	7.63737	6.53457	8.402	CDS	ENSSSCG00000013598
2	71405348	71405589	3.30765	3.5611	4.19019	Stop	ENSSSCG00000013595
2	71607497	71607715	4.59928	6.48806	2.89691	TSS	ENSSSCG00000013592
2	71687833	71688012	3.72155	4.14992	4.37065	Stop	ENSSSCG00000013591
2	71699508	71700086	13.9848	11.3265	6.97963	intron	ENSSSCG00000013588
2	71700624	71700833	3.1619	4.7292	3.70347	intron	ENSSSCG00000013588
2	71708297	71708495	3.92229	4.52718	2.56689	TSS	ENSSSCG00000013588
2	71774315	71774562	6.80993	9.00968	8.32811	Stop	ENSSSCG00000013585
2	71896625	71896993	9.56079	12.8524	15.2039	CDS	ENSSSCG00000013583
2	71898818	71899077	9.57213	7.11644	5.79926	intron	ENSSSCG00000013583
2	71968679	71968946	3.72082	2.98055	3.90517	CDS	ENSSSCG00000013578
2	71969764	71969961	8.03243	8.86613	4.88213	intron	ENSSSCG00000013578
2	72155230	72155436	3.2195	3.3591	4.74129	nc_exon	ENSSSCG00000025078
2	72158188	72158485	15.0097	17.063	6.64292	intergenic	-
2	72174533	72174748	3.69383	3.30848	3.15698	Stop	ENSSSCG00000013569
2	72176912	72177108	2.21551	3.25086	3.68806	intergenic	-
2	72177852	72178199	4.00176	5.32266	7.78842	intergenic	-
2	72180115	72180375	4.29644	4.76547	4.05812	CDS	ENSSSCG00000013568
2	72420038	72420351	4.86429	4.11873	4.54892	Stop	ENSSSCG00000013564
2	72420945	72421150	2.6244	3.24506	4.44113	utr_3	ENSSSCG00000013564
2	72421679	72421984	4.71859	7.84405	8.55629	utr_3	ENSSSCG00000013564
2	73169905	73170445	26.0991	28.9457	11.7099	intron	ENSSSCG00000013538
2	73180137	73180381	5.71394	5.24202	3.37409	intergenic	-
2	73210442	73210791	7.80058	7.89215	8.81066	CDS	ENSSSCG00000013539
2	73217012	73217244	3.18995	3.30867	2.6949	TSS	ENSSSCG00000024254
2	73220799	73221035	4.47598	9.79656	7.99098	intergenic	-
2	73400832	73401027	3.21123	3.35817	5.00212	CDS	ENSSSCG00000013534
2	73410660	73410969	4.18486	4.59715	3.1373	intergenic	-
2	73685318	73685520	6.46751	6.11569	10.7809	Stop	ENSSSCG00000013531
2	73691374	73691624	4.36421	3.64029	5.32391	intergenic	-
2	73828756	73828995	4.58294	3.72206	3.58812	CDS	ENSSSCG00000013522
2	73905340	73905544	4.99083	6.46887	4.22549	TSS	ENSSSCG00000013523
2	73933032	73933359	7.64837	5.61304	6.88928	CDS	ENSSSCG00000013523
2	74436501	74436703	20.7814	13.9787	19.6795	TSS	ENSSSCG00000024570
2	74456607	74457023	2.17038	2.35662	2.16628	Stop	ENSSSCG00000024570
2	74787355	74788229	9.93329	11.6357	8.96061	intergenic	-
2	74794456	74794778	4.25311	4.77549	5.9993	CDS	ENSSSCG00000013514
2	74805706	74806087	6.7167	10.1189	8.15525	Stop	ENSSSCG00000013513
2	74815289	74815491	7.45666	18.6383	9.2408	CDS	ENSSSCG00000013512
2	74817138	74817366	3.83853	4.56996	6.84504	CDS	ENSSSCG00000013512
2	74825062	74825225	4.55881	4.29556	3.7187	Stop	ENSSSCG00000013511
2	74829658	74830004	22.0047	14.1933	13.4049	CDS	ENSSSCG00000013511
2	74907441	74907659	8.21137	12.1003	6.81211	TSS	ENSSSCG00000013508
2	74948355	74948785	17.4621	18.4516	11.2778	TSS	ENSSSCG00000013507
2	75040984	75041213	12.1361	10.2656	19.3943	CDS	ENSSSCG00000013497
2	75072708	75072952	5.20579	4.93578	4.93031	Stop	ENSSSCG00000013501
2	75170915	75171144	3.83833	3.68563	1.80966	utr_5	ENSSSCG00000027127
2	75223235	75223421	10.109	7.50218	5.12019	intergenic	-
2	75232809	75233005	4.1377	4.31696	3.54877	TSS	ENSSSCG00000029236
2	75233235	75234041	10.0638	14.2635	11.4489	CDS	ENSSSCG00000029236
2	75238709	75239108	5.99393	6.32748	6.85012	Stop	ENSSSCG00000029236
2	75243110	75243394	15.1536	23.0897	10.2676	intergenic	-
2	75247034	75247307	5.31411	6.60851	5.52867	utr_3	ENSSSCG00000022066
2	75247441	75247798	12.2971	10.0808	5.3049	Stop	ENSSSCG00000022066
2	75268549	75268885	3.29016	4.28	6.59339	CDS	ENSSSCG00000022066
2	75300553	75300752	2.4083	2.71193	2.66211	utr_3	ENSSSCG00000025675
2	75318191	75318438	5.34934	11.4921	7.79575	intergenic	-
2	75517538	75517948	5.2891	10.0373	8.4053	intergenic	ENSSSCG00000024242
2	75665694	75665902	7.57082	4.62634	4.87199	intergenic	-
2	75666447	75666676	3.62142	3.9663	3.52482	intergenic	-
2	75708806	75709476	10.1849	12.5581	12.4673	intergenic	-
2	75712983	75713171	3.03953	3.10303	2.13129	intergenic	-
2	75730835	75731324	9.87627	17.1531	16.5739	Stop	ENSSSCG00000013478
2	75812414	75812627	4.99981	6.70635	6.02231	nc_exon	ENSSSCG00000013472
2	75892915	75893237	5.61966	5.67885	3.96835	intergenic	-
2	75893582	75893974	6.11504	9.08362	9.83575	utr_3	ENSSSCG00000013475
2	75908970	75909166	5.02183	7.01118	2.83956	utr_5	ENSSSCG00000013475
2	76070823	76071217	16.664	15.8007	8.60053	utr_5	ENSSSCG00000029279
2	76088589	76088919	3.99057	5.15961	5.23529	utr_3	ENSSSCG00000029279
2	76089251	76089655	3.96995	5.84915	4.2634	utr_3	ENSSSCG00000029279
2	76370132	76370430	3.3024	4.06855	3.35267	Stop	ENSSSCG00000013468
2	76379403	76379662	4.99083	4.789	3.81144	intron	ENSSSCG00000013468
2	76408183	76408398	7.12355	8.21722	4.98405	utr_3	ENSSSCG00000013467
2	76659490	76659954	7.93451	8.51828	10.6954	utr_3	ENSSSCG00000022689
2	76698444	76698646	3.25658	2.83942	2.26886	TSS	ENSSSCG00000022757
2	76699155	76699478	5.35098	6.39572	5.07892	utr_3	ENSSSCG00000022757
2	76783171	76783453	5.54976	8.44546	6.30867	Stop	ENSSSCG00000013464
2	76959619	76959856	7.63008	4.62074	5.3198	intergenic	-
2	77007019	77007318	4.69408	7.34072	6.97501	intergenic	ENSSSCG00000013455
2	77009804	77010009	5.53995	5.45382	3.08638	TSS	ENSSSCG00000013455
2	77057675	77057900	9.70891	5.74783	8.61332	CDS	ENSSSCG00000013457
2	77148896	77149140	4.21674	5.88778	6.15516	Stop	ENSSSCG00000013442
2	77149743	77149993	6.99118	6.42404	7.80762	intron	ENSSSCG00000013442
2	77150458	77150638	7.11426	5.44759	5.39047	intron	ENSSSCG00000013442
2	77151669	77152030	16.2244	11.5449	6.84501	intron	ENSSSCG00000013442
2	77153635	77153855	5.07325	5.51033	3.63782	utr_5	ENSSSCG00000013442
2	77157062	77157294	14.5813	18.3197	10.0154	intron	ENSSSCG00000013442
2	77165550	77165801	3.93183	4.46821	5.36196	intergenic	ENSSSCG00000025631
2	77246749	77247173	3.13569	3.53035	1.46819	intergenic	-
2	77263882	77264106	4.57252	4.14992	3.39971	Stop	ENSSSCG00000013444
2	77279469	77280037	4.28096	4.46847	3.94393	utr_3	ENSSSCG00000013445
2	77288093	77288336	7.10783	7.18351	4.89499	TSS	ENSSSCG00000013445
2	77482250	77482503	15.1585	19.3177	37.6475	intron	ENSSSCG00000029130
2	77491940	77492136	3.65478	4.87239	6.63112	intergenic	-
2	77511405	77511606	8.5092	6.3275	8.61529	intron	ENSSSCG00000013419
2	77518104	77518325	3.33952	3.5537	1.42604	intron	ENSSSCG00000013419
2	77595577	77595914	7.42894	5.04195	4.8074	intron	ENSSSCG00000027779
2	77595577	77595914	7.42894	5.04195	4.8074	intron	ENSSSCG00000029635
2	77595577	77595914	7.42894	5.04195	4.8074	utr_3	ENSSSCG00000027779
2	77603812	77604002	5.3639	6.03827	3.75373	utr_5	ENSSSCG00000027779
2	77650021	77650216	11.0719	5.33497	8.96374	CDS	ENSSSCG00000027565
2	77654709	77654936	8.35363	4.6159	5.59827	Stop	ENSSSCG00000027565
2	77655082	77655352	7.91637	5.15745	6.63113	utr_3	ENSSSCG00000027565
2	77655932	77656161	4.74779	5.56023	3.50612	Stop	ENSSSCG00000021472
2	77677817	77678018	2.21333	2.07497	1.18278	Stop	ENSSSCG00000030042
2	77784348	77784564	9.85285	10.5231	6.69475	intron	ENSSSCG00000013431
2	77822723	77822941	5.17339	6.29898	5.46925	intergenic	-
2	77835398	77835645	4.71494	6.0283	4.07002	intron	ENSSSCG00000013427
2	77836816	77837153	19.4103	19.573	12.3954	CDS	ENSSSCG00000013427
2	77844066	77844355	2.48438	2.60396	3.48941	Stop	ENSSSCG00000028040
2	77891323	77891506	3.90587	4.32466	3.21717	TSS	ENSSSCG00000022265
2	77893894	77894546	5.10841	7.36379	6.87892	Stop	ENSSSCG00000022265
2	77937124	77937344	6.89663	8.50675	4.48187	intron	ENSSSCG00000023248
2	77962532	77962846	19.6489	20.8807	9.00788	TSS	ENSSSCG00000022528
2	77965960	77966166	5.25721	7.6203	10.1359	intergenic	-
2	77968097	77968369	8.19535	11.445	9.23042	intergenic	-
2	77969125	77969369	4.04789	6.75416	4.31888	intron	ENSSSCG00000023142
2	77983021	77983398	4.20477	4.41829	6.28703	intergenic	-
2	77989485	77989668	2.84571	4.11873	4.2425	CDS	ENSSSCG00000013426
2	77997888	77998257	5.80137	10.6856	16.4281	CDS	ENSSSCG00000013426
2	78003294	78003532	7.69109	13.8622	3.09537	intergenic	-
2	78143108	78144095	7.92134	12.5032	9.24173	CDS	ENSSSCG00000019211
2	78143108	78144095	7.92134	12.5032	9.24173	CDS	ENSSSCG00000021750
2	78150137	78150342	6.11243	5.11214	3.06086	TSS	ENSSSCG00000021750
2	78156411	78157299	3.16764	4.58963	4.31548	intergenic	ENSSSCG00000013435
2	78157561	78158055	4.94841	4.82693	5.00332	Stop	ENSSSCG00000013435
2	78165504	78165840	30.2744	38.7757	20.9629	intron	ENSSSCG00000013435
2	78333528	78333744	8.96491	36.4558	6.30722	utr_5	ENSSSCG00000013424
2	79502117	79502342	4.46098	4.14433	3.06601	Stop	ENSSSCG00000014007
2	79635155	79635472	25.9461	25.937	20.8203	intergenic	-
2	79823464	79823665	27.5155	25.0795	8.21965	intergenic	ENSSSCG00000026972
2	80290320	80291251	5.18799	8.09953	7.02841	Stop	ENSSSCG00000014014
2	80296507	80296775	7.75594	9.28274	4.37322	intergenic	-
2	80387475	80387760	6.50978	8.57785	7.81733	Stop	ENSSSCG00000014019
2	80388056	80388333	3.63246	5.55037	5.29422	CDS	ENSSSCG00000014019
2	80405984	80406243	7.28658	5.40087	7.27284	CDS	ENSSSCG00000014019
2	80442956	80443164	10.444	12.8362	3.0085	utr_5	ENSSSCG00000014019
2	80588363	80588563	8.25959	8.60016	5.25181	TSS	ENSSSCG00000014023
2	81122027	81122283	12.2635	12.9303	19.2041	utr_3	ENSSSCG00000029380
2	81810285	81810591	4.31106	5.55487	3.82645	utr_5	ENSSSCG00000014031
2	81845139	81845360	8.44581	20.2192	9.89322	Stop	ENSSSCG00000014033
2	81860891	81861121	3.87797	4.41277	4.2476	CDS	ENSSSCG00000014038
2	81860891	81861121	3.87797	4.41277	4.2476	intron	ENSSSCG00000014033
2	81861475	81861594	1.93825	2.03327	2.83243	CDS	ENSSSCG00000014038
2	81861475	81861594	1.93825	2.03327	2.83243	intron	ENSSSCG00000014033
2	81890680	81890885	12.2158	10.7689	5.43935	intron	ENSSSCG00000014033
2	81890680	81890885	12.2158	10.7689	5.43935	TSS	ENSSSCG00000014038
2	81922377	81922603	6.27383	4.10052	3.07663	intron	ENSSSCG00000014033
2	81922377	81922603	6.27383	4.10052	3.07663	utr_3	ENSSSCG00000014036
2	81937179	81937818	11.4857	15.0681	12.1975	intron	ENSSSCG00000014033
2	81937179	81937818	11.4857	15.0681	12.1975	utr_3	ENSSSCG00000014035
2	82031560	82031757	43.5225	14.3531	21.8186	intron	ENSSSCG00000014033
2	82031560	82031757	43.5225	14.3531	21.8186	Stop	ENSSSCG00000014034
2	82212763	82213001	3.36283	5.99516	6.76483	CDS	ENSSSCG00000014044
2	82213262	82214177	4.23574	4.42697	7.29983	CDS	ENSSSCG00000014044
2	82220191	82220378	4.87895	7.24302	7.05893	Stop	ENSSSCG00000014043
2	82221887	82222155	5.19853	4.28311	2.6915	utr_5	ENSSSCG00000014043
2	82260605	82260826	3.16908	3.2754	2.59888	intergenic	ENSSSCG00000014040
2	82273330	82273522	3.39041	4.07131	2.15155	TSS	ENSSSCG00000014040
2	82292851	82293105	2.07105	4.05998	3.26695	Stop	ENSSSCG00000014039
2	82380477	82380681	21.7613	58.9727	32.5139	CDS	ENSSSCG00000014045
2	83003655	83003849	4.74286	6.42265	6.45286	utr_3	ENSSSCG00000014057
2	83006419	83006670	4.26332	6.90808	6.0283	Stop	ENSSSCG00000014057
2	83066605	83066934	4.10436	4.5743	3.32053	CDS	ENSSSCG00000014058
2	83150160	83150403	5.55045	7.98784	12.2233	utr_3	ENSSSCG00000029985
2	83156744	83156965	20.9243	9.85998	7.98587	intron	ENSSSCG00000029985
2	83999234	83999621	8.16047	14.1196	11.4567	CDS	ENSSSCG00000014066
2	84211974	84212189	12.6103	34.7282	21.6759	Stop	ENSSSCG00000014068
2	84269472	84269688	15.9374	12.1934	14.7432	intron	ENSSSCG00000014071
2	85273184	85273424	7.53275	7.93583	12.264	intergenic	-
2	85278298	85278487	12.0763	7.74654	7.70065	Stop	ENSSSCG00000014072
2	85989681	85989888	5.00303	6.92769	5.93907	utr_3	ENSSSCG00000014080
2	86174014	86174445	3.68381	3.67773	3.41342	utr_5	ENSSSCG00000014082
2	86916833	86917259	16.4998	18.3938	8.47818	utr_5	ENSSSCG00000014087
2	87280829	87281244	9.73462	9.45666	13.6748	utr_3	ENSSSCG00000020672
2	87283221	87283487	16.4552	7.65541	12.9949	CDS	ENSSSCG00000020672
2	87564821	87565285	5.76034	7.84246	6.47331	intergenic	-
2	87565860	87566047	2.99217	4.61795	2.31816	TSS	ENSSSCG00000014095
2	88972515	88972709	10.5002	10.4355	10.5528	utr_3	ENSSSCG00000028536
2	89746581	89747027	11.0708	9.76454	8.11135	intergenic	-
2	90084699	90085436	10.5099	8.80875	5.41203	intergenic	-
2	97400264	97400842	15.4705	17.5586	11.086	TSS	ENSSSCG00000014146
2	100771048	100771292	6.86317	6.45829	8.94941	CDS	ENSSSCG00000024193
2	101571418	101571962	10.612	13.1196	12.0668	utr_3	ENSSSCG00000014156
2	103838402	103838764	5.89494	6.01678	6.12868	intergenic	-
2	103838963	103839570	11.1521	10.3885	4.63207	CDS	ENSSSCG00000014157
2	103847945	103848527	15.2405	17.4512	19.9484	Stop	ENSSSCG00000014157
2	106219985	106220195	3.11813	4.50484	3.50273	intergenic	ENSSSCG00000029805
2	106277669	106277876	8.32049	6.08446	9.41192	intergenic	-
2	106416441	106416643	3.48328	4.94701	3.22426	CDS	ENSSSCG00000014168
2	106474995	106475258	13.1029	11.8622	7.08951	TSS	ENSSSCG00000014168
2	107641421	107641659	4.73211	4.95079	5.81827	CDS	ENSSSCG00000014175
2	108921206	108921432	13.81	19.096	37.4338	CDS	ENSSSCG00000014176
2	108970518	108970718	8.84799	7.135	5.38543	Stop	ENSSSCG00000014177
2	110536922	110537154	5.02184	9.84028	4.54833	CDS	ENSSSCG00000014179
2	110737486	110737714	18.5329	9.17353	30.2322	Stop	ENSSSCG00000014180
2	112821608	112821820	4.33704	7.98784	14.5457	CDS	ENSSSCG00000024089
2	117935829	117936087	5.02185	6.3341	2.66467	CDS	ENSSSCG00000014190
2	119133730	119134402	8.24334	9.54689	6.15984	utr_5	ENSSSCG00000014195
2	120041380	120041636	4.3215	5.38291	5.81117	Stop	ENSSSCG00000014197
2	121358571	121358771	13.1405	30.8697	37.9331	intergenic	-
2	121515621	121515820	2.27615	2.50869	2.08774	Stop	ENSSSCG00000026230
2	121578944	121579296	9.42081	5.8168	7.79315	nc_exon	ENSSSCG00000024866
2	123503201	123503437	2.87112	2.96824	2.2773	CDS	ENSSSCG00000014213
2	123612383	123612482	1.46814	1.80829	1.6364	Stop	ENSSSCG00000014213
2	124204391	124204608	10.5219	11.3577	11.9788	Stop	ENSSSCG00000014215
2	124598803	124598990	12.1581	7.20777	4.35593	intergenic	-
2	124599832	124600412	3.84324	4.4213	6.0211	intergenic	-
2	124611184	124611694	14.62	22.8498	23.1509	Stop	ENSSSCG00000014216
2	124628842	124629336	21.0101	24.7386	35.8957	Stop	ENSSSCG00000014217
2	124629494	124630167	11.5876	15.8406	16.607	CDS	ENSSSCG00000014217
2	124682224	124682427	4.39088	4.48036	4.58726	Stop	ENSSSCG00000014218
2	124851310	124851506	6.45662	6.18652	7.32863	TSS	ENSSSCG00000014220
2	125468575	125469652	7.84008	7.99064	7.70066	CDS	ENSSSCG00000014224
2	128460875	128461063	21.2033	14.2283	13.2623	CDS	ENSSSCG00000027857
2	128722479	128722759	11.1736	14.9069	16.6847	Stop	ENSSSCG00000014227
2	129695832	129696116	3.73554	4.99449	3.48556	intergenic	-
2	129849208	129849535	5.96774	7.49899	7.7417	CDS	ENSSSCG00000014229
2	131666837	131666998	2.37592	2.49253	2.35876	utr_3	ENSSSCG00000025977
2	132183932	132184144	6.63137	9.45839	6.45999	Stop	ENSSSCG00000014239
2	133297347	133297567	9.73931	16.6968	34.439	CDS	ENSSSCG00000014242
2	133299138	133299292	6.27729	3.88298	7.95735	CDS	ENSSSCG00000014242
2	135014243	135014442	3.73515	2.52393	3.48086	CDS	ENSSSCG00000014244
2	135853860	135854165	3.43373	5.62675	5.44491	Stop	ENSSSCG00000014252
2	137198453	137198670	3.88531	5.17481	2.34721	TSS	ENSSSCG00000014258
2	139034625	139034827	9.45778	16.425	7.59371	CDS	ENSSSCG00000014267
2	139885716	139885939	12.6834	12.481	9.66861	TSS	ENSSSCG00000020915
2	140218473	140218718	5.92321	5.13923	8.66322	intergenic	-
2	140230382	140230625	7.5708	10.4476	8.92925	Stop	ENSSSCG00000014277
2	140267443	140267669	11.885	14.1772	14.7901	intergenic	-
2	140572807	140573006	14.8563	17.7422	4.30574	intergenic	-
2	140618901	140619199	10.5688	16.3376	17.0859	CDS	ENSSSCG00000014287
2	140620174	140620546	7.742	6.32127	7.28441	CDS	ENSSSCG00000014287
2	140620754	140620978	4.5454	6.83253	5.17453	CDS	ENSSSCG00000014287
2	140650069	140650444	5.95086	6.19511	6.98145	CDS	ENSSSCG00000014288
2	140650574	140650911	7.65501	9.21447	10.7118	CDS	ENSSSCG00000014288
2	140654317	140654801	3.61545	3.74991	3.51759	intergenic	-
2	140664347	140664574	4.01632	4.43642	4.73269	intergenic	-
2	140674775	140674978	6.11633	6.90993	10.6954	intron	ENSSSCG00000014291
2	140768254	140768528	4.63126	5.71631	7.53769	CDS	ENSSSCG00000014291
2	140803979	140804191	10.308	10.0472	4.69299	TSS	ENSSSCG00000014291
2	141864728	141865010	5.6776	6.38926	5.9181	CDS	ENSSSCG00000014295
2	142044481	142044671	2.63968	3.08515	4.48187	Stop	ENSSSCG00000030680
2	142257182	142257403	3.52543	3.37904	2.44106	intron	ENSSSCG00000014300
2	142257182	142257403	3.52543	3.37904	2.44106	intron	ENSSSCG00000014302
2	142257182	142257403	3.52543	3.37904	2.44106	utr_5	ENSSSCG00000014300
2	142441730	142442384	6.31291	11.9222	10.5528	CDS	ENSSSCG00000014303
2	142444122	142444445	14.8923	18.2567	20.1851	utr_3	ENSSSCG00000014303
2	142510482	142510694	4.72527	4.24354	5.24661	CDS	ENSSSCG00000014304
2	142573728	142573926	3.68268	4.25914	2.35876	TSS	ENSSSCG00000014306
2	142575703	142575961	5.26595	6.28299	4.96636	CDS	ENSSSCG00000014306
2	142660906	142661326	7.22166	7.48499	8.79397	CDS	ENSSSCG00000030393
2	142662964	142663220	12.1039	12.0025	12.7841	intergenic	-
2	142676796	142676979	5.14738	4.9924	5.29421	utr_5	ENSSSCG00000026106
2	142687307	142687657	8.35917	7.55017	6.12471	CDS	ENSSSCG00000026106
2	142694741	142695133	5.59688	5.74277	6.95912	Stop	ENSSSCG00000026106
2	142698899	142699221	10.3226	14.569	9.49214	intergenic	-
2	145356315	145356645	6.62881	5.85873	5.98941	intergenic	-
2	145357101	145357343	3.6142	4.46031	3.58295	intergenic	-
2	145357634	145357834	10.0437	26.5698	12.0929	utr_3	ENSSSCG00000014321
2	145502808	145504025	9.17348	8.81612	5.75079	CDS	ENSSSCG00000014322
2	145887712	145887947	4.89876	4.69285	9.50699	CDS	ENSSSCG00000014327
2	146045579	146045776	16.8122	17.4006	6.4707	CDS	ENSSSCG00000014331
2	146082154	146082342	6.01382	8.56196	4.02146	CDS	ENSSSCG00000014331
2	146087199	146087508	4.82096	5.13281	6.2146	CDS	ENSSSCG00000014331
2	146114722	146114909	2.41245	3.89511	2.8645	intergenic	-
2	146158555	146158892	7.79283	9.00624	11.9202	Stop	ENSSSCG00000014336
2	146218916	146219100	5.12389	8.18072	5.58194	intron	ENSSSCG00000014337
2	146629763	146630047	8.35265	11.618	14.6954	intergenic	-
2	147108419	147108625	6.13779	7.11417	2.7808	intron	ENSSSCG00000029239
2	147195774	147196028	13.7503	21.5796	29.5191	intergenic	-
2	147228793	147229072	8.25404	8.23919	3.4502	intergenic	-
2	147318099	147318621	3.19135	3.83071	3.43001	CDS	ENSSSCG00000014357
2	147318810	147318995	3.77509	3.5238	5.09099	Stop	ENSSSCG00000014357
2	147405171	147405463	9.13375	11.0947	5.07023	intergenic	-
2	147794690	147794918	9.67166	7.01503	5.00212	intergenic	-
2	147800801	147801333	17.0318	16.0017	7.80605	TSS	ENSSSCG00000021989
2	147801926	147802238	8.00353	6.37543	5.64307	intergenic	ENSSSCG00000021989
2	148109881	148110209	9.24474	9.81353	6.57766	TSS	ENSSSCG00000014364
2	148231523	148231773	5.29223	4.6161	3.80608	CDS	ENSSSCG00000014364
2	148264176	148264412	10.1421	8.05024	9.14867	intergenic	ENSSSCG00000014366
2	148266998	148267675	3.97649	4.86894	6.97224	TSS	ENSSSCG00000014367
2	148292310	148292906	3.29717	4.37235	4.6883	nc_exon	ENSSSCG00000014369
2	148315286	148315629	9.15397	6.25064	5.34768	CDS	ENSSSCG00000014372
2	148328253	148328635	10.6231	13.8114	11.0811	Stop	ENSSSCG00000014372
2	148331921	148332127	5.65954	5.97306	3.69142	Stop	ENSSSCG00000014375
2	148353706	148353906	8.78819	7.65214	5.67826	intergenic	-
2	149149811	149150163	5.19294	5.28452	6.48222	Stop	ENSSSCG00000028168
2	149150867	149151295	10.4726	11.2829	12.552	intergenic	ENSSSCG00000028168
2	149360679	149360902	3.05495	2.54989	2.39259	intergenic	-
2	149473442	149473702	22.0357	30.193	10.429	TSS	ENSSSCG00000014387
2	149679188	149679454	3.98473	4.39955	3.77903	intergenic	-
2	149680323	149680511	15.1213	13.9787	9.41192	intergenic	-
2	149682023	149682255	5.06368	6.62533	3.05582	intergenic	-
2	149682515	149682877	4.37294	5.77151	6.09006	intergenic	-
2	149690594	149690931	2.5013	2.87465	2.45993	Stop	ENSSSCG00000022289
2	149691852	149692088	3.1698	3.01186	2.34368	CDS	ENSSSCG00000022289
2	149692305	149692925	3.63529	6.03045	8.09995	CDS	ENSSSCG00000022289
2	149695884	149696113	9.85766	10.0554	21.0304	CDS	ENSSSCG00000022289
2	149746926	149747121	2.03265	3.84695	3.20212	utr_3	ENSSSCG00000014396
2	149752410	149752926	12.6592	17.0825	11.3008	Stop	ENSSSCG00000014395
2	149762862	149763062	3.22234	5.77966	5.92359	CDS	ENSSSCG00000014395
2	149764919	149765270	12.9484	10.7337	12.7204	CDS	ENSSSCG00000014395
2	149776577	149776807	2.33616	2.64015	2.33252	intron	ENSSSCG00000014394
2	150063032	150063218	6.64928	6.11569	9.59524	intergenic	-
2	150065409	150066235	5.22006	8.77641	6.20079	intergenic	ENSSSCG00000014397
2	150066502	150066718	3.0689	5.46043	5.1032	CDS	ENSSSCG00000014397
2	151154923	151155261	3.882	4.93677	5.16587	CDS	ENSSSCG00000014401
2	151155471	151155825	5.9198	7.33882	9.02202	CDS	ENSSSCG00000014401
2	151158338	151158542	9.08711	11.0665	6.69407	TSS	ENSSSCG00000014401
2	156394120	156394739	9.21532	11.2017	16.2035	CDS	ENSSSCG00000014427
2	157031289	157031556	5.91223	4.31538	2.72119	intergenic	-
2	157186152	157186277	6.43274	4.02251	5.08191	intergenic	-
2	157282644	157282876	8.31571	12.9151	9.46714	Stop	ENSSSCG00000014432
2	157307171	157307390	6.17765	11.3577	7.29802	Stop	ENSSSCG00000014434
2	157347048	157347343	7.5726	11.8237	9.81457	intergenic	-
2	157380531	157380735	6.37386	6.82598	6.47229	intergenic	-
2	157380874	157381212	5.2697	5.0217	5.10633	intergenic	-
2	157428079	157428300	6.56052	6.47764	4.30381	utr_5	ENSSSCG00000014435
2	157501621	157501830	15.1416	6.55252	6.50278	intergenic	ENSSSCG00000014436
2	157503018	157503219	4.76609	7.18351	10.1359	intergenic	-
2	157810601	157810817	4.51965	4.80518	4.31535	CDS	ENSSSCG00000014440
2	158113572	158113781	10.4023	15.4084	11.9075	utr_3	ENSSSCG00000022741
2	158114165	158114385	5.99196	6.36531	13.0358	utr_3	ENSSSCG00000022741
2	158453451	158453787	12.5038	18.7215	14.9894	CDS	ENSSSCG00000014450
2	158464806	158465186	6.72194	4.69891	5.54685	intron	ENSSSCG00000014450
2	158473203	158473643	8.10817	6.46515	6.77921	intron	ENSSSCG00000014450
2	159692568	159692847	5.04645	8.01494	15.1161	CDS	ENSSSCG00000014539
2	159733837	159734152	4.5817	6.70933	6.495	intergenic	-
2	159750937	159751324	1.9535	2.34312	2.87774	CDS	ENSSSCG00000014538
2	159751467	159752143	6.81066	9.27177	10.719	CDS	ENSSSCG00000014538
2	162096843	162097051	7.78924	8.88938	6.8667	utr_3	ENSSSCG00000014565
2	162183951	162184170	2.14789	2.59412	3.1183	Stop	ENSSSCG00000014558
2	162185823	162186160	7.95481	13.2599	15.9505	utr_3	ENSSSCG00000014558
2	162191510	162191698	2.67366	4.93203	3.74707	CDS	ENSSSCG00000014557
2	162311487	162311704	4.00291	3.43226	2.14746	CDS	ENSSSCG00000025023
2	162334741	162334979	5.12694	4.56478	3.91144	intergenic	-
2	162353044	162353240	1.52177	2.49308	2.77225	intergenic	-
3	93438	94094	6.07588	9.42426	9.69117	intergenic	-
3	120413	120919	7.15658	11.6027	10.0628	intergenic	ENSSSCG00000020813
3	121070	121373	7.21269	8.56354	5.69382	intergenic	-
3	152554	152777	8.40608	17.7464	24.691	intergenic	-
3	333630	333826	3.45251	4.56106	2.61495	intergenic	-
3	726092	726525	3.56488	5.48303	5.66484	intron	ENSSSCG00000007546
3	726892	727131	3.61692	3.05786	2.9234	intron	ENSSSCG00000007546
3	729059	729274	3.43948	4.17724	3.11272	intron	ENSSSCG00000007546
3	730434	730735	3.28242	3.44064	6.07947	intron	ENSSSCG00000007546
3	732051	732328	5.26348	7.77566	8.65938	intron	ENSSSCG00000007546
3	733101	733308	12.1919	18.0974	4.44927	intron	ENSSSCG00000007546
3	734761	734981	19.0411	19.6576	10.6954	intron	ENSSSCG00000007546
3	742508	742719	4.79584	5.1054	4.36245	Stop	ENSSSCG00000007546
3	762437	763011	8.2096	7.15505	5.96133	intergenic	ENSSSCG00000007550
3	763335	763601	6.92827	8.89554	8.35884	intergenic	-
3	809468	810057	3.16813	4.38503	4.23422	Stop	ENSSSCG00000007551
3	810321	810709	4.69955	8.17246	8.93279	intergenic	-
3	810921	811632	9.24433	9.12755	11.3479	intergenic	-
3	873778	873989	4.05611	4.05383	1.79406	utr_3	ENSSSCG00000007554
3	1138012	1138226	16.8702	24.0489	8.86745	intergenic	-
3	1147160	1147660	3.82883	3.70183	3.6792	Stop	ENSSSCG00000007559
3	1147952	1148994	16.5882	16.2228	8.74756	intergenic	-
3	1149661	1149885	4.28948	4.80518	3.31556	intergenic	-
3	1150133	1150387	14.5075	9.30912	9.06965	intergenic	-
3	1150947	1151194	5.39203	4.07129	3.77729	intergenic	-
3	1151624	1151867	5.13342	4.71252	3.78132	intergenic	-
3	1151999	1152706	14.5326	19.0759	18.7243	intergenic	ENSSSCG00000007560
3	2018219	2018654	5.01371	6.29645	4.3382	Stop	ENSSSCG00000023433
3	2019275	2019553	4.26332	3.89571	5.93479	utr_3	ENSSSCG00000023433
3	2019828	2020296	2.65398	6.45544	4.86688	utr_3	ENSSSCG00000023433
3	2110311	2110560	10.8208	11.2657	18.6683	Stop	ENSSSCG00000007563
3	2110732	2110937	4.22891	11.7548	31.5156	CDS	ENSSSCG00000007563
3	2173740	2173971	10.3656	11.2828	4.50257	intergenic	ENSSSCG00000007565
3	2198186	2198522	7.61001	12.8567	13.2716	intergenic	-
3	2199870	2200263	2.38439	2.64749	2.25096	intergenic	-
3	2285261	2285574	8.06537	10.0808	45.0633	Stop	ENSSSCG00000007567
3	4263705	4264556	10.8583	13.8843	11.7432	intergenic	ENSSSCG00000007576
3	4289482	4289702	4.33905	5.05809	2.7808	Stop	ENSSSCG00000007577
3	4517328	4517724	9.25939	10.5265	14.0035	Stop	ENSSSCG00000007580
3	4565895	4566091	2.53748	2.41209	2.13907	intergenic	-
3	4570001	4570741	7.90251	9.13849	7.88399	CDS	ENSSSCG00000022553
3	4594511	4595137	4.61251	6.58016	4.85671	intron	ENSSSCG00000022553
3	4608813	4608937	9.27645	8.7367	16.3792	intron	ENSSSCG00000022553
3	4614060	4614404	8.3822	13.1646	10.5686	intergenic	-
3	4636465	4636790	5.04575	5.75511	4.59901	intergenic	ENSSSCG00000007583
3	4638762	4639023	30.3402	39.5534	17.7306	intergenic	-
3	5129076	5129337	29.5731	142.408	19.4656	intergenic	-
3	5136790	5137007	9.61124	8.94116	8.09558	TSS	ENSSSCG00000028354
3	5169900	5170162	6.99621	11.6489	6.79157	utr_3	ENSSSCG00000024245
3	5170418	5170630	1.61644	2.08051	1.90265	utr_3	ENSSSCG00000024245
3	5170986	5171176	2.76454	4.29845	5.56158	CDS	ENSSSCG00000024245
3	5196572	5196846	6.90502	8.37267	5.50047	CDS	ENSSSCG00000007590
3	5289220	5289421	13.2603	16.9021	6.45286	TSS	ENSSSCG00000025940
3	5383727	5383945	37.4777	19.876	8.16737	intergenic	-
3	5455164	5455471	6.82455	11.761	8.65693	CDS	ENSSSCG00000007599
3	5455164	5455471	6.82455	11.761	8.65693	intron	ENSSSCG00000007602
3	5455832	5456410	6.01224	7.90365	5.79732	CDS	ENSSSCG00000007599
3	5455832	5456410	6.01224	7.90365	5.79732	intron	ENSSSCG00000007602
3	5456723	5456959	9.36366	4.5625	4.46829	CDS	ENSSSCG00000007599
3	5456723	5456959	9.36366	4.5625	4.46829	intron	ENSSSCG00000007602
3	5464942	5465258	10.5587	7.60095	14.7471	intron	ENSSSCG00000007602
3	5464942	5465258	10.5587	7.60095	14.7471	Stop	ENSSSCG00000007599
3	5470598	5470807	22.4122	17.3486	10.3745	intron	ENSSSCG00000007600
3	5470598	5470807	22.4122	17.3486	10.3745	intron	ENSSSCG00000007602
3	5470598	5470807	22.4122	17.3486	10.3745	TSS	ENSSSCG00000007600
3	6086930	6087425	4.74741	4.12422	4.88931	Stop	ENSSSCG00000007606
3	6096716	6097083	6.98158	9.07073	7.75901	utr_3	ENSSSCG00000030153
3	6097778	6098018	17.716	12.7873	10.2172	utr_3	ENSSSCG00000030153
3	6192191	6192424	9.667	8.79498	3.08771	intergenic	-
3	6534286	6534607	1.48235	2.09221	3.09131	intergenic	-
3	6534928	6535229	1.53621	2.2636	2.83709	CDS	ENSSSCG00000007617
3	6535777	6536062	5.28896	7.20777	6.32648	CDS	ENSSSCG00000007617
3	6548466	6548663	3.31301	3.86911	3.42252	intron	ENSSSCG00000007617
3	6581309	6582136	4.45969	6.03462	8.085	CDS	ENSSSCG00000007618
3	6589762	6589991	13.456	12.2314	16.1619	intron	ENSSSCG00000007618
3	6589762	6589991	13.456	12.2314	16.1619	utr_3	ENSSSCG00000022023
3	6616289	6616511	7.48351	10.4294	7.35839	intron	ENSSSCG00000007618
3	6622525	6622719	2.63048	4.39563	4.68218	intron	ENSSSCG00000007618
3	6623446	6623635	1.93369	2.75113	3.10166	Stop	ENSSSCG00000007618
3	6679054	6679255	6.09374	6.37265	3.02762	TSS	ENSSSCG00000007615
3	6688943	6689199	9.41593	8.60561	11.1232	CDS	ENSSSCG00000007622
3	6693110	6693412	8.62083	5.44365	7.51464	Stop	ENSSSCG00000007622
3	6710469	6710687	11.8996	7.83067	3.91615	utr_3	ENSSSCG00000023257
3	6712299	6712502	3.21787	3.28435	2.55467	utr_3	ENSSSCG00000023257
3	7093442	7093640	12.0622	14.9397	8.71186	CDS	ENSSSCG00000007637
3	7191692	7192004	14.3151	13.804	23.3057	intergenic	-
3	7192514	7192823	3.52337	3.62208	4.58714	intergenic	-
3	7193058	7193347	4.71096	10.5422	13.7756	intergenic	-
3	7193666	7194271	7.2446	7.90274	7.31006	intergenic	-
3	7359672	7359865	2.12772	2.74991	1.58292	intergenic	ENSSSCG00000007647
3	7359973	7360210	9.01139	10.8519	5.49676	CDS	ENSSSCG00000007647
3	7430915	7431111	2.48346	2.15449	2.49751	intergenic	ENSSSCG00000007644
3	7700122	7700831	15.8243	13.2834	11.3177	intron	ENSSSCG00000025164
3	7700122	7700831	15.8243	13.2834	11.3177	intron	ENSSSCG00000025958
3	7748773	7749264	8.82367	9.43965	5.85386	utr_5	ENSSSCG00000025164
3	7811329	7811721	17.2207	20.8898	8.90339	CDS	ENSSSCG00000007664
3	7833091	7833291	2.73117	2.31656	1.6055	intergenic	-
3	7841970	7842170	13.6426	12.2314	9.25635	intergenic	-
3	7842425	7842714	4.05095	6.82026	4.42482	intergenic	-
3	7845581	7845878	18.7853	21.201	11.7272	CDS	ENSSSCG00000007667
3	7907437	7907642	7.3235	9.15451	13.0055	intergenic	-
3	7918388	7918603	2.67119	2.69262	2.70949	TSS	ENSSSCG00000027466
3	7947659	7947960	7.08914	8.70296	6.79012	intron	ENSSSCG00000007671
3	8003024	8003690	6.93441	8.52654	8.49874	Stop	ENSSSCG00000007672
3	8116371	8116597	4.26534	5.48662	3.61035	TSS	ENSSSCG00000007675
3	8138756	8139320	10.0437	12.5491	7.72741	CDS	ENSSSCG00000023619
3	8153534	8153802	7.57199	6.06429	10.018	CDS	ENSSSCG00000024789
3	8158659	8159015	13.5457	12.4498	11.9551	intergenic	-
3	9399966	9400153	17.4369	19.9488	12.1927	CDS	ENSSSCG00000007681
3	9467020	9467240	4.14847	5.9539	4.59901	CDS	ENSSSCG00000007682
3	9505525	9506265	13.8176	18.7609	11.8566	CDS	ENSSSCG00000021013
3	9547703	9547890	3.03402	4.25914	2.45993	Stop	ENSSSCG00000007684
3	9620772	9621048	2.90548	4.59549	3.59029	Stop	ENSSSCG00000024397
3	9637060	9637285	10.5458	20.8225	9.48971	intergenic	-
3	9784740	9784930	1.4647	3.18267	3.24102	CDS	ENSSSCG00000025430
3	9908085	9908312	1.4361	1.71949	1.82942	Stop	ENSSSCG00000007692
3	10314194	10314386	8.36972	11.0665	8.36615	CDS	ENSSSCG00000007705
3	10461735	10461937	3.58702	4.62008	4.50135	utr_3	ENSSSCG00000027342
3	10462406	10462816	5.99453	4.871	5.6274	Stop	ENSSSCG00000027342
3	10550432	10550656	3.72588	3.31392	4.46828	utr_3	ENSSSCG00000007708
3	10587059	10587524	2.70444	3.70416	4.98164	Stop	ENSSSCG00000007709
3	10598438	10598645	5.30082	5.34974	2.92418	utr_3	ENSSSCG00000007710
3	10600798	10601028	3.26907	3.00356	2.19676	intron	ENSSSCG00000007710
3	10655267	10655516	5.30953	6.63989	5.92359	Stop	ENSSSCG00000007712
3	10715297	10715615	3.15508	4.5193	6.07013	intergenic	-
3	10777088	10777839	6.93923	10.484	9.72678	utr_3	ENSSSCG00000007718
3	10778280	10778595	1.76233	2.8444	2.79218	utr_5	ENSSSCG00000007718
3	10780854	10781023	11.7176	15.1436	8.21404	intergenic	-
3	11029750	11029994	2.85415	2.39404	2.34431	Stop	ENSSSCG00000025966
3	11130580	11130840	8.22202	9.4264	4.44927	CDS	ENSSSCG00000007719
3	11155433	11155707	7.14645	5.40843	9.98234	CDS	ENSSSCG00000007719
3	11634990	11635266	18.7025	15.1779	6.44915	CDS	ENSSSCG00000007723
3	11667741	11668123	2.28394	3.26412	3.15186	utr_3	ENSSSCG00000007723
3	14851241	14851681	15.2969	16.6069	10.2309	intergenic	-
3	14916993	14917207	7.72437	6.83478	4.2489	CDS	ENSSSCG00000007727
3	14943133	14944418	6.42713	8.12189	8.40878	CDS	ENSSSCG00000007727
3	16505467	16505748	4.15696	5.33194	5.6418	utr_3	ENSSSCG00000007736
3	16507460	16507668	3.69028	4.0086	3.17208	Stop	ENSSSCG00000007736
3	16562421	16562725	10.536	17.4734	30.2038	Stop	ENSSSCG00000007735
3	16739205	16739367	3.38039	4.6313	5.05357	CDS	ENSSSCG00000007737
3	16770792	16771051	5.98797	6.62065	5.50508	intergenic	-
3	16890259	16890618	3.64083	3.42111	3.18361	intergenic	ENSSSCG00000007738
3	16894660	16894873	8.39959	14.1729	4.77727	intron	ENSSSCG00000007738
3	16924732	16924983	1.51088	1.66289	1.33992	TSS	ENSSSCG00000007739
3	16945068	16945256	2.94759	2.99544	3.34329	Stop	ENSSSCG00000028513
3	17016499	17016863	12.0905	13.4485	5.27192	TSS	ENSSSCG00000028513
3	17127487	17127656	3.0503	3.79355	4.27815	intergenic	-
3	17341304	17341523	5.40226	4.58675	3.62994	CDS	ENSSSCG00000007753
3	17362708	17362963	22.0403	21.3175	12.7122	Stop	ENSSSCG00000025245
3	17496336	17496539	2.08773	4.32864	3.94972	Stop	ENSSSCG00000007763
3	17548715	17549003	3.62906	2.4081	1.76542	CDS	ENSSSCG00000030798
3	17549635	17550015	29.8154	32.1766	16.5764	CDS	ENSSSCG00000030798
3	17555642	17555981	23.9596	19.5513	12.5998	CDS	ENSSSCG00000030798
3	17556639	17556900	29.5413	40.2268	24.0432	Stop	ENSSSCG00000030798
3	17731185	17731391	19.8083	16.7745	15.9147	CDS	ENSSSCG00000026817
3	17732459	17732704	15.9955	12.7167	24.8133	CDS	ENSSSCG00000026817
3	17761516	17761767	16.5951	10.3781	6.95542	utr_5	ENSSSCG00000007768
3	17785684	17785934	15.4518	16.4906	8.36615	intergenic	-
3	17805383	17805624	4.57545	7.70418	14.0323	Stop	ENSSSCG00000028186
3	17806068	17806373	17.3672	20.9681	25.3837	utr_3	ENSSSCG00000028186
3	17823268	17823471	4.67309	6.17029	6.58176	CDS	ENSSSCG00000007782
3	17835961	17836506	7.15879	7.97797	4.40336	CDS	ENSSSCG00000007782
3	17952119	17952319	8.11609	7.32077	7.90601	intron	ENSSSCG00000007776
3	17953388	17953675	6.02227	7.02734	3.84655	utr_5	ENSSSCG00000007776
3	17953388	17953675	6.02227	7.02734	3.84655	utr_5	ENSSSCG00000020178
3	18059592	18059875	9.17031	14.634	18.5957	CDS	ENSSSCG00000007780
3	18063342	18063887	9.55912	12.175	11.9253	utr_3	ENSSSCG00000007780
3	18087511	18087695	5.40544	3.82875	4.19038	Stop	ENSSSCG00000007788
3	18111540	18111769	3.18846	2.13737	3.81742	CDS	ENSSSCG00000007789
3	18111946	18112400	6.7875	10.2899	7.66645	CDS	ENSSSCG00000007789
3	18113231	18113488	10.2406	13.105	16.7383	CDS	ENSSSCG00000007789
3	18126761	18127104	3.04537	4.04256	5.3263	CDS	ENSSSCG00000007789
3	18188618	18188813	5.37284	3.7443	2.17982	Stop	ENSSSCG00000025794
3	18188986	18189251	7.60367	9.10802	2.76821	CDS	ENSSSCG00000025794
3	18198343	18198565	19.6443	23.2979	14.1567	intergenic	-
3	18199396	18200005	12.7937	10.9209	12.6543	intergenic	-
3	18226366	18226629	4.7218	7.91027	9.85197	CDS	ENSSSCG00000007785
3	18227217	18227419	3.15259	3.56748	4.88212	intergenic	ENSSSCG00000007785
3	18241355	18241710	5.44032	9.74478	6.71339	intergenic	-
3	18250810	18251863	5.42696	7.94428	8.57659	CDS	ENSSSCG00000007794
3	18298379	18298607	13.4225	13.4295	16.314	Stop	ENSSSCG00000007797
3	18303276	18303920	17.4035	17.9637	12.5761	Stop	ENSSSCG00000023349
3	18304919	18305321	2.80517	3.91293	3.69402	CDS	ENSSSCG00000023349
3	18305618	18306175	21.4321	14.6674	10.2949	utr_5	ENSSSCG00000023349
3	18323486	18324224	3.58914	4.20793	3.94129	intergenic	ENSSSCG00000007795
3	18324941	18325399	2.25222	2.98733	2.41078	intron	ENSSSCG00000007795
3	18363942	18364164	9.81215	6.88855	6.34591	intron	ENSSSCG00000007800
3	18364519	18364737	31.247	57.6622	21.3907	intron	ENSSSCG00000007800
3	18383371	18383750	7.83578	8.75911	3.36352	utr_5	ENSSSCG00000007798
3	18384042	18384542	5.88496	10.12	9.35731	CDS	ENSSSCG00000007798
3	18393541	18393979	7.06122	5.64182	6.47557	Stop	ENSSSCG00000007798
3	18398223	18398510	5.72404	6.7731	4.32722	CDS	ENSSSCG00000007791
3	18398914	18399209	3.02765	5.24202	4.51075	Stop	ENSSSCG00000007791
3	18502138	18502381	6.76901	5.1419	5.23101	utr_3	ENSSSCG00000027629
3	18515084	18515313	3.23669	3.6957	3.05475	CDS	ENSSSCG00000027946
3	18516891	18517174	3.52409	3.19249	3.47006	CDS	ENSSSCG00000027946
3	18519573	18519807	2.80869	2.92988	2.65244	CDS	ENSSSCG00000027946
3	18534439	18534642	2.16851	1.75812	2.0415	Stop	ENSSSCG00000022996
3	18537427	18538141	9.61497	9.85499	6.22976	TSS	ENSSSCG00000022996
3	18544635	18544914	7.03165	6.91721	5.54514	Stop	ENSSSCG00000025321
3	18547175	18547524	2.84085	3.08868	4.63799	CDS	ENSSSCG00000025321
3	18547728	18548405	6.94831	7.7964	4.39783	intron	ENSSSCG00000025321
3	18589234	18589457	5.35356	5.14627	5.73051	intergenic	-
3	18591195	18591423	17.644	17.2373	12.7479	CDS	ENSSSCG00000027454
3	18609562	18609808	11.5655	11.8819	15.4013	utr_3	ENSSSCG00000023772
3	18610214	18610429	13.81	12.9303	16.257	Stop	ENSSSCG00000023772
3	18718640	18718917	25.5741	17.0851	5.7755	intron	ENSSSCG00000007804
3	18720797	18721003	5.39982	5.60988	3.17086	intron	ENSSSCG00000007804
3	18721458	18721948	18.6257	19.6479	19.2517	CDS	ENSSSCG00000007804
3	18727725	18728001	8.78821	12.4884	5.80222	Stop	ENSSSCG00000007804
3	18753947	18754149	2.26161	3.45828	3.10562	Stop	ENSSSCG00000007806
3	18755485	18755691	14.3835	11.3957	9.26932	CDS	ENSSSCG00000007806
3	18796388	18796613	5.25838	6.53502	5.19489	TSS	ENSSSCG00000007808
3	18816257	18816448	5.30082	5.19062	5.24786	TSS	ENSSSCG00000007809
3	19004442	19004701	8.76357	7.61341	2.23414	utr_5	ENSSSCG00000007812
3	19058711	19058923	5.97837	5.28362	6.19594	CDS	ENSSSCG00000007812
3	19111834	19112203	2.7693	3.08585	3.05581	intergenic	ENSSSCG00000007812
3	19668291	19668481	2.47933	3.09756	1.8301	CDS	ENSSSCG00000007815
3	19682269	19682468	23.9932	33.1994	38.9311	Stop	ENSSSCG00000007816
3	19846693	19847435	6.42784	8.30343	10.2223	intergenic	ENSSSCG00000007817
3	19847735	19848728	3.53124	4.93291	5.248	CDS	ENSSSCG00000007817
3	19872584	19872834	5.32074	5.75415	4.90042	Stop	ENSSSCG00000007818
3	22241520	22241734	10.3052	17.619	30.2322	intergenic	-
3	22570193	22571099	17.3517	22.1479	14.8048	intergenic	-
3	23541589	23541813	28.0386	15.7261	31.6584	CDS	ENSSSCG00000030424
3	24288297	24288681	7.62473	13.1845	16.0736	utr_3	ENSSSCG00000007839
3	24335353	24335576	7.83408	10.1928	19.8506	intron	ENSSSCG00000007839
3	24335353	24335576	7.83408	10.1928	19.8506	Stop	ENSSSCG00000007840
3	24342031	24342309	12.3314	8.99882	7.9003	CDS	ENSSSCG00000007840
3	24342031	24342309	12.3314	8.99882	7.9003	intron	ENSSSCG00000007839
3	24817576	24817790	10.4375	8.88231	3.19931	intergenic	-
3	25545985	25546198	11.4386	8.02187	19.2802	intron	ENSSSCG00000007849
3	25968402	25968741	5.95728	5.24202	11.3676	CDS	ENSSSCG00000007854
3	25970698	25971192	7.70981	12.099	12.2715	Stop	ENSSSCG00000007854
3	26077819	26078226	6.44044	8.69149	5.68485	utr_3	ENSSSCG00000024748
3	26138371	26138477	2.39429	3.25557	2.54173	Stop	ENSSSCG00000007858
3	26171983	26172193	15.2329	10.5325	7.39168	intergenic	-
3	26256433	26256634	11.4299	9.17353	4.99117	CDS	ENSSSCG00000026453
3	26735167	26735393	12.1039	21.951	18.0905	utr_3	ENSSSCG00000007864
3	26750282	26750785	9.68224	13.1516	13.5475	CDS	ENSSSCG00000007864
3	26922021	26922215	6.22705	7.90668	7.03105	Stop	ENSSSCG00000029212
3	29067651	29067873	5.12074	7.24155	8.62359	intergenic	-
3	29072450	29072713	6.43421	5.61253	4.86568	CDS	ENSSSCG00000007874
3	29646434	29646608	4.09676	3.4665	3.20861	intron	ENSSSCG00000007878
3	29976916	29977117	11.8013	11.9137	28.0931	intergenic	-
3	30060356	30060565	5.54494	6.75108	4.23537	intron	ENSSSCG00000023626
3	30289070	30289364	20.4221	15.1436	12.8344	utr_3	ENSSSCG00000007881
3	30290691	30290916	6.73983	9.31914	6.77373	CDS	ENSSSCG00000007881
3	32030544	32030822	5.22775	4.0698	3.5045	intergenic	-
3	32129743	32129973	4.26095	9.37209	12.264	intron	ENSSSCG00000007888
3	32134368	32134561	4.91721	6.06429	8.08094	intergenic	-
3	32449531	32449724	2.61315	3.89268	4.62817	Stop	ENSSSCG00000028743
3	32604473	32604684	21.3428	19.2207	12.264	TSS	ENSSSCG00000022149
3	33141783	33142007	5.73924	6.83518	15.1161	CDS	ENSSSCG00000007901
3	33142580	33142923	7.44465	18.0849	8.9306	CDS	ENSSSCG00000007901
3	33292794	33293032	4.30443	3.7859	1.56245	intergenic	-
3	33293474	33293688	1.59423	3.62253	5.31204	intergenic	-
3	33294176	33294388	13.7635	10.4046	10.8855	intergenic	-
3	34446987	34447621	14.6142	16.0557	9.15657	intergenic	ENSSSCG00000028454
3	34622773	34623590	5.3316	6.72376	7.09515	Stop	ENSSSCG00000021288
3	34638589	34638812	8.04572	10.5386	20.1358	intergenic	-
3	34687125	34687325	3.00717	3.56188	2.74468	Stop	ENSSSCG00000007907
3	34742788	34743125	15.9072	16.0143	7.82711	TSS	ENSSSCG00000007907
3	34778436	34778908	5.53051	5.55639	4.49302	utr_3	ENSSSCG00000026710
3	34790632	34791862	4.36961	5.69775	5.90122	utr_3	ENSSSCG00000021236
3	38384839	38385023	7.36532	19.2207	6.36374	CDS	ENSSSCG00000007925
3	38394167	38394499	5.57981	7.7991	9.55453	utr_3	ENSSSCG00000007925
3	38466737	38466948	2.88074	4.52436	3.19734	utr_5	ENSSSCG00000007927
3	38514368	38515411	6.36393	5.63517	5.51271	CDS	ENSSSCG00000007927
3	38515597	38516629	11.4609	10.3171	9.48857	CDS	ENSSSCG00000007927
3	38517352	38517604	3.45706	4.14597	4.96994	intergenic	-
3	38625935	38626107	2.48999	3.57065	3.275	intergenic	-
3	38662403	38662764	7.48253	7.84529	8.59732	intergenic	ENSSSCG00000007931
3	38663041	38663257	1.86104	3.08294	3.33801	intergenic	-
3	38670698	38670935	5.71931	8.75451	6.393	utr_3	ENSSSCG00000007932
3	38747728	38748014	7.63736	5.87186	5.81324	Stop	ENSSSCG00000007939
3	38754085	38754567	4.81685	4.5491	4.45324	intergenic	ENSSSCG00000007930
3	38816790	38817544	5.18604	7.27456	6.81402	Stop	ENSSSCG00000023603
3	38896978	38897289	5.69881	6.67358	6.78572	CDS	ENSSSCG00000007942
3	38899090	38899395	6.18038	5.30581	5.98942	TSS	ENSSSCG00000007942
3	38930382	38930598	6.59115	5.63764	4.14446	TSS	ENSSSCG00000007943
3	38931045	38931248	5.07498	4.60892	3.73148	CDS	ENSSSCG00000007943
3	38938907	38939174	5.9199	6.60948	8.79046	intergenic	-
3	38973782	38974018	4.21586	7.03096	3.57808	TSS	ENSSSCG00000022874
3	39016831	39017527	4.31167	5.27514	3.51171	intron	ENSSSCG00000007944
3	39016831	39017527	4.31167	5.27514	3.51171	Stop	ENSSSCG00000025561
3	39017756	39018882	4.93898	7.87731	6.52591	CDS	ENSSSCG00000025561
3	39017756	39018882	4.93898	7.87731	6.52591	intron	ENSSSCG00000007944
3	39069871	39070549	7.97739	10.7153	10.4037	CDS	ENSSSCG00000023653
3	39071198	39071411	5.78272	5.36683	3.97257	utr_3	ENSSSCG00000023653
3	39139111	39139372	14.6224	14.9009	8.01758	intergenic	-
3	39140187	39140445	4.32435	6.88852	6.29139	intergenic	-
3	39476827	39477872	6.15421	7.36038	7.40584	CDS	ENSSSCG00000007950
3	39539012	39539288	19.2188	17.9873	10.2676	TSS	ENSSSCG00000007951
3	39862647	39862850	2.8457	3.26728	3.47359	Stop	ENSSSCG00000007952
3	39862647	39862850	2.8457	3.26728	3.47359	Stop	ENSSSCG00000007953
3	40173524	40173787	13.3078	21.5297	21.6046	intergenic	-
3	40174067	40174244	13.6377	15.6096	9.52598	CDS	ENSSSCG00000007958
3	40200810	40201416	5.95079	7.94312	7.24543	intergenic	-
3	40295389	40295622	41.3702	22.917	21.9612	CDS	ENSSSCG00000007963
3	40461459	40461639	3.15259	4.40329	4.27815	Stop	ENSSSCG00000007967
3	40461943	40462176	14.2666	26.6866	8.85574	CDS	ENSSSCG00000007967
3	40478627	40478917	21.004	20.7625	15.5523	intergenic	ENSSSCG00000029375
3	40479515	40479877	7.22439	9.07545	5.60585	CDS	ENSSSCG00000029375
3	40535387	40535576	10.4375	6.3237	3.38829	TSS	ENSSSCG00000023315
3	40535387	40535576	10.4375	6.3237	3.38829	TSS	ENSSSCG00000023315
3	40535387	40535576	10.4375	6.3237	3.38829	TSS	ENSSSCG00000027252
3	40613492	40613776	15.5097	13.0504	9.80844	TSS	ENSSSCG00000023304
3	40616824	40617104	6.60633	6.68601	5.63575	CDS	ENSSSCG00000023304
3	40635963	40636162	7.79181	15.7261	5.08345	intron	ENSSSCG00000008061
3	40865198	40865542	14.3637	16.1779	13.2122	intergenic	-
3	40894872	40895341	8.80088	9.14305	6.48622	CDS	ENSSSCG00000007982
3	40897469	40897644	2.81648	4.16814	3.89585	Stop	ENSSSCG00000007982
3	40960961	40961660	30.2649	23.6764	17.8566	utr_3	ENSSSCG00000007979
3	40962615	40963308	7.07038	6.78226	6.65564	Stop	ENSSSCG00000007979
3	40963945	40964145	4.03716	4.54603	3.46083	CDS	ENSSSCG00000007979
3	40991006	40991219	7.82442	10.9769	4.48515	intergenic	ENSSSCG00000007979
3	41041677	41042043	6.28318	6.14633	5.63534	CDS	ENSSSCG00000023204
3	41078947	41079190	3.72452	2.32317	2.74839	CDS	ENSSSCG00000023204
3	41079398	41079744	5.87827	10.1605	6.41722	CDS	ENSSSCG00000023204
3	41083059	41083341	11.3136	11.9887	3.70773	intergenic	-
3	41098606	41098800	3.22322	5.38763	5.39047	intergenic	ENSSSCG00000007985
3	41107896	41108170	12.45	12.655	5.6227	TSS	ENSSSCG00000007985
3	41132805	41133342	3.94186	4.53318	2.65245	intergenic	-
3	41134825	41135058	2.73625	3.96693	0.713025	intergenic	-
3	41135568	41135769	3.72832	5.85092	0.855629	intergenic	-
3	41136771	41137029	2.58129	3.05254	1.95672	intergenic	-
3	41143287	41143530	8.14437	9.06432	4.45828	intergenic	-
3	41143672	41143869	5.06368	7.05656	5.13378	intergenic	-
3	41290388	41290685	5.87741	6.65182	3.23917	CDS	ENSSSCG00000007993
3	41300258	41300493	3.38905	4.05065	2.29309	Stop	ENSSSCG00000007994
3	41303888	41304073	17.7857	16.7453	13.6901	intron	ENSSSCG00000007994
3	41348616	41348815	11.1089	9.82608	6.56669	TSS	ENSSSCG00000007995
3	41376538	41376941	4.51965	5.56964	4.52031	intergenic	ENSSSCG00000007997
3	41381886	41382245	3.61934	3.40203	2.82494	intron	ENSSSCG00000007999
3	41382454	41382656	8.00113	6.74637	5.76795	TSS	ENSSSCG00000008008
3	41386504	41386766	11.055	13.0023	7.54903	intron	ENSSSCG00000007988
3	41391689	41392041	15.3773	20.3243	18.9535	intron	ENSSSCG00000008007
3	41418635	41418838	4.97261	5.77473	3.04956	TSS	ENSSSCG00000008004
3	41428321	41428671	4.23885	4.9732	4.67818	intergenic	ENSSSCG00000008002
3	41465402	41465898	6.32058	7.178	6.69895	intergenic	ENSSSCG00000008000
3	41466669	41466869	6.8004	5.21191	4.91989	intron	ENSSSCG00000008000
3	41548575	41548762	2.66861	2.17325	1.6106	Stop	ENSSSCG00000008009
3	41623042	41623284	1.85447	2.6467	1.91587	CDS	ENSSSCG00000008015
3	41633208	41633559	3.38993	6.29457	4.47948	Stop	ENSSSCG00000008014
3	41634268	41635051	4.23387	6.76217	5.85082	CDS	ENSSSCG00000008013
3	41635260	41635587	2.84938	4.77525	4.14774	CDS	ENSSSCG00000008013
3	41636756	41637646	6.52376	7.05869	4.23864	TSS	ENSSSCG00000008013
3	41645717	41645918	32.4746	58.5359	20.5351	intergenic	-
3	41658788	41659021	3.21593	4.25156	3.90698	Stop	ENSSSCG00000008016
3	41659376	41659578	14.5732	15.8353	6.98763	intergenic	-
3	41682158	41682416	3.24327	3.35817	2.9533	intron	ENSSSCG00000008018
3	41705300	41705622	12.7166	11.6572	10.3934	utr_5	ENSSSCG00000008018
3	41710435	41710653	10.2828	8.75055	5.39419	Stop	ENSSSCG00000008019
3	41725026	41725315	11.4851	29.3771	10.6728	Stop	ENSSSCG00000008026
3	41737042	41737237	8.43947	10.484	8.08959	CDS	ENSSSCG00000008026
3	41737400	41737617	6.77947	7.08643	6.41722	CDS	ENSSSCG00000008026
3	41768452	41768689	20.1601	11.3577	20.7796	TSS	ENSSSCG00000008026
3	41806189	41806610	5.83911	5.59339	5.01493	intron	ENSSSCG00000008020
3	41806189	41806610	5.83911	5.59339	5.01493	Stop	ENSSSCG00000008021
3	41818083	41818298	4.92752	5.98721	4.57877	CDS	ENSSSCG00000008021
3	41818083	41818298	4.92752	5.98721	4.57877	intron	ENSSSCG00000008020
3	41835508	41835691	1.2164	1.74734	0.697524	intergenic	-
3	41899775	41899989	8.18662	11.183	5.51881	intergenic	-
3	41986761	41987122	8.95406	12.9169	15.0513	Stop	ENSSSCG00000008030
3	41989031	41989237	2.55384	3.64029	2.09629	intron	ENSSSCG00000008030
3	42010671	42011011	4.37739	7.42267	5.44521	utr_3	ENSSSCG00000008031
3	42010671	42011011	4.37739	7.42267	5.44521	utr_3	ENSSSCG00000022963
3	42011648	42011931	4.82753	5.46043	3.732	utr_3	ENSSSCG00000008031
3	42011648	42011931	4.82753	5.46043	3.732	utr_3	ENSSSCG00000022963
3	42012192	42012456	5.78906	11.2673	9.2803	Stop	ENSSSCG00000022963
3	42012192	42012456	5.78906	11.2673	9.2803	utr_3	ENSSSCG00000008031
3	42013169	42013444	11.9108	16.658	7.81476	CDS	ENSSSCG00000022963
3	42082566	42083087	5.27585	5.62061	5.46108	Stop	ENSSSCG00000024405
3	42209651	42209978	5.42264	7.89598	8.49828	Stop	ENSSSCG00000023400
3	42210910	42211225	5.16133	5.03753	3.34747	CDS	ENSSSCG00000023400
3	42211882	42212112	10.8567	8.15425	6.90206	CDS	ENSSSCG00000023400
3	42218559	42218791	15.6633	10.6005	7.67814	CDS	ENSSSCG00000023400
3	42237102	42237396	2.97954	2.73647	2.25785	CDS	ENSSSCG00000008038
3	42238251	42238554	5.19048	5.92153	6.49645	Stop	ENSSSCG00000008038
3	42239875	42240125	1.78264	3.88298	4.82663	Stop	ENSSSCG00000008039
3	42244123	42244322	9.29476	7.4659	5.66855	CDS	ENSSSCG00000008039
3	42277897	42278100	2.48829	3.23581	2.64969	CDS	ENSSSCG00000008040
3	42282159	42282419	1.47466	2.6467	1.34456	utr_3	ENSSSCG00000008040
3	42282159	42282419	1.47466	2.6467	1.34456	utr_3	ENSSSCG00000008041
3	42305953	42306231	8.82042	15.9132	16.2066	CDS	ENSSSCG00000008041
3	42306491	42306783	13.0053	10.6587	14.617	CDS	ENSSSCG00000008041
3	42334179	42334408	4.18486	15.9276	18.1515	intergenic	-
3	42340263	42340512	2.51092	13.9787	12.1214	intergenic	-
3	42403966	42404197	10.1563	11.0989	5.23812	intergenic	ENSSSCG00000008046
3	42408904	42409075	5.5369	6.00645	2.8273	CDS	ENSSSCG00000008047
3	42418511	42418641	4.18486	5.89727	3.48363	Stop	ENSSSCG00000008047
3	42434054	42434594	11.1135	10.8291	10.1364	utr_3	ENSSSCG00000008051
3	42509842	42510001	6.92111	8.17505	3.20069	utr_5	ENSSSCG00000008048
3	42610237	42610580	4.36005	5.16009	7.06824	TSS	ENSSSCG00000022316
3	42689862	42690058	2.90848	2.22389	4.02146	utr_3	ENSSSCG00000027098
3	42690381	42690575	5.50639	8.7367	10.0536	utr_3	ENSSSCG00000027098
3	42701008	42701197	38.0823	41.4993	9.04523	intron	ENSSSCG00000008056
3	42707066	42707266	7.11426	8.7367	4.0421	intron	ENSSSCG00000008057
3	42716267	42716473	3.38039	3.42186	2.89964	Stop	ENSSSCG00000008057
3	42775783	42775993	3.74819	3.69324	3.09452	intergenic	-
3	42776465	42776709	2.58308	2.6724	2.04035	intergenic	-
3	42824454	42824912	5.99677	7.46161	8.44027	intron	ENSSSCG00000008062
3	42826070	42826346	11.606	9.40875	4.70596	intron	ENSSSCG00000008062
3	42828362	42828536	4.43103	6.15937	6.91634	intron	ENSSSCG00000008062
3	43235386	43235589	4.18486	5.5656	6.05278	CDS	ENSSSCG00000008069
3	43476075	43476330	7.83168	9.91618	9.54029	intron	ENSSSCG00000008070
3	43476075	43476330	7.83168	9.91618	9.54029	utr_3	ENSSSCG00000028549
3	43705266	43705468	15.9602	14.6776	7.27285	TSS	ENSSSCG00000027166
3	44044687	44045009	4.99181	6.31219	9.45264	intergenic	-
3	44321444	44321649	4.27977	4.84746	3.2779	CDS	ENSSSCG00000008079
3	44432802	44432999	6.75157	7.76595	2.68912	utr_3	ENSSSCG00000008080
3	44891828	44892050	10.3924	11.5593	11.1232	intergenic	-
3	45544831	45545377	3.63793	4.23891	5.55352	CDS	ENSSSCG00000008098
3	45683575	45683851	7.07623	11.3577	15.0448	CDS	ENSSSCG00000008096
3	45742236	45742579	3.42573	4.31981	2.8358	intergenic	-
3	45960219	45960445	4.12048	7.70418	9.72306	Stop	ENSSSCG00000022493
3	47767635	47768125	12.8336	14.219	15.5154	intergenic	-
3	48584372	48584666	4.6772	6.46515	6.60055	CDS	ENSSSCG00000008122
3	48585401	48585666	5.66858	4.19927	2.69852	intergenic	-
3	49105021	49105245	4.13085	5.68901	6.02921	intergenic	ENSSSCG00000008130
3	49119990	49120169	3.06256	4.87564	3.34198	intergenic	-
3	49120744	49121403	5.67239	8.82934	11.416	intergenic	-
3	49134699	49135235	5.72124	5.52515	3.51445	intergenic	ENSSSCG00000008132
3	49717265	49717831	6.16056	6.74834	5.47603	CDS	ENSSSCG00000008136
3	49718590	49718828	3.73536	4.01888	5.05099	CDS	ENSSSCG00000008136
3	49719490	49719875	4.15633	4.39747	3.97257	CDS	ENSSSCG00000008136
3	49896589	49896796	5.40812	4.27735	4.5094	CDS	ENSSSCG00000008138
3	50754030	50754348	27.1551	31.8016	36.1076	CDS	ENSSSCG00000008141
3	51083036	51083224	7.48044	9.81198	9.19802	Stop	ENSSSCG00000008143
3	51413278	51413499	1.99013	2.22162	1.91587	CDS	ENSSSCG00000008144
3	51492184	51492384	10.3871	12.7018	7.36513	intergenic	-
3	51610259	51610418	6.81708	3.90989	5.16547	intergenic	ENSSSCG00000008147
3	51799772	51800216	5.80846	9.13535	6.31106	Stop	ENSSSCG00000024636
3	51834555	51835207	5.21031	7.93406	6.93698	CDS	ENSSSCG00000024636
3	51889336	51889543	5.35155	3.80505	3.8707	Stop	ENSSSCG00000028020
3	54731000	54731203	4.77383	5.21015	5.04984	CDS	ENSSSCG00000008162
3	55034672	55034908	6.39686	9.91868	10.2248	utr_3	ENSSSCG00000008164
3	55068457	55068744	21.179	8.69787	9.75879	CDS	ENSSSCG00000008164
3	55077198	55077431	8.16683	7.2206	6.20331	CDS	ENSSSCG00000008164
3	55578276	55578648	3.56748	4.3397	2.81955	TSS	ENSSSCG00000008168
3	55610439	55610799	5.17341	7.55422	6.74863	utr_3	ENSSSCG00000008167
3	55611012	55611355	2.44484	2.63729	3.86384	Stop	ENSSSCG00000008167
3	55626715	55626985	17.3149	25.7733	8.95558	TSS	ENSSSCG00000008167
3	56483603	56483819	7.89145	14.3531	20.3212	Stop	ENSSSCG00000008175
3	57414768	57415060	26.9505	43.2697	46.3751	CDS	ENSSSCG00000008179
3	57499168	57499399	2.57656	2.31656	2.76914	Stop	ENSSSCG00000008180
3	57499168	57499399	2.57656	2.31656	2.76914	utr_3	ENSSSCG00000008179
3	57523759	57523968	8.98643	3.97123	4.87451	CDS	ENSSSCG00000008180
3	57565846	57566096	11.5	13.1476	12.1996	intergenic	-
3	58217394	58217661	2.43813	4.53695	4.06061	intergenic	-
3	58220404	58220617	3.62348	4.37969	8.11065	Stop	ENSSSCG00000025010
3	58409919	58410127	19.0982	31.2337	19.9647	intergenic	-
3	58847923	58848152	2.9015	1.85463	3.50808	intergenic	-
3	59248144	59248424	15.8626	15.9881	19.1498	intron	ENSSSCG00000008193
3	59248144	59248424	15.8626	15.9881	19.1498	Stop	ENSSSCG00000008197
3	59256477	59256763	73.7731	51.7649	8.17881	intron	ENSSSCG00000008193
3	59465634	59466970	10.4943	15.8938	11.9346	CDS	ENSSSCG00000008201
3	59509645	59510004	16.1256	16.46	11.1639	intergenic	-
3	59513888	59514679	7.79743	9.06952	10.7076	intergenic	ENSSSCG00000008202
3	59864630	59864828	7.27913	7.36379	3.77904	nc_exon	ENSSSCG00000008207
3	60031309	60031510	5.93489	9.80451	5.04821	utr_5	ENSSSCG00000008208
3	60093244	60093615	18.3113	28.9215	49.7977	CDS	ENSSSCG00000008208
3	60553255	60553463	2.65381	3.09424	2.75898	nc_exon	ENSSSCG00000023294
3	60840997	60841512	15.2005	17.9775	18.8022	utr_3	ENSSSCG00000008216
3	60939999	60940128	3.24327	3.33583	3.76477	CDS	ENSSSCG00000008218
3	60940545	60941018	5.848	5.72458	6.37902	CDS	ENSSSCG00000008218
3	61605016	61605269	9.12885	9.22813	6.87021	CDS	ENSSSCG00000008226
3	61608979	61609352	1.85994	2.22936	3.35121	utr_3	ENSSSCG00000008226
3	61722776	61722983	6.03612	5.62487	4.17894	TSS	ENSSSCG00000025805
3	61767619	61767823	4.29438	5.15636	5.25601	CDS	ENSSSCG00000008227
3	61786951	61787413	6.62505	5.79497	10.2511	intergenic	-
3	62024914	62025287	14.5905	18.4815	15.5236	CDS	ENSSSCG00000008230
3	62131228	62131447	4.91023	4.37667	2.46318	utr_3	ENSSSCG00000022300
3	62253770	62253992	7.50035	8.24062	4.89611	utr_5	ENSSSCG00000022820
3	62275598	62275836	3.65313	4.03135	4.65173	Stop	ENSSSCG00000027381
3	62308245	62308468	3.18412	2.32814	2.02568	intergenic	-
3	62323220	62323429	7.0515	6.2501	3.13123	intergenic	-
3	71103418	71103626	10.7285	10.0623	11.3033	Stop	ENSSSCG00000021007
3	71150886	71151066	4.83053	3.70025	2.58702	intergenic	-
3	71294477	71294772	3.52941	3.46737	3.04674	intergenic	-
3	71759447	71759678	7.32055	6.10244	4.87336	CDS	ENSSSCG00000008274
3	71759447	71759678	7.32055	6.10244	4.87336	intron	ENSSSCG00000008268
3	71836728	71837019	9.97617	7.93583	7.55094	CDS	ENSSSCG00000008287
3	71836728	71837019	9.97617	7.93583	7.55094	intron	ENSSSCG00000008268
3	71837769	71838031	43.3685	25.5151	14.3012	intron	ENSSSCG00000008268
3	71837769	71838031	43.3685	25.5151	14.3012	intron	ENSSSCG00000008273
3	71843702	71844059	5.09641	5.52981	4.07603	CDS	ENSSSCG00000022786
3	71843702	71844059	5.09641	5.52981	4.07603	intron	ENSSSCG00000008268
3	71850673	71850909	3.0131	2.90641	2.42325	Stop	ENSSSCG00000008268
3	72081219	72081562	12.8535	12.4498	16.7458	CDS	ENSSSCG00000008292
3	72081761	72081950	10.0437	17.9102	17.4335	CDS	ENSSSCG00000008292
3	72454476	72454662	3.82002	5.12288	5.84376	utr_3	ENSSSCG00000021579
3	72757057	72757274	2.48476	3.91742	3.76477	Stop	ENSSSCG00000008305
3	73032764	73032976	2.76565	3.31336	2.44304	Stop	ENSSSCG00000008307
[truncated: 6,387 more rows]
